# Supplementary material
Source: Research Square preprint supplement (doi:10.21203/rs.3.rs-9040343/v1)
Supplement: Supplementary file 1 [file 14a957c884c95f344f2bb198.xlsx]

## Sheet: Pink
nodeName	Compounds	degree	ClassⅠ	ClassⅡ	Formula	Q1 (Da)	Q3 (Da)	Molecular weight (Da)	Ionization model	Level	CAS	cpd_ID	120DAI_1	120DAI_2	120DAI_3	180DAI_1	180DAI_2	180DAI_3	240DAI_1	240DAI_2	240DAI_3	300DAI_1	300DAI_2	300DAI_3	360DAI_1	360DAI_2	360DAI_3	QC01	QC02	QC03	kegg_map	mw_cpd_ID	mw_map
Safp010408	Difenoconazole	29	Alkaloids	Alkaloids	C19H17Cl2N3O3	406.07	251	405.065	[M+H]+	1	119446-68-3	C18459	1.04154e+06	1.18488e+06	1.04192e+06	336489	308617	390965	291535	304357	298467	93803.4	114116	112393	610130	636760	592791	607751	573212	590933	-	C18459	-
Waln009920	1-(2,3-dihydroxypropoxy)-3-(((2-(dimethylamino)ethoxy)(hydroxy)phosphoryl)oxy)propan-2-yl (8E,11Z,14Z)-octadeca-8,11,14-trienoate*	15	Lipids	LPE	C28H52NO9P	576.33	277.22	577.338	[M-H]-	1	-	-	129872	113569	100901	54328.3	52837.1	50218.1	59909.9	76281.9	65654.1	29161.3	21805.2	29766.6	75002.4	78328	74540.4	73964.4	75166.3	75202.8	-	-	-
pmb0865	LysoPC 18:3(2n isomer)*	14	Lipids	LPC	C26H48NO7P	518.32	184.07	517.317	[M+H]+	1	-	-	1.84696e+06	1.81709e+06	1.65622e+06	856135	846377	860210	1.08999e+06	1.2748e+06	1.16398e+06	467502	449997	486849	1.35412e+06	1.48206e+06	1.36897e+06	1.47224e+06	1.26789e+06	1.43032e+06	-	-	-
Rfmb087	9-Hydroxy-13-oxo-10-octadecenoic Acid	14	Lipids	Free fatty acids	C18H32O4	311.22	293.21	312.23	[M-H]-	3	-	-	149975	162832	131876	87159.8	67913.8	81789.6	84302.8	84579.2	88057	31390.1	34873.6	41564.7	99790.5	106416	106237	83863	96466.2	90311.7	-	-	-
PDP239459	Phosphatidylcholine lyso 18:3	11	Lipids	LPC	C26H48NO7P	518.32	184.08	517.317	[M+H]+	1	-	-	1.83871e+06	2.07337e+06	1.76921e+06	899628	835792	874429	1.10068e+06	1.33116e+06	1.24837e+06	444273	517816	542489	1.48749e+06	1.47146e+06	1.52338e+06	1.47865e+06	1.46089e+06	1.42577e+06	-	-	-
Zbn009590	5,15-O-Dimethyl morindol	11	Quinones	Anthraquinone	C17H14O6	313.07	270.06	314.081	[M-H]-	2	-	-	449617	427298	415864	722179	771199	731189	738574	663168	715593	967129	880527	938242	611014	660292	717635	684224	740983	701514	-	-	-
ML10171848	D-Arabinono-1,4-lactone	11	Others	Saccharides	C5H8O5	147.03	85.03	148.037	[M-H]-	1	2782-09-4	C00652	235973	220797	216592	122404	121379	148813	105986	116543	94149.1	75557.7	77877.1	85987.7	173941	165211	175009	155039	150422	140978	ko00053,ko01100	C00652	-
Waln010192	2-(2,3-dihydroxypropoxy)-3-(((2-(dimethylamino)ethoxy)(hydroxy)phosphoryl)oxy)propyl (8E,11Z,14Z)-octadeca-8,11,14-trienoate*	10	Lipids	LPE	C28H52NO9P	576.33	277.22	577.338	[M-H]-	1	-	-	130125	116717	95979.8	58985.2	50956.3	56653.9	65471.1	82205.5	67672	25899.3	23862.5	24922.4	80723.6	86762.6	79169.4	81977.6	70710.3	82020.6	-	-	-
Walbn07770	3-(((2-(dimethylamino)ethoxy)(hydroxy)phosphoryl)oxy)-2-hydroxypropyl (9Z,12Z,15E)-octadeca-9,12,15-trienoate*	7	Lipids	LPE	C25H46NO7P	502.29	277.22	503.301	[M-H]-	3	-	-	39383.3	33641.8	34077.4	16262.2	14089.2	17189.3	16786.8	27879.9	23106.6	8641.71	7099.28	8460.13	22484.1	21297.1	30058.3	21811.2	25125.8	29272	-	-	-
Zajn002491	Catechin 4'-O-beta-D-glucopyranoside*	6	Flavonoids	Flavanols	C21H24O11	451.12	289.07	452.132	[M-H]-	2	-	-	49736.3	54488.9	58209.8	101870	141838	116455	117655	98677.1	101847	181074	158138	149841	84050.2	76054.3	100915	97084.8	104015	125442	-	-	-
Lmsn102501	Rhein	5	Quinones	Anthraquinone	C15H8O6	283.02	255.03	284.032	[M-H]-	3	478-43-3	C10401	10181.8	11816.5	14900.4	34551.6	40506.4	35739.3	32250.1	25001.3	34475.8	37651.6	43480.6	42488.9	18040	23924.8	23971.5	27491.5	27225.4	29456.1	-	C10401	-
Rfn01259	(2R,4R)-4-methylpyrrolidine-2-carboxylic acid	4	Alkaloids	Alkaloids	C6H11NO2	130.09	84.09	129.079	[M+H]+	1	31137-95-8	-	1.49405e+07	1.53211e+07	1.28792e+07	6.1401e+06	5.92872e+06	5.87714e+06	4.50174e+06	4.84307e+06	4.76437e+06	4.94883e+06	4.9795e+06	4.70302e+06	1.09071e+07	1.02471e+07	1.00404e+07	9.54862e+06	8.78232e+06	9.42109e+06	-	-	-
Lmhp008744	1-α-Linolenoyl-glycerol-2,3-di-O-glucoside*	4	Lipids	Glycerol ester	C33H56O14	677.37	261.22	676.367	[M+H]+	1	-	-	51562.2	34785.8	30664.6	12039.9	13109.9	11998.7	24742.5	17385.3	26233.3	2399.75	2399.75	2399.75	32080.5	32537.2	12183.5	31090.1	35908.2	25821.2	-	-	-
Lmmn003663	5-Glucosyloxy-2-Hydroxybenzoic acid methyl ester*	4	Phenolic acids	Phenolic acids	C14H18O9	329.09	167.04	330.095	[M-H]-	1	-	-	442571	458100	436476	825216	967873	921323	771390	787563	697739	965804	1.23974e+06	933404	563831	619425	647330	651522	754921	631300	-	CM02422	MetMap159
Walbn07570	1-(((2-(dimethylamino)ethoxy)(hydroxy)phosphoryl)oxy)-3-hydroxypropan-2-yl (9Z,12Z,15E)-octadeca-9,12,15-trienoate*	4	Lipids	LPE	C25H46NO7P	502.29	277.22	503.301	[M-H]-	3	-	-	41587.9	36830	28424.3	14529.2	15179.8	17830.2	17277.1	25075.9	17778.7	7585.47	6311.79	7367.82	20617	17629.1	31105.5	25705.9	30065.9	25577.1	-	-	-
pmn001511	3-Hydroxy-5-Methylphenol-1-O-Glucoside	4	Others	Others	C13H18O7	285.1	123.05	286.105	[M-H]-	3	-	-	89823.4	88044	115760	130074	155304	138857	116378	121371	112464	148732	166670	161385	108834	111093	113847	121997	125944	113567	-	-	-
pme3154	(R)-Mevalonate	4	Organic acids	Organic acids	C6H12O4	147.07	59.01	148.074	[M-H]-	3	150-97-0	C00418	116481	115245	126118	66601.9	56937.8	68753.5	60089.8	66286.7	45342.7	33057.2	53296.1	45256.5	83460	75613.8	83083.2	84996	97359.7	78401.7	ko00900,ko01100,ko01110	C00418	-
Lazp007726	Tupichinol E	3	Flavonoids	Flavonols	C17H14O6	315.09	300.06	314.079	[M+H]+	2	-	-	532294	450803	573203	1.40215e+06	1.00203e+06	1.08411e+06	1.08348e+06	943011	917600	1.65421e+06	1.33067e+06	1.53162e+06	755095	1.0751e+06	922016	1.21401e+06	865809	1.14635e+06	-	-	-
PD0942636	beta-Apo-13-carotenone	3	Terpenoids	Sesquiterpenoids	C18H26O	259.21	119.09	258.198	[M+H]+	1	1220-77-5	-	120006	119034	108974	210186	187600	186023	188322	194664	183553	208516	202858	200321	136284	144097	140588	244097	225130	220093	-	-	-
mws0018	Spermine	3	Alkaloids	Alkaloids	C10H26N4	203.22	84.08	202.216	[M+H]+	3	71-44-3	C00750	7.68968e+06	7.84742e+06	7.71753e+06	5.74063e+06	5.10809e+06	5.85709e+06	4.78434e+06	6.4666e+06	4.74956e+06	4.53512e+06	4.86939e+06	4.81592e+06	5.53357e+06	6.62344e+06	7.11987e+06	6.2821e+06	5.59393e+06	4.22402e+06	ko00330,ko00410,ko00480,ko00770,ko01100,ko01240	C00750	-
Lmsp008392	4',5-Dihydroxy-3',5'-dimethoxyflavone	3	Flavonoids	Flavones	C17H14O6	315.09	272.07	314.079	[M+H]+	1	-	-	76766.2	76766.2	76766.2	713999	756484	622257	594162	554965	560279	676209	831300	803512	450960	383831	453612	489132	541711	583174	-	-	-
mws0147	3-Hydroxyisovalerate	3	Organic acids	Organic acids	C5H10O3	117.06	59.01	118.063	[M-H]-	3	625-08-1	C20827	238156	263791	217500	126112	133903	121774	116889	119361	118057	120379	109861	143190	166493	211102	207776	170389	156531	176065	ko00280,ko01100	C20827	-
Zbrn008158	Chrysoeriol	3	Flavonoids	Flavones	C16H12O6	299.06	284.03	300.063	[M-H]-	3	491-71-4	C04293	2216.34	2216.34	2216.34	22817.8	25501.7	22400.1	20721.3	20893.6	31159.1	31203	27610.7	30782.3	13780.9	17271.2	11081.7	15643.1	25665.4	19585.5	ko00944	C04293	MetMap106
MWSprf094	Tracheloside	3	Lignans and Coumarins	Lignans	C27H34O12	549.2	387.14	550.205	[M-H]-	3	33464-71-0	-	3328.87	3328.87	3328.87	28175.9	27902.9	29015.7	36036.1	21217.2	31486.6	46720.8	42618.5	34314.7	16644.4	21030.4	25932.4	25426	30515.4	34056.8	-	-	-
Lagp003275	Malonyl roseoside	2	Terpenoids	Sesquiterpenoids	C22H32O11	473.2	207.14	472.195	[M+H]+	1	-	-	1.1026e+06	1.15485e+06	1.20651e+06	769773	589000	841488	802511	875200	648897	794767	539078	484128	915305	868954	1.22108e+06	1.00554e+06	902351	685740	-	-	-
WaTKp26206	9-cis-β-apo-13-carotenone*	2	Terpenoids	Sesquiterpenoids	C18H26O	259.21	175.15	258.198	[M+H]+	1	-	-	174832	137508	113113	250808	250098	218113	223869	216865	200122	219746	227176	248758	187980	189364	169998	282855	224652	264745	-	-	-
Wagp006699	Cirsilineol 5-[6''-(3-Hydroxy-3-Methylglutaryl)Glucoside]*	2	Flavonoids	Flavones	C30H34O16	651.19	345.1	650.185	[M+H]+	2	-	-	295542	234346	225038	545603	425612	392459	430688	401840	522601	546089	587204	418970	292642	358609	371413	268297	438210	406076	-	-	-
Zmxp005470	Tricin-7-O-(6''-O-malonyl)glucoside*	2	Flavonoids	Flavones	C26H26O15	579.13	331.08	578.127	[M+H]+	2	-	-	759824	779757	692672	1.11957e+06	1.27822e+06	1.22911e+06	888973	927558	999734	1.26322e+06	1.30838e+06	1.38575e+06	925568	816518	711545	1.05353e+06	1.00598e+06	1.06176e+06	-	-	-
Wbmp004660	balanophon n	2	Lignans and Coumarins	Lignans	C20H20O6	357.13	175.08	356.126	[M+H]+	2	-	-	45794.7	33659.3	11768.6	133828	146580	135727	102085	81558.2	89554.9	138972	216459	136333	49143.2	37623.6	62915.5	112916	63360.2	79004.4	-	-	-
Zmdn002400	Epicatechin-3'-O-β-D-glucopyranoside*	2	Flavonoids	Flavanols	C21H24O11	451.13	289.07	452.132	[M-H]-	2	-	-	28668.6	38080.7	61115.7	132752	128828	103923	116258	117861	107515	135251	155776	158970	86023.7	85278.2	105169	75791.8	105611	125290	-	-	-
HJN041	Epicatechin 3-glucoside*	2	Flavonoids	Flavanols	C21H24O11	451.12	289.07	452.132	[M-H]-	2	103303-00-0	-	36776	39040.9	44496	145197	136130	126912	93857.9	137679	130732	118881	160630	181952	74933.3	93311.1	65988	68600.5	122926	98954.5	-	-	-
Wdtp002760	γ-L-Glutamyl-L-[S-(4-hydroxyphenylbenzyl)]cysteine glycine	1	Amino acids and derivatives	Amino acids and derivatives	C17H23N3O7S	414.13	179.05	413.126	[M+H]+	1	-	-	1.34243e+07	1.78486e+07	1.32001e+07	5.54491e+06	3.23461e+06	4.00267e+06	7.59682e+06	9.44784e+06	5.90568e+06	3.05623e+06	3.039e+06	3.90535e+06	1.56436e+07	7.8505e+06	8.49147e+06	6.13309e+06	1.02365e+07	7.94019e+06	-	-	-
Sasp004188	Loliolide beta-D-glucopyranoside*	1	Terpenoids	Sesquiterpenoids	C17H26O8	359.17	197.12	358.163	[M+H]+	1	-	-	608917	742182	440286	1.32192e+06	999876	1.11996e+06	1.29585e+06	1.06746e+06	1.06427e+06	1.48126e+06	1.462e+06	1.42751e+06	868676	1.22996e+06	1.05093e+06	925581	878891	787190	-	-	-
pmp000570	Odoricarpan	1	Flavonoids	Isoflavones	C18H18O6	331.12	165.05	330.11	[M+H]+	3	-	-	570813	368166	414584	1.07835e+06	866399	774297	927465	799354	783688	964307	1.31272e+06	1.10871e+06	646466	760137	625816	812214	845691	794175	-	-	-
Layp006138	5-Hydroxy-3',4',7-trimethoxyflavone glucoside*	1	Flavonoids	Flavones	C24H26O11	491.16	329.1	490.147	[M+H]+	2	-	-	5262.95	5262.95	39947	65854.6	73361.1	26314.8	52907.2	38204.5	64275.3	91386.2	75314.7	73722.5	52287.2	50864.3	38920.3	55361	76119.5	85511	-	-	-
PDP172320	homoferreirin-7-O-glucoside-6''-malonate	1	Flavonoids	Isoflavones	C26H28O14	565.15	317.1	564.148	[M+H]+	3	-	-	40683.9	33425.1	33886.4	95749.2	99248.1	86781.5	59781.1	85143.4	66509.5	126987	127856	127559	56030.1	62323.7	61867.8	79122.7	74635	80645.6	-	-	-
Hmhp006830	6,8-Dihydroxy-2-(2-hydroxy-4-methoxybenzyl)-7-methyl-3,4-dihydronaphthalen-1(2H)-one	1	Flavonoids	Other Flavonoids	C18H18O6	331.11	137.06	330.11	[M+H]+	3	-	-	2401.02	2401.02	2401.02	36352.7	24165.8	20526.1	30169.7	41853.7	13366.2	28651.2	36276.4	49856.2	15138.5	12005.1	22896.4	26543.3	13094.3	33707.1	-	-	-
Wbwn009556	4-[4-(4-hydroxy-3-methoxyphenyl)-2,3-dimethylbutyl]-2-methoxyphenol	1	Lignans and Coumarins	Lignans	C20H26O4	329.17	314.15	330.183	[M-H]-	3	36469-60-0	-	231386	219605	172987	397190	366738	397255	338222	254182	321438	433140	393786	353786	269680	307948	297598	337519	374285	295752	-	-	-
Wcgn003981	Methyl 3-O-glucosyl-4-hydroxybenzoate*	1	Phenolic acids	Phenolic acids	C14H18O9	329.09	167.03	330.095	[M-H]-	1	155112-92-8	-	494312	459593	355730	963945	828139	763403	713629	718820	793423	999319	881349	889618	595799	527355	574457	605458	684995	567817	-	-	-
PDP035942	6-{[3,4-dihydroxy-6-(hydroxymethyl)-5-[(3,4,5-trihydroxy-6-methyloxan-2-yl)oxy]oxan-2-yl]oxy}-5-hydroxy-7-methoxy-2-(4-methoxyphenyl)-4H-chromen-4-one*	0	Flavonoids	Flavones	C29H34O15	623.2	315.09	622.19	[M+H]+	1	-	-	336277	295399	271113	858884	765496	798325	809538	960654	776079	1.45044e+06	1.43041e+06	1.46106e+06	720561	816549	797785	770710	783652	868392	-	-	-
Walp003622	6-beta-d-glucopyranosyloxyindole-3-carboxylic acid	0	Alkaloids	Plumerane	C15H17NO8	340.1	178.05	339.095	[M+H]+	2	-	-	1.00364e+06	590720	1.13456e+06	431728	396290	390081	700167	679593	837096	634938	525454	544848	673259	852921	829926	770310	735176	730287	-	-	-
pmb1178	O-Feruloyl 7-hydroxycoumarin*	0	Lignans and Coumarins	Coumarins	C19H14O6	339.09	177.05	338.079	[M+H]+	3	-	-	1.82639e+06	1.74762e+06	1.41342e+06	954665	974801	1.36048e+06	1.50752e+06	1.45518e+06	1.34893e+06	1.33075e+06	958039	1.05341e+06	1.28379e+06	1.4971e+06	1.3752e+06	1.26903e+06	1.48104e+06	1.18599e+06	-	-	-
PD0894179	3-O-Methylquercetin-3-O-(6''-malonyl)glucoside	0	Flavonoids	Flavonols	C25H24O15	565.12	317.07	564.111	[M+H]+	1	-	-	71982.7	133582	70551.4	233307	223128	229007	170682	175200	159493	251639	200467	214063	125664	91978.2	115165	144856	181928	210834	-	-	-
WapTKC024676	9-Hydroxy-4-Megastigmen-3-one O-(6-O-Malonyl-β-D-Glucopyranoside)	0	Terpenoids	Sesquiterpenoids	C22H34O10	459.22	211.17	458.215	[M+H]+	1	1007227-01-1	-	1.12908e+06	1.05158e+06	822206	612864	786151	830012	886707	861342	857196	623981	553244	644118	857711	798916	671502	857471	786756	778578	-	-	-
MW0108380	N-(1H-indol-3-ylacetyl)methionine	0	Amino acids and derivatives	Amino acids and derivatives	C15H18N2O3S	307.09	130.06	306.104	[M+H]+	3	101053-06-9	-	142072	139150	173171	120435	117993	88563.8	119764	134007	127079	116859	89121.5	113335	176927	155189	140297	172314	176389	121301	-	-	-
Lhfp110340	Eremofukinone	0	Terpenoids	Sesquiterpenoids	C15H24O	221.19	119.08	220.183	[M+H]+	2	-	-	113920	114578	108146	206087	227784	201095	170754	151617	144830	191057	155460	209713	174078	197187	183068	109149	182642	125148	-	-	-
WapTKC000413	Dictyterpenoid B*	0	Terpenoids	Ditepenoids	C20H28O2	301.22	131.09	300.209	[M+H]+	2	403805-74-3	-	147181	94434.5	80236.3	113399	136942	141081	105835	114340	140665	147223	95650.3	121677	86820.3	144697	106966	133448	126303	153953	-	-	-
Waptp08627	13,16-Docosadienamide	0	Lipids	Free fatty acids	C22H41NO	336.33	69.07	335.319	[M+H]+	2	-	-	185366	380754	222239	434958	230044	422138	221920	407983	360536	615988	432979	327934	440727	356313	177456	188402	185836	188246	-	-	-
WapTKC012009	13-Methyl-8,11,13-Podocarpatriene-2,19-diol	0	Terpenoids	Ditepenoids	C18H26O2	275.2	173.13	274.193	[M+H]+	1	2081951-14-4	-	168265	105860	58883.6	133919	138505	158561	121076	131160	161645	177306	143134	125220	107503	151861	101716	225653	168562	147232	-	-	-
PD0771234	4-[2-(3-hydroxy-3-methylbut-1-enyl)-3,6-dimethylphenyl]-2-methylbut-3-en-2-ol	0	Terpenoids	Sesquiterpenoids	C18H26O2	275.2	159.12	274.193	[M+H]+	1	-	-	147485	119569	83972.6	133156	151954	171426	100598	116287	172503	162285	122660	141152	122322	168712	87144.5	205964	234167	192390	-	-	-
MWStz627	Pectolinarigenin	0	Flavonoids	Flavones	C17H14O6	315.09	300.07	314.079	[M+H]+	2	520-12-7	C17784	498208	382403	428346	1.06138e+06	688866	851706	805888	662628	754586	775769	1.35144e+06	1.15706e+06	646950	639373	466332	951956	795356	602862	-	C17784	-
Wdjp011436	Blestriarene B	0	Others	Others	C30H24O6	481.16	257.08	480.157	[M+H]+	1	127211-03-4	C10248	252798	321256	276530	52599.7	39224.4	42690.8	155939	178050	156728	53230.7	54512	57351.8	245603	281345	221879	198963	218005	194061	-	C10248	MetMap162
Zbsp011292	Methyl [6]-Gingerdiol 3-acetate	0	Phenolic acids	Phenolic acids	C20H32O5	353.23	151.07	352.225	[M+H]+	3	-	-	95922.1	56524.2	32263.1	35274.5	40001.4	38249.2	54015.5	64550	31873	23751.3	25323.8	15520.7	38390.2	54704.8	48052.1	75388	51647.6	50434.4	-	-	-
Zmzp000145	N6,N6,N6-Trimethyl-L-lysine	0	Amino acids and derivatives	Amino acids and derivatives	C9H20N2O2	189.16	84.08	188.153	[M+H]+	1	23284-33-5	C03793	4.76085e+06	4.35185e+06	3.84695e+06	5.41526e+06	5.61844e+06	5.30572e+06	5.5268e+06	5.72291e+06	5.12759e+06	6.62972e+06	6.83035e+06	5.79094e+06	4.91932e+06	5.64996e+06	4.95823e+06	3.95688e+06	5.39175e+06	5.13615e+06	ko00310,ko01100	C03793	-
WapTKC002567	14,15-Dinor-13-Oxo-8(17)-Labden-19-Oic Acid	0	Terpenoids	Ditepenoids	C18H28O3	293.21	149.1	292.204	[M+H]+	2	64291-77-6	-	226864	162966	281506	266809	251320	295773	289599	176123	278407	400498	227525	286752	213137	295211	168584	239303	193075	237567	-	-	-
Salp010275	5-Hydroxy-8-methoxycalamenene	0	Terpenoids	Sesquiterpenoids	C16H24O2	249.18	193.12	248.178	[M+H]+	3	-	-	548765	560545	567290	532432	495018	538860	542448	537556	583816	542902	433306	552292	596667	489565	563296	265164	255551	290122	-	-	-
Hmjp000461	3-O-Glucoside-3-hydroxy-y-butyrolactone	0	Others	Lactones	C10H16O8	265.08	103.04	264.084	[M+H]+	1	-	-	5.2799e+06	5.3563e+06	6.24332e+06	9.04551e+06	1.07173e+07	9.02789e+06	7.19931e+06	8.41781e+06	8.1406e+06	8.74864e+06	1.26109e+07	6.98545e+06	8.12325e+06	8.53392e+06	8.77259e+06	1.02867e+07	9.10744e+06	6.75935e+06	-	-	-
MWS2910	5-Methyl-2'-deoxycytidine	0	Nucleotides and derivatives	Nucleotides and derivatives	C10H15N3O4	242.11	126.07	241.106	[M+H]+	3	838-07-3	C03592	176333	163651	183425	130758	121098	128771	105649	129407	143576	88829.6	77152.9	53021.3	96862.7	131768	107660	141672	101715	115769	-	C03592	-
Layp000971	Hydroxymenisdaurin D	0	Alkaloids	Alkaloids	C14H21NO8	332.13	152.07	331.127	[M+H]+	2	-	-	4.8419e+07	6.13568e+07	5.3911e+07	3.67845e+07	3.78235e+07	2.78816e+07	5.13345e+07	4.41368e+07	3.31376e+07	3.05926e+07	3.65445e+07	3.72771e+07	4.50901e+07	4.00407e+07	4.41293e+07	3.08423e+07	4.4975e+07	4.56384e+07	-	-	-
Lcfp121253	Phe-Val-Val	0	Amino acids and derivatives	Amino acids and derivatives	C19H29N3O4	364.22	120.08	363.216	[M+H]+	3	-	-	1.49315e+06	1.43932e+06	1.18623e+06	2.32384e+06	2.20419e+06	2.29444e+06	1.93077e+06	1.86522e+06	2.07077e+06	2.69662e+06	2.93845e+06	3.13904e+06	2.21424e+06	2.6283e+06	2.42694e+06	2.34399e+06	2.22528e+06	2.34241e+06	-	-	-
PDP060686	6-hydroxysphingosine*	0	Lipids	Sphingolipids	C18H37NO3	316.29	60.04	315.277	[M+H]+	1	-	-	3.8562e+06	3.88879e+06	2.39662e+06	4.81565e+06	4.77694e+06	4.72682e+06	4.55255e+06	4.60431e+06	3.99308e+06	6.22871e+06	6.04713e+06	6.5994e+06	4.82483e+06	5.10095e+06	4.89616e+06	4.1206e+06	4.48004e+06	4.27065e+06	-	-	-
Rfn07755	4,5-Dihydroxy-1,2-dimethoxy-7-methylanthracene-9,10-dione	0	Quinones	Anthraquinone	C17H14O6	315.08	300.06	314.079	[M+H]+	1	89701-79-1	-	383289	435973	337739	858718	666148	734591	670615	685626	669765	1.22512e+06	973412	1.2955e+06	807961	767264	510300	719028	751640	1.05177e+06	-	-	-
Hmdp009461	Shancidin	0	Quinones	PhenAnthraquinones	C21H18O3	319.13	107.05	318.126	[M+H]+	3	-	-	161074	144861	109963	215869	193236	220789	179697	165294	151721	207429	243740	253499	169626	190916	186007	178912	177883	197121	-	-	-
pmp001267	2-(Dodecylamino)-3-phenyl-1-propanol	0	Alkaloids	Alkaloids	C21H37NO	320.29	302.29	319.288	[M+H]+	2	-	-	212499	183373	163580	227146	255188	247686	186860	201385	193478	248603	290750	251145	185389	189129	190004	211998	204949	237662	-	-	-
mws1526	Sweroside	0	Terpenoids	Monoterpenoids	C16H22O9	359.13	197.08	358.126	[M+H]+	3	14215-86-2	C17071	1.72741e+06	1.40871e+06	1.45154e+06	3.29511e+06	3.81562e+06	2.88503e+06	2.69206e+06	3.26289e+06	3.19384e+06	3.68718e+06	4.63756e+06	3.71122e+06	2.35339e+06	3.77156e+06	3.21418e+06	2.75828e+06	2.66799e+06	2.39525e+06	-	C17071	-
PD0462863	2-aminooctadec-12-ene-1,3,4-triol*	0	Lipids	Sphingolipids	C18H37NO3	316.29	60.04	315.277	[M+H]+	1	-	-	5.37581e+06	5.24203e+06	4.06306e+06	7.88927e+06	7.08016e+06	7.95778e+06	7.35732e+06	7.29773e+06	7.53129e+06	9.44733e+06	9.86346e+06	1.01846e+07	8.11225e+06	8.11886e+06	7.61671e+06	7.5224e+06	7.91968e+06	7.16011e+06	-	-	-
MWS201054	O-Acetyl-L-homoserine	0	Amino acids and derivatives	Amino acids and derivatives	C6H11NO4	162.08	56.05	161.069	[M+H]+	3	250736-84-6	C01077	322938	321074	326834	257534	266818	215297	244471	283060	279890	165919	207223	237575	242240	232025	244040	228283	258064	272118	ko00270,ko01100	C01077	-
WaTKp02403	2-Phenylcycloprop-2-en-1-one	0	Others	Ketone compounds	C9H6O	131.05	103.05	130.042	[M+H]+	2	-	-	145528	125081	19130.6	177618	374082	437579	179924	135029	161951	281175	312324	301020	95652.9	332287	355694	315522	126919	327640	-	-	-
Jmzp008184	Rel-(8S,8'R)-Dimethyl-(7S,7'R)-bis(5-hydroxy-3-methoxyphenyl)tetrahydrofuran	0	Lignans and Coumarins	Lignans	C20H24O5	345.17	137.06	344.162	[M+H]+	3	-	-	140456	53939.1	143527	248920	184179	260815	126465	202435	231498	271354	240491	314509	228948	214534	207933	234627	207101	95895.8	-	-	-
Lmjp005871	Penduletin (5,4'-Dihydroxy-3,6,7-trimethoxyflavone)*	0	Flavonoids	Flavonols	C18H16O7	345.1	312.06	344.09	[M+H]+	1	569-80-2	-	5.55238e+06	5.67441e+06	4.6955e+06	9.61253e+06	8.48229e+06	8.18002e+06	8.515e+06	8.01912e+06	7.98989e+06	1.27919e+07	1.04091e+07	1.04603e+07	7.84552e+06	9.45776e+06	8.05977e+06	8.24591e+06	6.72723e+06	7.88538e+06	-	-	-
MWS0811	L-Pipecolate	0	Alkaloids	Piperidine alkaloids	C6H11NO2	130.09	84.08	129.079	[M+H]+	1	1723-00-8	C00408	7.48566e+06	8.09795e+06	6.02628e+06	1.65024e+06	1.25286e+06	1.99373e+06	1.7523e+06	1.44683e+06	1.02016e+07	1.76363e+06	1.75372e+06	2.2684e+06	7.83229e+06	6.46954e+06	6.26393e+06	3.82868e+06	4.33835e+06	5.37898e+06	ko00310,ko00960,ko01100,ko01110	C00408	-
Wahlp02378	5'-Hydroxy-N-methylcoclaurine Glucoside	0	Alkaloids	Isoquinoline alkaloids	C24H31NO9	478.21	316.15	477.199	[M+H]+	3	-	-	97120.3	102499	70520	154578	169133	196007	135515	117592	85440.5	117922	153616	175596	77656.9	90786	85909.1	136612	165976	160280	-	-	-
Wdjp009578	1,3,6-Tri(4-hydroxybenzyl)-4-methoxy-9,10-dihydrophenanthrene-2,7-diol	0	Others	Others	C36H32O6	561.23	107.05	560.22	[M+H]+	3	-	-	33586.7	21047.5	31896.4	10419.3	14824.8	11240.4	23670.6	30753.8	13192	13227.3	10783.8	11556.5	19801.5	22225	26608.7	27630.4	20860.9	37686.1	-	-	-
Lskp211213	Eurifoloid O	0	Terpenoids	Ditepenoids	C20H28O2	301.22	173.13	300.209	[M+H]+	2	-	-	72179.6	39452	63592.9	86072.8	60125.3	77905.8	65717.5	52369.8	85763.3	116352	75821.3	71745.9	43414.6	118074	65946.3	82221.7	92124.6	98878.7	-	-	-
Qmhp111704	Pittogoside B*	0	Lignans and Coumarins	Lignans	C26H32O11	521.2	131.05	520.194	[M+H]+	2	-	-	35359.9	33476.6	20613.6	68774.5	99948.8	76573.9	58363	61629.3	73735.3	76330.9	81590.9	125769	63739.8	53434.4	53557.9	80234	74403.9	64817.5	-	-	-
Hmbp001276	Gallacetophenone	0	Others	Ketone compounds	C8H8O4	169.05	65.03	168.042	[M+H]+	1	528-21-2	-	300353	270257	214288	347976	382469	575430	305433	326648	394873	557052	563275	468518	366982	342242	599879	565222	339226	593475	-	CM01681	MetMap164
Lmgp008943	3,5-Dihydroxy-7,3',4'-trimethoxyflavone	0	Flavonoids	Flavonols	C18H16O7	345.1	287.06	344.09	[M+H]+	1	6068-80-0	-	318466	278977	332936	521727	507021	579882	336888	473222	406637	611179	542283	426971	543930	599254	433084	638550	582264	581743	-	-	-
WapTKC209233	Agalleudesmanol H*	0	Terpenoids	Sesquiterpenoids	C15H26O2	239.2	95.08	238.193	[M+H]+	1	-	-	40281.6	13647.3	23528.1	52181	91361.1	62238.6	49461.9	47033.1	32643.9	54355.3	74046.1	66467	55476.1	63079.2	48960.6	47528.6	60470.7	58175.7	-	-	-
Hmhp005160	Rehderianin I*	0	Flavonoids	Flavones	C17H14O7	331.07	316.05	330.074	[M+H]+	1	90965-30-3	-	1.33163e+06	1.07373e+06	1.12065e+06	1.68228e+06	1.98535e+06	2.22224e+06	1.63289e+06	1.77297e+06	1.865e+06	2.47537e+06	2.27981e+06	2.11507e+06	1.93492e+06	2.29215e+06	1.84601e+06	2.14928e+06	2.14321e+06	2.2936e+06	-	-	-
pmp001270	LysoPC 16:1*	0	Lipids	LPC	C24H48NO7P	494.32	184.07	493.317	[M+H]+	3	76790-27-7	-	232470	424715	208635	125766	113954	140155	183587	188036	156945	74155.4	77507.2	84975.4	135801	113460	159551	210206	195592	255604	-	-	-
MW0156770	Ser-His-Asp	0	Amino acids and derivatives	Amino acids and derivatives	C13H19N5O7	358.14	272.14	357.128	[M+H]+	3	-	-	12441.2	22872.9	1872.48	28428.1	52809.2	26290.8	26680.4	38542.1	16104.1	27295.3	52718.8	53327.5	9362.39	32292.6	24873.4	34916.9	50158.9	24824.2	-	-	-
Lmjp008064	Nevadensin	0	Flavonoids	Flavones	C18H16O7	345.1	315.05	344.09	[M+H]+	2	10176-66-6	C10111	228461	220599	212366	215897	236737	579062	171081	312352	437345	349580	573851	397421	142020	352618	351091	586169	389126	585610	-	C10111	-
MWStz503	alpha-Chaconine	0	Alkaloids	Steroid alkaloids	C45H73NO14	852.51	852.53	851.503	[M+H]+	3	20562-03-2	C10796	473488	646995	650419	268235	206178	336724	469815	509045	414973	41235.6	41235.6	41235.6	385978	419763	575563	312885	381212	322760	-	C10796	-
PDP073410	10,13-dimethyl-3-oxo-1,2,8,9,11,12,14,15,16,17-decahydrocyclopenta[a]phenanthrene-16-carboxylic acid	0	Terpenoids	Ditepenoids	C20H26O3	315.2	269.19	314.188	[M+H]+	2	-	-	12058.2	12058.2	12058.2	112606	105348	160044	80097.3	60290.8	86667	172846	152002	99345.9	84912.5	110113	115534	91884.5	95785.1	116564	-	-	-
PDP018262	(2-aminoethoxy)[2-hydroxy-3-(octadeca-9,12,15-trienoyloxy)propoxy]phosphinic acid*	0	Lipids	LPE	C23H42NO7P	476.28	335.26	475.27	[M+H]+	1	-	-	236373	279595	230567	176279	181261	181713	185615	206285	151375	96389	93320.6	143704	189198	155218	167293	167549	221919	150780	-	-	-
mws4516	5-Oxo-D-proline	0	Amino acids and derivatives	Amino acids and derivatives	C5H7NO3	130.05	84.05	129.043	[M+H]+	3	4042-36-8	C02237	1.70474e+07	2.01351e+07	1.4815e+07	738908	738908	738908	3.69454e+06	4.76297e+06	3.39921e+07	738908	738908	738908	1.04554e+07	1.17876e+07	1.35509e+07	9.38552e+06	9.07716e+06	9.05583e+06	ko00470,ko01100	C02237	-
Sadp017169	Dinortrixagone	0	Terpenoids	Sesquiterpenoids	C18H28O	261.22	121.1	260.214	[M+H]+	1	-	-	102616	140673	99145.7	42441.4	44784.2	41662.2	58009.7	58180	82146.2	5162.75	5162.75	5162.75	25813.7	29509.8	46358.6	39241.9	68915.7	51098.9	-	-	-
Wdjp004614	2-(7-hydroxy-4-methoxyphenanthren-2-yl)oxy-6-(hydroxymethyl)oxane-3,4,5-triol	0	Others	Others	C21H22O8	403.14	167.07	402.132	[M+H]+	3	-	-	9285.78	23744	16922.2	1157	1157	1157	10119.4	5785.02	16028.5	1157	1157	1157	12089.5	15060.5	5991.2	14057.8	21997	32264.6	-	-	-
mws2184	Ethyl caffeate	0	Phenolic acids	Phenolic acids	C11H12O4	207.07	135.04	208.074	[M-H]-	3	102-37-4	-	49606.4	65634.9	47280	99240.5	106498	84485	70116.7	78502.3	75666.7	89261.3	87986	82493.5	81696.8	44257.4	44039.7	65339.3	84139.5	75439.8	-	CM02619	MetMap166,MetMap168,MetMap170
Safn010049	Apometzgerin	0	Flavonoids	Flavones	C17H14O7	329.07	271.02	330.074	[M-H]-	3	76900-87-3	-	162935	150685	125734	235396	285428	267826	241972	198512	230534	258124	348434	312242	211430	260656	234940	266999	276125	273361	-	-	-
MWSmce413	Anthraquinone-2-carboxylic acid	0	Quinones	Anthraquinone	C15H8O4	251.04	207.05	252.042	[M-H]-	3	117-78-2	-	56140	59883.3	73370.7	56777	65388.6	43316.5	58147.2	60546.6	54961.7	57810.5	44340.8	61783.8	58034.3	52037.1	66355	28042.1	27650.5	18465.6	-	-	-
pmb2620	3,4-Dimethoxycinnamic acid*	0	Phenolic acids	Phenolic acids	C11H12O4	207.07	133.07	208.074	[M-H]-	3	2316-26-9	-	172797	174060	149009	100632	111657	102621	114922	123053	120213	45045.2	62823.5	54087.5	87031.8	87428.2	95056.9	118520	120507	124313	-	-	-
Zbdn007423	6,7-Dimethoxy-4-chromanone	0	Flavonoids	Other Flavonoids	C11H12O4	207.07	192.04	208.074	[M-H]-	3	54013-49-9	-	105049	99582	77729.1	65245.9	64007	56905.8	63596.4	65172	59754.7	31911.3	26512.9	30408	58144.4	45478.6	52305	67830.7	59550.8	54629.3	-	-	-
Zbn010259	1,5,7-trihydroxy-6-methoxy-2-methoxymethylanthraquinone	0	Quinones	Anthraquinone	C17H14O7	329.07	314.05	330.074	[M-H]-	3	-	-	273685	235988	192755	398252	358935	416333	294582	358161	345504	381127	489362	465940	351553	333466	365037	366115	382215	346630	-	-	-
ZBN0061	Quercetin-3',4'-dimethyl ether*	0	Flavonoids	Flavonols	C17H14O7	329.07	314.06	330.074	[M-H]-	3	3306-29-4	-	199467	188606	177904	334504	348263	384961	223799	314285	295607	348518	322866	354215	285412	346719	280544	307973	374581	397495	-	-	-
mws0628	4-Hydroxybenzaldehyde	0	Others	Aldehyde compounds	C7H6O2	121.03	92.03	122.037	[M-H]-	1	123-08-0	C00633	1.66204e+06	1.99338e+06	1.77348e+06	1.19002e+06	1.20994e+06	1.14649e+06	1.42081e+06	1.71576e+06	1.24483e+06	1.17861e+06	972457	1.17027e+06	1.15799e+06	1.22051e+06	1.24782e+06	1.44837e+06	1.33401e+06	1.43301e+06	ko01100	C00633	MetMap163,MetMap164
MWS2442	D-Fructose 6-phosphate*	0	Others	Saccharides	C6H13O9P	259.02	96.97	260.03	[M-H]-	1	643-13-0	C00085	971653	1.09384e+06	997739	781410	764296	680626	848441	848102	782899	665763	746344	714968	801113	668334	722637	922322	841724	983945	ko00010,ko00030,ko00051,ko00052,ko00500,ko00520,ko00710,ko01100,ko01110,ko01200,ko01230,ko01240,ko01250	C00085	-
MWSmce083	Ferulic acid methyl ester*	0	Phenolic acids	Phenolic acids	C11H12O4	207.07	133.03	208.074	[M-H]-	3	22329-76-6	-	384399	344078	329235	218930	224404	246492	249017	264419	248559	123492	112190	127745	210527	202881	215197	253818	256305	243731	-	-	-
ZBN0264	Tricin-4'-O-syringylglyceryl ether-7-O-glucoside*	0	Flavonoids	Flavones	C34H38O17	717.2	329.07	718.211	[M-H]-	3	-	-	430277	435743	384517	895873	870828	813218	623301	630159	640807	1.00255e+06	978452	964614	662822	861703	873133	752655	759266	749916	-	-	-
pmf0250	gamma-Tocotrienol	0	Others	Vitamin	C28H42O2	409.31	391.3	410.318	[M-H]-	3	14101-61-2	C14155	194039	190613	213692	225314	213241	203770	206672	179127	215648	254367	205622	193982	194121	222872	205902	191006	218136	193869	ko00130,ko01100,ko01110	C14155	-
MWStz631	(-)-Pinoresinol glucoside	0	Lignans and Coumarins	Lignans	C26H32O11	519.19	357.14	520.194	[M-H]-	3	41607-20-9	C17529	59312.9	61520.1	64007.7	212518	263922	243051	122278	114467	141483	241041	274394	275432	58096.5	75120.7	57599.5	131170	149293	132768	-	C17529	-
Lmgn003755	5,7-Dihydroxy-2'-methoxy-3',4'-methyleneoxydihydroisoflavone	0	Flavonoids	Isoflavones	C17H14O7	329.07	299.02	330.074	[M-H]-	3	-	-	336069	243888	294746	475417	517793	547490	443313	408517	430398	571448	562611	535567	444203	556417	403068	533077	516434	499537	-	-	-
Yajn003638	Lamiol	0	Terpenoids	Monoterpenoids	C16H26O10	377.14	197.08	378.153	[M-H]-	3	-	-	69301.6	77985.9	70370.9	117258	135164	136133	99476.3	120265	99499.8	158354	162799	159460	96331.7	59602.2	58112.6	97691.3	111628	90366	-	-	-
Lmbn001181	Fraxetin-7,8-di-O-glucoside	0	Lignans and Coumarins	Coumarins	C22H28O15	531.14	531.13	532.143	[M-H]-	3	-	-	120560	121737	105182	168528	134536	144658	139919	148710	126760	163456	162503	183716	126706	148205	119291	141661	137412	138430	-	-	-
Zbfn008708	1-O-Linoleoyl-(6-O-Hydroxyethyl-D-Glucose)	0	Lipids	Free fatty acids	C26H46O9	501.31	279.23	502.314	[M-H]-	2	-	-	9247.37	8018.29	14057.3	3676.45	2993.86	2674.16	6715.14	8045.35	7427.27	2757.24	3318.28	1357.34	3639.54	2832.45	4067.22	7469.44	7573.23	8528.06	-	-	-
Lmjn007168	Quercetin-3,3'-dimethyl ether	0	Flavonoids	Flavonols	C17H14O7	329.07	271.03	330.074	[M-H]-	3	4382-17-6	-	64802	77815.2	65781.2	129384	153474	129346	102499	81991.2	105462	119126	137382	136457	106729	139238	104114	142935	139826	101799	-	CM00552	MetMap116,MetMap117
Zjbn102517	3-hydroxy-5,3'-dimethoxybibenzyl	0	Others	Stilbene	C16H18O3	257.12	242.09	258.126	[M-H]-	1	-	-	94863.8	90152.2	97232.3	165835	179259	177674	132361	149517	124661	191619	172762	189397	163389	161743	136640	172208	173853	148918	-	-	-
Wasyqn2926	3-O-Feruloyl Octose*	0	Phenolic acids	Phenolic acids	C18H24O11	415.12	193.05	416.132	[M-H]-	1	-	-	23252.4	19613.4	28818	66412.6	60052.8	55929	34960.8	32288.5	38748.8	69353.8	58229.5	75246.1	14472.9	22707.5	14180.6	46259.2	18882	36366.7	-	-	-
Yyyn008289	5,3'-Dihydroxy-7,4'-Dimethoxyflavone	0	Flavonoids	Flavones	C17H14O6	313.07	298.05	314.079	[M-H]-	2	32174-62-2	-	124687	119554	100231	172725	193750	171749	149491	175289	156068	212024	201837	221555	173944	174179	165366	180489	169494	162186	-	-	-
Zbn009444	Anthragallol 2-Methyl Ether; 1,3-Dihydroxy-2-methoxyanthraquinone	0	Quinones	Anthraquinone	C15H10O5	269.05	254.02	270.054	[M-H]-	3	10383-63-8	-	28685.4	31766.9	29383	37990.6	44914.4	50860.7	56367.5	40552	36330.9	54916.9	65709.2	56525.8	40696.2	49241.5	41293.6	45944.8	51987.4	61355	-	-	-
Zjbn102547	2,7-Dihydroxy-1-(p-hydroxybenzyl)-4-methoxy-9,10-dihydrophenanthrene-4'-O-glucose	0	Others	Others	C28H30O9	509.18	347.13	510.189	[M-H]-	3	-	-	29393.6	28044.2	23577	38958.9	38284.4	29489	33584.6	33507.7	33813.5	38346.4	40922.6	43661.3	31788.9	33831.4	33062	30818.9	26806.5	28648.6	-	-	-
Lmsn002887	1-O-Caffeoyl-β-D-xylose	0	Phenolic acids	Phenolic acids	C14H16O8	311.08	163.04	312.084	[M-H]-	2	-	-	1887.06	1887.06	1887.06	9435.28	23482.5	28798.5	24928.4	20320.9	20439.6	37958	56038.2	35036.6	32690.4	31374.7	20861.4	27358.9	18585.2	17031.3	-	CM02644	MetMap168
pme3351	L-2-Aminoadipate 6-semialdehyde	0	Amino acids and derivatives	Amino acids and derivatives	C6H11NO3	144.07	126.06	145.074	[M-H]-	3	1962-83-0	C04076	19203	26839.5	20149.2	16179.9	14418.8	11156.8	15911.6	25828.3	15720.1	17845.6	11921.2	10844.9	19083.6	22059.5	21816.3	15471.8	15769.3	14999.6	ko00300,ko00310,ko00960,ko01100,ko01110,ko01230	C04076	-
mws0917	3,7-Di-O-methylquercetin*	0	Flavonoids	Flavonols	C17H14O7	329.07	314.04	330.074	[M-H]-	3	2068-02-2	C01265	299873	286149	247573	548305	531558	518880	394621	420656	366116	598745	509542	453992	463903	544739	384579	505377	543760	481810	ko00944,ko01110	C01265	MetMap117

## Sheet: Magenta
nodeName	Compounds	degree	ClassⅠ	ClassⅡ	Formula	Q1 (Da)	Q3 (Da)	Molecular weight (Da)	Ionization model	Level	CAS	cpd_ID	120DAI_1	120DAI_2	120DAI_3	180DAI_1	180DAI_2	180DAI_3	240DAI_1	240DAI_2	240DAI_3	300DAI_1	300DAI_2	300DAI_3	360DAI_1	360DAI_2	360DAI_3	QC01	QC02	QC03	kegg_map	mw_cpd_ID	mw_map
WaYn011395	2-(2,3-dihydroxypropoxy)-3-(((2-(dimethylamino)ethoxy)(hydroxy)phosphoryl)oxy)propan-2-yl (Z)-14-Octadecenoic Acid	22	Lipids	LPE	C28H56NO9P	580.36	281.25	581.369	[M-H]-	1	-	-	264562	240043	239563	130324	130069	135070	194367	221928	198264	101879	105284	97576.9	162762	170467	165672	205542	226912	192097	-	-	-
Waln011704	1-(2,3-dihydroxypropoxy)-3-(((2-(dimethylamino)ethoxy)(hydroxy)phosphoryl)oxy)propan-2-yl (Z)-14-Octadecenoic Acid	18	Lipids	LPE	C28H56NO9P	580.36	281.25	581.369	[M-H]-	1	-	-	280458	241410	237097	134756	144570	126384	213839	221627	223047	102250	105934	114726	175598	196277	170317	196321	208863	219315	-	-	-
Walbn08698	3-(((2-(dimethylamino)ethoxy)(hydroxy)phosphoryl)oxy)-2-hydroxypropyl oleate*	18	Lipids	LPE	C25H50NO7P	506.32	281.25	507.332	[M-H]-	1	-	-	226821	224855	199479	125154	101556	107519	185165	183302	179281	81049.9	86850	74133.5	120511	155994	137141	162583	177357	167959	-	-	-
Safp021800	LPC(18:1/0:0)	16	Lipids	LPC	C26H53NO7P+	522.35	184.08	522.356	[M]+	1	3542-29-8	-	1.11946e+07	1.14163e+07	1.07204e+07	6.42613e+06	6.34104e+06	6.27855e+06	8.54877e+06	1.06716e+07	9.45069e+06	4.85099e+06	5.00068e+06	4.54226e+06	7.704e+06	8.83592e+06	8.05548e+06	9.6682e+06	1.0084e+07	9.88777e+06	-	-	-
PDP239506	Phosphatidylcholine lyso 18:1*	13	Lipids	LPC	C26H52NO7P	522.36	184.07	521.348	[M+H]+	1	-	-	1.08659e+07	1.19098e+07	1.04916e+07	6.71894e+06	6.05829e+06	5.88881e+06	8.83593e+06	1.10317e+07	9.50946e+06	5.0931e+06	4.89867e+06	5.02588e+06	7.96145e+06	9.10877e+06	8.22978e+06	9.55319e+06	9.65238e+06	9.73269e+06	-	-	-
ZBN0265	Tricin-4'-O-syringylglyceryl ether-5-O-glucoside*	12	Flavonoids	Flavones	C34H38O17	717.2	329.07	718.211	[M-H]-	3	-	-	401003	416335	336228	785654	825637	842133	518010	565142	618467	983818	938508	967473	701857	748054	707929	749795	652368	806218	-	-	-
Lmhp010190	LysoPC 18:1(2n isomer)*	10	Lipids	LPC	C26H52NO7P	522.36	184.07	521.348	[M+H]+	1	-	-	1.13181e+07	1.24e+07	1.04433e+07	6.09916e+06	6.67057e+06	6.44554e+06	8.50905e+06	1.07378e+07	9.72273e+06	4.94304e+06	4.87277e+06	4.36984e+06	8.25463e+06	9.49849e+06	8.28335e+06	9.42367e+06	9.73289e+06	1.00019e+07	-	-	-
Hasp010605	MG(18:3(9Z,12Z,15Z)/0:0/0:0)*	10	Lipids	Glycerol ester	C21H36O4	353.27	261.22	352.261	[M+H]+	1	129828-41-7	-	1.86465e+06	1.65451e+06	1.351e+06	690099	771903	608939	1.52051e+06	1.35608e+06	1.48938e+06	428506	469553	433188	751245	803124	918763	1.27748e+06	1.1641e+06	1.22198e+06	-	-	-
Wbkp008219	(3S,3'S)-N,N'-((1R,2R)-5-((3,4,5-trihydroxy-6-methyltetrahydro-2H-pyran-2-yl)oxy)cyclohex-3-ene-1,2-diyl)bis(2-methyl-2,3,4,9-tetrahydro-1H-pyrido[3,4-b]indole-3-carboxamide)	9	Alkaloids	Alkaloids	C38H46N6O7	699.36	699.36	698.343	[M+H]+	1	-	-	1.3304e+06	1.26716e+06	1.01978e+06	576763	654757	583937	1.05748e+06	1.44689e+06	1.21441e+06	584844	566785	499155	693614	851211	978527	1.09132e+06	1.11931e+06	842658	-	-	-
Safn011471	2-hydroxy-3-{[3,4,5-trihydroxy-6-(hydroxymethyl)oxan-2-yl]oxy}propyl octadeca-9,12,15-trienoate	9	Lipids	Free fatty acids	C27H46O9	573.33	277.22	514.314	[M+CH3COOH-H]-	1	-	-	3.55377e+06	2.64182e+06	2.57476e+06	1.37982e+06	1.12961e+06	1.16956e+06	3.00978e+06	2.96185e+06	2.63252e+06	974929	912779	991991	1.32968e+06	1.78695e+06	1.46644e+06	2.67482e+06	2.39103e+06	2.13775e+06	-	-	-
PDP193819	methyl 9-hydroxy-1-(5-hydroxy-6-methylheptan-2-yl)-4-methylspiro[4.5]dec-7-ene-8-carboxylate	8	Terpenoids	Sesquiterpenoids	C21H36O4	353.27	261.22	352.261	[M+H]+	2	-	-	2.00763e+06	1.76925e+06	1.62973e+06	732258	839291	673532	1.84674e+06	1.47383e+06	1.54826e+06	491001	555413	513950	876831	968134	822281	1.37963e+06	1.14374e+06	1.24781e+06	-	-	-
Wbmp010544	10-Hydroxymethyllycaconitine	7	Alkaloids	Alkaloids	C37H50N2O11	699.35	699.35	698.341	[M+H]+	2	-	-	1.20891e+06	1.2694e+06	1.07701e+06	647143	621047	637679	1.00358e+06	1.60819e+06	1.09678e+06	542008	490754	499472	689990	897399	784942	1.07477e+06	1.22844e+06	914982	-	-	-
Safn012431	[(2R)-2-(8-carboxyoctanoyloxy)-3-hexadecanoyloxypropyl] 2-(trimethylazaniumyl)ethyl phosphate	7	Lipids	LPC	C33H64NO10P	664.42	201.11	665.427	[M-H]-	1	117746-89-1	-	42818.6	38924.7	35462.3	59896	64707.3	62969.1	38388.3	41931	44222.4	64711.8	71119.6	67091.9	48144.5	56759.3	49734.5	51901.4	55916.1	49899.6	-	-	-
Qmxp101530	Inflexarabdonin J	6	Terpenoids	Ditepenoids	C20H30O3	319.23	255.21	318.219	[M+H]+	3	-	-	714390	765513	714117	1.03303e+06	1.01435e+06	1.05948e+06	804040	786844	883068	1.16525e+06	1.11984e+06	1.19454e+06	850043	913526	921134	821175	940939	965461	-	-	-
WapTKC044675	3,8-dimethyl-5-(prop-1-en-2-yl)-1,2,4a,7,8,8a-hexahydronaphthalen-2-yl acetate	6	Terpenoids	Sesquiterpenoids	C17H24O2	261.18	145.1	260.178	[M+H]+	3	67604-07-3	-	49336.8	79816.9	58669.9	6127.26	6127.26	6127.26	62219.2	70082.5	62049.9	6127.26	6127.26	6127.26	31778.5	58253.9	30636.3	59559.3	53338.5	81922.2	-	-	-
MWStz396	Gingerglycolipid A	6	Lipids	Glycerol ester	C33H56O14	675.36	397.13	676.367	[M-H]-	1	145937-22-0	-	392149	393771	258716	158608	141885	130345	261526	357488	314110	139106	136270	136507	269432	253796	303337	346859	350100	328518	-	-	-
Waptn05947	DGMG 18:3*	6	Lipids	Glycerol ester	C33H56O14	735.38	397.13	676.367	[M+CH3COO]-	1	-	-	192836	181414	123578	77746.9	87362.5	83564.9	168912	190813	201099	76376.1	67504	68773.7	94050.3	123655	97713.9	174107	144506	147557	-	-	-
Safp023654	PAz-PC	4	Lipids	LPC	C33H64NO10P	666.43	184.07	665.427	[M+H]+	1	117205-52-4	-	2.11493e+06	2.06495e+06	1.65182e+06	2.97928e+06	3.10166e+06	3.12643e+06	2.14526e+06	2.18255e+06	2.13072e+06	3.12866e+06	3.47494e+06	3.29404e+06	2.79939e+06	2.90477e+06	2.58803e+06	2.42896e+06	2.34414e+06	2.65812e+06	-	-	-
Walbn08556	1-(((2-(dimethylamino)ethoxy)(hydroxy)phosphoryl)oxy)-3-hydroxypropan-2-yl oleate*	4	Lipids	LPE	C25H50NO7P	506.32	281.25	507.332	[M-H]-	1	-	-	178862	165796	176706	103837	121240	100039	199680	173156	179234	85956.2	71795.6	90729.2	129128	155275	108856	145626	163863	153365	-	-	-
Waptn06085	DGMG 18:3(2n isomer)*	4	Lipids	Glycerol ester	C33H56O14	735.38	397.13	676.367	[M+CH3COO]-	1	-	-	206696	219018	133468	73758.8	90203.7	89790.4	190148	206744	162093	87658.9	79728.4	95501.3	118694	108818	131969	168094	155212	157673	-	-	-
Zbln009453	cirrhopetalin	3	Quinones	PhenAnthraquinones	C16H14O4	269.08	226.07	270.089	[M-H]-	3	-	-	27629.6	21273.2	24224.7	39250.3	40748.5	49191.1	25345.3	21484.1	28982.4	35855.3	54620.9	48412.1	29163.4	30471.5	41279.5	38723.4	39677.5	41212.8	-	-	-
Lmhp009773	1-α-Linolenoyl-glycerol-3-O-glucoside*	1	Lipids	Glycerol ester	C27H46O9	515.32	261.22	514.314	[M+H]+	1	-	-	78059.9	65528.5	56148.8	22464.8	18736.8	20491.2	45965.6	51713.1	45661	24247	19758.5	22905.2	36780.4	54755.2	34953.9	56044.5	44123.9	37322.5	-	-	-
Waqkp06484	1-Linolenoylglycerol*	1	Lipids	Glycerol ester	C21H36O4	353.27	261.22	352.261	[M+H]+	1	-	-	560450	588509	365015	205659	186205	181451	400485	322180	350835	112405	106926	119081	337972	278533	243113	426619	396165	418066	-	-	-
PDP007971	Dracunculifoside E:(-)-Dracunculifoside E	0	Phenolic acids	Phenolic acids	C18H24O10	401.14	163.04	400.137	[M+H]+	3	388077-48-3	-	412759	342255	348998	170058	215158	187555	315813	342058	329914	230294	227465	255146	391521	256605	243600	250387	361063	280169	-	-	-
WapTKC136600	(-)-2-Acetoxyamorpha-4,7(11)-Diene	0	Terpenoids	Sesquiterpenoids	C17H26O2	263.2	119.09	262.193	[M+H]+	3	-	-	290968	222588	183425	207917	205937	212021	220007	279721	254439	196830	183318	188106	196647	224413	202756	270851	305981	288087	-	-	-
Rlp04370	10-hydroxy-2,5-dimethyl-8-{[3,4,5-trihydroxy-6-(hydroxymethyl)oxan-2-yl]oxy}-2H,3H,4H-naphtho[1,2-b]pyran-4-one	0	Others	Chromone	C21H24O9	421.15	259.1	420.142	[M+H]+	1	-	-	7.81732e+06	7.39095e+06	7.27369e+06	1.75195e+06	1.50464e+06	1.48992e+06	6.57425e+06	6.23597e+06	5.46266e+06	3.6536e+06	3.4222e+06	3.68717e+06	3.96233e+06	2.88352e+06	3.5384e+06	6.19946e+06	4.45751e+06	5.74803e+06	-	-	-
WapTKC012013	Eperuol*	0	Terpenoids	Ditepenoids	C18H30O	263.24	81.07	262.23	[M+H]+	1	87553-46-6	-	853404	663840	649956	498832	669564	470974	696932	708281	631326	242003	266221	242280	307345	480422	419263	539539	569405	512601	-	-	-
Waqkp07331	1-g-Linoleoyl-glycerol*	0	Lipids	Glycerol ester	C21H38O4	355.29	263.24	354.277	[M+H]+	1	-	-	716829	602400	516306	436455	432442	424505	621800	611617	597421	185705	197013	173049	322981	353819	298081	510163	477446	490182	-	-	-
PDP188657	2-(4-Hydroxyphenyl)propanoic acid	0	Phenolic acids	Phenolic acids	C9H10O3	167.07	121.06	166.063	[M+H]+	1	938-96-5	-	182362	136015	148899	143227	135702	141171	171630	161646	146822	147968	132508	151241	157236	140027	142850	137703	169189	150118	-	-	-
Yamp012546	(6S,6aS)-9,11-diphenoxy-6,6a-diphenyl-2,3,5,5a,6,6a,11b,11c,12,12a-decahydro-1H-benzofuro[2',3':4,5]cyclopenta[1,2-d]pyrrolo[1,2-a]pyrimidin-5-ol	0	Alkaloids	Alkaloids	C40H36N2O4	609.27	591.26	608.268	[M+H]+	2	-	-	274043	154234	153659	114947	129021	130906	123660	187221	460823	221423	112443	61400.4	130412	334362	96163.9	652223	730242	763029	-	-	-
Zbsp010780	Methyl [6]-Gingerdiol 5-acetate	0	Phenolic acids	Phenolic acids	C20H32O5	353.23	151.08	352.225	[M+H]+	3	-	-	115499	92205.9	85977	37173.1	30169.8	42592.4	74161.8	96853.7	69872.3	38726.7	32002.9	40773.2	42430.6	35721.7	47542.4	84225.5	63015.5	73612.6	-	-	-
Waqkp05977	2-g-linolenoyl-glycerol	0	Lipids	Glycerol ester	C21H36O4	353.27	261.22	352.261	[M+H]+	1	-	-	447180	384780	256838	133886	175813	168774	285641	407428	326614	164932	176080	155915	201960	183170	178120	274502	300779	277125	-	-	-
pmb0782	Piperidine	0	Alkaloids	Piperidine alkaloids	C5H11N	86.1	69.07	85.0891	[M+H]+	3	110-89-4	C01746	984097	1.0188e+06	729505	859841	905013	757960	1.10085e+06	971181	861829	850937	763590	819207	902940	768790	771840	721380	1.1941e+06	826420	ko00960	C01746	-
WapTKC039828	8α-Acetoxy-α-Gurjunene	0	Terpenoids	Sesquiterpenoids	C17H26O2	263.2	147.12	262.193	[M+H]+	3	70224-46-3	-	103369	97268.2	118196	108981	62495.8	74955.1	131929	122584	102008	59987.6	42182.8	65431.6	90585.5	96074.1	55436.8	101658	99290.3	104055	-	-	-
PDP240682	Levofolinic acid*	0	Alkaloids	Alkaloids	C20H23N7O7	474.18	327.12	473.166	[M+H]+	1	-	-	1.29174e+06	1.47397e+06	1.08688e+06	1.48749e+06	1.79167e+06	1.90463e+06	1.41841e+06	1.41611e+06	1.41434e+06	2.07982e+06	2.05694e+06	2.17835e+06	1.75695e+06	1.77999e+06	1.97907e+06	1.51994e+06	1.40727e+06	1.74195e+06	-	-	-
Waqkp07598	2-g-Linoleoyl-glycerol*	0	Lipids	Glycerol ester	C21H38O4	355.29	263.24	354.277	[M+H]+	1	-	-	729359	718962	599619	481679	431138	396306	654920	620331	555336	208527	213542	183557	280487	345647	332812	544051	568598	474129	-	-	-
WapTKC007153	Grayanotoxin XIX	0	Terpenoids	Ditepenoids	C20H30O3	319.23	283.21	318.219	[M+H]+	3	75829-08-2	-	4.89435e+06	4.60157e+06	3.97916e+06	6.31382e+06	5.69463e+06	6.30673e+06	4.55781e+06	4.3005e+06	4.91869e+06	6.25369e+06	6.4019e+06	6.80817e+06	4.75641e+06	4.72742e+06	4.91548e+06	4.88219e+06	5.58605e+06	5.21359e+06	-	-	-
Cmyp005063	Grandidentatin	0	Phenolic acids	Phenolic acids	C21H28O9	425.18	147.04	424.173	[M+H]+	3	15732-48-6	C10463	165798	216130	188769	181035	162111	171286	179370	198123	186195	109455	130498	130194	127932	164752	148205	225660	213310	162983	-	C10463	-
Lahp005848	pithecellobiumol B	0	Others	Chromone	C10H10O4	195.06	163.04	194.058	[M+H]+	3	-	-	617613	657484	677817	665393	700854	764017	649152	669354	623386	710015	628440	774771	630240	703285	701690	401695	404101	394470	-	-	-
Rfn02664	2-Oxo-2H-indole-3-acetic acid*	0	Alkaloids	Alkaloids	C10H7NO3	190.05	144.04	189.043	[M+H]+	3	-	-	828457	738262	664514	692740	592349	618832	867332	825817	1.01083e+06	531123	558341	579710	803941	760005	823558	818410	673715	805892	-	-	-
MWSmce118	Imidazole-4-acetate*	0	Alkaloids	Alkaloids	C5H6N2O2	127.05	81.04	126.043	[M+H]+	3	645-65-8	C02835	1.74708e+06	1.54291e+06	1.99124e+06	1.53365e+06	1.24731e+06	1.18959e+06	1.87439e+06	1.61473e+06	1.49735e+06	1.01328e+06	1.34681e+06	1.1469e+06	1.16677e+06	1.2959e+06	1.34949e+06	1.45833e+06	1.42457e+06	1.17001e+06	ko00340,ko01100	C02835	-
Wdyp002741	(1r)-1-[(4-hydroxyphenyl)methyl]-7-methoxy-2-methyl-3,4-dihydro-1h-isoquinolin-8-ol*	0	Alkaloids	Isoquinoline alkaloids	C18H21NO3	300.16	107.05	299.152	[M+H]+	3	-	-	142677	140599	117365	38508.2	49426.9	27029.7	166502	145983	94798.8	34124.3	54369.1	33792.4	103662	108238	110560	71717.9	85334.2	65053.7	-	-	-
Rfn02084	5'-O-methyladenosine*	0	Nucleotides and derivatives	Nucleotides and derivatives	C11H15N5O4	282.12	136.06	281.112	[M+H]+	3	139468-46-5	-	177712	140390	103315	113069	66530	137285	123567	142801	141570	105665	107115	147187	132059	117205	132087	168566	173218	130287	-	-	-
Jmwp003339	2-Phenylethy-1-O-β-D-glucoside	0	Others	Alcohol compounds	C14H20O6	285.13	123.04	284.126	[M+H]+	3	18997-54-1	-	63546.8	65810	45953.3	93768.1	145725	163464	74628.7	51544.6	53496.7	84214.7	118222	96703.9	68683.8	119058	103377	74830.5	59674.9	83868	-	CM02879	MetMap172
Zbqp000710	3-(1H-imidazol-5-yl)-2-(trimethylammonio)propanoate	0	Alkaloids	Alkaloids	C9H15N3O2	198.12	154.13	197.116	[M+H]+	3	-	-	19107.3	23588.3	23174.2	38605.9	45215.9	43513.3	32623.7	18856.8	13556.2	31571.4	29849.5	42522.3	26363.2	37842.6	28655.8	15281.4	30679.2	31599.6	-	-	-
Wdyp002448	1-[(4-hydroxyphenyl)methyl]-6-methoxy-2-methyl-3,4-dihydro-1h-isoquinolin-7-ol*	0	Alkaloids	Isoquinoline alkaloids	C18H21NO3	300.16	107.12	299.152	[M+H]+	3	-	-	85059	123998	96836.5	21337.6	56160.6	41608.8	111296	142685	101507	42551.1	33277.6	34029.5	110040	78113.5	127278	111420	98800.5	128944	-	-	-
Lazn001439	(3R,4S,5S,6R)-2-[9-[(2R,3R,4S,5R)-3,4-dihydroxy-5-(hydroxymethyl)oxolan-2-yl]-6-iminopurin-3-yl]-6-(hydroxymethyl)oxane-3,4,5-triol	0	Alkaloids	Alkaloids	C16H23N5O9	430.16	298.11	429.15	[M+H]+	2	-	-	52145	43083.5	39423.5	66351	62957.8	52575.3	43960.6	34950.8	50396.2	59830.8	61289.7	71211	46930.2	43742.3	66734.3	53967.4	56858.5	49122.3	-	-	-
Lskp211411	abutasterone*	0	Steroids	Steroid	C27H44O8	497.31	335.26	496.304	[M+H]+	1	88669-02-7	-	145582	223088	146528	74740.8	50960.5	62468.4	124804	132912	199072	136078	52246	51622.6	98386.1	92877.7	66760.1	100849	125561	116649	-	-	-
mws2628	4-Methylaminobutyrate	0	Organic acids	Organic acids	C5H11NO2	118.09	87.05	117.079	[M+H]+	3	1119-48-8	C15987	12271.5	3359.16	8594.8	12630.6	23938.2	20459.5	14720	3478.46	13809	27767.4	9594	17739.7	12720.8	8700.07	13468.3	7890.2	17489.5	11309.6	ko00760,ko01100	C15987	-
MWStz248	Laurolitsine	0	Alkaloids	Aporphine alkaloids	C18H19NO4	314.14	237.1	313.131	[M+H]+	3	5890-18-6	C16984	37732.6	47081.2	39025.1	13639.4	24761.6	16118.3	56892.6	49495.4	34701.8	26033.2	11746.4	10013.6	21031.2	12365.8	40235.2	37856.1	23594.4	47017.6	-	C16984	-
Sazp010264	Monogalactosyldiacylglycerol	0	Lipids	Glycerol ester	C45H70O10	771.5	609.45	770.497	[M+H]+	3	-	-	39680.3	45490.6	39542.4	26966.4	21458	26637.6	47405	47126.4	55681.1	22434.2	18624.4	23485.8	37763.5	47548.6	35883.1	67086.5	59095.1	69519.3	-	-	-
Lmhp008513	2-α-Linolenoyl-glycerol-1,3-di-O-glucoside*	0	Lipids	Glycerol ester	C33H56O14	677.37	261.22	676.367	[M+H]+	1	-	-	22095.8	41146.8	20412.9	14831.2	14817.1	7690.74	21839.2	24754.6	19363.9	1538.15	1538.15	1538.15	13247.7	22148.4	14935.5	28006.8	18706.1	29942.9	-	-	-
pme0120	5-Aminopentanoate	0	Organic acids	Organic acids	C5H11NO2	118.09	101.06	117.079	[M+H]+	3	660-88-8	C00431	50609.2	54597.1	26549	22231.5	28302.2	22711.6	40911.1	37821.2	34381	26676.2	26946.6	24442.6	16002.2	52010	18021.1	26696.1	26743.4	54362	ko00310,ko00330,ko00470,ko01100	C00431	-
Rfp03650	6-Feruloylglucose 2,3,4-trihydroxy-3-methylbutylglycoside	0	Phenolic acids	Phenolic acids	C21H30O12	492.21	177.05	474.174	[M+NH4]+	3	-	-	106903	128056	98993.7	133192	155376	116695	79822.9	139395	125614	179674	123569	173801	149174	93124.9	173531	158159	114844	87064.2	-	-	-
Lskp211423	Intergristerone A-22-O-galactoside (Sileneoside C)	0	Steroids	Steroidal saponins	C33H54O13	659.36	335.26	658.356	[M+H]+	2	83207-65-2	-	48948.7	94301.3	43929.5	55888.4	32972.1	32105.3	46558.7	82440.8	74257.6	5980.1	5980.1	5980.1	48031.6	31902.4	29900.5	41719.2	75387.8	91271.8	-	-	-
Yamp009440	Meliavosin	0	Terpenoids	Ditepenoids	C21H34O3	335.26	135.12	334.251	[M+H]+	3	-	-	86258.7	93881.5	43799.9	8759.97	8759.97	8759.97	73050.8	90891.3	105167	8759.97	8759.97	8759.97	47752.7	57992.8	87573	73323.3	76811.9	59243.5	-	-	-
Lskp211409	20,26-Dihydroxyecdysone*	0	Steroids	Steroid	C27H44O8	497.31	335.26	496.304	[M+H]+	1	19458-46-9	C16500	180527	150671	110490	18572.2	18572.2	18572.2	143121	171450	200271	18572.2	18572.2	18572.2	183708	142333	92861.1	112258	118451	116413	-	C16500	-
MWStz610	Diosmetin-7-O-glucoside*	0	Flavonoids	Flavones	C22H22O11	463.12	301.07	462.116	[M+H]+	2	20126-59-4	-	276261	93968.8	172893	18793.8	18793.8	18793.8	193170	195234	263106	18793.8	18793.8	18793.8	153713	247888	134099	201494	229058	256263	-	-	-
Sasp009863	Diolone	0	Terpenoids	Ditepenoids	C21H34O3	335.26	95.08	334.251	[M+H]+	3	-	-	120986	171553	14732.3	14732.3	14732.3	14732.3	90533.2	119507	167559	14732.3	14732.3	14732.3	14732.3	14732.3	14732.3	73661.4	86024	148648	-	-	-
Zmyn002321	4-Cresol	0	Others	Others	C7H8O	107.05	106.04	108.058	[M-H]-	1	106-44-5	C01468	96542	98175.8	89151.1	63748.6	66991.4	47621.1	78426.7	113417	73101.2	48740.9	30976.4	34944.2	57398	56331.4	58744.4	68603.9	68965.5	67720.5	ko01100	C01468	MetMap163,MetMap164
Zbfn008434	1-O-Linoleoyl-3-O-galactopyranosyl-L-glycerol	0	Lipids	Glycerol ester	C27H48O9	515.32	279.23	516.33	[M-H]-	1	-	-	1.89359e+06	2.00994e+06	1.65379e+06	1.36134e+06	1.43468e+06	1.40278e+06	1.76816e+06	2.12793e+06	2.00883e+06	674831	744681	703944	1.34736e+06	1.2703e+06	1.2558e+06	1.70968e+06	1.674e+06	1.78537e+06	-	-	-
Walbn04343	Methylprotocatechuate 4-(6''-acetylglucoside)*	0	Phenolic acids	Phenolic acids	C16H20O10	371.1	167.03	372.106	[M-H]-	2	-	-	49127.8	69225.5	36711.2	69565.9	83729.2	104638	70407.7	46179.5	62035.4	72010.4	79580.7	68120.4	67529.1	82906.7	77408.2	66364.1	64028	58446	-	-	-
Zbqn005180	5-(4-(((S)-1-carboxyethyl)carbamoyl)cyclohexyl)-2-hydroxypentanoicacid	0	Alkaloids	Pyridine alkaloids	C15H25NO6	314.16	88.04	315.168	[M-H]-	1	-	-	307298	355269	280812	392300	334227	387532	322999	277950	307973	407567	382880	500468	387257	334118	380918	354299	384544	379760	-	-	-
mws1488	Hexadecanoic acid	0	Lipids	Free fatty acids	C16H32O2	255.23	237.22	256.24	[M-H]-	2	57-10-3	C00249	25772.9	26627.2	18042	15459.5	19218.4	16980.6	23354.7	27947.5	24429.4	21401	16426.6	17973	17944.1	20040.7	18366.2	15150.1	16904.9	16602.7	ko00061,ko00062,ko00071,ko00073,ko01040,ko01100,ko01212	C00249	-
MWSHC20163	Cetostearic acid	0	Lipids	Free fatty acids	C16H32O2	255.24	255.24	256.24	[M-H]-	1	-	-	4.33711e+06	4.65263e+06	4.30927e+06	3.98631e+06	3.83877e+06	3.59348e+06	4.55925e+06	4.94783e+06	4.84414e+06	4.15707e+06	3.81546e+06	4.01295e+06	4.10556e+06	4.30699e+06	3.77138e+06	3.78572e+06	3.54298e+06	3.75226e+06	-	-	-
Lmtn002324	Zizybeoside I	0	Others	Others	C19H28O11	431.15	269.1	432.163	[M-H]-	2	76819-28-8	C17564	39017.2	44622.3	49792.7	61404.3	71275.1	75981.5	39297.9	40431	53043.3	73394.5	64663.8	58746.3	45798.4	47918.6	49859	34442.2	56838.4	42284.4	-	C17564	MetMap164
Zmdn011161	Chrysophanic acid 9-anthrone	0	Quinones	Anthraquinone	C15H12O3	239.07	223.03	240.079	[M-H]-	2	491-58-7	C10314	797755	963328	979944	737391	545704	552126	888457	933618	992951	1.18724e+06	668225	289718	738537	569638	712224	575958	702299	581448	-	C10314	-
Hmsn002272	Demethyl coniferin	0	Others	Alcohol compounds	C15H20O8	327.11	165.05	328.116	[M-H]-	2	-	-	45424.5	90985.4	127921	220449	164960	200630	133185	97974.1	108703	253548	159793	233396	121084	79298.3	98418.7	126356	126341	131731	-	-	-
MWStz402	Urolignoside*	0	Lignans and Coumarins	Lignans	C26H34O11	521.2	359.15	522.21	[M-H]-	2	131723-83-6	-	40168.9	24815.7	32867	58907.6	41361	34301.9	29756.2	22636.2	43972.7	36432.1	55923.7	50477.1	25383.9	39676.7	30422.5	28925	30136.6	30172.7	-	-	-
Wafn001957	2-O-Caffeoylglucarate	0	Phenolic acids	Phenolic acids	C15H16O11	371.06	209.03	372.069	[M-H]-	3	-	C03062	64494.2	39888.9	29590.6	61444.1	53714	64389.2	26296.2	35824.3	45872.8	65812.4	62528.9	60228.6	19126.5	56266.5	56828.8	73333.9	55947.7	59635.8	-	C03062	MetMap168
Zmjn004133	9(S)-HPODE	0	Lipids	Free fatty acids	C18H32O4	311.22	293.21	312.23	[M-H]-	3	5502-91-0	C14827	127023	120163	95706.5	68673.6	69962.9	60180.5	65539.2	124946	103298	21490.8	23424	22625.4	77994	116562	95770.1	67569.7	70192.1	74301.7	ko00591,ko01100	C14827	-
Lacn005442	Rhamnosyl Phellamurin	0	Flavonoids	Flavanonols	C32H40O15	663.23	501.17	664.237	[M-H]-	3	-	-	32527.8	34219.7	38435.7	1647.67	1647.67	1647.67	36472.6	53183	36347.1	15160.6	10138.7	8238.34	18188.3	24836.8	31006.2	22521.1	18733	28245.3	-	-	-
HJN087	Naringenin-4'-O-glucoside	0	Flavonoids	Flavanones	C21H22O10	433.12	271.06	434.121	[M-H]-	3	-	-	42098.4	44556.6	49169.3	6343.51	6343.51	6343.51	38238.7	67851.2	56207.7	6343.51	6343.51	6343.51	45499.4	40023.3	44704.1	31717.6	49192.9	47190.4	-	-	-
Wafn003485	Dihydroxyoctanoic acid glucoside	0	Lipids	Free fatty acids	C14H26O9	337.15	179.06	338.158	[M-H]-	2	-	-	10991	8621.12	10407.1	968.66	968.66	968.66	5949.42	17848.2	4843.3	968.66	968.66	968.66	9517.39	8174.31	6700.53	13732.4	15553	21185.9	-	-	-

## Sheet: Turquoise
nodeName	Compounds	degree	ClassⅠ	ClassⅡ	Formula	Q1 (Da)	Q3 (Da)	Molecular weight (Da)	Ionization model	Level	CAS	cpd_ID	120DAI_1	120DAI_2	120DAI_3	180DAI_1	180DAI_2	180DAI_3	240DAI_1	240DAI_2	240DAI_3	300DAI_1	300DAI_2	300DAI_3	360DAI_1	360DAI_2	360DAI_3	QC01	QC02	QC03	kegg_map	mw_cpd_ID	mw_map
Hmln005329	Ephemeranthoquinone B	29	Quinones	PhenAnthraquinones	C15H12O4	255.07	239.04	256.074	[M-H]-	1	-	-	2.82511e+06	3.23219e+06	3.24287e+06	2.17939e+06	2.46599e+06	2.79724e+06	1.90303e+06	2.06027e+06	1.95906e+06	1.03581e+06	1.31268e+06	1.09126e+06	226624	233281	225286	2.00374e+06	1.79666e+06	1.92265e+06	-	-	-
Zbln007289	fimbriol B	28	Quinones	PhenAnthraquinones	C15H12O4	255.07	212.05	256.074	[M-H]-	1	152841-84-4	-	2.77393e+06	3.23569e+06	3.3933e+06	2.24044e+06	2.4415e+06	2.72716e+06	1.8753e+06	2.10412e+06	2.00532e+06	1.03027e+06	1.27188e+06	1.00029e+06	229206	200157	214084	2.00253e+06	1.80311e+06	1.90188e+06	-	CM02186	MetMap162
Zbln007588	ephemeranthoquinone	26	Quinones	PhenAnthraquinones	C15H12O4	255.07	211.04	256.074	[M-H]-	1	-	-	1.7654e+06	2.02208e+06	2.11582e+06	1.36764e+06	1.52605e+06	1.71452e+06	1.15984e+06	1.36657e+06	1.27747e+06	644391	808119	656963	147888	133613	132042	1.17286e+06	1.16154e+06	1.25436e+06	-	-	-
Rfn05148	5-Megastigmen-7-yne-3,9-diol 3-glucoside	13	Others	Others	C19H30O7	371.2	209.15	370.199	[M+H]+	1	-	-	425939	403204	534948	258795	314768	255103	1.21634e+06	1.37922e+06	1.29e+06	3.28344e+06	3.12887e+06	3.4502e+06	3.45455e+06	4.52693e+06	4.52521e+06	2.05355e+06	1.62467e+06	2.46933e+06	-	-	-
MWS00327g	L-Isoserine	8	Amino acids and derivatives	Amino acids and derivatives	C3H7NO3	106.05	60.04	105.043	[M+H]+	3	632-13-3	-	3.25161e+06	3.3408e+06	3.43296e+06	2.99678e+06	3.06545e+06	2.8161e+06	2.82596e+06	3.01982e+06	2.91905e+06	2.28532e+06	2.34274e+06	2.31904e+06	2.04006e+06	1.97371e+06	2.02278e+06	2.86792e+06	2.83731e+06	2.89764e+06	-	-	-
Laln002027	3,4-dihydroxybenzaldehyde-xylose-glucoside	7	Others	Aldehyde compounds	C18H24O12	431.12	137.02	432.127	[M-H]-	2	-	-	581218	570525	499690	573368	634109	616247	670268	734900	696668	879085	905257	963549	936141	1.04017e+06	950422	775731	746665	798848	-	CM02854	MetMap164
PDP233721	4,5-dihydroxy-2-methyl-3-{[(2s,3r,4s,5s,6r)-3,4,5-trihydroxy-6-(hydroxymethyl)oxan-2-yl]oxy}benzoic acid	6	Phenolic acids	Phenolic acids	C14H18O10	347.1	185.04	346.09	[M+H]+	3	-	-	1.03688e+06	964710	739448	942112	1.23789e+06	860324	959455	1.06595e+06	998498	1.49275e+06	1.65785e+06	1.4661e+06	1.53355e+06	1.64381e+06	1.566e+06	1.17091e+06	1.12907e+06	1.12299e+06	-	-	-
Hmhn003518	4-O-β-D-glucopyranosylferulic acid	5	Phenolic acids	Phenolic acids	C16H20O9	355.1	175.04	356.111	[M-H]-	1	-	-	1.4121e+07	1.37874e+07	1.56612e+07	1.23656e+07	1.26297e+07	1.34472e+07	1.40633e+07	1.47911e+07	1.52212e+07	7.35266e+06	8.43212e+06	7.44809e+06	5.91596e+06	5.34167e+06	6.13727e+06	1.22328e+07	1.27068e+07	1.22275e+07	-	-	-
Rfn063680	2-β-D-Glucopyranosyloxy-4-methoxy-cis-cinnamic acid	5	Phenolic acids	Phenolic acids	C16H20O9	355.1	175.04	356.111	[M-H]-	1	-	-	1.2912e+07	1.55579e+07	1.7934e+07	1.21703e+07	1.36459e+07	1.25811e+07	1.44343e+07	1.42114e+07	1.29608e+07	7.29422e+06	7.65225e+06	7.5952e+06	5.23216e+06	6.76907e+06	6.00101e+06	1.1305e+07	1.30677e+07	1.25107e+07	-	-	-
Zblp006959	retusiusine D	4	Quinones	PhenAnthraquinones	C15H12O4	257.08	211.08	256.074	[M+H]+	1	-	-	348534	442806	384056	278427	314508	355228	239644	248592	263222	110542	143879	98777.4	32239.8	50559.4	36251.6	235577	235961	218778	-	-	-
Wdjp001467	2-(7-hydroxy-2,4-dimethoxyphenanthren-3-yl)oxy-6-(hydroxymethyl)oxane-3,4,5-triol	4	Others	Others	C22H24O9	433.14	139.05	432.142	[M+H]+	1	-	-	3.00824e+06	2.8914e+06	2.27135e+06	2.78158e+06	3.04425e+06	2.89377e+06	3.04143e+06	2.6967e+06	3.41157e+06	3.85811e+06	3.6643e+06	4.09199e+06	3.719e+06	4.54087e+06	4.24532e+06	3.58176e+06	3.4237e+06	3.31346e+06	-	-	-
Zmdp001663	γ-Glu-Met	4	Amino acids and derivatives	Amino acids and derivatives	C10H18N2O5S	279.1	133.03	278.094	[M+H]+	3	17663-87-5	-	38492.7	82838.9	69073	65109.1	63396.4	74152.3	63937.4	49560.2	58361.4	21500.6	26549.2	37079.7	24110	20369.8	21310.3	29706	36776.7	50344.7	-	-	-
pmp001244	Caffeoylcholine	4	Alkaloids	Phenolamine	C14H20NO4+	266.14	207.07	266.139	[M]+	3	87189-10-4	-	105720	153550	169987	182255	158425	87245.3	108430	111569	137217	14636.2	14636.2	14636.2	14636.2	14636.2	14636.2	84266.7	73181.2	95666.2	-	-	-
Zmhn002422	1-O-Feruloyl-beta-D-glucose*	4	Phenolic acids	Phenolic acids	C16H20O9	355.1	193.05	356.111	[M-H]-	1	7196-71-6	C17759	1.3046e+06	1.31255e+06	1.19587e+06	1.07624e+06	1.01787e+06	1.14683e+06	1.26649e+06	1.13885e+06	1.30647e+06	678787	709595	656641	549137	508744	507720	998999	1.0017e+06	935543	-	C17759	MetMap165,MetMap166,MetMap168,MetMap169
Lmqn003292	4,5,8-Trihydroxy-α-tetralone-5-O-glucoside	4	Quinones	Naphthol	C16H20O9	355.1	193.05	356.111	[M-H]-	1	-	-	1.36872e+06	1.44029e+06	1.30743e+06	1.21733e+06	1.11992e+06	1.21042e+06	1.17922e+06	1.2374e+06	1.30144e+06	687759	722287	581088	533374	561181	592422	986281	922132	935592	-	-	-
Lmrj002793	Cyclo(Phe-Glu)	3	Amino acids and derivatives	Amino acids and derivatives	C14H16N2O4	277.12	120.08	276.111	[M+H]+	3	-	-	29226.4	46576.3	32910.2	38403.4	63555.1	57932.7	91346.5	76021.9	74146.8	167150	204019	165282	233275	175719	230270	99409.7	91593.3	93190.5	-	-	-
Rfn03227	Pyr-phe-OH	3	Amino acids and derivatives	Amino acids and derivatives	C14H16N2O4	277.12	120.08	276.111	[M+H]+	3	21282-12-2	-	36305.4	46100.1	37885.5	47221.9	35394.9	39932.5	58045.5	65398.3	47993	201505	155576	207454	263827	146413	200912	99228.4	73479.4	96307	-	-	-
Wacyp01167	(6-amino-3-oxohexan-2-yl)proline	3	Amino acids and derivatives	Amino acids and derivatives	C11H20N2O3	229.15	142.09	228.147	[M+H]+	1	-	-	6.19701e+06	6.36789e+06	4.66861e+06	6.29445e+06	6.77448e+06	6.43027e+06	7.5364e+06	7.59985e+06	8.14306e+06	9.35179e+06	9.69881e+06	9.21795e+06	1.09671e+07	1.09051e+07	1.03299e+07	8.21933e+06	7.95004e+06	7.80341e+06	-	-	-
Wdbp006366	Stilbostemin K	3	Others	Stilbene	C16H18O4	275.13	151.08	274.12	[M+H]+	3	-	-	94044.4	121985	97983.5	54496.7	62218.4	95271.5	67741.5	70387.6	77363.1	44902	53826.4	40212.6	22566.4	24525.2	18498.9	66814.2	81262.2	54224.4	-	-	-
pmp001125	Dendrobin A	3	Phenolic acids	Phenolic acids	C16H18O4	275.13	151.08	274.12	[M+H]+	3	-	-	91465.6	103389	104490	69483.8	77446.4	82945.5	85947.6	60326.9	70681.2	47037.7	56701.9	45298.3	26658.6	28380.9	24731.9	62460.7	69984.4	64262	-	-	-
WapTKC018601	Cyanthiwigin AA	3	Terpenoids	Ditepenoids	C20H26O3	315.2	161.09	314.188	[M+H]+	1	481643-62-3	-	76366.8	64383.7	82732.6	52460.7	58457.3	81351.4	62204.5	70034.7	78739.3	38217.4	58631.3	38663.6	43571.2	35292.1	33298	52225.5	56178.7	57896.5	-	-	-
Yamp010899	Eichlerialactone	3	Terpenoids	Triterpene	C27H42O4	431.32	177.09	430.308	[M+H]+	3	-	-	64832.4	52098.3	51307.3	67720.1	42967.6	43634.2	26836.4	46163.1	63714.1	18944.5	7160.03	14927.4	1432.01	1432.01	1432.01	57720.5	63468.4	56177.8	-	-	-
PDP133927	3-methyl-2-[(5-oxopyrrolidin-2-yl)formamido]pentanoic acid*	3	Amino acids and derivatives	Amino acids and derivatives	C11H18N2O4	243.13	86.1	242.127	[M+H]+	3	-	-	16523.6	15971.7	25620.8	27039	44367.3	48129.4	34665.3	32677.9	35367	79079.4	46109.2	119664	92517.5	100520	89712.9	75891.8	55206.5	64931.6	-	-	-
Lcfn121113	DL-Glycerol 1-phosphate	3	Organic acids	Organic acids	C3H9O6P	171.01	78.96	172.014	[M-H]-	2	57-03-4	C03189	157811	189675	198011	184441	187985	187707	170481	149133	150807	117412	113857	117733	98554	119309	84069.7	160639	161383	180698	-	C03189	-
Safn000917	D-Mannose 6-phosphate	3	Others	Saccharides	C6H13O9P	259.02	78.96	260.03	[M-H]-	1	-	C00275	4.88935e+06	5.84831e+06	5.36268e+06	4.19432e+06	4.25011e+06	4.3807e+06	5.18525e+06	4.68282e+06	4.61588e+06	3.37048e+06	3.52793e+06	3.46973e+06	2.95585e+06	2.97247e+06	2.40203e+06	4.56441e+06	4.24932e+06	4.25178e+06	ko00051,ko00520,ko01100,ko01110,ko01240,ko01250	C00275	-
Lcsn004327	(Indol-3-yl)acetyl-L-aspartate	3	Alkaloids	Plumerane	C14H14N2O5	289.08	88.04	290.09	[M-H]-	1	2456-73-7	C22224	1.727e+06	1.28699e+06	1.2231e+06	2.06492e+06	1.85881e+06	1.90582e+06	1.81179e+06	1.89198e+06	2.0103e+06	2.76466e+06	2.90873e+06	2.78621e+06	2.54479e+06	3.38771e+06	2.90131e+06	2.05313e+06	2.08004e+06	1.96115e+06	-	C22224	-
MWSmce049	3'-Hydroxypterostilbene	3	Others	Stilbene	C16H16O4	271.1	255.07	272.105	[M-H]-	2	475231-21-1	-	14250.4	19190.9	17056.6	11160.6	10603.9	14275.9	10528	9806.57	9631.64	7141.14	6561.1	4947.96	989.592	989.592	989.592	10906.7	9956.58	9714.86	-	CM02276	MetMap152
Lakn002075	4-Hydroxybenzoic acid glucosyl xyloside*	3	Phenolic acids	Phenolic acids	C18H24O12	431.12	137.02	432.127	[M-H]-	2	-	-	457859	441043	360791	448551	480878	514079	510458	541678	572329	678308	694514	705100	729150	803369	710782	539204	610089	598257	-	CM02441	MetMap157
Wasn005621	Glucosyl 9-hydroxy-3-methyldec-2-enoic acid	3	Terpenoids	Monoterpenoids	C17H30O8	361.19	199.13	362.194	[M-H]-	3	-	-	22739.6	18526.2	27946.1	15528.2	16313.7	18162.7	17041.3	12988.1	17424.5	2597.62	2597.62	2597.62	2597.62	2597.62	2597.62	28504.7	19616.6	13510	-	-	-
Lmxn006423	2(3H)-Benzothiazolone	2	Alkaloids	Alkaloids	C7H5NOS	150	122.01	151.009	[M-H]-	1	934-34-9	-	14500.8	13132.7	13731	12672.6	14991.7	16630.8	15750.1	14129.2	14983.3	28463.7	39983.5	30557.4	31403.4	34319.7	34824.9	19482	20967.5	16008.2	-	-	-
Qmyp101114	9-O-β-D-Glucoside of 3-hydroxy-7,8-didehydro-β-ionol*	1	Terpenoids	Sesquiterpenoids	C19H30O7	371.21	209.15	370.199	[M+H]+	1	-	-	731462	691314	439058	403455	219798	244904	738293	951241	883806	3.04554e+06	3.92345e+06	2.96886e+06	3.85952e+06	3.52671e+06	2.57198e+06	2.10364e+06	3.0106e+06	1.50388e+06	-	-	-
Sasp005342	(6R,9S)-3-Oxo-alpha-ionol glucoside*	1	Terpenoids	Sesquiterpenoids	C19H30O7	371.21	209.16	370.199	[M+H]+	1	-	-	633017	553872	365111	293417	212148	227177	607597	816123	908921	2.42491e+06	3.16428e+06	2.95653e+06	3.51381e+06	2.91963e+06	2.31529e+06	1.74901e+06	2.77335e+06	1.27024e+06	-	-	-
Cmsp005585	Ephemeranthol A	1	Quinones	PhenAnthraquinones	C16H16O4	273.11	195.08	272.105	[M+H]+	3	135545-86-7	-	22648.8	22696.5	18403.9	19165.9	29135.1	23034	27369.1	25000.1	10856.2	2171.23	2171.23	2171.23	2171.23	2171.23	2171.23	26053.3	13844.5	27282.6	-	CM02198	MetMap162
Sahp003984	Sonnerstigmane D	1	Terpenoids	Sesquiterpenoids	C19H30O8	385.19	85.03	386.194	[M-H]-	3	1638956-06-5	-	83263.2	67487.7	72771.1	96078.7	87332.9	69484.2	96623.3	107698	95413.5	128891	113826	100478	112241	119675	130753	111193	100208	96785.3	-	-	-
Rfn031356	Apiosylglucosyl 4-hydroxybenzoate*	1	Phenolic acids	Phenolic acids	C18H24O12	431.12	137.02	432.127	[M-H]-	2	-	-	529580	517855	450411	465950	483492	569537	612955	600071	596786	715669	796368	903570	752073	939735	739799	681535	713919	806060	-	-	-
Waptp03206	7-Hydroxy-8-Methoxychromanon*	0	Lignans and Coumarins	Coumarins	C10H10O4	195.06	117.03	194.057	[M+H]+	1	-	-	3.81643e+06	4.33367e+06	3.39093e+06	1.77244e+06	2.21559e+06	2.9012e+06	3.07764e+06	4.82646e+06	2.58233e+06	1.40718e+06	1.07534e+06	1.26299e+06	1.12673e+06	822455	695066	2.05604e+06	1.98661e+06	2.10534e+06	-	-	-
Walbp03047	6-Hydroxy-7-methoxydihydrocoumarin*	0	Lignans and Coumarins	Coumarins	C10H10O4	195.06	117.03	194.057	[M+H]+	1	-	-	6.28987e+06	6.76812e+06	7.25005e+06	4.25865e+06	4.36572e+06	5.68723e+06	7.0276e+06	5.7911e+06	7.03064e+06	3.48752e+06	2.35233e+06	3.19462e+06	3.03118e+06	1.90118e+06	2.03372e+06	5.95543e+06	5.09292e+06	5.81511e+06	-	-	-
MWSmce463	Mesitaldehyde	0	Others	Aldehyde compounds	C10H12O	149.1	65.04	148.089	[M+H]+	3	487-68-3	-	648422	516043	781384	496641	472409	662809	461304	537152	337312	274875	401213	451744	354696	374285	415155	136387	329945	224534	-	-	-
mws1383	Lumichrome	0	Alkaloids	Alkaloids	C12H10N4O2	243.09	145.08	242.08	[M+H]+	3	1086-80-2	C01727	606694	777670	613120	468845	559315	485102	393992	472762	514291	437764	337744	277758	272273	267082	279480	355530	417411	399043	ko00740	C01727	-
Hmqp005455	15(R)-Hydroxylinoleic Acid*	0	Lipids	Free fatty acids	C18H32O3	297.24	81.07	296.235	[M+H]+	1	177931-23-6	-	563347	589680	480688	420885	388514	383950	417229	411096	393273	219492	246156	282518	237450	222062	229754	371421	342887	373748	-	-	-
Salp004689	Platanionoside F	0	Terpenoids	Sesquiterpenoids	C24H38O11	503.25	133.1	502.241	[M+H]+	2	450414-28-5	-	46523.7	58643.8	67421.7	90689	70475.5	55347.7	45267.9	61818.3	57862.5	127610	93126.4	105809	103524	123619	83017	87496.3	65158.2	62953.3	-	-	-
PD0330133	Tyrosylvaline	0	Amino acids and derivatives	Amino acids and derivatives	C14H20N2O4	281.15	136.08	280.142	[M+H]+	3	17355-09-8	-	63491.4	89728.4	53865	93713.3	58073.1	87526.9	74347.6	74026	48440.3	92412.7	108456	99107.3	127641	119014	76657.2	74192.2	129704	75867.5	-	-	-
MWStz389	Cyclo(Ser-Pro)	0	Amino acids and derivatives	Amino acids and derivatives	C8H12N2O3	185.09	70.07	184.085	[M+H]+	2	1355217-25-2	-	219051	186899	188422	215934	274435	211247	236106	206031	216615	361676	406776	376342	353693	350252	352238	232440	236273	268489	-	-	-
Sasp005477	1,4,4,7a-tetramethyl-2,4,5,7a-tetrahydro-1H-inden-2-one	0	Terpenoids	Sesquiterpenoids	C13H18O	191.14	133.1	190.136	[M+H]+	1	-	-	2.50484e+06	2.71749e+06	2.43776e+06	2.29661e+06	2.01386e+06	1.87938e+06	2.28648e+06	2.09358e+06	2.51774e+06	2.40943e+06	1.77585e+06	1.66192e+06	1.59267e+06	1.69619e+06	1.85593e+06	1.69739e+06	1.44072e+06	1.65452e+06	-	-	-
Wacyp04980	3,7,11-trimethyldodeca-3,7-diene-1,10,11-triol 10-O-(beta-D-Xylopyranosyl)-beta-D-glucopyranoside	0	Terpenoids	Sesquiterpenoids	C26H46O12	568.33	221.19	550.299	[M+NH4]+	2	-	-	80025.9	111120	72299.8	209732	171570	114666	265070	148496	285280	377746	338161	204088	271137	513397	218136	188117	266919	177580	-	-	-
MWStz255	Cyclo(Pro-Phe)	0	Amino acids and derivatives	Amino acids and derivatives	C14H16N2O2	245.13	120.08	244.121	[M+H]+	3	3705-26-8	C11847	49532.4	48638.6	51490.3	47396.6	56942.4	69798.5	25538.1	39639	35958.1	112208	89987.8	126550	103453	76287.7	124256	76370	67869.9	76422.6	-	C11847	-
MWSslk154	Triethyl citrate	0	Organic acids	Organic acids	C12H20O7	277.13	115.04	276.121	[M+H]+	3	77-93-0	-	117900	120528	117615	118316	117841	123789	122752	102910	102647	105952	96354.8	97853.9	98333.2	105396	95803.1	108932	107858	117920	-	-	-
HJAP104	Benzaldehyde	0	Others	Aldehyde compounds	C7H6O	107.05	77.04	106.042	[M+H]+	1	100-52-7	C00261	262019	266440	186237	106038	107037	115545	200418	158850	163881	112630	96015.9	82952.5	72770.9	98616.4	100969	117273	194958	110611	ko01100	C00261	MetMap164,MetMap172
pme2890	L-Homocystine	0	Amino acids and derivatives	Amino acids and derivatives	C8H16N2O4S2	269.06	136.04	268.055	[M+H]+	3	626-72-2	C01817	47712.2	39725	40744	72792.2	54483.1	52225.5	40167.6	55605.2	37607.8	64844.6	57048.9	49157.9	59053	61239.7	64888.4	51908.4	60686.5	66730.6	ko00270	C01817	-
MWSmce314	Indolin-2-one	0	Alkaloids	Plumerane	C8H7NO	134.06	106.07	133.053	[M+H]+	3	59-48-3	C12312	53472.4	32603.9	32335.9	36839.2	20403	19499.6	47358.3	26718	33183.2	76157.4	66224.9	73355.8	46901.2	85721	72966.4	64678.6	76365.7	67083.3	ko00999,ko01100,ko01110	C12312	-
MWSmce448	Imidazol-1-yl-acetic acid*	0	Alkaloids	Alkaloids	C5H6N2O2	127.05	81.04	126.043	[M+H]+	3	22884-10-2	-	2.10301e+06	2.23274e+06	2.30512e+06	1.85649e+06	1.67834e+06	1.78752e+06	1.70346e+06	1.58097e+06	1.66136e+06	1.47559e+06	1.51685e+06	1.50959e+06	1.58752e+06	1.3861e+06	1.04958e+06	1.58274e+06	2.02344e+06	1.83504e+06	-	-	-
pme3017	2-Amino-2-methylpropanoate	0	Organic acids	Organic acids	C4H9NO2	104.07	58.07	103.063	[M+H]+	3	62-57-7	C03665	9.73207e+06	9.672e+06	7.97835e+06	7.22709e+06	6.89969e+06	7.26995e+06	7.35336e+06	7.33851e+06	7.18002e+06	4.04097e+06	5.82582e+06	5.25659e+06	5.12709e+06	5.21691e+06	4.86248e+06	7.36789e+06	8.28965e+06	7.26406e+06	-	C03665	-
MWS00204g	N-Ethylglycine*	0	Amino acids and derivatives	Amino acids and derivatives	C4H9NO2	104.07	58.07	103.063	[M+H]+	3	627-01-0	C11735	9.27348e+06	8.80332e+06	7.65971e+06	6.78369e+06	6.56117e+06	6.98822e+06	7.02066e+06	7.15583e+06	6.56634e+06	3.75788e+06	5.49077e+06	5.27376e+06	5.11115e+06	4.9995e+06	4.50978e+06	7.1872e+06	8.15515e+06	7.0525e+06	-	C11735	-
Hmqp005411	9-Oxo-12Z-Octadecenoic acid*	0	Lipids	Free fatty acids	C18H32O3	297.24	81.07	296.235	[M+H]+	1	112543-32-5	-	469347	524385	419069	330188	357897	318131	357832	316340	345414	199779	214217	255540	217530	190672	203322	370726	276912	303910	-	-	-
Latp009318	Virgaurenolide A	0	Terpenoids	Sesquiterpenoids	C20H22O5	343.15	163.07	342.146	[M+H]+	3	-	-	4.04391e+06	4.09158e+06	3.84684e+06	3.30345e+06	3.46883e+06	3.83238e+06	3.15307e+06	3.65274e+06	3.56386e+06	3.03727e+06	3.06774e+06	3.07499e+06	3.16863e+06	3.02712e+06	3.00085e+06	3.16147e+06	3.61051e+06	3.29269e+06	-	-	-
PDN018956	8-hydroxyoctadeca-9,11-dienoic acid	0	Lipids	Free fatty acids	C18H32O3	297.24	69.07	296.235	[M+H]+	3	-	-	233974	237416	209099	160830	182071	148936	193200	200097	224314	91007.1	96593.7	106488	81006.2	89927.6	99472.2	171320	172433	185385	-	-	-
pmb0292	Cholesterol	0	Steroids	Steroid	C27H46O	387.36	331.13	386.355	[M+H]+	3	57-88-5	C00187	584284	739799	704675	688408	719652	632480	823933	570994	567506	812152	883488	817904	951864	825470	820364	1.0483e+06	1.08776e+06	1.12269e+06	ko00100,ko01100,ko04148	C00187	-
Cmyp001700	Hydrohydrastinine	0	Alkaloids	Isoquinoline alkaloids	C11H13NO2	192.1	177.08	191.095	[M+H]+	2	494-55-3	-	335669	340973	248366	411343	417701	541826	458759	459703	459347	828528	889858	820519	770923	784283	789400	642724	550883	495093	-	-	-
Rlp00276	1-[(2R)-Pyrrolidin-2-yl]propan-2-one	0	Alkaloids	Alkaloids	C7H13NO	128.11	70.07	127.1	[M+H]+	3	130325-43-8	-	1.42113e+06	1.07814e+06	1.1178e+06	792412	751495	791535	945646	1.12116e+06	976929	488922	546303	489741	305764	264105	310074	681721	841249	735090	-	-	-
pmd0130	LysoPC 14:0	0	Lipids	LPC	C22H46NO7P	468.31	184.07	467.301	[M+H]+	2	20559-16-4	-	77537	75604.5	54372.1	40447.7	49187.4	56492.8	59153.2	59632.5	45825.7	36403.5	36316.2	45375	32239.2	33894.7	30772.2	48099.9	47618.2	55860.6	-	-	-
Rlp011429	5-(6-hydroxy-6-methylheptan-2-yl)-4a-methyl-decahydronaphthalen-1-ol	0	Terpenoids	Sesquiterpenoids	C19H36O2	297.28	69.07	296.272	[M+H]+	3	-	-	240606	268186	222373	132687	172022	152069	212057	217866	228100	109719	109021	84732.5	98127.1	119266	121846	180144	180498	188501	-	-	-
MWSHC20109	Coumarin	0	Lignans and Coumarins	Coumarins	C9H6O2	147.04	91.06	146.037	[M+H]+	1	91-64-5	C05851	1.55561e+06	1.45319e+06	1.1185e+06	1.0115e+06	976209	749439	1.17714e+06	1.24856e+06	1.12529e+06	422442	543877	517513	369692	373898	422611	598913	896116	630970	ko00999,ko01110	C05851	-
Wdjp005489	2-(4-hydroxy-3-methoxyphenyl)-3-(hydroxymethyl)-9-methoxy-2,3,4,5-tetrahydronaphtho[2,1-e][1]benzofuran-7-ol	0	Others	Others	C25H24O6	421.15	259.1	420.157	[M+H]+	3	-	-	2.62811e+06	3.99261e+06	2.49126e+06	529782	373257	448303	1.7017e+06	1.47981e+06	2.11717e+06	264800	435784	397614	62245.2	103796	88416.8	1.04967e+06	1.37329e+06	891882	-	-	-
Wbwp010459	5-[(2r,3s,4s,5s)-5-(2h-1,3-benzodioxol-5-yl)-3,4-dimethyloxolan-2-yl]-2-methoxyphenol*	0	Lignans and Coumarins	Lignans	C20H22O5	343.15	163.07	342.147	[M+H]+	1	-	-	4.12013e+06	4.00485e+06	4.30608e+06	3.58654e+06	3.67622e+06	4.34287e+06	3.77595e+06	3.84394e+06	3.76525e+06	3.15412e+06	3.3183e+06	3.5403e+06	3.4499e+06	3.2815e+06	3.51551e+06	3.45745e+06	3.83673e+06	3.46207e+06	-	-	-
MWS201434	Ile-His	0	Amino acids and derivatives	Amino acids and derivatives	C12H20N4O3	269.16	156.08	268.154	[M+H]+	3	97284-12-3	-	26974.5	29158	24227.8	22237.1	19270.2	36706.6	37969.6	12068.2	29870.9	31758.6	39062.1	43459.5	47085.9	43384.5	34822.5	37981.5	20949.5	31884.3	-	-	-
mws5035	L-Leucyl-L-phenylalanine	0	Amino acids and derivatives	Amino acids and derivatives	C15H22N2O3	279.17	120.08	278.163	[M+H]+	2	56217-82-4	-	267265	227185	236245	273247	358377	269369	184048	187625	284890	297031	518725	351053	428529	394393	366925	285762	361219	202195	-	-	-
pmc0281	Ribosyladenosine	0	Nucleotides and derivatives	Nucleotides and derivatives	C15H21N5O8	400.15	136.06	399.139	[M+H]+	3	-	-	678917	671300	577366	734676	826701	734362	831938	818576	821914	818732	910721	803430	879719	1.03038e+06	960125	819636	747667	763894	-	-	-
MWSslk257	CMP	0	Nucleotides and derivatives	Nucleotides and derivatives	C9H14N3O8P	324.06	112.05	323.052	[M+H]+	3	63-37-6	C00055	88165.2	62037.1	79992.6	66924.7	62513.1	58553.9	94563.6	65539.7	65776.6	30118.8	46947.2	96049.1	54214.8	51975.5	55534.5	73210.9	63454.1	66489.4	ko00240,ko01100,ko01232	C00055	-
pmb1912	10-Formyltetrahydrofolate*	0	Alkaloids	Alkaloids	C20H23N7O7	474.17	327.12	473.166	[M+H]+	1	2800-34-2	C00234	2.79864e+06	1.64048e+06	1.44135e+06	2.21003e+06	2.09525e+06	3.26951e+06	2.35392e+06	1.81772e+06	2.13363e+06	2.90697e+06	3.56673e+06	3.10433e+06	2.47789e+06	2.41363e+06	3.44147e+06	3.11356e+06	2.83375e+06	2.55229e+06	ko00670,ko00970,ko01100,ko01200,ko01240	C00234	-
Lcfp224172	Dipropyleneglycoldibenzoate*	0	Others	Others	C20H22O5	343.15	163.08	342.147	[M+H]+	1	20109-39-1	-	4.41802e+06	5.00773e+06	4.55119e+06	3.88987e+06	4.34149e+06	3.95714e+06	4.47493e+06	4.88711e+06	3.6265e+06	3.67925e+06	3.69704e+06	3.70527e+06	3.83394e+06	3.59841e+06	3.5061e+06	3.40114e+06	3.95779e+06	3.4277e+06	-	-	-
Lmsp000796	Pelletierine	0	Alkaloids	Piperidine alkaloids	C8H15NO	142.12	84.09	141.115	[M+H]+	3	4396-01-4	C06182	721832	587534	557277	312275	287448	315546	448560	381877	457169	159570	128319	163402	57313.6	44405	62656.8	264511	330683	285345	ko00960,ko01100,ko01110	C06182	-
MWSslk209	Rhaponticin	0	Others	Stilbene	C21H24O9	421.15	259.1	420.142	[M+H]+	1	155-58-8	C10288	1.77142e+06	2.53385e+06	1.25331e+06	325129	502269	463195	1.24311e+06	1.37471e+06	1.58095e+06	241222	350845	317984	73303.2	94199.8	79952.7	734948	1.15916e+06	885308	-	C10288	MetMap152
Rfn001798	H-Pro-Ile-OH	0	Amino acids and derivatives	Amino acids and derivatives	C11H20N2O3	229.15	70.07	228.147	[M+H]+	2	51926-51-3	-	2.33694e+06	2.56402e+06	1.41868e+06	2.11448e+06	2.21756e+06	2.26852e+06	2.52159e+06	2.93657e+06	2.91145e+06	3.22227e+06	3.33898e+06	3.96666e+06	4.17639e+06	3.55959e+06	3.23202e+06	2.43683e+06	2.76645e+06	2.36009e+06	-	-	-
PD0393826	7-[4,5-dihydroxy-6-(hydroxymethyl)-3-(3,4,5-trihydroxy-6-methyloxan-2-yl)oxyoxan-2-yl]oxychromen-2-one	0	Lignans and Coumarins	Coumarins	C21H26O12	471.15	163.04	470.142	[M+H]+	3	-	-	232900	183979	73419	324689	308425	264340	417208	356090	415685	434759	565379	505082	481777	667135	523968	362674	294949	398398	-	-	-
Hmhp005846	Tenaxin I*	0	Flavonoids	Flavones	C18H16O7	345.09	330.07	344.09	[M+H]+	1	86926-52-5	-	8.77863e+06	8.12692e+06	7.23498e+06	1.30775e+07	1.62901e+07	1.1568e+07	1.24808e+07	1.29502e+07	1.31076e+07	1.65995e+07	1.59659e+07	1.53166e+07	1.71974e+07	1.62294e+07	1.5639e+07	1.71378e+07	1.33659e+07	1.77002e+07	-	-	-
Wdgp008412	conodurinine	0	Alkaloids	Plumerane	C42H50N4O6	707.39	365.13	706.373	[M+H]+	2	603066-10-0	-	122213	178970	128488	120897	124265	132309	157821	114281	138551	107101	115907	91658.4	129117	117132	92385.6	128224	111567	158748	-	-	-
PDP051559	2-(2,6-dihydroxy-4-methylphenyl)-6-(hydroxymethyl)oxane-3,4,5-triol	0	Others	Others	C13H18O7	287.11	125.06	286.105	[M+H]+	2	-	-	860419	699369	741655	392223	436650	449400	379958	353619	487849	198641	206503	190585	51145.2	29596.8	25993.1	441588	364042	433255	-	-	-
pmp001014	1-Glycosyloxy-2-hydroxy-4-methoxyxanthone	0	Flavonoids	Other Flavonoids	C20H20O10	421.11	259.1	420.106	[M+H]+	3	-	-	3.13377e+06	4.41925e+06	2.57785e+06	599165	1.01109e+06	872430	2.54905e+06	2.41049e+06	2.89787e+06	415917	633354	514729	147863	81161.9	81917.6	1.72768e+06	1.72388e+06	1.94147e+06	-	-	-
Zbyp002402	Methylarbutin*	0	Phenolic acids	Phenolic acids	C13H18O7	287.11	107.05	286.104	[M+H]+	1	6032-32-2	C17599	592915	619318	608195	316004	384758	337902	337917	381311	309055	128480	184752	160269	26847.6	28848.9	32159.1	327821	296485	336672	-	C17599	-
Zmhp004065	7,8-Dihydroxy-5,6,4'-trimethoxyflavone*	0	Flavonoids	Flavones	C18H16O7	345.1	330.07	344.09	[M+H]+	1	-	-	8.48383e+06	7.48996e+06	5.52708e+06	7.69743e+06	1.22937e+07	1.35106e+07	1.37537e+07	1.09792e+07	1.1765e+07	1.44186e+07	1.35421e+07	1.72288e+07	1.56036e+07	2.01256e+07	1.58819e+07	1.36153e+07	1.53194e+07	1.83975e+07	-	-	-
MWStz362	3,7,4'-Tri-O-methylquercetin	0	Flavonoids	Flavonols	C18H16O7	345.1	330.08	344.09	[M+H]+	1	572-32-7	C04444	1.16646e+07	8.6484e+06	7.07406e+06	1.46551e+07	1.63784e+07	1.40495e+07	1.33812e+07	1.74873e+07	1.64591e+07	1.7093e+07	2.25204e+07	1.66118e+07	1.75756e+07	1.94089e+07	1.74032e+07	1.49704e+07	1.34294e+07	1.97667e+07	ko00944,ko01110	C04444	-
Salp002154	Phe-Tyr	0	Amino acids and derivatives	Amino acids and derivatives	C18H20N2O4	329.15	120.08	328.142	[M+H]+	2	-	-	51614	52373.5	25482.7	77664.2	98681.7	69372.6	37778.6	45624.5	39214.4	85669.8	139484	77643.5	77883	160930	114336	87825.6	57228.4	58661.6	-	-	-
WaXYp02237	glutamyl-tyramine	0	Amino acids and derivatives	Amino acids and derivatives	C13H18O4N2	267.13	121.07	266.125	[M+H]+	2	-	-	500411	701975	561004	378719	455867	322074	300960	439356	358957	390391	308898	319479	71870.6	132855	78530	397998	391651	327884	-	-	-
WapTKC205981	Periconianone K	0	Others	Others	C12H16O3	209.12	131.09	208.11	[M+H]+	1	-	-	321827	322824	366854	195777	147423	146690	183645	163667	198663	63458	119177	161762	121622	52853.5	59132.1	147015	190243	195930	-	-	-
Lcfp056369	Isopentenyladenine9-Glucoside	0	Nucleotides and derivatives	Nucleotides and derivatives	C16H23N5O5	366.18	204.12	365.17	[M+H]+	3	83087-94-9	-	269120	269664	161324	365123	232526	314934	245493	396473	369054	514863	510717	621937	512383	503994	505799	471709	433722	465366	-	-	-
Lmap001606	Helicidol*	0	Phenolic acids	Phenolic acids	C13H18O7	287.11	107.05	286.105	[M+H]+	1	106982-96-1	-	703222	619796	528574	379891	380603	356211	315126	328687	298820	136539	133488	125769	25153.8	25153.8	25153.8	353615	339369	375846	-	CM02856	MetMap164
ZbWp003008	N-Ethylphenylalanine	0	Amino acids and derivatives	Amino acids and derivatives	C11H15NO2	194.12	120.08	193.11	[M+H]+	3	-	-	35629.2	33319.6	3994.56	37829.9	36931.3	38156.5	27420.3	19972.8	35309.8	62395.1	64633.8	62121.6	50602	57322.3	49196.5	22198.3	58715.5	41420.7	-	-	-
MWSHC20182	Cyclo(L-tyrosyl-D-proline)	0	Amino acids and derivatives	Amino acids and derivatives	C14H16N2O3	261.12	136.08	260.116	[M+H]+	3	61117-56-4	-	4168.28	4168.28	4168.28	26078.4	29891.2	21048	20841.4	29877.9	21866.8	88516.9	66416.4	109682	100896	74639.2	71180.9	44012.3	35018.4	70720.6	-	-	-
MWSHY0118	4',5,6,7-Tetramethoxyflavone	0	Flavonoids	Flavones	C19H18O6	343.12	282.09	342.11	[M+H]+	3	1168-42-9	C14472	30497	19306.3	23900	17865.4	17820.6	9913.38	12422.2	10559.5	16395.3	104916	76771.3	94313.6	90079.4	86281.3	61483.2	42241	39800.8	40170.8	-	C14472	-
Rfp02744	Hamamelitannin	0	Phenolic acids	Phenolic acids	C20H20O14	502.12	153.02	484.085	[M+NH4]+	3	469-32-9	-	42492	34467.2	34024.4	26412.3	32773.2	14468.2	30251.2	26456.5	19419.4	17433.9	13998.8	17837.4	10713.1	16469.2	4293.69	13891.1	26236.4	26285.8	-	-	-
PDP191855	(3,4,5,6-tetrahydroxyoxan-2-yl)methyl 4-hydroxy-2-(hydroxymethyl)benzoate	0	Organic acids	Organic acids	C14H18O9	331.1	151.04	330.095	[M+H]+	2	-	-	87383.8	85309.7	65974.6	65720.1	73113.8	55433.1	92580.4	55007.9	58642.2	24670.6	57948.7	44400.2	29318.6	33628.3	43702.4	49781.5	59559	44078.4	-	-	-
PDP196312	2-{6-oxo-1-[3,4,5-trihydroxy-6-(hydroxymethyl)oxan-2-yl]-1,6-dihydropyridin-2-yl}acetic acid	0	Alkaloids	Alkaloids	C13H17NO8	316.1	154.05	315.095	[M+H]+	2	-	-	779886	733408	94711.1	763670	792683	841011	602092	596835	713328	843877	729112	832167	700820	991645	771929	473555	775052	950776	-	-	-
Sasp006960	N-[(2S)-2-hydroxy-2-phenylethyl]benzenecarboximidic acid	0	Others	Others	C15H15NO2	242.12	121.06	241.11	[M+H]+	3	-	-	22944.6	19983.4	33755.2	10840.5	15202.6	20500.8	11819.7	12499.8	5124.25	5928.72	11066.1	7462.46	1024.85	1024.85	1024.85	21037.1	12706.4	12949.5	-	-	-
Sadp020815	Farnesyl acetone	0	Terpenoids	Ditepenoids	C18H30O	263.24	81.07	262.23	[M+H]+	2	1117-52-8	-	93552.7	86419.1	84857	90942.6	39424.7	81402.1	65572	94846.7	67652.2	50005.8	41408.2	51023.4	56274.8	39740.7	67619.5	82976.5	86471.5	59616.2	-	-	-
WapTKC021579	Nepetaracemoside A	0	Terpenoids	Monoterpenoids	C16H24O8	345.16	183.1	344.147	[M+H]+	3	251984-97-1	-	48661.1	37548	5172.36	48546.9	25861.8	48475.5	5172.36	5172.36	5172.36	106464	62146.8	59038.1	95592.4	71250.3	94507.8	49794.1	58871.6	83808.3	-	-	-
WapTKC007329	Austrodorin	0	Terpenoids	Ditepenoids	C23H40O4	381.3	289.25	380.293	[M+H]+	3	169238-54-4	-	43175.7	18259.2	56609.3	21402.8	30610	33813.7	23838.8	21303.7	40353.3	3651.84	3651.84	3651.84	3651.84	3651.84	3651.84	34526.3	43871.8	28961.6	-	-	-
Wdhp004605	7-methoxy-1-[(4-methoxyphenyl)methyl]-2-methyl-3,4-dihydro-1h-isoquinolin-6-ol	0	Alkaloids	Isoquinoline alkaloids	C19H23NO3	314.17	121.06	313.168	[M+H]+	3	-	-	8058.88	8058.88	8058.88	8058.88	8058.88	8058.88	8058.88	8058.88	8058.88	55340.7	40294.4	89089.9	47136.5	54979.7	57174.4	127544	50653.5	94620.7	-	-	-
Lmgp005640	Isorhamnetin-3-O-Galactoside; Cacticin	0	Flavonoids	Flavonols	C22H22O12	479.12	317.07	478.111	[M+H]+	2	6743-92-6	-	291113	221373	230663	408599	440463	443043	392052	457227	311058	428868	426387	557891	660653	717718	455581	516719	395873	558082	-	CM00834	MetMap109
MWSHC2047	(+)-Syringaresinol O-beta-D-glucoside*	0	Lignans and Coumarins	Lignans	C28H36O13	579.21	417.16	580.216	[M-H]-	3	7374-79-0	C10890	51434.3	79317.8	58029.9	120274	120480	120217	119694	99892.7	132042	136321	175274	133205	156961	179059	138653	116580	118204	115127	-	C10890	-
Zken113980	beta-D-Fructose 2-phosphate	0	Others	Saccharides	C6H13O9P	259.02	96.97	260.03	[M-H]-	1	-	C03267	8.42273e+06	8.64667e+06	9.02736e+06	6.09832e+06	6.66248e+06	6.43654e+06	8.06014e+06	7.34389e+06	6.96378e+06	4.98874e+06	5.79903e+06	5.54583e+06	4.44604e+06	4.89138e+06	4.27427e+06	6.46556e+06	6.77882e+06	6.62858e+06	ko00051,ko01100	C03267	-
MWSHC2062	Ferulic β-glucoside*	0	Phenolic acids	Phenolic acids	C16H20O9	355.1	193.05	356.111	[M-H]-	1	14364-12-6	-	1.54943e+06	1.24875e+06	1.13922e+06	1.26677e+06	1.12398e+06	1.15962e+06	1.23142e+06	1.25085e+06	1.495e+06	739395	671635	644032	597074	565764	583708	902944	928571	996261	-	CM02667	MetMap165,MetMap168,MetMap169
Wasn003258	Glucosyl 2-Hydroxy-4-Methylpentanoic Acid	0	Organic acids	Organic acids	C12H22O8	293.12	131.07	294.132	[M-H]-	1	-	-	2.2246e+06	2.2995e+06	2.14558e+06	2.34025e+06	2.16149e+06	2.29512e+06	1.72609e+06	1.76261e+06	1.89448e+06	3.3207e+06	3.37994e+06	3.28985e+06	3.34827e+06	3.15705e+06	3.26448e+06	2.30568e+06	2.66019e+06	2.50084e+06	-	-	-
mws4170	D-Glucose*	0	Others	Saccharides	C6H12O6	179.06	59.01	180.063	[M-H]-	1	50-99-7	C00031	2.36128e+06	2.36482e+06	2.87996e+06	3.12128e+06	3.08154e+06	3.10605e+06	3.24571e+06	3.08967e+06	3.47256e+06	3.43216e+06	3.86918e+06	3.6931e+06	3.61687e+06	4.01806e+06	3.82991e+06	3.00948e+06	2.93646e+06	3.33452e+06	ko00010,ko00030,ko00052,ko00500,ko00520,ko00901,ko01100,ko01110,ko02010,ko04148	C00031	-
pmb3079	N-Acetyl-D-glucosamine 1-phosphate	0	Others	Saccharides	C8H16NO9P	300.05	96.97	301.056	[M-H]-	3	6866-69-9	C04256	128206	96231.3	144657	128847	105770	132341	103630	120015	135889	106268	77526.7	96993.9	84784.3	86256.8	94707.6	103280	116750	91955.1	-	C04256	-
pmb2922	UDP-glucose	0	Nucleotides and derivatives	Nucleotides and derivatives	C15H24N2O17P2	565.05	323.03	566.055	[M-H]-	2	133-89-1	C00029	2.95083e+06	3.05122e+06	3.48899e+06	2.57985e+06	3.03692e+06	2.68376e+06	2.79347e+06	2.14458e+06	2.90275e+06	2.03542e+06	2.53174e+06	1.91767e+06	1.77627e+06	2.68171e+06	2.00057e+06	2.79681e+06	2.60473e+06	2.586e+06	ko00040,ko00052,ko00053,ko00500,ko00520,ko00561,ko00908,ko01100,ko01110,ko01240,ko01250	C00029	-
Walbn00429	Malic acid-1-O-glucopyranoside	0	Organic acids	Organic acids	C10H16O10	295.07	115	296.074	[M-H]-	3	-	-	58576.7	65050.4	72195.2	59505	57872.8	100897	85850.5	69701.9	71746.9	78142.3	125257	102259	89036.1	100264	93116.4	110198	77632.9	43981.8	-	-	-
Lcsn000415	3-Deoxy-D-glycero-D-galacto-non-2-ulopyranosonate	0	Lipids	Free fatty acids	C9H16O9	267.07	59.01	268.079	[M-H]-	2	153666-19-4	C20934	62415.8	76706.9	58766.4	72737.6	96230.2	80726.8	107652	105650	86264.8	89698.8	131232	133515	116877	141723	106138	95388.1	106574	91024.8	ko00520,ko01100,ko01250	C20934	-
MWSmce339	2-Methoxycinnamic acid	0	Phenolic acids	Phenolic acids	C10H10O3	177.06	133.07	178.063	[M-H]-	3	6099-03-2	-	208774	246185	235781	196576	213511	213050	207292	202455	216780	217485	188462	199874	188871	177272	175918	184267	202434	197289	-	CM02609	MetMap166
mws1089	Sucrose 6-phosphate	0	Others	Saccharides	C12H23O14P	421.08	241.01	422.082	[M-H]-	3	22372-29-8	C16688	208543	227984	172263	208609	156675	141666	189942	169328	152533	108787	125193	152947	131977	139088	137078	172497	163142	210873	ko00500	C16688	-
MWSmce583	Piperonylic acid	0	Phenolic acids	Phenolic acids	C8H6O4	165.02	91.02	166.027	[M-H]-	3	94-53-1	-	132501	164915	174161	139608	120716	121051	138247	144723	126888	146364	99037.9	117187	115326	94119.9	123514	81645	93656.7	89890.5	-	-	-
mws0704	Ethanolamine phosphate	0	Alkaloids	Alkaloids	C2H8NO4P	140.01	78.96	141.019	[M-H]-	3	1071-23-4	C00346	61029.2	56350.9	56640.7	40641.7	44224.2	44006.4	52543.4	40920.6	49335.1	33741.7	34462.3	34945	40608.1	37079.2	35748.9	46819.4	46966.2	48816.9	ko00563,ko00564,ko00600,ko01100	C00346	-
Wasyqn4894	1-Hexanol Rhamnosylglucoside	0	Others	Alcohol compounds	C18H34O10	469.23	263.15	410.215	[M+CH3COO]-	3	-	-	37619.3	66536.8	42124.1	65499.5	57227.9	66781.8	27579.3	37903	70538.3	95235.9	87164.7	44089.8	69495.3	64264	71593.9	46514.4	65312.7	37832.5	-	-	-
Saln001520	Teuhircoside	0	Terpenoids	Monoterpenoids	C15H20O9	343.1	181.05	344.111	[M-H]-	3	-	-	621901	748057	653202	816154	805388	850423	938354	940664	998319	1.05636e+06	1.16923e+06	1.22741e+06	1.0868e+06	1.32325e+06	1.18073e+06	893514	968321	870835	-	-	-
Zamn00402	sorbose*	0	Others	Saccharides	C6H12O6	179.06	59.01	180.063	[M-H]-	1	-	-	2.50043e+06	2.59416e+06	2.38416e+06	2.86408e+06	3.10037e+06	2.96922e+06	3.03437e+06	3.15364e+06	3.02447e+06	3.10364e+06	3.58982e+06	3.61914e+06	3.49849e+06	3.75472e+06	3.47239e+06	2.90113e+06	3.0275e+06	3.10183e+06	-	-	-
pme2435	L-Fucose*	0	Others	Saccharides	C6H12O5	163.06	59.01	164.069	[M-H]-	3	-	C01019	147077	169244	201450	92932.4	182562	125893	175819	193723	170896	116036	92146.4	101247	95481	81734.3	86628.7	164856	147685	107226	ko00051,ko00520,ko01100,ko01250	C01019	-
mws0854	L-Rhamnose*	0	Others	Saccharides	C6H12O5	163.06	59.01	164.069	[M-H]-	3	3615-41-6	C00507	112452	141993	190430	125697	142391	100723	168407	143327	130145	56094.2	79358.1	116565	75610.2	92932.6	80308.4	133052	137548	125263	ko00051,ko01100	C00507	-
Wchn003892	Juglanoside E	0	Others	Others	C16H20O9	355.11	193.05	356.111	[M-H]-	2	-	-	1.62555e+06	1.13178e+06	1.24918e+06	1.29212e+06	1.12777e+06	1.08065e+06	1.2224e+06	1.36011e+06	1.50689e+06	724482	587526	697681	599538	501966	536401	955974	1.09467e+06	1.03049e+06	-	-	-
mws1164	D-Fructose*	0	Others	Saccharides	C6H12O6	179.06	59.01	180.063	[M-H]-	1	57-48-7	C05003	2.42952e+06	2.45071e+06	2.17568e+06	2.89037e+06	2.968e+06	3.13507e+06	3.15975e+06	2.94628e+06	3.16154e+06	3.18669e+06	3.40198e+06	3.46519e+06	3.55085e+06	3.69936e+06	3.56078e+06	2.94789e+06	3.15843e+06	2.9348e+06	-	C05003	-
Hmln000297	myo-Inositol*	0	Others	Saccharides	C6H12O6	179.05	59.01	180.063	[M-H]-	1	87-89-8	C00137	2.44071e+06	2.36087e+06	2.4514e+06	2.94227e+06	3.2027e+06	2.88772e+06	3.00459e+06	2.8786e+06	3.01215e+06	2.97813e+06	3.59226e+06	3.53299e+06	3.93122e+06	4.08872e+06	4.15594e+06	3.10241e+06	3.12057e+06	2.90008e+06	ko00052,ko00053,ko00562,ko01100,ko01110,ko01250,ko02010,ko04070	C00137	-
Wahsn02657	1-O-p-Coumaroyl Octose	0	Phenolic acids	Phenolic acids	C17H22O10	385.11	163.04	386.121	[M-H]-	2	-	-	13653.8	10630.8	9877.95	14840.6	18110.2	14681.5	18751.5	18537.8	21423.9	19698.9	34855.6	27932.4	28193.3	27938.4	30785.6	24266.2	21806	18178.5	-	-	-
MWSmce678	Deoxyarbutin	0	Phenolic acids	Phenolic acids	C11H14O3	193.09	108.02	194.094	[M-H]-	3	53936-56-4	-	924339	957094	1.00592e+06	983621	970740	998988	973785	881014	958704	921304	861912	793475	850133	864555	876189	894803	911869	904001	-	-	-
Zjbn102534	2,7-Dihydroxy-3,5-dimethoxy-9,10-dihydrophenanthrene	0	Others	Others	C16H16O4	271.1	241.05	272.105	[M-H]-	3	108853-10-7	-	29778.4	36773.3	32492.8	22419.2	24670.3	20976.6	20296.9	15824.2	23788.9	15952.6	15550.2	20206.4	5152.65	6746.12	4935.59	16449.4	18681.5	19822.1	-	CM02196	MetMap162
Wdbn007622	Stilbostemin Q	0	Others	Stilbene	C16H18O4	273.12	122.04	274.12	[M-H]-	2	-	-	15168.2	15481.7	20851.5	8520.85	10720.8	12484.6	13375.4	13324.7	13041.9	8267.2	10296	7848.7	1569.74	1569.74	1569.74	12576	14555.8	12768.9	-	-	-
pmn001382	Isochlorogenic acid A*	0	Phenolic acids	Phenolic acids	C25H24O12	515.12	353.09	516.127	[M-H]-	3	2450-53-5	-	39625	39454.5	65050.1	30949.6	24533.3	37926.6	27289.8	23202	25236	4640.41	4640.41	4640.41	4640.41	4640.41	4640.41	45315	24842.7	31341.9	-	-	-
Wahln04592	3,7-Dimethyl-5-Oxo-2,6-Octadien-1-Yl]Beta-D-Glucopyranoside	0	Terpenoids	Monoterpenoids	C16H26O7	389.18	161.05	330.168	[M+CH3COO]-	1	-	-	1233.62	1233.62	1233.62	6168.08	9182.52	8334.93	10442.5	13079.2	11435.7	21947.9	13382.5	35309.6	25440	34087.5	15209.1	14862.5	15264	23238.8	-	-	-

## Sheet: Black
nodeName	Compounds	degree	ClassⅠ	ClassⅡ	Formula	Q1 (Da)	Q3 (Da)	Molecular weight (Da)	Ionization model	Level	CAS	cpd_ID	120DAI_1	120DAI_2	120DAI_3	180DAI_1	180DAI_2	180DAI_3	240DAI_1	240DAI_2	240DAI_3	300DAI_1	300DAI_2	300DAI_3	360DAI_1	360DAI_2	360DAI_3	QC01	QC02	QC03	kegg_map	mw_cpd_ID	mw_map
Zmxn110201	2,6-Dimethoxy-4-hydroxyphenol-1-O-ß-D-glucopyranoside	17	Others	Others	C14H20O9	331.1	108.02	332.111	[M-H]-	1	-	-	455005	476735	476429	751242	744534	796320	1.06646e+06	1.06697e+06	1.10653e+06	1.30686e+06	1.33127e+06	1.37496e+06	1.14919e+06	1.32492e+06	1.14705e+06	1.01861e+06	947883	982261	-	-	-
Wcdn001824	2,5-Dihydroxybenzoic acid-5-O-glucoside*	15	Phenolic acids	Phenolic acids	C13H16O9	315.07	153.02	316.079	[M-H]-	1	-	-	1.74802e+06	2.0158e+06	1.81721e+06	1.74854e+06	1.72458e+06	1.81512e+06	2.64125e+06	2.62231e+06	2.61307e+06	4.95448e+06	5.1183e+06	5.09509e+06	3.52634e+06	3.44213e+06	2.85057e+06	3.15894e+06	3.06274e+06	2.99192e+06	-	-	-
Wahln02444	Hydroxytyrosol Glucoside*	15	Others	Alcohol compounds	C14H20O8	315.11	153.06	316.116	[M-H]-	2	76873-99-9	-	1.74295e+06	1.92644e+06	1.69461e+06	1.73472e+06	1.74589e+06	1.78457e+06	2.65452e+06	2.61125e+06	2.56664e+06	4.98874e+06	5.35447e+06	5.28297e+06	3.6742e+06	3.49223e+06	3.21116e+06	3.12023e+06	3.13869e+06	3.11577e+06	-	-	-
Ymjm000152	p-Hydroxypheny-β-D-allopyranoside*	12	Others	Others	C12H16O7	271.08	108.02	272.09	[M-H]-	1	-	-	1.03074e+06	1.02131e+06	959236	1.44907e+06	1.50559e+06	1.61581e+06	2.14868e+06	2.1771e+06	2.25475e+06	2.57288e+06	2.77894e+06	2.92324e+06	2.35561e+06	2.54771e+06	2.30564e+06	2.03167e+06	1.9926e+06	2.01756e+06	-	-	-
Zmjp010694	5-Hydroxy-3,7,3',4'-tetramethoxyflavone (Retusin)	11	Flavonoids	Flavones	C19H18O7	359.11	344.09	358.105	[M+H]+	1	1245-15-4	-	848118	781593	861926	2.06072e+06	2.08519e+06	1.92196e+06	2.63231e+06	2.31884e+06	2.2956e+06	4.56045e+06	4.61607e+06	4.98371e+06	2.79913e+06	3.0787e+06	2.79914e+06	2.67967e+06	2.83078e+06	2.70793e+06	-	-	-
MWStz489	Gardenin B*	9	Flavonoids	Flavones	C19H18O7	359.11	329.07	358.105	[M+H]+	2	2798-20-1	C15109	106191	106857	122272	285701	260287	274737	320264	325118	323848	586489	693958	639902	379207	409789	362787	335338	354477	361227	-	C15109	-
pmn001553	Cimidahurinine*	9	Others	Alcohol compounds	C14H20O8	315.11	153.06	316.116	[M-H]-	2	142542-89-0	-	3.01014e+06	2.95389e+06	2.86851e+06	2.86391e+06	2.72357e+06	2.63341e+06	4.18054e+06	3.97916e+06	4.14206e+06	7.46637e+06	7.89332e+06	7.80621e+06	6.00313e+06	5.85689e+06	4.95115e+06	4.81793e+06	4.49896e+06	4.64807e+06	-	CM02880	MetMap172
Labn002264	Grevilloside G	8	Phenolic acids	Phenolic acids	C14H20O8	315.11	153.05	316.116	[M-H]-	2	791846-69-0	-	1.68041e+06	1.76531e+06	1.50392e+06	1.59575e+06	1.51051e+06	1.64237e+06	2.4507e+06	2.42425e+06	2.28859e+06	4.55045e+06	4.41119e+06	4.6928e+06	3.54632e+06	3.60102e+06	2.78723e+06	2.6941e+06	2.73826e+06	2.86157e+06	-	-	-
Yacp008636	Icariside E4	7	Lignans and Coumarins	Lignans	C26H34O10	507.23	238.12	506.215	[M+H]+	2	126253-42-7	-	83872.3	101789	92015.7	42669.4	26836.5	21366.8	17556	21482.8	21792.5	736343	757095	797944	351499	471712	355587	208900	276442	253861	-	-	-
Zmln000899	Syringaldehyde-4-O-glucoside	7	Others	Aldehyde compounds	C15H20O9	343.11	181.05	344.111	[M-H]-	2	-	-	557666	559805	553766	534843	573639	634443	731403	623830	652598	942020	991617	1.02422e+06	833035	807691	743179	775898	807820	838599	-	-	-
MWSmce675	Arbutin*	7	Others	Others	C12H16O7	271.08	108.02	272.09	[M-H]-	1	497-76-7	C06186	1.07456e+06	1.09352e+06	1.03022e+06	1.57471e+06	1.57194e+06	1.68413e+06	2.39984e+06	2.36088e+06	2.46876e+06	2.78864e+06	2.94445e+06	3.1645e+06	2.36891e+06	2.74256e+06	2.43361e+06	2.17995e+06	2.15152e+06	2.20514e+06	ko00010	C06186	-
WapTKC017660	Sarcophyton D	6	Terpenoids	Ditepenoids	C20H34O2	307.26	81.07	306.256	[M+H]+	3	1622158-19-3	-	2070.89	2070.89	2070.89	2070.89	2070.89	2070.89	2070.89	2070.89	2070.89	22317.6	16749	32749.9	17318.3	12604.3	10354.4	12963.4	20735.9	18236.5	-	-	-
Walbn03092	Neocarthamin*	6	Flavonoids	Flavanones	C21H22O11	449.11	287.06	450.116	[M-H]-	1	-	C17675	132717	131705	112051	115945	122514	116436	163629	179785	196677	322182	233151	288472	185204	195799	189446	165830	219161	158069	-	C17675	-
MWStz409	3,3',4',5,6,7,8-heptamethoxyflavone	5	Flavonoids	Flavonols	C22H24O9	433.15	403.11	432.142	[M+H]+	3	1178-24-1	-	9562.91	15468.9	24192.5	5076	10697.5	14058	4737.46	15125	9776.11	80834.9	64063.5	73626.1	43619.1	64207.8	19670.4	36469.5	33533.7	47593.9	-	-	-
Lmtn002796	Aromadendrin-7-O-glucoside*	5	Flavonoids	Flavanonols	C21H22O11	449.11	287.06	450.116	[M-H]-	1	28189-90-4	-	112447	143275	122875	125682	128612	114423	190874	185765	181953	287344	259236	287746	182667	204272	200955	187568	218528	123229	-	CM00465	MetMap114
Zkep02152	Cyclic AMP*	3	Nucleotides and derivatives	Nucleotides and derivatives	C10H12N5O6P	330.06	136.06	329.053	[M+H]+	1	-	-	429297	449339	392211	313264	380979	377856	289621	259875	283659	168346	162511	182388	268271	260002	231182	360510	333682	299059	-	-	-
PDP090282	Pyroglutamylvaline	3	Amino acids and derivatives	Amino acids and derivatives	C10H16N2O4	229.12	72.08	228.111	[M+H]+	3	21282-10-0	-	64897.5	97372.4	76421.8	49994.6	49711.9	44898.1	47346.9	34459.1	53614.1	173905	235279	212077	116642	134837	150098	84265.3	74768.3	99220.1	-	-	-
Sadp001677	3-O-Methyl-a-methyldopa*	3	Amino acids and derivatives	Amino acids and derivatives	C10H13NO4	212.09	149.06	211.084	[M+H]+	1	-	-	320062	295326	251489	381324	364986	367060	628918	684582	624491	702809	752850	865299	567740	625884	594427	564527	523288	545803	-	-	-
Smnp003415	7-O-Methylaloesin	3	Flavonoids	Other Flavonoids	C20H24O9	409.15	247.09	408.142	[M+H]+	3	-	-	113371	122809	87269.2	70886	224262	211910	465736	429838	318179	628791	589518	860199	443755	551350	516734	380035	222555	446310	-	-	-
PDP001012	3'(R)-O-β-D-glucopyranosyl-3',4'-dihydroxanthyletin*	3	Lignans and Coumarins	Coumarins	C20H24O9	409.15	247.1	408.142	[M+H]+	3	-	-	94332.4	34973.1	89767.5	77792.8	226312	180414	331959	304543	327142	803485	376748	649107	428305	508024	463945	341418	185811	381915	-	-	-
mws1474	3',4',5'-O-Trimethyltricetin	3	Flavonoids	Flavones	C18H16O7	345.1	284.07	344.09	[M+H]+	3	18103-42-9	C19807	1.45984e+06	1.45984e+06	1.45984e+06	1.45984e+06	1.45984e+06	1.45984e+06	7.67543e+06	9.58254e+06	8.97864e+06	1.24943e+07	1.11087e+07	1.27967e+07	8.20895e+06	9.65255e+06	8.71467e+06	1.02151e+07	9.5034e+06	7.29921e+06	-	C19807	-
zjsp010407	1,7-bis(4-hydroxyphenyl)-3-heptanone	3	Others	Others	C19H22O3	299.16	107.05	298.157	[M+H]+	3	-	-	29445.3	26374.4	36965.4	18650.6	24905.8	11916.7	12001.5	15123	19167.7	1577.57	1577.57	1577.57	11762.4	11774	7887.87	36791.7	59537.8	40170.5	-	-	-
Lmsn003297	2',3,4,4',6'-Peptahydroxychalcone 4'-O-glucoside*	3	Flavonoids	Chalcones	C21H22O11	449.11	287.06	450.116	[M-H]-	1	-	C16408	141141	109878	92123.9	121100	140880	84656.5	202664	174062	201505	300229	294497	281617	193836	193693	197030	160133	181532	191260	ko00941,ko01110	C16408	-
Waptn02692	3-(3,4-dihydroxyphenyl)propanoic acid glucoside*	3	Phenolic acids	Phenolic acids	C15H20O9	343.1	181.05	344.111	[M-H]-	1	-	-	607580	676993	623828	794797	744665	910566	942932	929426	947598	1.05734e+06	1.10482e+06	1.11838e+06	1.0318e+06	1.14528e+06	1.16551e+06	888391	891392	864413	-	-	-
MWSslk186	8-O-Acetylharpagide	3	Terpenoids	Monoterpenoids	C17H26O11	405.14	165.06	406.147	[M-H]-	3	6926-14-3	-	14931.9	8536.59	17830.3	28581.7	16752.7	23809.8	44237	48310.7	57541.2	82136.7	66890	79938.8	78166.1	71341.1	86362.6	56103	28599.1	70309.9	-	-	-
PDP239672	D-2-Aminobutyrate	2	Alkaloids	Alkaloids	C4H9NO2	104.07	58.06	103.063	[M+H]+	3	2623-91-8	C02261	3.25021e+07	3.10745e+07	2.76266e+07	2.4626e+07	2.22309e+07	2.58947e+07	2.22985e+07	1.85908e+07	2.01465e+07	1.04745e+07	1.41013e+07	1.56931e+07	1.54033e+07	1.55637e+07	1.28406e+07	2.38739e+07	2.54409e+07	2.3858e+07	-	C02261	-
pmb0484	Choline	2	Alkaloids	Alkaloids	C5H14NO+	104.11	60.08	104.107	[M]+	3	62-49-7	C00114	4.99185e+07	4.80753e+07	4.43721e+07	3.8413e+07	3.45516e+07	4.21556e+07	3.30372e+07	3.15663e+07	3.15074e+07	1.57874e+07	2.14523e+07	2.45683e+07	2.54012e+07	2.30903e+07	2.04623e+07	3.55737e+07	3.64463e+07	3.16973e+07	ko00260,ko00564,ko01100,ko02010	C00114	-
Zbfp001070	N-(1-Deoxy-1-fructosyl)phenylalanine	2	Amino acids and derivatives	Amino acids and derivatives	C18H17NO5	328.12	166.07	327.111	[M+H]+	3	-	-	474343	485190	671554	861952	837949	756553	855322	879982	1.23037e+06	1.15761e+06	1.43248e+06	1.2002e+06	1.15095e+06	1.3214e+06	1.02566e+06	1.20441e+06	978154	1.13979e+06	-	-	-
pmp000169	Andrographidine D aglycone*	2	Flavonoids	Flavanones	C19H18O7	359.11	329.06	358.105	[M+H]+	2	-	-	81184.9	93269.4	107588	187489	225872	223386	288023	281129	250934	441432	591764	598710	320662	368930	276464	271061	291831	327147	-	-	-
pme3033	N,N-Dimethylglycine*	2	Amino acids and derivatives	Amino acids and derivatives	C4H9NO2	104.07	58.07	103.063	[M+H]+	3	1118-68-9	C01026	8.51426e+06	8.9477e+06	7.79777e+06	7.35222e+06	7.50563e+06	7.89332e+06	6.21194e+06	6.39886e+06	6.39337e+06	3.83015e+06	4.97501e+06	4.55371e+06	4.86357e+06	5.1019e+06	4.13865e+06	7.05654e+06	7.59507e+06	7.41591e+06	ko00260,ko01100	C01026	-
pmd0142	LysoPC 20:0(2n isomer)	2	Lipids	LPC	C28H58NO7P	552.4	184.07	551.395	[M+H]+	3	-	-	14941	30208.3	15105	27095.5	24406.2	31372	34988.6	35600.2	39214.3	58561.7	53731.5	69126	36311.4	52980.5	23625.5	54285.4	37012.5	36053.2	-	-	-
MWStz460	Ombuin	2	Flavonoids	Flavonols	C17H14O7	331.08	316.06	330.074	[M+H]+	3	529-40-8	-	108224	108224	108224	108224	108224	108224	555972	578694	573672	804648	775383	691507	560741	691432	541122	660975	780764	709086	-	-	-
MWSmce248	trans-3-Hydroxycinnamate*	2	Phenolic acids	Phenolic acids	C9H8O3	163.04	119.05	164.047	[M-H]-	1	14755-02-3	C12621	416248	373335	363620	510403	437576	450241	468902	532877	520801	608222	736253	738973	483723	508123	497398	498341	488948	462083	ko00360,ko01100	C12621	MetMap166
Lmmn001643	trans-2-Hydroxycinnamate*	2	Phenolic acids	Phenolic acids	C9H8O3	163.04	119.05	164.047	[M-H]-	1	583-17-5	C01772	398511	371603	421751	540672	477353	537055	623174	551447	586773	783814	841342	759786	558424	525725	608869	571272	537613	475547	ko00360,ko00999,ko01100,ko01110	C01772	MetMap166
Sasn005034	Gibboside*	2	Terpenoids	Monoterpenoids	C16H26O9	361.15	199.1	362.158	[M-H]-	2	-	-	95786.5	53205.4	47389.2	71165.5	71168.2	58704.9	178342	139535	152809	324589	264776	245873	160913	209076	227610	136803	118552	149303	-	-	-
pme3163	Sedoheptulose 7-phosphate	2	Others	Saccharides	C7H15O10P	289.03	96.97	290.04	[M-H]-	3	2646-35-7	C05382	892126	925891	1.02402e+06	800420	893599	1.00359e+06	933073	878563	870360	542336	495743	609278	927116	640101	685757	807285	827332	797054	ko00030,ko00710,ko01100,ko01110,ko01200,ko01230,ko01250	C05382	-
MWS2413	N-Acetyl-beta-alanine	2	Amino acids and derivatives	Amino acids and derivatives	C5H9NO3	130.05	58.03	131.058	[M-H]-	3	3025-95-4	C01073	14080.9	24015.2	15936.2	18171.7	23457.5	12633.3	23977.9	17952.6	21114.5	27525.6	39541.1	32421.8	24706.4	23218.5	25558.7	19454.2	27663.2	28397.8	ko00410	C01073	-
Lmbn000193	2-Hydroxy-3-oxopropanoate*	2	Organic acids	Organic acids	C3H4O4	103	59.01	104.011	[M-H]-	3	2480-77-5	C01146	60194.3	54340.5	70440.8	45301.1	54987.5	43124.3	44159	40682.4	48224	27439.6	30255.4	24629.5	34449.3	40781.7	33506	44258.6	40940.2	32053.6	ko00053,ko00630,ko01100	C01146	-
MWSmce585	Methyl 3-aminopropanoate	1	Amino acids and derivatives	Amino acids and derivatives	C4H9NO2	104.07	59.01	103.063	[M+H]+	3	4138-35-6	-	4.04465e+06	4.11615e+06	3.16843e+06	3.262e+06	3.36125e+06	3.65631e+06	2.7813e+06	2.71858e+06	2.91543e+06	1.2354e+06	1.8083e+06	1.83139e+06	1.72653e+06	1.90173e+06	1.53113e+06	2.96441e+06	3.26887e+06	3.07573e+06	-	-	-
Sazp011041	Phyllnirurin*	1	Lignans and Coumarins	Lignans	C20H22O5	343.15	163.07	342.147	[M+H]+	1	120396-53-4	-	5.46601e+06	5.60703e+06	5.25952e+06	4.58669e+06	4.58912e+06	5.65384e+06	4.24261e+06	4.7544e+06	4.70698e+06	3.73021e+06	4.06614e+06	4.28263e+06	4.11822e+06	4.17743e+06	4.16137e+06	3.89817e+06	4.6297e+06	4.09306e+06	-	-	-
MWS20172	5-Hydroxymethyl-2-furaldehyde*	1	Others	Aldehyde compounds	C6H6O3	127.04	53.04	126.032	[M+H]+	1	67-47-0	C11101	148239	205867	158341	156983	124771	114401	99858.9	113763	77638.8	61177.5	80883	74486.5	46674.5	108961	71612.6	47574.4	130111	88313.7	-	C11101	-
Saln003891	Suspensoside A	1	Terpenoids	Monoterpenoids	C16H26O9	361.15	155.11	362.158	[M-H]-	1	-	-	247888	204176	250160	269080	217427	265889	547383	492211	518844	1.03479e+06	786154	1.04516e+06	702084	842008	909155	469920	523444	543988	-	-	-
Wasn003817	Glucosyl 5,8-dihydroxy-2,6-dimethylocta-2,6-dienoic acid	1	Terpenoids	Monoterpenoids	C16H26O9	361.15	199.1	362.158	[M-H]-	2	-	-	20760.9	16156.7	20404.5	41487.3	14541.1	22255.1	50266.3	56558.3	67634.4	75660.7	121277	141846	51892.8	57006.6	28920.2	63515.4	33749.2	38192	-	-	-
Sasp007990	Myristoyl Ethanolamide	0	Lipids	Sphingolipids	C16H33NO2	272.26	100.08	271.251	[M+H]+	1	142-58-5	-	102589	92853.8	125219	109955	107791	91262	119092	124712	113473	136651	181196	131489	185594	109402	105869	190384	157236	174754	-	-	-
MWS1743	alpha-hexylcinnamaldehyde	0	Phenolic acids	Phenolic acids	C15H20O	217.16	129.07	216.151	[M+H]+	3	101-86-0	-	423835	389421	358380	373432	336000	322850	309009	266641	297779	284287	242655	240425	276210	248730	205610	248886	337874	252757	-	CM02624	MetMap166
Wcdp011414	Erucamide	0	Others	Others	C22H43NO	338.34	303.3	337.334	[M+H]+	2	112-84-5	-	7.73757e+06	7.26046e+06	1.17894e+07	7.45699e+06	1.04522e+07	9.28587e+06	7.51447e+06	1.07331e+07	1.00388e+07	1.2343e+07	1.73632e+07	1.18554e+07	9.4663e+06	1.49e+07	1.00794e+07	8.7862e+06	1.20419e+07	1.36954e+07	-	-	-
PDP225335	(2,3,4,5-tetrahydroxyhexyl)oxyphosphonic acid	0	Others	Saccharides	C6H15O8P	247.06	98.98	246.05	[M+H]+	3	-	-	265883	292500	262435	199421	276987	261659	264625	153089	300712	148264	147031	109277	204815	253439	146345	320558	177187	267584	-	-	-
PD0904567	Threoninyl-Proline	0	Amino acids and derivatives	Amino acids and derivatives	C9H16N2O4	217.12	116.07	216.111	[M+H]+	3	-	-	142184	160986	140577	151742	124174	196951	117671	130244	124958	99269.7	83268.7	87872.8	80043.8	126684	112297	134075	156387	236605	-	-	-
Sadp007055	Indole-3-acetyl-L-glutamic acid	0	Amino acids and derivatives	Amino acids and derivatives	C15H16N2O5	305.11	130.06	304.106	[M+H]+	3	-	-	405572	302596	256651	627465	269143	299580	448179	421218	496313	607940	769974	602436	588303	510711	517885	369835	521253	350219	-	-	-
PDP171347	8'-methylspiro[cyclohexane-1,4'-tricyclo[6.3.1.02,5]dodecane]-1'-ol	0	Others	Others	C18H30O	263.24	81.07	262.23	[M+H]+	1	-	-	740352	794172	383085	668236	570505	545064	380092	614566	372429	276166	242053	273207	277759	350754	335109	464816	591293	491068	-	-	-
Zahp007439	3,4-Methylenedioxycinnamaldehyde	0	Others	Aldehyde compounds	C10H8O3	177.05	149.02	176.047	[M+H]+	1	58095-77-5	-	708471	710977	707257	725381	734157	739081	772389	723970	642148	448521	593082	574782	582532	610360	607678	421893	459489	359320	-	-	-
Lmhp009384	1-Linoleoylglycerol-2,3-di-O-glucoside*	0	Lipids	Glycerol ester	C33H58O14	679.39	263.24	678.383	[M+H]+	1	-	-	242620	98315.5	86491	111162	140119	151844	124085	161915	134114	74511.2	50475.4	78317.5	114505	114924	90893.9	151816	148120	213933	-	-	-
PDP256276	6-amino-9-[(2R,3R,4S,5R)-3,4-dihydroxy-5-(hydroxymethyl)oxolan-2-yl]-8H-purin-2-one*	0	Nucleotides and derivatives	Nucleotides and derivatives	C10H13N5O5	284.1	152.06	283.092	[M+H]+	3	-	-	3.23125e+06	3.71945e+06	2.98307e+06	3.26674e+06	3.46877e+06	3.22686e+06	3.28592e+06	3.8723e+06	3.4472e+06	3.55773e+06	3.55181e+06	3.77736e+06	3.40788e+06	3.5872e+06	3.32204e+06	3.74414e+06	3.4736e+06	3.5288e+06	-	-	-
Lhfp112926	Myricatomentogenin*	0	Others	Others	C20H22O5	343.15	163.08	342.147	[M+H]+	1	-	-	3.92675e+06	3.48376e+06	3.82762e+06	3.56102e+06	3.7546e+06	3.29955e+06	3.57675e+06	3.68426e+06	3.05864e+06	3.06228e+06	3.04896e+06	2.90398e+06	3.32699e+06	3.23886e+06	2.89619e+06	2.95115e+06	3.32021e+06	2.93313e+06	-	-	-
Zmyp00400	(hexahydro-1H-pyrrolizin-1-yl)methanol	0	Alkaloids	Pyrrole alkaloids	C8H15NO	142.12	100.08	141.115	[M+H]+	3	28639-18-1	-	68438.2	79582.5	82488	76594.8	82789.9	54670	84334.6	65671.4	66032.6	37324.3	43956.3	54234.6	50121.8	72570.6	61058.7	61996.1	85395.8	85017	-	-	-
MW0150424	Gly-Lys-Met	0	Amino acids and derivatives	Amino acids and derivatives	C13H26N4O4S1	335.17	147.04	334.168	[M+H]+	3	-	-	1.07918e+07	9.67518e+06	8.92801e+06	1.09096e+07	1.12094e+07	9.13253e+06	1.04422e+07	1.12993e+07	1.22855e+07	1.29002e+07	1.21526e+07	1.36199e+07	1.11424e+07	1.34869e+07	8.11892e+06	8.25812e+06	1.37522e+07	7.35067e+06	-	-	-
Wagp002617	D-Glucosyl Indole-3-Carboxylate	0	Alkaloids	Plumerane	C15H17NO7	324.11	162.06	323.101	[M+H]+	1	-	-	976372	1.08038e+06	880434	1.25994e+06	1.401e+06	1.39362e+06	1.2423e+06	1.22305e+06	1.22161e+06	1.74149e+06	1.95843e+06	2.09579e+06	1.01004e+06	1.9511e+06	1.58563e+06	1.30174e+06	1.40683e+06	1.2989e+06	-	-	-
pmp001080	Diosmetin-7-O-Neohesperidoside (Neodiosmin)	0	Flavonoids	Flavones	C28H32O15	609.18	301.07	608.174	[M+H]+	3	38665-01-9	-	70602.7	39221.7	47205.9	58359.3	32867.1	33294.2	85452	67734	79061.9	163393	93933.7	111799	37040.3	131981	104260	135246	103799	72167.8	-	-	-
Rfn07779	Tamaridone	0	Flavonoids	Flavones	C17H14O7	331.08	316.06	330.074	[M+H]+	2	-	-	1.57195e+06	1.50628e+06	1.35201e+06	1.9434e+06	2.12085e+06	1.64556e+06	1.66653e+06	1.93529e+06	2.04619e+06	2.9584e+06	2.50007e+06	2.64212e+06	2.12059e+06	2.45971e+06	2.14349e+06	2.81353e+06	2.65716e+06	2.2572e+06	-	-	-
Wasdp02609	8-(1-hydroxyethyl)chromen-2-one*	0	Lignans and Coumarins	Coumarins	C11H10O3	191.07	147.04	190.063	[M+H]+	1	-	-	1.06733e+06	1.30115e+06	981493	1.02279e+06	904892	1.23363e+06	1.29094e+06	1.08856e+06	1.03292e+06	537540	483677	512097	686837	635554	1.18742e+06	1.37857e+06	954293	1.36949e+06	-	-	-
pma0149	Sinapoyl malate	0	Phenolic acids	Phenolic acids	C15H16O9	341.09	207.07	340.079	[M+H]+	3	92344-58-6	C02887	38099.5	14823.1	22138.2	56934.2	25948.9	75323.5	75591.9	88684.7	77866	181699	81847.7	116288	106938	68478.1	40577.4	42611	70952.2	68716.1	ko00940,ko01110	C02887	MetMap153
Qmjp110213	(S)-N-Methylcoclaurine	0	Alkaloids	Isoquinoline alkaloids	C18H21NO3	300.16	107.05	299.152	[M+H]+	3	1472-62-4	C05176	15389.5	39206.6	71982.1	31209.1	21105.5	57544.2	34582.4	47549.3	31371.5	2274.67	2274.67	2274.67	32280.8	11373.4	22311.7	50086.3	41433.6	36465.9	ko00950,ko01100,ko01110	C05176	-
MWS0700	Neopterin	0	Alkaloids	Alkaloids	C9H11N5O4	254.09	206.07	253.081	[M+H]+	3	2009-64-5	C05926	17086.7	14124.2	12579.3	17323.5	5457.06	12485.9	21433.7	11584.8	9848.04	26774.7	17055.6	24972.4	14315.9	17768.4	23273.7	16215	12482.9	16988.5	ko00790	C05926	-
PDP058220	3,6,7,4'-tetramethylquercetagetin 3'-O-beta-D-glucoside	0	Flavonoids	Flavonols	C25H28O13	537.16	375.1	536.153	[M+H]+	3	-	-	20640.5	38572.7	22234.2	44672.5	52833.5	32039.6	39632.2	69334.9	95186.3	86945.7	106392	115537	53701.7	72020.2	43731.2	67590.8	55609.2	58985.6	-	-	-
WapTKC188261	5-[(E)-5-[(4aS,8aS)-2,5,5,8a-tetramethyl-3,4,4a,6,7,8-hexahydronaphthalen-1-yl]-3-(hydroxymethyl)pent-2-enylidene]-4-methylfuran-2-one	0	Terpenoids	Ditepenoids	C25H36O3	385.27	135.12	384.266	[M+H]+	2	-	-	44389.9	31583.9	32958.7	25558.7	25807.2	17743.6	15800.2	18186.9	53245.8	1121.66	1121.66	1121.66	18833.4	33694.4	5608.3	47070.5	70229.3	43940.8	-	-	-
pmb0496	Feruloylagmatine	0	Alkaloids	Phenolamine	C15H22N4O3	307.18	177.05	306.169	[M+H]+	3	-	C18325	51084.2	38719.1	17930.6	22544.4	37549.7	27153.4	38963.8	15746.7	32051.6	2806.52	2806.52	2806.52	14032.6	17570.2	30069.7	26111.4	17911.9	16831.5	ko00999,ko01100,ko01110	C18325	-
mws0208	Adipate*	0	Organic acids	Organic acids	C6H10O4	145.05	101.06	146.058	[M-H]-	3	124-04-9	C06104	372502	395616	377532	414609	414932	447949	457343	458004	396016	512890	523901	588690	338908	527728	511661	299324	302248	268736	ko01100	C06104	-
mws0924	2-Methylglutaric acid*	0	Organic acids	Organic acids	C6H10O4	145.05	101.06	146.058	[M-H]-	3	617-62-9	-	390006	377936	418243	380765	388454	417478	435406	485293	369660	461463	527453	691532	425420	553412	517223	317774	293346	297190	-	-	-
mws0574	2-Hydroxy-2-methylpropanoate	0	Organic acids	Organic acids	C4H8O3	103.04	57.04	104.047	[M-H]-	3	594-61-6	C21297	41370.5	41582.2	44255.5	37570.5	40928	41017.8	27945.8	23167.9	41149.1	23412.2	32368.1	17778.3	26912.3	30575.4	40740.9	36635.1	32498.5	31180.4	-	C21297	-
mws0609	3',5'-Cyclic GMP	0	Nucleotides and derivatives	Nucleotides and derivatives	C10H12N5O7P	344.04	150.04	345.047	[M-H]-	1	7665-99-8	C00942	110341	100555	99601.9	99530.4	105655	111457	74994.5	83000.9	86439.6	68029.9	61140.8	49378.5	96001.5	94763.8	86596.2	96222	92798.6	89298.3	ko00230,ko01100,ko04075	C00942	-
Lmqn000780	UDP-N-acetyl-alpha-D-glucosamine	0	Nucleotides and derivatives	Nucleotides and derivatives	C17H27N3O17P2	606.08	384.98	607.082	[M-H]-	2	528-04-1	C00043	204928	204762	199835	180964	190695	215528	172267	153394	187463	104407	164299	99948.8	107695	133202	198016	162038	177346	135393	ko00520,ko01100,ko01250	C00043	-
mws1629	Aucubin	0	Terpenoids	Sesquiterpenoids	C15H22O9	345.12	183.07	346.126	[M-H]-	2	479-98-1	C09771	33667.7	37531.4	29388.8	41803.4	57810.4	30772.7	44597.3	48615.6	42383.1	66642.8	63549.7	70661.4	75333.8	47539.5	56188.9	54792.2	51819.2	65111.8	-	C09771	-
Saln004708	1-O-Glucopyranosylamplexine*	0	Terpenoids	Monoterpenoids	C16H26O9	361.15	199.1	362.158	[M-H]-	2	-	-	25903.9	45385.4	38827.9	36251	32775.5	47896.2	110979	93519.7	133284	191576	295986	190643	116829	194613	134417	120095	80129.8	141602	-	-	-
Lcfn051998	2-[3,5-dihydroxy-2-[4-[4-[(4-hydroxy-3-methoxyphenyl)methyl]-3-(hydroxymethyl)oxolan-2-yl]-2-methoxyphenoxy]-6-(hydroxymethyl)oxan-4-yl]oxy-6-(hydroxymethyl)oxane-3,4,5-triol*	0	Lignans and Coumarins	Lignans	C32H44O16	683.26	329.14	684.263	[M-H]-	2	-	-	379867	372702	256289	313795	350789	357758	368017	467156	395778	419590	451597	569102	421957	379279	398012	369198	337522	494504	-	-	-
Lcsn000192	indigoticoside A*	0	Lignans and Coumarins	Lignans	C32H44O16	683.26	329.14	684.263	[M-H]-	2	-	-	493897	508766	435836	412974	478594	486720	480850	558401	479575	582965	593867	630807	618785	500369	460613	595908	451066	597294	-	-	-
Sasn001174	Hymenoside M	0	Others	Others	C11H20O8	339.13	117.06	280.116	[M+CH3COOH-H]-	2	-	-	172352	197828	191804	175919	179133	182085	209269	222249	199596	256536	285059	282670	256088	276706	235078	207401	194153	227809	-	-	-
mws0884	3',5'-Cyclic AMP	0	Nucleotides and derivatives	Nucleotides and derivatives	C10H12N5O6P	328.05	134.05	329.053	[M-H]-	1	60-92-4	C00575	433876	462351	357048	419309	360590	390519	297151	356804	369975	211139	199858	223830	301405	311803	269411	373534	319801	328679	ko00230,ko01100	C00575	-
mws1574	Geniposidic acid	0	Terpenoids	Monoterpenoids	C16H22O10	373.11	123.01	374.121	[M-H]-	1	27741-01-1	C11673	53584.8	49622	37654.9	48260.6	36052.6	46290	56019.8	45862.8	50182.3	133869	95447.8	122111	90732.1	103376	91542.7	79169.9	85296.8	63093.6	ko00902,ko01110	C11673	-
Lmbn002737	3-Methylbenzaldehyde	0	Others	Aldehyde compounds	C8H8O	119.05	93.03	120.058	[M-H]-	3	620-23-5	C07209	34102.9	37830.2	35548.8	53712.3	46427.7	64262.1	44255.9	68186.2	52956.3	99563	87939.5	87117.5	61835.2	41827.2	71003.7	53120.4	64085.6	51161.3	ko01100	C07209	-
Safn006331	9-(2,3-dihydroxypropoxy)-9-oxononanoic acid	0	Lipids	Free fatty acids	C12H22O6	261.13	125.1	262.142	[M-H]-	3	109421-77-4	-	18434.4	19700.8	24912.1	22821.3	23463.1	16986.7	17731.7	12707.5	23189.8	38584.9	25218.6	26312.3	26933.3	30263.2	18649.7	20801.1	24155.2	23841.8	-	-	-
Lmmn000774	Dihydrocaffeoylglucose*	0	Phenolic acids	Phenolic acids	C15H20O9	343.1	181.05	344.111	[M-H]-	1	-	-	671579	741256	705688	809517	831415	877110	938486	889273	1.01741e+06	1.18007e+06	1.1576e+06	1.05355e+06	1.09509e+06	1.25225e+06	1.11736e+06	900474	881365	911615	-	CM02657	MetMap166,MetMap168,MetMap169
Safn004633	Ilicifolinoside B	0	Terpenoids	Sesquiterpenoids	C19H32O8	447.23	387.2	388.21	[M+CH3COOH-H]-	2	-	-	28975	47026	54338.6	37908.2	36532.2	42167.9	46655.3	40235.6	46963.7	67854.7	73385	71491.2	64814.1	62815.5	56830	57034.9	52643	52869.9	-	-	-
pmf0314	cis-Abienol	0	Terpenoids	Ditepenoids	C20H34O	289.25	157.16	290.261	[M-H]-	3	17990-16-8	C20481	20292.5	19975.3	21083.9	19830.1	20038.6	20916	18818.1	20413.2	17424.6	16255.9	15158.6	13581.5	15942	16287	17516.8	16499.2	14499.5	21133	ko00904,ko01110	C20481	-
pmn001400	2,3,5,4'-Tetrahydroxystilbene-2-O-xyloside	0	Others	Stilbene	C19H20O8	375.11	243.1	376.116	[M-H]-	3	-	-	13118.5	33207.4	18820.9	19418.9	20617.4	20850.1	18882.2	17399	31485	11609.9	17031.5	10790.9	25236.6	8339.09	20211.3	19109.8	27893.1	23168.2	-	CM02303	MetMap152
MWStz488	4-p-Coumaroylquinic acid	0	Phenolic acids	Phenolic acids	C16H18O8	337.09	173.05	338.1	[M-H]-	3	93451-44-6	C10441	7831.08	9853.92	4542.31	10616.9	7194.56	12844.3	12553.5	9795.34	5683.22	15851	16570.1	14077.8	10210.6	9117.6	16310	7955.8	15248.7	13975.6	-	C10441	-
Lmzn001582	5'-Glucosyloxyjasmonic acid*	0	Organic acids	Organic acids	C18H28O9	387.17	207.1	388.173	[M-H]-	1	-	-	58194.4	69522.7	65054.8	36757.7	53841.7	39802.9	46396.7	49221	40189.7	4118.63	4118.63	4118.63	24690.7	22011.2	20593.1	47600	39003.7	47929.3	-	-	-

## Sheet: Blue
nodeName	Compounds	degree	ClassⅠ	ClassⅡ	Formula	Q1 (Da)	Q3 (Da)	Molecular weight (Da)	Ionization model	Level	CAS	cpd_ID	120DAI_1	120DAI_2	120DAI_3	180DAI_1	180DAI_2	180DAI_3	240DAI_1	240DAI_2	240DAI_3	300DAI_1	300DAI_2	300DAI_3	360DAI_1	360DAI_2	360DAI_3	QC01	QC02	QC03	kegg_map	mw_cpd_ID	mw_map
WapTKC008879	19-Norandrographolide C	14	Terpenoids	Ditepenoids	C19H24O3	301.18	255.21	300.173	[M+H]+	2	932014-90-9	-	336691	333484	318361	15024.5	32526.1	19660.5	3004.89	3004.89	3004.89	121661	124787	108672	3004.89	3004.89	3004.89	119527	125722	128124	-	-	-
MWStz562	7-Oxodehydroabietic acid*	10	Terpenoids	Ditepenoids	C20H26O3	315.2	187.12	314.188	[M+H]+	1	18684-55-4	-	4.47851e+07	4.33175e+07	3.97017e+07	2.0157e+06	2.23317e+06	2.08014e+06	1.97749e+06	1.8842e+06	1.8921e+06	1.89379e+07	2.24438e+07	1.93978e+07	1.92139e+06	2.10102e+06	1.97336e+06	1.6973e+07	1.55738e+07	1.61262e+07	-	-	-
Wbmp010013	Polyalthic acid	10	Terpenoids	Ditepenoids	C20H28O3	317.21	253.2	316.204	[M+H]+	2	1235-76-3	-	394791	351359	325158	23281.1	23281.1	23281.1	23281.1	23281.1	23281.1	141900	175445	163477	23281.1	23281.1	23281.1	116406	129253	125329	-	-	-
Walbn06605	2,3-bis(2-carboxyphenyl)succinic acid	10	Phenolic acids	Phenolic acids	C18H14O8	357.06	121.03	358.069	[M-H]-	3	-	-	8.01184e+06	7.11614e+06	3.16626e+07	7.92523e+06	8.18869e+06	1.03698e+07	6.26027e+06	4.55237e+06	4.67311e+06	1.14598e+07	1.56166e+07	6.17084e+06	5.67982e+06	6.24818e+06	7.66124e+06	3.25277e+06	3.27698e+06	3.40428e+06	-	-	-
Qatp009455	Cyclocolorenone*	9	Terpenoids	Sesquiterpenoids	C15H22O	219.17	119.08	218.167	[M+H]+	1	489-45-2	-	245962	165052	699012	195653	188987	235455	183493	156697	130029	288629	402981	172289	176021	199648	276080	103822	116707	97414.6	-	-	-
Wadp010342	7-Oxodehydropimaric acid	9	Terpenoids	Ditepenoids	C20H26O3	315.19	147.08	314.188	[M+H]+	2	-	-	2.20352e+06	2.04813e+06	1.97353e+06	98990.1	94296.9	104078	84752.8	108776	88615.8	1.00745e+06	1.16634e+06	1.03724e+06	98992.3	101766	94999.4	899003	841280	876283	-	-	-
WapTKC006987	Gibberellin A12	9	Terpenoids	Ditepenoids	C20H28O4	333.2	287.2	332.199	[M+H]+	2	1164-45-0	C11857	35977.3	45654.7	41247.7	848.945	848.945	848.945	848.945	848.945	848.945	20319.3	25592	34998.8	8845.51	4244.72	8470.72	24077.1	23167.6	24151.4	ko00904,ko01100,ko01110	C11857	-
Rfn09756	(4aS,6R,8aR)-8a-methyl-4-methylidene-6-(prop-1-en-2-yl)-decahydronaphthalen-1-one*	8	Terpenoids	Sesquiterpenoids	C15H22O	219.17	119.08	218.167	[M+H]+	1	-	-	224444	191764	713046	197690	146183	258049	133785	144223	100658	260830	344091	105824	106692	134880	184697	88882.2	75999.5	77635.5	-	-	-
Sayp010368	phyllanflexoid A*	8	Terpenoids	Ditepenoids	C20H26O3	315.19	187.11	314.188	[M+H]+	1	-	-	4.35648e+07	4.17063e+07	3.71117e+07	2.1391e+06	2.09797e+06	2.0998e+06	2.02244e+06	1.74698e+06	2.01864e+06	2.00135e+07	2.33361e+07	2.02667e+07	1.85216e+06	1.97979e+06	1.79959e+06	1.70908e+07	1.5483e+07	1.57523e+07	-	-	-
PDP064500	(1S,5R,7S,8aS)-1-methyl-4-methylidene-7-prop-1-en-2-yl-2,5,6,7,8,8a-hexahydro-1H-azulen-5-ol*	8	Terpenoids	Sesquiterpenoids	C15H22O	219.17	119.09	218.167	[M+H]+	1	-	-	222692	179030	674373	178699	213081	201005	155826	159031	117401	334096	405665	179029	186869	211486	243824	108303	87310.7	105740	-	-	-
WapTKC039086	Africanone*	8	Terpenoids	Sesquiterpenoids	C15H22O	219.17	119.08	218.167	[M+H]+	1	90851-05-1	-	394364	330082	1.02896e+06	399137	412119	469025	390320	331282	276283	510350	621147	465103	389762	386446	500057	261238	250328	268272	-	-	-
PD0637677	Angustanoic acid E	8	Terpenoids	Ditepenoids	C20H26O2	299.2	253.19	298.193	[M+H]+	1	-	-	1.64781e+06	1.42535e+06	1.4739e+06	29551.8	16320.4	31969.1	38527.5	39740.8	39765.7	762654	1.13742e+06	721074	30884.5	44414.4	27260.5	589774	565540	578911	-	-	-
PDP159316	17a-Hydroxymethyl-17b-methyl-18-norandrosta-1,4,13-trien-3-one	8	Terpenoids	Ditepenoids	C20H26O2	299.2	173.13	298.193	[M+H]+	2	1203575-20-5	-	129660	122449	109754	9708.53	9708.53	9708.53	9708.53	9708.53	9708.53	68425.8	74560.8	63564.9	9708.53	9708.53	9708.53	48542.6	54832.8	60415.5	-	-	-
Sayp011213	cleistanthol*	7	Terpenoids	Ditepenoids	C20H28O3	317.21	271.21	316.204	[M+H]+	1	24465-21-2	-	535635	452179	484606	28617.6	22607.1	27498.3	32204	29211.7	28411.1	259852	269935	291617	26857.4	28865.7	27758.7	209295	200002	177680	-	-	-
Sasp011022	7-ethenyl-1,4a,7-trimethyl-6-oxo-1,2,3,4,4a,6,7,8,8a,9,10,10a-dodecahydrophenanthrene-1-carboxylic acid*	7	Terpenoids	Ditepenoids	C20H28O3	317.21	271.21	316.204	[M+H]+	1	-	-	498718	466179	446997	43323.6	23315.8	29290.3	31591	21856.4	20076.3	250568	259408	259279	21626.2	16876.7	25346.6	155952	179863	172524	-	-	-
WapTKC136893	7(14),9-Chamigradien-2-one*	6	Terpenoids	Sesquiterpenoids	C15H22O	219.17	119.08	218.167	[M+H]+	1	-	-	489461	428662	1.08073e+06	444962	420013	505981	526955	398140	344729	573176	731733	506423	459312	417845	565107	325114	281680	280474	-	-	-
WapTKC034258	11-Hydroxy-4(15)-Eudesmen-3-One	6	Terpenoids	Sesquiterpenoids	C15H24O2	237.19	121.1	236.178	[M+H]+	3	113689-46-6	-	90528.3	53643.3	167235	50889.5	66227	78901.7	60412	45465.4	54783.8	88439.7	132960	67949.2	61152.4	65693.2	74703.8	42054.2	26392.8	33597.7	-	-	-
Hmgn001653	3,4-Dihydroxybenzaldehyde	6	Others	Aldehyde compounds	C7H6O3	137.02	93.04	138.032	[M-H]-	1	139-85-5	C16700	791291	741866	1.71413e+06	778921	764105	806734	669853	749838	680978	828733	875407	632461	807206	842094	854662	641356	651635	653041	ko00950	C16700	-
Zaxn005652	Pisiferic acid	6	Terpenoids	Ditepenoids	C20H28O3	315.2	315.2	316.204	[M-H]-	3	67494-15-9	C09163	1.89805e+06	1.91887e+06	1.77687e+06	31303.7	19421	26444.3	26411.6	29472	18632.5	1.13738e+06	1.45441e+06	1.23429e+06	33118.9	33538	24452.9	771147	807939	680639	ko00904,ko01110	C09163	-
WapTKC012502	7-Oxo-8,11,13-Cleistanthatrien-19-Oic Acid	4	Terpenoids	Ditepenoids	C20H26O3	315.19	269.19	314.188	[M+H]+	2	163891-99-4	-	2.12134e+06	1.72812e+06	1.69263e+06	91173.9	108346	80452.9	65709.6	84351.6	80848.2	788153	996745	819856	48560.4	82761.9	80715.3	703083	648330	616106	-	-	-
Lafp007563	Costal	4	Terpenoids	Sesquiterpenoids	C15H22O	219.17	121.1	218.167	[M+H]+	3	-	-	35422	51603.2	140906	48049.7	43183.6	66771.9	57022.2	36396.3	33590.7	76263.4	93281.2	44989.7	52147.2	95481.2	66714.2	51517.7	31851.7	37743	-	-	-
WapTKC076048	(1R,4R,5S,9S,13R)-5,9-Dimethyl-14-Methylidenetetracyclo[11.2.1.01,10.04,9]Hexadec-10-Ene-5-Carboxylic Acid*	4	Terpenoids	Ditepenoids	C20H28O2	301.21	255.21	300.209	[M+H]+	1	-	-	121702	123146	115514	7307.45	7307.45	7307.45	7307.45	7307.45	7307.45	43244.7	78057.1	62543.6	7307.45	7307.45	7307.45	36537.3	47766.1	57901.5	-	-	-
mws0749	4-Hydroxybenzoate	4	Phenolic acids	Phenolic acids	C7H6O3	137.02	93.03	138.032	[M-H]-	1	99-96-7	C00156	768150	709449	2.08783e+06	719471	645961	899964	569680	803500	655415	836249	919418	753277	588239	627981	673053	581458	490085	581993	ko00130,ko00790,ko01100,ko01110,ko01240	C00156	MetMap157,MetMap163,MetMap164
Wdhp006324	3-(4-hydroxyphenyl)-n-[2-(4-hydroxyphenyl)ethyl]prop-2-enimidic acid	3	Alkaloids	Isoquinoline alkaloids	C17H17NO3	284.13	121.07	283.121	[M+H]+	1	-	-	1.43102e+06	1.36606e+06	1.25246e+06	479099	523402	450690	302411	309516	361512	326760	332231	324848	138801	185005	109942	676992	532966	552843	-	-	-
mws1489	Octadecanoic acid	3	Lipids	Free fatty acids	C18H36O2	283.26	283.26	284.272	[M-H]-	2	57-11-4	C01530	1.07103e+08	1.22803e+08	1.46334e+08	1.49515e+08	1.42307e+08	1.56631e+08	1.34928e+08	1.95938e+08	2.07826e+08	2.21829e+08	1.42191e+08	1.2327e+08	1.44479e+08	1.59554e+08	1.69241e+08	1.29604e+08	1.89872e+08	1.81608e+08	ko00061,ko01040,ko01100	C01530	-
Zaxn007230	Isopimaradieneone*	3	Terpenoids	Ditepenoids	C20H30O	285.22	285.22	286.23	[M-H]-	3	-	-	958403	1.13031e+06	1.29788e+06	1.34862e+06	1.29967e+06	1.35901e+06	1.14156e+06	1.77918e+06	1.86129e+06	2.00345e+06	1.21152e+06	1.10349e+06	1.2721e+06	1.32716e+06	1.39917e+06	1.03322e+06	1.69298e+06	1.5585e+06	-	-	-
mws4017	Ferruginol*	3	Terpenoids	Ditepenoids	C20H30O	285.22	285.22	286.23	[M-H]-	3	514-62-5	C09092	922769	1.08936e+06	1.24725e+06	1.30304e+06	1.25616e+06	1.37215e+06	1.12907e+06	1.73055e+06	1.80689e+06	1.90349e+06	1.19928e+06	1.0463e+06	1.1917e+06	1.31648e+06	1.41752e+06	1.03473e+06	1.66885e+06	1.57186e+06	ko00904,ko01110	C09092	-
Zmyn005026	Isooctadecanoic acid	3	Lipids	Free fatty acids	C18H36O2	283.26	283.26	284.272	[M-H]-	2	2724-58-5	C20356	3.64026e+07	4.15331e+07	4.89336e+07	5.0751e+07	4.79438e+07	5.21652e+07	4.49863e+07	6.59543e+07	6.92285e+07	7.35569e+07	4.63691e+07	3.98425e+07	4.69647e+07	5.27177e+07	5.53983e+07	4.0727e+07	6.48939e+07	5.94212e+07	-	C20356	-
Sayp009177	vouacapenic acid	2	Terpenoids	Ditepenoids	C20H28O3	317.21	253.19	316.204	[M+H]+	2	-	-	1.42173e+06	1.44376e+06	1.20975e+06	94625.2	94625.2	94625.2	94625.2	94625.2	94625.2	896050	1.21367e+06	946500	94625.2	94625.2	94625.2	474987	473126	553669	-	-	-
Lmhp008885	LysoPE 15:0(2n isomer)*	1	Lipids	LPE	C20H42NO7P	440.28	299.26	439.27	[M+H]+	2	-	-	1.2075e+06	1.10096e+06	954418	455594	501953	466924	430811	483402	415946	511179	481554	527290	375001	393587	395854	741795	668660	691439	-	-	-
Lmhp009187	LysoPE 15:0*	1	Lipids	LPE	C20H42NO7P	440.28	299.26	439.27	[M+H]+	2	-	-	1.21472e+06	1.1262e+06	973305	446780	474151	421902	406387	483336	379878	484037	473507	438750	396403	438338	377997	684127	672584	741678	-	-	-
Wdjp008859	1-(7-Hydroxy-5-methoxyphenanthren-2-yl)oxy-4-methoxyphenanthrene-2,7-diol	1	Others	Others	C30H22O6	479.15	239.07	478.142	[M+H]+	1	-	-	1.11358e+06	1.46291e+06	1.3766e+06	231736	341512	472113	210632	219106	269633	580133	973472	647678	380174	334780	318161	722721	753503	741860	-	-	-
PDP060499	Phosphatidylcholine lyso 15:0*	1	Lipids	LPC	C23H48NO7P	482.33	184.07	481.317	[M+H]+	1	17364-10-2	-	2.02402e+06	1.92522e+06	1.5279e+06	886687	949946	994156	871492	1.05869e+06	758009	841118	866705	899141	746501	797517	700155	1.14962e+06	1.11985e+06	1.17605e+06	-	-	-
MWS2984	8-Azaguanine	1	Nucleotides and derivatives	Nucleotides and derivatives	C4H4N6O	153.05	136.03	152.045	[M+H]+	3	134-58-7	-	144763	86651.6	118491	22278.4	25264.2	23026.9	27479.1	21014.2	27992.3	65260.4	88574.3	55991.9	55955.6	51049.1	42140.3	63459.1	54398.2	39114	-	-	-
Lmjp101407	5-Geranyloxy-7-Hydroxycoumarin	1	Lignans and Coumarins	Coumarins	C19H22O4	315.16	187.04	314.152	[M+H]+	3	-	-	1.83382e+06	1.78335e+06	1.39684e+06	116903	116903	116903	116903	116903	116903	770220	867743	823785	116903	116903	116903	584514	589774	647097	-	-	-
WapTKC007934	Majusanic Acid F	1	Terpenoids	Ditepenoids	C20H28O3	317.21	271.2	316.204	[M+H]+	3	1459730-89-2	-	70377.5	72970.4	114056	5608.45	5608.45	5608.45	5608.45	5608.45	5608.45	43139.7	88178.7	72491.2	5608.45	5608.45	5608.45	52190.3	28042.3	63256.9	-	-	-
Lmjp101201	murralongin	1	Lignans and Coumarins	Coumarins	C15H14O4	259.1	189.05	258.089	[M+H]+	1	53011-72-6	-	3590.69	3590.69	22241.2	3590.69	3590.69	3590.69	3590.69	3590.69	3590.69	3590.69	3590.69	3590.69	3590.69	3590.69	3590.69	23839	17953.4	20117.5	-	-	-
Lmmn001294	Koaburaside	1	Others	Others	C14H20O9	331.1	153.02	332.111	[M-H]-	1	41653-73-0	-	1.19577e+06	1.30188e+06	1.22843e+06	651063	626766	717814	698587	667105	630783	848334	867906	969131	836575	771083	704270	958107	904911	860359	-	-	-
Zbqn006727	Quinizarin; 1,4-Dihydroxyanthraquinone*	1	Quinones	Anthraquinone	C14H8O4	239.03	211.04	240.042	[M-H]-	1	81-64-1	-	203579	220507	236039	46881.5	72673.5	68249.9	29920.3	37145.8	53082.5	121305	122627	107190	57398.7	76688.4	53300.1	139090	149143	146636	-	-	-
WapTKC209208	Liangwanoside C	0	Terpenoids	Sesquiterpenoids	C19H34O8	391.23	211.17	390.225	[M+H]+	3	-	-	803218	657560	559796	526881	671307	436710	326013	415376	331529	505222	612291	572713	436310	619549	327450	390677	595338	361316	-	-	-
Rlp00117	12,13-Dehydrogeranylgeraniol	0	Terpenoids	Monoterpenoids	C18H30O	263.24	67.05	262.23	[M+H]+	1	352274-18-1	-	691970	704252	598769	428144	480058	478309	227671	322108	299349	311135	320104	282601	327720	458448	379809	550390	523271	517421	-	-	-
pmd0160	LysoPE 16:0(2n isomer)*	0	Lipids	LPE	C21H44NO7P	454.29	313.27	453.286	[M+H]+	1	-	-	2.31857e+07	2.2503e+07	1.85396e+07	1.12286e+07	1.11916e+07	1.10376e+07	1.17508e+07	1.3379e+07	1.08113e+07	1.3387e+07	1.3426e+07	1.3774e+07	8.00623e+06	9.27269e+06	8.02134e+06	1.74987e+07	1.5075e+07	1.5345e+07	-	-	-
Wbmp003419	Dihydrovomifoliol-O-β-D-glucoside	0	Terpenoids	Sesquiterpenoids	C19H32O8	389.22	209.15	388.21	[M+H]+	3	-	-	178191	183974	149616	144611	90133.9	43747.2	75093.5	104327	121859	180311	185793	96656.3	46865.9	52083.3	38044.8	72549.1	142643	118893	-	-	-
pmd0147	LysoPC 20:2*	0	Lipids	LPC	C28H54NO7P	548.37	184.07	547.364	[M+H]+	3	-	-	187756	150673	172414	89510.5	120197	112047	103635	153088	123176	85550.6	134837	134861	60804.8	69779.6	99945.6	129888	125630	106379	-	-	-
Zmlp003063	Luteolin 7-rutinoside-4'-O-Rhamnoside*	0	Flavonoids	Flavones	C33H40O19	741.23	433.12	740.216	[M+H]+	3	-	-	130631	126114	115191	73394.6	41373.8	50766.3	60784.4	58178	54949.3	75006.9	83361.1	103561	77770.7	83379.5	103164	85321.1	64861.5	118863	-	-	-
Zbkp003773	Tuliposide B	0	Organic acids	Organic acids	C11H18O9	295.1	115.04	294.095	[M+H]+	1	19870-33-8	C08570	128393	159233	132488	78235.1	84782.6	129981	107177	127179	147255	116754	129762	110462	103085	122625	156677	184991	129583	98901.3	-	C08570	-
Rlp07143	4,2'-Dihydroxychalcone 4-glucoside	0	Flavonoids	Chalcones	C21H22O8	403.14	241.09	402.132	[M+H]+	3	-	-	1.93718e+06	1.77941e+06	1.6825e+06	606209	648565	632601	216613	220453	218099	328142	320268	379241	38340.7	27391.7	40142.9	573108	655978	577382	-	-	-
MWS2032	6-Methylnicotinamide	0	Alkaloids	Pyridine alkaloids	C7H8N2O	137.07	65.04	136.064	[M+H]+	3	6960-22-1	-	581363	734150	623249	498862	441575	484205	459372	439262	416904	597748	603850	633748	304671	319678	261333	452827	640112	529341	-	-	-
pme1194	Deoxycytidine	0	Nucleotides and derivatives	Nucleotides and derivatives	C9H13N3O4	228.1	112.05	227.091	[M+H]+	3	951-77-9	C00881	189300	149784	145088	99008.8	92555	106234	93961.9	76371.1	73587.4	38209.2	47223.8	85596.5	107152	83023.6	89705.1	67899.8	114118	92320.3	ko00240,ko01100,ko01232,ko02010	C00881	-
Rlp02935	(3Z,9Z)-7-{[3,4,5-trihydroxy-6-(hydroxymethyl)oxan-2-yl]oxy}-1-oxacyclododeca-3,9-dien-2-one	0	Others	Lactones	C17H26O8	359.17	197.12	358.163	[M+H]+	1	-	-	370167	371553	340435	807022	1.13952e+06	950472	954602	1.10211e+06	962231	1.10666e+06	940427	1.07389e+06	1.02993e+06	1.27331e+06	1.13166e+06	913090	797800	939193	-	-	-
Sadp005928	Staphylin*	0	Others	Chromone	C16H18O9	355.1	193.05	354.095	[M+H]+	3	58108-99-9	-	94911.5	102598	97122.1	140600	471667	537217	211650	144856	173992	278175	213324	296955	189089	358478	299264	232608	113158	240850	-	-	-
NK10246260	4-Hydroxy-2-quinolone	0	Alkaloids	Quinoline alkaloids	C9H7NO2	162.06	116.05	161.048	[M+H]+	3	86-95-3	C16716	430219	408045	303700	176427	75091.8	104582	160664	220513	142588	121482	107473	106105	205492	71990.2	96179.7	159928	194758	137149	-	C16716	-
Wcop004851	5,6-dimethyl-2-benzofuran-1,3-dione	0	Terpenoids	Sesquiterpenoids	C10H8O3	177.05	117.03	176.047	[M+H]+	3	5999-20-2	-	6.09478e+06	5.51903e+06	4.97745e+06	7.18898e+06	1.25853e+07	7.22519e+06	8.2825e+06	8.66142e+06	8.51709e+06	9.02349e+06	8.79878e+06	9.38289e+06	1.31546e+07	1.11954e+07	1.17569e+07	7.1187e+06	9.25818e+06	1.03193e+07	-	-	-
WapTKC021287	P-Menth-1-En-8-ol O-β-D-Glucopyranoside	0	Terpenoids	Monoterpenoids	C16H28O6	317.2	137.13	316.189	[M+H]+	3	114673-99-3	-	348625	411866	404972	657596	1.08265e+06	1.12262e+06	1.2264e+06	1.1335e+06	1.15773e+06	1.31988e+06	1.29237e+06	1.40283e+06	1.26669e+06	1.329e+06	1.25296e+06	1.02091e+06	770842	1.12388e+06	-	-	-
MWStz411	(-)-Isolariciresinol 9'-O-glucoside	0	Lignans and Coumarins	Lignans	C26H34O11	523.22	219.1	522.21	[M+H]+	2	143236-04-8	-	67905.7	65590.9	49073.2	91624.1	200980	87990	103842	165406	67346.5	91872.3	92149.4	140025	137194	102788	103339	122310	92598.2	118753	-	-	-
Wbtp003131	Irisxanthone	0	Flavonoids	Other Flavonoids	C20H20O11	437.11	275.06	436.101	[M+H]+	2	51419-56-8	C10067	203635	217426	378099	327213	220145	347614	284188	410065	408520	366668	273409	328206	311557	276760	384175	321941	399200	296806	-	C10067	-
mws3133	N-Acetyl-L-hydroxyproline	0	Amino acids and derivatives	Amino acids and derivatives	C7H11NO4	174.08	86.06	173.069	[M+H]+	3	33996-33-7	-	225322	174252	236081	118570	172240	145770	211915	145920	143345	121457	149523	185095	117373	126160	99960.6	137425	171961	131075	-	-	-
mws0120	sn-Glycero-3-phosphocholine	0	Lipids	PC	C8H20NO6P	258.11	104.11	257.103	[M+H]+	3	28319-77-9	C00670	1.22222e+07	1.27658e+07	1.33938e+07	7.85722e+06	7.59188e+06	7.49181e+06	4.19997e+06	3.75208e+06	4.04951e+06	2.85831e+06	2.92746e+06	2.92552e+06	2.87027e+06	2.67766e+06	3.06335e+06	6.27892e+06	6.39072e+06	6.6264e+06	ko00564,ko00565	C00670	-
PDP212633	3-({4,8-dihydroxy-2,6-dioxabicyclo[3.2.1]octan-3-yl}oxy)-2,4,5,6-tetrahydroxyhexanal	0	Others	Saccharides	C12H20O10	325.11	127.04	324.106	[M+H]+	2	-	-	354167	347550	234797	251720	202815	251744	197828	218252	219937	161320	126585	300115	211249	254707	210529	213689	259432	279542	-	-	-
WapTKC172691	3-Hydroxylabda-8(20),13-Dien-15-Oic Acid	0	Terpenoids	Ditepenoids	C20H32O3	321.24	135.08	320.235	[M+H]+	2	-	-	1.10559e+06	1.11724e+06	1.0198e+06	669384	617770	590798	155210	149687	147977	288878	333903	341644	166298	247286	201455	757346	737078	824284	-	-	-
Rfn010265	Phosphatidylethanolamine lyso 18:2*	0	Lipids	Free fatty acids	C23H44NO7P	478.29	337.28	477.286	[M+H]+	1	-	-	1.6312e+07	1.43325e+07	1.28289e+07	1.17257e+07	1.27549e+07	9.71329e+06	6.56345e+06	6.9747e+06	7.83184e+06	6.59136e+06	7.60979e+06	7.73317e+06	5.7904e+06	6.65228e+06	6.95218e+06	1.12801e+07	1.1825e+07	1.05571e+07	-	-	-
PDP002450	6-Hydroxyluteolin 6,7-dimethyl ether 4'-glucoside*	0	Flavonoids	Flavones	C23H24O12	493.14	331.08	492.127	[M+H]+	3	41087-98-3	-	288920	301304	273630	560335	490759	572208	702610	630366	735963	723193	714202	822100	513226	545394	516752	537215	534288	568317	-	-	-
Rlp02617	pandalizine-D*	0	Alkaloids	Alkaloids	C9H13NO3	184.1	70.06	183.089	[M+H]+	3	-	-	162169	139296	123165	212629	134166	175543	163428	188669	218426	175984	155706	174592	151749	116371	184900	154352	146888	186789	-	-	-
Rlp02821	pandalizine-E*	0	Alkaloids	Alkaloids	C9H13NO3	184.09	70.06	183.089	[M+H]+	3	2102192-71-0	-	137283	133135	128312	212092	122523	145055	151974	180098	192577	214595	111056	188808	167706	110439	156865	181636	176765	197992	-	-	-
WapTKC039726	4(15),10(14)-Aromadendradien-1-ol*	0	Terpenoids	Sesquiterpenoids	C15H22O	219.17	119.08	218.167	[M+H]+	1	782501-65-9	-	149258	171887	157821	226262	203593	191913	195200	218956	156056	203560	198646	188983	225580	251218	232184	177305	210945	172294	-	-	-
WapTKC002297	1,6-Dihydroxy-2,7(19),10,14-Phytatetraen-13-one*	0	Terpenoids	Ditepenoids	C20H32O3	321.24	179.14	320.235	[M+H]+	1	79404-59-4	-	2.51138e+07	2.52808e+07	2.19202e+07	1.3145e+07	1.42874e+07	1.31625e+07	3.62286e+06	3.44006e+06	3.40751e+06	5.45686e+06	6.84973e+06	6.63718e+06	4.38139e+06	5.04343e+06	4.01366e+06	1.90195e+07	1.72897e+07	1.73436e+07	-	-	-
PD0494699	6-hydroxy-8-(7-hydroxy-2-oxochromen-8-yl)-7-[3,4,5-trihydroxy-6-(hydroxymethyl)oxan-2-yl]oxychromen-2-one	0	Lignans and Coumarins	Coumarins	C24H20O12	501.1	441.11	500.096	[M+H]+	2	-	-	77388.2	99869	92694.3	121591	144472	123145	142905	137225	142731	182890	135274	165631	179052	103523	112763	127064	144758	141464	-	-	-
WapTKC023839	9,10-Dinor-3-Oxo-4-Megastigmen-8-Oic Acid*	0	Terpenoids	Monoterpenoids	C11H16O3	197.12	133.1	196.11	[M+H]+	1	81921-21-3	-	369054	320834	272026	429899	497731	487180	516747	537041	599725	531186	443888	445806	498094	479726	367991	443496	489874	439521	-	-	-
Hmgp003086	Tricin-7-O-rutinoside*	0	Flavonoids	Flavones	C29H34O16	639.19	331.08	638.185	[M+H]+	1	-	-	3.68776e+06	3.20089e+06	2.66565e+06	8.26099e+06	7.91966e+06	8.61788e+06	7.48495e+06	7.03184e+06	8.01342e+06	8.93629e+06	9.07776e+06	8.86703e+06	6.793e+06	6.71282e+06	7.77888e+06	6.59749e+06	5.71502e+06	6.30117e+06	-	-	-
Hahp005583	Sesuvioside A*	0	Flavonoids	Isoflavones	C29H34O16	639.19	331.08	638.185	[M+H]+	1	-	-	3.35226e+06	3.25577e+06	2.99389e+06	8.23436e+06	8.5903e+06	7.98764e+06	7.42852e+06	6.81355e+06	7.06318e+06	8.17806e+06	9.06312e+06	7.93721e+06	7.17517e+06	7.44473e+06	7.22783e+06	6.23349e+06	6.16e+06	6.77783e+06	-	-	-
Wacyp05420	3,7,11-trimethyldodeca-3,7-diene-1,10,11-triol 1-O-(beta-D-Xylopyranosyl)-beta-D-glucopyranoside	0	Terpenoids	Sesquiterpenoids	C26H46O12	568.33	221.19	550.299	[M+NH4]+	1	-	-	103430	156885	167121	257364	184442	396195	271048	240665	183499	269089	305384	176308	279637	259085	383338	307092	262359	264018	-	-	-
Wasdp05671	Santalol A	0	Terpenoids	Sesquiterpenoids	C15H24O	221.19	81.07	220.183	[M+H]+	2	-	-	324913	370363	337415	560634	649651	634627	523860	562291	572850	616968	545096	667566	745513	746687	719747	460714	560957	594075	-	-	-
pmp000695	Swertiamarin	0	Terpenoids	Monoterpenoids	C16H22O10	375.13	177.05	374.121	[M+H]+	3	17388-39-5	C09800	149742	210310	84221.6	327275	463392	384909	304778	357273	369759	357540	294458	341575	358405	344153	347535	225076	264318	290047	-	C09800	-
PDP239475	Phosphatidylcholine lyso 18:2*	0	Lipids	LPC	C26H50NO7P	520.34	184.07	519.332	[M+H]+	1	-	-	3.31019e+07	3.37208e+07	2.78597e+07	2.11807e+07	2.13352e+07	1.91458e+07	1.98172e+07	2.59027e+07	1.90186e+07	1.90318e+07	2.14115e+07	2.17771e+07	1.88513e+07	2.10643e+07	1.74195e+07	2.55353e+07	2.43374e+07	2.55184e+07	-	-	-
PD0810965	2,4-dihydroxy-5-[3-(4-hydroxy-3-methoxyphenyl)prop-2-enoyloxy]-3-methoxyhexanedioic acid	0	Phenolic acids	Phenolic acids	C17H20O11	401.11	177.06	400.101	[M+H]+	3	-	-	39049.6	76537.5	88822.5	52985.6	112680	117164	84795.6	88592.8	88296.6	69597.8	49665.5	113630	73905.4	89370.8	133365	150175	72709.4	117581	-	-	-
mws0289	LysoPE 18:1*	0	Lipids	LPE	C23H46NO7P	480.31	339.29	479.301	[M+H]+	2	89576-29-4	-	1.45081e+06	1.18846e+06	949029	786877	745626	685937	1.20906e+06	1.44011e+06	999517	952204	1.10947e+06	1.06791e+06	739253	834747	957951	1.29237e+06	1.2971e+06	1.23063e+06	-	-	-
Hmsp007613	[8]-Gingerdione	0	Phenolic acids	Phenolic acids	C19H28O4	321.2	137.06	320.199	[M+H]+	3	77334-06-6	-	1.29719e+06	1.37251e+06	1.18305e+06	708851	770975	714833	209136	191170	171643	318904	343487	364367	243174	246088	244159	959253	899233	814552	-	-	-
MWS2042	N-Cyclohexylformamide	0	Alkaloids	Alkaloids	C7H13NO	128.11	55.05	127.1	[M+H]+	3	766-93-8	C11519	234299	268704	338009	345889	409819	464956	424278	289863	306940	232837	233586	380266	310590	404553	481841	154030	130620	160721	-	C11519	-
Lmhp112042	1-Linoleoylglycerol*	0	Lipids	Glycerol ester	C21H38O4	355.28	263.24	354.277	[M+H]+	1	2277-28-3	-	292203	316567	280134	195882	173922	157620	101098	101680	85622.3	114748	100496	95779.9	121239	121984	96068.3	194190	218247	192965	-	-	-
Wbsp000408	3β,14α,15α,21α-tetrahydroxyserrat-14-en-21-acetyl-3-(4'-hydroxybenzoate)	0	Terpenoids	Terpene	C39H58O7	639.43	639.43	638.418	[M+H]+	2	-	-	319349	345395	351062	343230	354281	444898	354648	389621	344431	352097	417532	398973	368734	366571	455048	297676	376261	301669	-	-	-
PDP114864	10-Oxo-11,15-phytodienoic acid	0	Others	Others	C18H28O3	293.21	149.1	292.204	[M+H]+	2	-	-	286832	182614	268105	246732	280217	223641	188463	228856	202290	167093	214700	185785	243890	235946	208108	206772	205570	238319	-	-	-
PDP163123	5-hydroxy-2-[[3,4,5-trihydroxy-6-(hydroxymethyl)oxan-2-yl]oxymethyl]pyran-4-one	0	Others	Others	C12H16O9	305.09	143.03	304.079	[M+H]+	1	-	-	1.26933e+06	1.1727e+06	766601	709940	849194	729025	854974	908332	989035	812948	1.03422e+06	966331	731746	716698	629094	756853	929649	812789	-	-	-
Lmhp008801	LysoPE 18:3*	0	Lipids	LPE	C23H42NO7P	476.28	335.26	475.27	[M+H]+	1	-	-	490166	602842	521648	367852	341201	348246	368782	298122	343913	275214	192566	236522	255813	310718	282858	237931	385245	273564	-	-	-
Walbp00988	Pyridoxal Glucoside	0	Alkaloids	Pyridine alkaloids	C14H19NO8	330.12	150.05	329.111	[M+H]+	3	-	-	1.30945e+06	1.44336e+06	1.18141e+06	1.05033e+06	970072	1.03325e+06	798543	794867	719471	1.23155e+06	1.3775e+06	1.60488e+06	1.06614e+06	1.06296e+06	1.13096e+06	985559	1.19833e+06	1.29183e+06	-	-	-
MWSprf168	Equol	0	Flavonoids	Other Flavonoids	C15H14O3	243.1	165.07	242.094	[M+H]+	2	531-95-3	C14131	118370	116231	122394	84004.1	64765.7	128077	76993.6	83424.6	85236.6	73483.4	133772	95719.7	65440.4	58287.4	48457.3	89763.2	98754.4	100929	ko01100	C14131	-
Zadp006809	3β,12-dihydroxy-13-methyl-podocarpane-8,10,13-tiene*	0	Terpenoids	Ditepenoids	C18H26O2	275.2	119.08	274.193	[M+H]+	1	-	-	84660.2	67205.8	45840	103573	94190.5	87296.6	65587.1	71968.1	113363	113253	88230.5	80939	62318.9	125684	67942.8	136659	107639	105508	-	-	-
MWSHY0112	Xanthohumol	0	Flavonoids	Chalcones	C21H22O5	355.15	179.04	354.147	[M+H]+	3	6754-58-1	C16417	1.45439e+06	1.32572e+06	1.27526e+06	860937	919570	822841	311172	323763	251375	344794	597407	462154	408499	325851	356434	1.01267e+06	1.05769e+06	970009	ko00941	C16417	-
PDP001335	4-hydroxy-3-methoxy-pentyl ester benzenepropanoic acid	0	Phenolic acids	Phenolic acids	C15H22O4	267.16	137.06	266.152	[M+H]+	2	-	-	1.80864e+06	1.70752e+06	1.47248e+06	629196	676064	663240	393541	437395	515117	901191	557710	601428	265658	397262	270424	1.94689e+06	1.85825e+06	1.83607e+06	-	-	-
Hmsp005892	[4]-Shogaol	0	Phenolic acids	Phenolic acids	C15H20O3	249.14	137.06	248.141	[M+H]+	1	-	-	2.80285e+06	2.41645e+06	2.3107e+06	1.06826e+06	1.0604e+06	932204	596276	655706	761532	1.26676e+06	846013	872859	374060	595972	372716	2.78054e+06	2.75088e+06	2.59197e+06	-	-	-
PD0590872	1-(4-hydroxy-3-methoxyphenyl)oct-7-en-3-one	0	Others	Others	C15H20O3	249.15	137.06	248.141	[M+H]+	1	748159-46-8	-	2.93607e+06	2.45538e+06	2.61724e+06	1.0799e+06	1.12953e+06	919613	577635	663666	811792	1.27636e+06	1.03612e+06	944236	376233	598029	392138	2.76569e+06	2.98496e+06	2.83297e+06	-	-	-
Lmhp009464	LysoPE 17:1(2n isomer)*	0	Lipids	LPE	C22H44NO7P	466.29	325.27	465.286	[M+H]+	3	-	-	121282	82329.5	87285.8	53578.1	42741.7	70722.3	45760.2	83326.3	59684.9	80810	59451.6	69983.2	27315.7	48826.4	17671.3	91675.2	62689.1	67943.8	-	-	-
Sayp012405	Tomocinol A*	0	Terpenoids	Ditepenoids	C22H36O3	349.27	179.14	348.266	[M+H]+	2	-	-	614287	669675	554835	246687	262385	220627	153151	134081	118353	143581	170870	152712	226773	291054	246451	478492	455613	423464	-	-	-
Zbkp007824	Aflatrem	0	Alkaloids	Alkaloids	C32H39NO4	502.29	459.25	501.288	[M+H]+	2	70553-75-2	C20555	114105	109633	61972.5	33437.7	74157.6	54875.9	88264.1	106409	93285.8	71853.9	107897	80868.3	87564.6	59574	54371.4	92290	99718.6	111191	ko01110	C20555	-
MWSmce013	Hydrocortisone 17-butyrate	0	Others	Others	C25H36O6	433.25	121.06	432.251	[M+H]+	3	13609-67-1	-	419002	551567	437475	481527	395201	518089	378708	366480	365919	390573	344877	374688	363561	303356	470547	370170	430943	381079	-	-	-
pma1751	N-(beta-D-Glucosyl)nicotinate	0	Others	Vitamin	C12H15NO7	286.09	124.04	285.085	[M+H]+	3	-	-	143055	121881	132710	100305	89698.7	112519	64750.3	68453.8	100679	80858	108510	135780	56568.9	52616.2	43868	98524.8	102197	89923.4	-	-	-
PDP077583	2-[(2-aminophenyl)methoxy]-6-(hydroxymethyl)oxane-3,4,5-triol	0	Alkaloids	Alkaloids	C13H19NO6	286.13	106.07	285.121	[M+H]+	2	-	-	350728	334045	307529	165177	248584	214628	180330	176816	163320	215766	318647	278998	93981.3	110497	81354.6	221782	273429	243181	-	-	-
Wbmp008021	(14-Ethyl-4,6,19-trimethoxy-9,11-dioxa-14-azaheptacyclo[10.7.2.12,5.01,13.03,8.08,12.016,20]docosan-21-yl)acetate	0	Alkaloids	Alkaloids	C26H39NO7	478.28	337.27	477.273	[M+H]+	2	-	-	1.81237e+07	1.75781e+07	1.49071e+07	1.09543e+07	1.20857e+07	1.17634e+07	7.47652e+06	8.40754e+06	8.36688e+06	7.25557e+06	7.04659e+06	7.43004e+06	6.71263e+06	8.0398e+06	7.32384e+06	1.10327e+07	1.12416e+07	1.09083e+07	-	-	-
pmb0874	LysoPE 18:2(2n isomer)*	0	Lipids	LPE	C23H44NO7P	478.29	337.27	477.286	[M+H]+	1	-	-	2.72181e+07	2.45503e+07	2.2721e+07	1.815e+07	2.08901e+07	1.74597e+07	1.37418e+07	1.20515e+07	1.23339e+07	1.14597e+07	1.20378e+07	1.2456e+07	1.27928e+07	1.40577e+07	1.33328e+07	1.98367e+07	1.95237e+07	1.88107e+07	-	-	-
Lmgp009434	10α-Hydroperoxy-guaia-1,11-diene*	0	Terpenoids	Sesquiterpenoids	C15H24O2	237.19	121.1	236.178	[M+H]+	1	-	-	793362	763294	750963	1.19069e+06	1.12116e+06	1.07125e+06	1.03927e+06	937209	1.03062e+06	804793	886687	988148	1.24835e+06	1.28373e+06	1.27391e+06	963431	1.03353e+06	1.05522e+06	-	-	-
Lcfp199969	Dehydronerolisovalerate	0	Others	Others	C15H24O2	237.18	135.12	236.178	[M+H]+	3	49831-79-0	-	134994	182184	145459	241000	252827	208803	223413	213568	223105	165214	177706	214537	301681	241224	284848	217183	239399	250604	-	-	-
Lazp008642	1,4-Peroxyaurol-ene*	0	Terpenoids	Sesquiterpenoids	C15H24O2	237.18	121.1	236.177	[M+H]+	1	-	-	685646	684282	634554	1.18547e+06	1.0748e+06	1.07969e+06	1.06684e+06	973622	942962	770042	796406	907559	1.11922e+06	1.2746e+06	1.26302e+06	1.03917e+06	968087	990654	-	-	-
WapTKC120520	(?)-2,9-Humuladien-6-Ol-8-one*	0	Terpenoids	Sesquiterpenoids	C15H24O2	237.19	135.12	236.178	[M+H]+	2	-	-	179309	170674	181338	283635	257097	254478	247923	213633	221848	216513	213380	208463	307007	327456	334712	231857	232421	219223	-	-	-
MWSHY0202	6-Methylflavone	0	Flavonoids	Flavones	C16H12O2	237.09	135.05	236.084	[M+H]+	3	29976-75-8	-	188908	205419	170445	268041	327613	330498	249968	236574	267725	187350	261829	222223	253804	373155	314078	264833	225495	199007	-	-	-
WapTKC038538	Radulol	0	Terpenoids	Sesquiterpenoids	C15H22O	219.17	109.1	218.167	[M+H]+	2	221374-87-4	-	73124.9	71618.3	89469.1	105254	92433.7	112583	95719.4	96581.1	106413	86827.6	78446.3	81220.8	102234	133835	117527	87157.9	83947.7	104882	-	-	-
Lmhp005872	Diferuloylcadaverine	0	Alkaloids	Phenolamine	C25H30N2O6	455.22	177.05	454.21	[M+H]+	3	-	-	97304	80133.6	66033.1	56583.4	45315.6	58989.4	44503.7	34249.3	46215.6	33284.8	40635.5	26268.6	40146.4	32294.6	33923.9	62969.5	58996.6	55992.6	-	-	-
WapTKC167236	4-[3-(4,8-Dimethyl-3,7-Nonadienyl)-3-Methyloxiranyl]-2-Butanone	0	Terpenoids	Ditepenoids	C18H30O2	279.23	81.07	278.225	[M+H]+	1	115028-53-0	-	2.16462e+06	2.08546e+06	1.97514e+06	866678	742602	818291	805548	806101	766179	430944	452794	523778	787051	845800	825689	1.53403e+06	1.47463e+06	1.35719e+06	-	-	-
pme2596	4-Pyridoxate	0	Others	Vitamin	C8H9NO4	184.06	148.04	183.053	[M+H]+	3	82-82-6	C00847	367292	349740	300116	209566	184236	150068	200435	184776	165476	207469	179485	164807	85322.3	131531	118830	214766	203639	194143	ko00750,ko01100	C00847	-
Lmpp003958	Malvidin-3-O-(6''-O-p-coumaroyl)glucoside	0	Flavonoids	Anthocyanidins	C32H31O14+	639.17	331.08	639.171	[M]+	3	158189-28-7	-	3.6001e+06	3.79494e+06	3.31917e+06	6.68422e+06	5.55227e+06	5.75764e+06	7.42389e+06	8.81231e+06	8.58054e+06	9.9205e+06	9.34376e+06	7.93496e+06	3.59418e+06	6.95886e+06	6.66426e+06	7.23654e+06	8.55679e+06	6.7685e+06	-	CM00783	MetMap119
Lmgp004959	Tricin-7-O-neohesperidoside*	0	Flavonoids	Flavones	C29H34O16	639.19	331.08	638.185	[M+H]+	1	53766-40-8	-	3.95302e+06	4.22137e+06	3.2523e+06	6.63365e+06	5.64806e+06	6.8645e+06	7.06895e+06	8.14555e+06	8.19491e+06	9.97303e+06	9.99154e+06	1.03145e+07	4.39581e+06	7.2498e+06	6.79608e+06	7.51451e+06	7.92037e+06	7.3122e+06	-	-	-
PDP002702	Rhamnazin 3-rutinoside*	0	Flavonoids	Flavonols	C29H34O16	639.19	331.08	638.185	[M+H]+	1	64527-08-8	-	4.14427e+06	3.99466e+06	3.17996e+06	7.40474e+06	5.68343e+06	6.46413e+06	8.33884e+06	8.58582e+06	8.32039e+06	9.70401e+06	9.48485e+06	1.06031e+07	4.6402e+06	7.10964e+06	6.68934e+06	6.99438e+06	7.17147e+06	5.94988e+06	-	-	-
Wcdp010162	1-Monolinolenoyl-Rac-Glycerol*	0	Lipids	Glycerol ester	C21H36O4	353.27	261.22	352.261	[M+H]+	1	18465-99-1	-	1.29549e+06	1.37928e+06	986402	495338	523837	434864	448058	405394	364967	480845	442126	438476	706609	701698	742942	944249	959787	842053	-	-	-
Qmxp101615	Ent-3β-Acetoxyisopimar-15-8β-ol*	0	Terpenoids	Ditepenoids	C22H36O3	349.27	179.14	348.266	[M+H]+	2	-	-	661651	662987	602216	273255	260895	247311	139172	131799	117918	114606	133587	145675	274228	291773	295050	425835	463300	496364	-	-	-
Wcsp008252	8α,11-dihydroxypachydictyol A	0	Others	Others	C20H32O3	321.24	151.11	320.235	[M+H]+	2	-	-	376488	365425	353780	203689	228475	185835	62922.2	57673.7	72859.8	82075.7	90480.9	106312	52561.8	62693.6	57741.6	239230	229381	259056	-	-	-
MWSmce461	L-Azetidine 2-carboxylic acid*	0	Alkaloids	Alkaloids	C4H7NO2	102.05	56.05	101.048	[M+H]+	3	2133-34-8	C08267	2.22556e+06	2.17727e+06	2.37307e+06	1.83766e+06	1.9023e+06	1.73017e+06	1.47872e+06	1.52863e+06	1.663e+06	1.23505e+06	1.31857e+06	1.11109e+06	1.74807e+06	1.61463e+06	1.45166e+06	1.62993e+06	1.76624e+06	1.6774e+06	-	C08267	-
PD0619170	4-(1,2,4a,5-tetramethyl-2,3,4,7,8,8a-hexahydronaphthalen-1-yl)butan-2-one	0	Terpenoids	Sesquiterpenoids	C18H30O	263.24	95.09	262.23	[M+H]+	1	-	-	1.12869e+06	1.15143e+06	909242	690558	752198	659695	469283	465211	430939	474776	366608	501792	451511	580628	529041	918038	914669	818582	-	-	-
Zjyp110109	oxyphyllone F	0	Terpenoids	Sesquiterpenoids	C11H16O2	181.12	121.1	180.115	[M+H]+	2	-	-	321289	343813	253428	362846	319157	314610	375455	453738	391781	406469	397709	366585	295245	419682	353733	384422	339623	314190	-	-	-
Walbp10476	trans-11-Icosenamide	0	Lipids	Free fatty acids	C20H39NO	310.31	69.07	309.303	[M+H]+	1	-	-	357672	801029	312698	471023	620650	530705	776068	731912	787750	1.77802e+06	533366	491969	989731	434855	926339	524957	397216	494789	-	-	-
Wcdp010708	Octadeca-2,9,12,15-tetraen-1-ol	0	Others	Others	C18H30O	263.24	81.07	262.23	[M+H]+	1	-	-	964301	1.07561e+06	801195	609014	677658	666899	344350	446252	502293	458048	489318	413332	498524	507113	465077	722833	813103	953658	-	-	-
WapTKC028880	7-Hydroxy-3,7-Dimethyl-2,8-Nonadien-1,4-olide*	0	Terpenoids	Monoterpenoids	C11H16O3	197.12	133.1	196.11	[M+H]+	1	193816-74-9	-	249414	210811	219133	486900	391487	503375	593673	449842	436486	363270	295588	291187	296148	391004	352307	400729	398381	426333	-	-	-
pmp001235	Cnidilide*	0	Others	Lactones	C12H18O2	195.14	79.05	194.131	[M+H]+	2	-	C16937	128465	113532	98698.5	77800.2	89742.7	88362.7	73351.1	93563.7	79369.1	103478	98518.7	126461	84216.4	86627.3	72659.5	113247	111766	106561	-	C16937	-
Wasdp10471	4-Pentylbenzene-1,2-diol	0	Others	Others	C11H16O2	181.12	135.12	180.115	[M+H]+	1	2525-11-3	-	879264	818209	554268	696172	594634	544396	554962	490919	537936	591084	679909	589244	402104	562759	378123	720298	674119	825923	-	-	-
Wacyp09666	6-Hydroxy-3,9-Undecadienoic acid Methyl Ester	0	Lipids	Free fatty acids	C12H20O3	213.15	111.04	212.141	[M+H]+	1	-	-	1.24878e+07	1.06249e+07	7.76066e+06	7.82032e+06	7.19205e+06	6.94099e+06	5.87108e+06	6.37173e+06	5.46814e+06	6.62957e+06	6.60782e+06	6.41057e+06	3.37697e+06	4.20548e+06	3.35726e+06	6.76561e+06	8.59437e+06	7.26876e+06	-	-	-
PD0702877	Menthadienyl acetate	0	Terpenoids	Monoterpenoids	C12H18O2	195.14	93.07	194.131	[M+H]+	2	71660-03-2	-	417048	386583	279990	223134	228223	221896	181014	163798	192027	212646	201848	191962	114886	123531	70487.5	245397	273404	201389	-	-	-
PDP027879	6-ethyl-3-(2-methylpropyl)pyran-2-one	0	Lignans and Coumarins	Coumarins	C11H16O2	181.12	125.06	180.115	[M+H]+	2	-	-	1.38528e+06	1.64809e+06	1.11822e+06	1.13527e+06	1.02211e+06	1.05745e+06	933206	972688	773297	1.06461e+06	1.12582e+06	1.10058e+06	627320	752573	514458	1.47374e+06	1.28436e+06	1.34204e+06	-	-	-
MWS2076	2-Aminophenol	0	Alkaloids	Alkaloids	C6H7NO	110.06	65.04	109.053	[M+H]+	3	95-55-6	C01987	360319	346787	240008	106790	174674	126999	189504	142423	131128	222712	183064	195205	182811	150732	142345	167700	248339	160508	ko00380,ko01100	C01987	-
Zbsp011371	Abbeokutone	0	Others	Others	C20H32O3	321.24	321.24	320.235	[M+H]+	3	16836-28-5	-	4.85075e+06	5.38861e+06	4.05124e+06	3.02176e+06	2.62011e+06	2.4958e+06	586636	725553	606307	1.13163e+06	1.67762e+06	1.82895e+06	628500	663874	716644	2.33751e+06	2.36088e+06	2.37504e+06	-	-	-
Yalp000545	N-Methyl-L-proline*	0	Amino acids and derivatives	Amino acids and derivatives	C6H11NO2	130.09	84.08	129.079	[M+H]+	2	475-11-6	C22223	2.71486e+07	2.29028e+07	2.62249e+07	1.00282e+07	8.49129e+06	9.59845e+06	8.85462e+06	1.0036e+07	8.25342e+06	8.69321e+06	7.62806e+06	7.61756e+06	1.09829e+07	9.46736e+06	9.91443e+06	1.22262e+07	1.45457e+07	1.29149e+07	-	C22223	-
ML10181668	1-Aminocyclopentanecarboxylate*	0	Amino acids and derivatives	Amino acids and derivatives	C6H11NO2	130.09	84.08	129.079	[M+H]+	2	52-52-8	C03969	2.58279e+07	2.36932e+07	2.64848e+07	9.72413e+06	9.33929e+06	9.68063e+06	1.03346e+07	9.02926e+06	8.51533e+06	8.61518e+06	8.76786e+06	7.71877e+06	1.10468e+07	1.06526e+07	9.61953e+06	1.35902e+07	1.40668e+07	1.2422e+07	-	C03969	-
PDP037696	1,2-dimethoxy-9H-xanthen-9-one	0	Flavonoids	Other Flavonoids	C15H12O4	257.08	197.06	256.074	[M+H]+	3	-	-	747009	693261	777250	284571	399410	506684	299946	304172	309528	583927	677631	652818	362004	354758	344378	755051	548758	586986	-	-	-
Lmhp012042	2-Linoleoylglycerol*	0	Lipids	Glycerol ester	C21H38O4	355.28	263.24	354.277	[M+H]+	1	3443-82-1	-	283355	259136	211549	177722	162084	181749	105396	121114	88040.4	159190	157547	179471	90698.4	80317.3	87811.9	263476	241800	239611	-	-	-
PDP085922	2-[(5E,8E)-tetradeca-5,8-dien-1-yl]cyclobutan-1-one	0	Lipids	Free fatty acids	C18H30O	263.24	95.08	262.23	[M+H]+	3	-	-	1.1116e+06	1.12087e+06	955606	681568	773977	793702	370377	450779	551071	476339	505503	525026	577911	613896	481469	827472	965378	891284	-	-	-
MWSmce089	N-p-Coumaroyltyramine*	0	Alkaloids	Phenolamine	C17H17NO3	284.12	147.04	283.121	[M+H]+	1	36417-86-4	-	2.55061e+06	2.64161e+06	2.37216e+06	827054	960571	952057	701905	727478	715768	640054	732511	738824	248635	306087	200785	1.24683e+06	1.26887e+06	1.0907e+06	-	-	-
PDP221612	Phosphatidylethanolamine lyso 17:0	0	Lipids	LPE	C22H46NO7P	468.33	327.29	467.301	[M+H]+	3	-	-	976133	1.00221e+06	814961	457910	424367	471967	311263	446143	344266	580564	601107	530670	357554	409879	424297	654874	588351	742107	-	-	-
Zmjp000182	N(omega)-Methyl-L-arginine*	0	Amino acids and derivatives	Amino acids and derivatives	C7H16N4O2	189.13	70.07	188.127	[M+H]+	1	17035-90-4	C03884	7.02734e+06	7.03635e+06	5.68157e+06	3.79074e+06	3.91806e+06	3.74144e+06	3.3518e+06	3.33923e+06	3.53668e+06	2.84649e+06	4.17582e+06	4.47601e+06	843187	726325	799779	4.20129e+06	4.0174e+06	4.14452e+06	-	C03884	-
Zmdp000292	Arginine methyl ester*	0	Amino acids and derivatives	Amino acids and derivatives	C7H16N4O2	189.14	70.07	188.127	[M+H]+	1	-	-	6.73499e+06	6.68576e+06	5.88171e+06	3.78738e+06	3.70636e+06	3.44559e+06	3.73725e+06	3.28886e+06	3.44392e+06	2.9772e+06	3.95362e+06	4.45024e+06	905407	715415	874373	3.91597e+06	3.95977e+06	4.09119e+06	-	-	-
PDP272743	(3R)-3-methyl-L-arginine	0	Amino acids and derivatives	Amino acids and derivatives	C7H16N4O2	189.14	84.08	188.127	[M+H]+	1	-	C22904	3.71685e+06	4.06706e+06	3.45652e+06	4.70611e+06	4.95947e+06	5.20971e+06	6.40901e+06	5.51145e+06	4.92157e+06	5.07435e+06	5.5183e+06	5.8759e+06	4.28978e+06	5.05822e+06	4.91152e+06	4.71568e+06	5.45515e+06	4.85683e+06	-	C22904	-
pme0122	N6-Acetyl-L-lysine	0	Amino acids and derivatives	Amino acids and derivatives	C8H16N2O3	189.12	126.09	188.116	[M+H]+	3	692-04-6	C02727	482603	554974	437350	592148	649651	553417	524232	570422	560298	480851	519004	680067	502901	634839	527905	499480	405914	463743	ko00310,ko01100	C02727	-
Wafp004641	N-Feruloyltyramine 4-glucoside	0	Alkaloids	Phenolamine	C24H29NO9	476.19	314.14	475.184	[M+H]+	3	-	-	684060	632678	930464	304582	665411	386197	323792	369491	253763	288940	336364	348371	243090	172587	218381	384408	435592	695931	-	-	-
Qmdp112405	Viteagnusin A	0	Terpenoids	Ditepenoids	C22H36O3	349.27	293.21	348.266	[M+H]+	2	-	-	235164	253412	198826	102665	113317	84784.8	51954.5	40790.3	37198.4	34923.3	52497.4	54813	93632.5	124809	88560.6	154099	149030	146386	-	-	-
Zblp006164	7,3',4'-trimethoxyquercetin-3-O-α-L-rhamnosyl(1→2)-β-D-glucopyranoside*	0	Flavonoids	Flavonols	C30H36O16	653.21	345.1	652.2	[M+H]+	1	-	-	4.29972e+06	4.55814e+06	3.92948e+06	7.97884e+06	7.63746e+06	8.60379e+06	9.15235e+06	9.98351e+06	9.1036e+06	1.10113e+07	1.17246e+07	1.10355e+07	9.16584e+06	1.00976e+07	8.65055e+06	8.56917e+06	7.96494e+06	8.19863e+06	-	-	-
Lajp006434	3',5'-dihydroxy-5,7,4'-trimethoxyflavone-3'-glucoside*	0	Flavonoids	Flavones	C24H26O12	507.15	345.1	506.142	[M+H]+	1	-	-	243888	360364	243659	629042	472343	658566	761349	624532	554984	664570	789805	604757	587058	541031	489874	460517	550810	446342	-	-	-
PDP226107	3-(3-{[(2s,3r,4s,5s,6r)-6-({[(2s,3r,4r,5s)-3,4-dihydroxy-5-(hydroxymethyl)oxolan-2-yl]methoxy}methyl)-3,4,5-trihydroxyoxan-2-yl]oxy}-4,5-dimethoxyphenyl)-5-hydroxy-7-methoxychromen-4-one*	0	Flavonoids	Flavones	C30H36O16	653.2	345.1	652.2	[M+H]+	1	-	-	3.8446e+06	3.63507e+06	3.72814e+06	6.488e+06	7.86751e+06	7.48921e+06	7.78663e+06	7.9581e+06	8.71625e+06	8.5256e+06	8.80368e+06	9.65176e+06	8.04037e+06	7.93082e+06	7.31502e+06	7.53881e+06	7.08516e+06	6.38375e+06	-	-	-
Lmxp010913	1-(9Z-Octadecenoyl)-2-(9-oxo-nonanoyl)-sn-glycero-3-phosphocholine	0	Lipids	Glycerol ester	C35H66NO9P	676.45	184.08	675.447	[M+H]+	1	-	-	1.17415e+07	9.76817e+06	7.14292e+06	8.17787e+06	8.18528e+06	7.7605e+06	5.51521e+06	6.6841e+06	6.42324e+06	8.95614e+06	9.11178e+06	9.79316e+06	7.101e+06	9.12174e+06	6.66932e+06	9.70524e+06	9.01483e+06	1.03188e+07	-	-	-
pmb2260	LysoPC 15:1	0	Lipids	LPC	C23H46NO7P	480.31	184.07	479.301	[M+H]+	3	-	-	103536	104328	83115.2	44039.6	72692.4	72878.8	74885.1	68328.6	64232.4	84685.2	75292.1	72082.6	41745.8	41464.6	43693.4	76730.7	80790.3	83072.9	-	-	-
Wcdp010180	9,11,13,15-Octadecatetraenal	0	Others	Aldehyde compounds	C18H28O	261.22	121.1	260.214	[M+H]+	3	148408-16-6	-	8.58665e+06	9.49816e+06	1.31013e+07	1.30937e+07	1.09003e+07	1.43307e+07	1.21905e+07	1.2223e+07	1.08285e+07	1.27087e+07	1.04804e+07	1.19243e+07	1.19272e+07	1.04348e+07	1.07732e+07	4.93308e+06	4.50876e+06	4.66796e+06	-	-	-
mws2101	Deoxyrhapontin	0	Others	Stilbene	C21H24O8	405.15	243.1	404.147	[M+H]+	1	30197-14-9	-	341217	272800	260555	158987	143109	170917	80100.6	89007.6	92097.2	142707	164905	185949	45794.2	32997.3	23553.1	146019	140229	159129	-	CM02306	MetMap152
Lahp004989	3,7,3'-Tri-O-methylquercetin-4'-O-β-D-apiofuranosyl-(1→2)-O-β-d-glucopyranoside*	0	Flavonoids	Flavonols	C29H34O16	639.19	345.1	638.185	[M+H]+	1	-	-	4.20303e+06	3.62868e+06	3.67815e+06	8.39638e+06	8.61923e+06	8.65013e+06	9.5137e+06	1.03442e+07	9.69753e+06	8.38502e+06	9.5663e+06	9.33076e+06	8.02183e+06	7.85882e+06	8.41587e+06	7.57762e+06	7.03993e+06	7.56607e+06	-	-	-
pmb0883	1-Octadecanoyl-sn-glycero-3-phosphoethanolamine	0	Lipids	LPE	C23H48NO7P	482.32	341.31	481.317	[M+H]+	3	69747-55-3	C21484	307546	245912	230461	163927	197843	159322	133303	170402	137226	192426	159181	185352	107267	114107	128008	243000	214243	234228	-	C21484	-
Qmdp112404	Viteagnusin B*	0	Terpenoids	Ditepenoids	C22H36O3	349.27	179.14	348.266	[M+H]+	2	-	-	651374	646776	590613	279004	264954	232347	133028	126628	137469	132629	134743	146277	274504	287336	267503	477435	480080	454156	-	-	-
Lmfp009701	Glycerol 9,11,13-octadecatrienoyl ester*	0	Lipids	Glycerol ester	C21H36O4	353.27	261.22	352.261	[M+H]+	1	-	-	1.25244e+06	1.28258e+06	999982	548438	473677	517717	429950	400770	381226	448440	437714	448618	669354	749372	693402	898440	965840	905163	-	-	-
Lmhp011388	2-α-Linolenoyl-glycerol*	0	Lipids	Glycerol ester	C21H36O4	353.27	261.22	352.261	[M+H]+	1	55268-58-1	-	1.17944e+06	1.05413e+06	834863	457804	469213	437745	408058	340983	374888	395887	407608	432116	571556	702115	628522	821201	900761	822963	-	-	-
Lmsp013116	Ent-16α,17-Dihydroxykauran-2-one	0	Terpenoids	Ditepenoids	C20H32O3	321.24	123.08	320.235	[M+H]+	1	-	-	9.84594e+06	1.18543e+07	8.67899e+06	6.66555e+06	5.74966e+06	5.59772e+06	1.44818e+06	1.46246e+06	1.18912e+06	2.73921e+06	3.83689e+06	4.34968e+06	1.47102e+06	1.5126e+06	1.55631e+06	5.74272e+06	5.8066e+06	5.89759e+06	-	-	-
pmb0876	LysoPE 16:0*	0	Lipids	LPE	C21H44NO7P	454.29	313.27	453.286	[M+H]+	1	53862-35-4	-	2.34308e+07	2.08589e+07	1.72031e+07	1.0597e+07	1.06389e+07	1.06279e+07	1.12302e+07	1.32688e+07	1.12153e+07	1.2655e+07	1.36933e+07	1.35582e+07	7.6424e+06	8.79873e+06	7.98182e+06	1.63637e+07	1.53971e+07	1.56945e+07	-	-	-
HX1368	dihydro-5-(hydroxymethyl)-2(3H)-furanone	0	Others	Others	C5H8O3	117.05	71.05	116.047	[M+H]+	3	-	-	1.86226e+06	1.68367e+06	1.58943e+06	776969	846545	870852	938834	868503	949037	757914	801888	816462	305924	232928	251357	841133	1.01547e+06	852501	-	-	-
Rfn0453	2-propyl-1,3,2-dioxazolidine*	0	Alkaloids	Alkaloids	C5H11NO2	118.09	58.07	117.079	[M+H]+	1	-	-	2.16986e+06	2.58716e+06	2.18217e+06	1.46796e+06	1.18116e+06	1.20283e+06	1.41292e+06	1.61833e+06	1.58154e+06	1.73269e+06	2.24789e+06	1.87534e+06	281601	290153	258374	1.67338e+06	1.64357e+06	1.61791e+06	-	-	-
PDP068719	4-amino-2-methylbutanoic acid*	0	Alkaloids	Alkaloids	C5H11NO2	118.09	58.07	117.079	[M+H]+	1	-	-	2.12726e+06	2.11421e+06	1.20268e+06	849081	753356	778394	1.44581e+06	1.35932e+06	916027	1.30152e+06	1.35724e+06	1.38691e+06	255936	239598	495475	966481	1.16933e+06	1.33474e+06	-	-	-
Wccp000476	2-[(1R)-1-carboxyethoxy]propanoic acid	0	Organic acids	Organic acids	C6H10O5	163.06	69.03	162.053	[M+H]+	2	-	-	165547	367826	327396	191393	299627	231122	242045	215223	236592	221293	138358	220478	214325	245542	186459	226213	264762	165060	-	-	-
pme0026	L-Lysine	0	Amino acids and derivatives	Amino acids and derivatives	C6H14N2O2	147.11	84.08	146.106	[M+H]+	3	56-87-1	C00047	4.09002e+07	4.31276e+07	4.33149e+07	1.56689e+07	1.62337e+07	1.47888e+07	1.47926e+07	1.37304e+07	1.24024e+07	1.21611e+07	1.1936e+07	1.15005e+07	4.65045e+06	4.33199e+06	4.62062e+06	1.86934e+07	2.12235e+07	2.02951e+07	ko00300,ko00310,ko00470,ko00780,ko00960,ko00970,ko01100,ko01110,ko01210,ko01230,ko02010	C00047	-
pme0193	L-Glutamine*	0	Amino acids and derivatives	Amino acids and derivatives	C5H10N2O3	147.08	84.04	146.069	[M+H]+	3	56-85-9	C00064	3.72664e+07	4.09412e+07	4.0841e+07	1.45497e+07	1.57946e+07	1.4114e+07	1.44103e+07	1.23808e+07	1.23626e+07	1.09629e+07	1.09001e+07	1.08074e+07	4.43325e+06	4.16866e+06	4.40372e+06	1.80113e+07	1.85215e+07	1.84509e+07	ko00220,ko00230,ko00240,ko00250,ko00470,ko00630,ko00750,ko00910,ko00970,ko01100,ko01230,ko01232,ko01240,ko02010	C00064	-
PDP227899	(3r)-4,5-dihydro-3h-pyrrole-2,3-diol*	0	Alkaloids	Alkaloids	C4H7NO2	102.05	56.05	101.048	[M+H]+	3	-	-	2.3304e+06	2.29861e+06	2.28119e+06	1.87533e+06	1.96042e+06	1.78228e+06	1.3541e+06	1.3449e+06	1.36047e+06	1.29563e+06	1.18032e+06	1.07724e+06	1.74586e+06	1.61473e+06	1.80007e+06	1.58658e+06	1.74732e+06	1.74961e+06	-	-	-
mws4052	1-Aminocyclopropane-1-carboxylate	0	Amino acids and derivatives	Amino acids and derivatives	C4H7NO2	102.06	56.05	101.048	[M+H]+	3	22059-21-8	C01234	692573	642404	680937	516506	560303	549855	375348	388328	380667	391104	354749	318495	475340	469196	420679	429489	514375	475469	ko00270,ko01100,ko01110	C01234	-
PDP010679	N2-(2-Hydroxysuccinoyl)arginine	0	Amino acids and derivatives	Amino acids and derivatives	C10H18N4O6	291.13	175.12	290.123	[M+H]+	3	87605-92-3	-	903620	1.11104e+06	848446	464114	414129	486807	321839	364667	354389	149984	207320	172889	111759	115244	71454	500406	562292	503266	-	-	-
mws0256	L-Valine	0	Amino acids and derivatives	Amino acids and derivatives	C5H11NO2	118.09	72.08	117.079	[M+H]+	1	72-18-4	C00183	2.3786e+07	2.09383e+07	1.95571e+07	1.53948e+07	1.56112e+07	1.65091e+07	1.9846e+07	2.04447e+07	1.94092e+07	2.00222e+07	2.02063e+07	1.9376e+07	1.48098e+07	1.39729e+07	1.36661e+07	1.71596e+07	1.99693e+07	1.70571e+07	ko00280,ko00290,ko00460,ko00770,ko00966,ko00970,ko01100,ko01110,ko01210,ko01230,ko01240,ko02010	C00183	-
Rlp0095	(S)-4-Aminovaleric acid	0	Alkaloids	Alkaloids	C5H11NO2	118.09	55.05	117.079	[M+H]+	1	1558-59-4	-	7.25839e+06	6.94948e+06	6.63723e+06	5.42776e+06	5.27123e+06	5.35549e+06	6.34709e+06	6.14404e+06	6.66686e+06	6.28621e+06	6.83563e+06	6.616e+06	4.98865e+06	4.72329e+06	5.00267e+06	5.82776e+06	6.0503e+06	5.77602e+06	-	-	-
PDP080396	2-Cyclopropyl-2-morpholinoacetic acid	0	Alkaloids	Alkaloids	C9H15NO3	186.11	140.11	185.105	[M+H]+	3	-	-	21268.1	26870.2	39591.1	29247.1	40889.9	39141.4	39309.6	49018.4	53860	50452.1	24323.2	63248	26409.2	35140.8	40966.7	39897.1	34002.2	36929.6	-	-	-
MWS201398	Hyp-Ser	0	Amino acids and derivatives	Amino acids and derivatives	C8H14N2O5	219.1	86.06	218.09	[M+H]+	3	-	-	356962	399630	296069	252330	253991	290304	264992	232153	244396	256843	197784	278168	261705	288872	250756	264808	309297	242682	-	-	-
MWS1860	Pyrrolidin	0	Alkaloids	Pyrrole alkaloids	C4H9N	72.08	55.05	71.0735	[M+H]+	3	123-75-1	-	286005	247144	213657	192841	236146	239353	189940	214566	164195	191563	213458	197669	203478	213952	164314	155312	208086	179549	-	-	-
PDP175625	2-{4-amino-1H-imidazo[4,5-d]pyridazin-1-yl}-5-(hydroxymethyl)oxolane-3,4-diol	0	Nucleotides and derivatives	Nucleotides and derivatives	C10H13N5O4	268.1	136.07	267.097	[M+H]+	3	-	-	109258	135625	123365	197203	173234	144967	141777	164263	177539	261111	160219	154789	149996	148941	166967	156596	163742	145970	-	-	-
PDP228792	(2r,3s,4s,5r,6r)-2-(hydroxymethyl)-6-(pyridin-3-ylmethoxy)oxane-3,4,5-triol*	0	Alkaloids	Alkaloids	C12H17NO6	272.11	110.06	271.106	[M+H]+	1	-	-	3.35443e+07	3.20852e+07	2.78746e+07	2.47834e+07	2.17537e+07	1.89757e+07	2.37897e+07	2.61583e+07	2.5061e+07	2.11332e+07	2.58292e+07	2.47137e+07	2.58721e+07	2.8468e+07	2.75501e+07	2.34053e+07	3.02691e+07	3.11527e+07	-	-	-
pma6298	3-Hydroxypyridine	0	Alkaloids	Pyridine alkaloids	C5H5NO	96.04	68.05	95.0371	[M+H]+	3	109-00-2	-	529300	665106	456776	319905	393213	284532	204797	169265	134754	375670	327201	415237	62537.4	53881.5	46493.4	367614	435379	291804	-	-	-
Rfn0920	2-(hydroxymethyl)pyridin-3-ol	0	Alkaloids	Alkaloids	C6H7NO2	126.06	108.05	125.048	[M+H]+	1	-	-	450502	571441	246931	256188	284590	280807	275694	205807	208689	318802	234041	306814	68180.3	62036.9	73239.5	297015	338543	242886	-	-	-
MWStz534	Kinsenoside	0	Others	Lactones	C10H16O8	282.12	103.04	264.084	[M+NH4]+	1	151870-74-5	-	4.20183e+06	3.8107e+06	3.00779e+06	4.8678e+06	4.89533e+06	5.27853e+06	5.85668e+06	4.82454e+06	4.2332e+06	4.15843e+06	4.4476e+06	5.01454e+06	5.15217e+06	4.53706e+06	5.00774e+06	4.02689e+06	5.44834e+06	4.2175e+06	-	-	-
pme1002	Tyramine	0	Alkaloids	Alkaloids	C8H11NO	138.09	103.05	137.084	[M+H]+	1	51-67-2	C00483	2.14445e+07	2.14048e+07	1.35753e+07	1.16243e+07	1.34005e+07	1.27962e+07	1.20556e+07	9.20414e+06	8.04529e+06	1.43567e+07	1.48475e+07	1.79664e+07	4.93613e+06	5.64711e+06	4.83735e+06	1.155e+07	1.52089e+07	1.21904e+07	ko00350,ko00950,ko01100,ko01110,ko01240	C00483	-
HX1349	dihydro-4-hydroxy-5-hydroxymethyl-2(3H)-furanone*	0	Others	Others	C5H8O4	133.05	69.04	132.042	[M+H]+	3	-	-	32462.1	39248.4	45212.4	50137.2	59436.9	61902.7	57450.2	62616.4	48243.8	62645.1	62177.4	56823.2	47983.5	61772.1	44944.7	55982.1	62458.6	61793.9	-	-	-
pmp001198	6-Deoxyfagomine	0	Alkaloids	Piperidine alkaloids	C6H13NO2	132.1	57.03	131.095	[M+H]+	1	197449-09-5	-	687090	639718	439530	694031	679861	617811	938326	731451	677210	729099	703343	723611	719606	690567	597593	597017	811172	640531	-	-	-
Sadp001334	2'-O-Methylcytidine*	0	Nucleotides and derivatives	Nucleotides and derivatives	C10H15N3O5	258.11	112.05	257.101	[M+H]+	3	2140-72-9	-	50703.7	59624.1	48370.9	56167	67485	54003.2	75102.5	55231	56260.9	70290.9	68823.9	68813.7	89006.7	57464.9	46330.4	44350.4	41440.5	38832.6	-	-	-
Ymjm000067	14-Hydroxyvibsanin F*	0	Terpenoids	Ditepenoids	C20H32O3	321.24	179.14	320.235	[M+H]+	1	-	-	2.54611e+07	2.507e+07	2.32228e+07	1.33353e+07	1.34661e+07	1.31097e+07	3.69964e+06	3.36107e+06	3.7726e+06	5.68851e+06	6.76477e+06	6.57725e+06	4.40093e+06	4.93505e+06	4.34157e+06	1.80612e+07	1.70293e+07	1.93013e+07	-	-	-
MWS1812	2-Undecanone	0	Others	Ketone compounds	C11H22O	171.17	55.05	170.167	[M+H]+	3	112-12-9	C01875	93818.9	95422.3	97483.6	83770.2	77321	81078.8	34009.4	55321.6	40929.5	37260.3	40488.4	49816.3	40790.2	56240.3	52171.5	46425.5	67351.1	56477.4	-	C01875	-
pma2987	L-Histidinol	0	Alkaloids	Alkaloids	C6H11N3O	142.1	124.09	141.09	[M+H]+	3	501-28-0	C00860	5.70884e+07	5.38667e+07	4.63608e+07	4.3365e+07	4.10952e+07	4.42733e+07	3.35563e+07	3.49149e+07	4.2298e+07	4.0043e+07	4.09841e+07	3.98445e+07	4.93199e+07	4.73694e+07	4.2715e+07	3.81696e+07	4.50379e+07	4.29948e+07	ko00340,ko01100,ko01110,ko01230	C00860	-
PDP106311	Proline Arginine dipeptide	0	Amino acids and derivatives	Amino acids and derivatives	C11H21N5O3	272.17	70.07	271.164	[M+H]+	3	-	-	52412.7	39657.4	53629	35139	45584.2	40466.3	40618	33848.3	39764.6	39735.6	70268.8	44976.8	39079	33655.7	40469.4	35755.5	33857.6	63083.2	-	-	-
pmd0146	LysoPC 20:2(2n isomer)*	0	Lipids	LPC	C28H54NO7P	548.37	184.07	547.364	[M+H]+	3	-	-	166335	172277	131868	107121	115794	128846	120372	119095	109246	88648.9	120728	141759	68501.6	98681.9	98071.6	145276	121118	125155	-	-	-
Lmjp004581	Integracide H	0	Terpenoids	Triterpene	C36H54O7	599.4	337.21	598.387	[M+H]+	3	-	-	1.54589e+06	1.79534e+06	1.74034e+06	1.58614e+06	1.09734e+06	1.32695e+06	1.24322e+06	1.20985e+06	1.35862e+06	1.32999e+06	1.38895e+06	1.60926e+06	1.49387e+06	1.35293e+06	1.85982e+06	742911	881190	492084	-	-	-
Zkep154151	N2-Malonyl-D-tryptophan	0	Amino acids and derivatives	Amino acids and derivatives	C14H14N2O5	291.09	159.09	290.09	[M+H]+	2	3184-74-5	C03414	195750	221080	156624	154029	151125	127043	83933.2	103747	96173.7	86018	66847.7	94664	194900	110816	166236	157068	217737	148815	-	C03414	-
Hmsp004517	[4]-Gingerol	0	Phenolic acids	Phenolic acids	C15H22O4	267.15	137.06	266.152	[M+H]+	1	77398-90-4	-	192778	143691	101045	36168.5	37631.5	43133.2	19958.2	38584.8	35686.7	45783.9	45176.8	46572.3	36353.1	49705.9	40449.5	68495.7	125622	90848.8	-	-	-
PD0119734	12-methyltetracyclo[8.3.1.02,5.07,12]tetradec-8-en-1-ol	0	Terpenoids	Sesquiterpenoids	C15H22O	219.17	121.1	218.167	[M+H]+	2	-	-	180427	188411	159749	229189	191935	206045	223676	213810	224251	179998	156441	212933	231323	215279	222938	219496	220236	178282	-	-	-
Zmsp009398	2-hydroxy-3-{[(2r,3r,4s,5r,6r)-3,4,5-trihydroxy-6-({[(2s,3r,4s,5r,6r)-3,4,5-trihydroxy-6-(hydroxymethyl)oxan-2-yl]oxy}methyl)oxan-2-yl]oxy}propyl hexadecanoate	0	Others	Others	C31H58O14	655.38	313.27	654.383	[M+H]+	1	-	-	119861	216512	66502.9	167726	185471	97990.7	120632	112772	101321	107204	75601.9	107657	93921.1	115116	97662.6	116861	149984	182998	-	-	-
pmb0881	LysoPE 18:2*	0	Lipids	LPE	C23H44NO7P	478.29	337.27	477.286	[M+H]+	1	-	-	1.25146e+07	1.08875e+07	9.69877e+06	6.62121e+06	6.55878e+06	7.32048e+06	5.86157e+06	7.62731e+06	5.8039e+06	6.05988e+06	6.83175e+06	7.39601e+06	5.66946e+06	6.33283e+06	5.57252e+06	9.09228e+06	9.07823e+06	9.41918e+06	-	-	-
Zahp007763	N-Isobutyl-(2E,4E)-hexadeca-2,4-dienamide	0	Alkaloids	Alkaloids	C20H37NO	308.29	97.1	307.288	[M+H]+	2	54794-69-3	-	30166.1	95707.2	29181.1	46155.8	66951.7	65318.6	87096.4	76092.6	77564.8	194106	55810.2	46487.8	140302	53570.9	105511	54779.7	38119.5	58940.1	-	-	-
MWS2035	2,6-Di-Tert-Butyl-1,4-Benzoquinone	0	Quinones	Quinones	C14H20O2	221.15	57.07	220.146	[M+H]+	3	719-22-2	-	67669.7	52939.8	62000.1	47250.2	46314.1	55787.1	46446.6	60599.2	32369	37312.9	45593.8	62053.1	46316.7	63164.7	62606.3	28748.2	44884.2	30183.6	-	-	-
Zmjp000624	Pyridoxal	0	Others	Vitamin	C8H9NO3	168.06	150.05	167.058	[M+H]+	3	66-72-8	C00250	64686.3	60307.8	84069.2	45761.2	43466.9	27417.8	43715.3	44736.8	82008.9	57071.3	57038.2	54888.4	48605.5	28221.6	42474.2	40106.3	55321.9	55393.5	ko00750,ko01100,ko01240	C00250	-
PDP223521	4-(2,5-Dimethylphenyl)-2,2-dimethylbutanoic acid	0	Others	Others	C14H20O2	221.15	119.08	220.146	[M+H]+	2	-	-	160608	72970.5	93416.4	91985.8	74767.4	119016	73526.1	129413	81774.7	97387.7	74758.1	73615.5	95738.5	92640.5	101700	53445.9	39628.7	41816.5	-	-	-
PDP008486	Dehydrocarissone	0	Others	Others	C14H20O2	221.15	119.08	220.146	[M+H]+	3	64057-46-1	-	175265	195476	158155	493559	497142	473384	425086	457851	418583	518261	473083	513098	464838	517044	444813	300019	402536	364434	-	-	-
MW0012704	18-Hydroxy-5Z,8Z,11Z,14Z-eicosatetraenoic acid	0	Lipids	Free fatty acids	C20H32O3	321.24	123.08	320.235	[M+H]+	3	133268-58-3	-	9.69639e+06	1.13445e+07	8.21246e+06	6.67081e+06	5.5924e+06	5.69197e+06	1.35822e+06	1.45476e+06	1.17324e+06	2.73195e+06	3.93328e+06	4.26714e+06	1.44525e+06	1.56146e+06	1.55863e+06	5.51227e+06	5.41719e+06	5.5101e+06	-	-	-
Zbnp004589	Limocitrin 7-neohesperidoside	0	Flavonoids	Flavonols	C29H34O17	655.19	347.07	654.18	[M+H]+	3	-	-	288511	362132	303403	160009	114262	252064	166027	173758	160957	135252	122679	144979	149921	117846	81268.9	195904	139823	153149	-	-	-
Lmhp010757	LysoPE 20:2*	0	Lipids	LPE	C25H48NO7P	506.32	365.31	505.317	[M+H]+	3	-	-	79685.2	94672.2	58124.2	28786.1	39760.8	33179.5	22195.2	35436.3	32191.4	43443	44506.8	47478.9	30106.6	24654.1	24918	57068.3	48097.4	52125.4	-	-	-
pmb1650	Octadeca-11E,13E,15Z-trienoic acid	0	Lipids	Free fatty acids	C18H30O2	279.23	149.13	278.225	[M+H]+	3	25575-00-2	-	2.56665e+06	2.26427e+06	2.08174e+06	2.25149e+06	1.86757e+06	1.70073e+06	1.38151e+06	1.77179e+06	1.58249e+06	1.46956e+06	1.10882e+06	1.93342e+06	1.91117e+06	1.02096e+06	919491	632824	947417	753478	-	-	-
PD0699908	Phe-Asn	0	Amino acids and derivatives	Amino acids and derivatives	C13H17N3O4	280.13	120.08	279.122	[M+H]+	3	-	-	112636	113360	81502.8	76007.6	84972.5	79083.3	54697.4	74013.9	82457.5	56525	68423.6	57199.1	86765.2	76529.9	76311.3	81811.2	101587	84296.9	-	-	-
PDP004301	Nevadensin 7-glucoside*	0	Flavonoids	Flavones	C24H26O12	507.15	345.1	506.142	[M+H]+	1	-	-	261970	345310	257735	588782	534704	421611	860841	576249	633593	896914	647378	792122	817074	823108	656497	591639	578806	652704	-	-	-
pmd0136	LysoPC 18:0(2n isomer)	0	Lipids	LPC	C26H54NO7P	524.37	184.07	523.364	[M+H]+	1	-	-	3.79529e+06	3.61225e+06	2.70804e+06	2.33327e+06	2.33524e+06	2.1572e+06	2.5478e+06	2.80947e+06	2.59335e+06	2.33877e+06	2.71257e+06	2.62563e+06	1.51217e+06	1.99635e+06	1.65185e+06	3.20769e+06	2.78407e+06	3.15437e+06	-	-	-
MWS00411g	L-2-Aminoadipate	0	Amino acids and derivatives	Amino acids and derivatives	C6H11NO4	162.08	98.06	161.069	[M+H]+	3	1118-90-7	C00956	114325	129240	117991	176023	163465	106507	152136	127589	158422	169625	126849	157011	160690	173786	137592	118701	153507	119059	ko00300,ko00310,ko01100,ko01110,ko01210,ko01230	C00956	-
PDP231917	(4r)-5-amino-4-hydroxy-2-oxopentanoic acid*	0	Alkaloids	Alkaloids	C5H9NO4	148.06	84.04	147.053	[M+H]+	2	-	-	6.17833e+07	5.82918e+07	6.07671e+07	5.43116e+07	5.19616e+07	4.93301e+07	3.69579e+07	3.57345e+07	3.45636e+07	3.3209e+07	3.31813e+07	3.21567e+07	4.74838e+07	4.0468e+07	4.47401e+07	4.43494e+07	4.81448e+07	4.64685e+07	-	-	-
mws1346	DL-2-Aminoadipic acid	0	Alkaloids	Alkaloids	C6H11NO4	162.08	98.06	161.069	[M+H]+	3	542-32-5	C00956	360853	349871	331792	543699	555423	486097	679438	600393	550166	509506	559272	528658	469805	503036	509282	439934	473335	469835	ko00300,ko00310,ko01100,ko01110,ko01210,ko01230	C00956	-
mws0875	Cys-Gly	0	Amino acids and derivatives	Amino acids and derivatives	C5H10N2O3S	179.05	76.02	178.041	[M+H]+	3	19246-18-5	C01419	423991	243948	329626	211228	185200	246715	258180	224799	213529	138248	256959	228750	208541	148037	144302	184766	244960	194407	ko00480,ko01100	C01419	-
Cmsp010182	Isocupressic acid	0	Terpenoids	Ditepenoids	C20H32O3	321.24	149.13	320.235	[M+H]+	3	1909-91-7	-	910720	862194	844189	549231	513205	470799	136532	169666	152372	204486	253169	300016	155051	203125	177117	651330	601783	605297	-	-	-
pme3388	Homoarginine	0	Amino acids and derivatives	Amino acids and derivatives	C7H16N4O2	189.13	144.1	188.127	[M+H]+	2	156-86-5	C01924	2.81892e+06	2.46407e+06	2.6264e+06	1.38583e+06	1.36349e+06	1.40362e+06	1.70015e+06	1.67943e+06	1.69452e+06	1.32387e+06	1.94559e+06	1.89178e+06	554479	713746	690061	1.69024e+06	1.60311e+06	1.59781e+06	-	C01924	-
Lmsp010763	Monolinolenin*	0	Lipids	Glycerol ester	C21H36O4	353.27	261.22	352.261	[M+H]+	1	75685-85-7	-	343336	323425	229835	147973	192076	143876	131764	129858	127227	155297	151479	176280	152112	145348	173815	286566	322917	294875	-	-	-
Lmhp011562	1-α-Linolenoyl-glycerol*	0	Lipids	Glycerol ester	C21H36O4	353.27	261.22	352.261	[M+H]+	1	-	-	1.13023e+06	1.10248e+06	917414	488680	486710	424916	372315	398919	365759	384179	442474	399070	603462	633237	606401	823922	848794	760913	-	-	-
Qmzp101823	Hinokinin	0	Lignans and Coumarins	Lignans	C20H18O6	355.12	135.04	354.11	[M+H]+	3	26543-89-5	C10627	1.02358e+06	995962	917237	624203	777878	676596	266574	311581	235214	290637	415717	342406	334691	297346	312768	837428	845449	716071	-	C10627	-
Zbkp000561	L-4-Hydroxyglutamate semialdehyde*	0	Alkaloids	Alkaloids	C5H9NO4	148.06	84.05	147.053	[M+H]+	2	-	C05938	5.6163e+07	5.30117e+07	5.82634e+07	4.81682e+07	4.91343e+07	4.59321e+07	3.51345e+07	3.57373e+07	3.1056e+07	2.77431e+07	3.18254e+07	2.78318e+07	4.40136e+07	4.10684e+07	4.28423e+07	3.96596e+07	4.31279e+07	3.91991e+07	ko00330,ko01100	C05938	-
pmb2406	LysoPC 17:0*	0	Lipids	LPC	C25H52NO7P	510.36	184.07	509.348	[M+H]+	2	50930-23-9	-	2.08622e+06	2.06455e+06	1.55728e+06	1.17609e+06	1.1611e+06	1.23429e+06	1.00346e+06	1.17791e+06	985600	1.2279e+06	1.39434e+06	1.40201e+06	820853	961082	873761	1.57679e+06	1.53151e+06	1.49345e+06	-	-	-
PDP239458	Phosphatidylcholine lyso 17:0*	0	Lipids	LPC	C25H52NO7P	510.35	184.07	509.348	[M+H]+	2	68659-01-8	-	2.55788e+06	2.40143e+06	1.97899e+06	1.37266e+06	1.45092e+06	1.43999e+06	1.22473e+06	1.5878e+06	1.18419e+06	1.65707e+06	1.77806e+06	1.68751e+06	1.09435e+06	1.19607e+06	1.15039e+06	2.0034e+06	1.904e+06	1.8402e+06	-	-	-
Lamp000484	4-Methylazetidine-2-Carboxylic acid	0	Alkaloids	Alkaloids	C5H9NO2	116.07	70.06	115.063	[M+H]+	1	1779725-63-1	-	2.84037e+07	2.36139e+07	2.39083e+07	1.1243e+07	1.02615e+07	9.88968e+06	1.68596e+07	1.61435e+07	1.61632e+07	1.00979e+07	1.32486e+07	1.2e+07	5.21519e+06	4.17146e+06	4.16494e+06	1.24797e+07	1.51267e+07	1.27074e+07	-	-	-
pme0006	L-Proline*	0	Amino acids and derivatives	Amino acids and derivatives	C5H9NO2	116.07	70.07	115.063	[M+H]+	1	147-85-3	C00148	4.43408e+07	3.63799e+07	4.1092e+07	1.97859e+07	1.83769e+07	2.00146e+07	3.27021e+07	3.15837e+07	2.87043e+07	2.14652e+07	2.79934e+07	2.47881e+07	8571139	7.41799e+06	7.47546e+06	2.46358e+07	2.80729e+07	2.4195e+07	ko00330,ko00470,ko00970,ko01100,ko01110,ko01230,ko02010	C00148	-
MWS201411	Lys-Asn	0	Amino acids and derivatives	Amino acids and derivatives	C10H20N4O4	261.16	84.08	260.149	[M+H]+	3	19908-06-6	-	135334	160883	173599	111398	115734	134094	107237	153753	120202	134943	153651	128991	112165	166804	112629	123166	155803	132780	-	-	-
Zahp006511	N-((9E,11E)-13-methylpentadeca-9,11-dien-1-yl)acetamide	0	Alkaloids	Alkaloids	C18H33NO	280.25	67.05	279.256	[M+H]+	2	-	-	220867	178977	198426	69225	67739.7	81127	87267.6	108456	81262.8	190600	52727.7	47479.8	92592.6	88254.7	74506.9	176369	140430	144108	-	-	-
PDP286004	(5R)-5-(methylaminomethyl)oxolan-2-one*	0	Alkaloids	Alkaloids	C6H11NO2	130.1	84.08	129.079	[M+H]+	2	-	-	2.64898e+07	2.29572e+07	2.66422e+07	1.00522e+07	8.61905e+06	9.45906e+06	9.65942e+06	1.06872e+07	8.87885e+06	8.27419e+06	8.28947e+06	7.78795e+06	1.06876e+07	1.00597e+07	9.93258e+06	1.41309e+07	1.40605e+07	1.30093e+07	-	-	-
PDP237215	2-[(2r,6s,8s)-1,2-dimethyltetracyclo[4.4.0.02,4.03,7]decan-8-yl]propanal*	0	Terpenoids	Sesquiterpenoids	C15H22O	219.17	121.1	218.167	[M+H]+	3	-	-	159872	142177	208981	198799	175106	227857	167873	200350	215616	153912	213153	168161	225674	225951	190038	219043	175067	164951	-	-	-
mws0126	LysoPC 18:0	0	Lipids	LPC	C26H54NO7P	524.37	184.07	523.364	[M+H]+	1	19420-57-6	-	4.50586e+06	4.3842e+06	3.44924e+06	3.09386e+06	3.00191e+06	2.95568e+06	3.29388e+06	3.72037e+06	3.40493e+06	3.25534e+06	3.37345e+06	3.30335e+06	2.02715e+06	2.36104e+06	2.18198e+06	4.09701e+06	3.58974e+06	3.99595e+06	-	-	-
WapTKC134016	15-Hydroxy-2,10-Bisaboladien-1-one*	0	Terpenoids	Sesquiterpenoids	C15H24O2	237.19	135.08	236.178	[M+H]+	2	-	-	166093	165747	144534	220181	277559	238287	246138	250057	215609	189227	221249	185177	265458	305768	246551	225713	206159	241056	-	-	-
Lmcp000282	L-Carnitine	0	Alkaloids	Alkaloids	C7H15NO3	162.11	85.03	161.105	[M+H]+	3	541-15-1	C00318	1.05006e+07	1.05984e+07	8.80023e+06	4.28122e+06	8.24866e+06	5.78376e+06	5.27251e+06	5.90782e+06	4.69014e+06	3.41733e+06	5.26849e+06	7.91981e+06	5.48591e+06	5.76735e+06	3.42168e+06	4.35888e+06	6.21165e+06	4.9351e+06	-	C00318	-
Lmhp009129	LysoPC 15:0(2n isomer)*	0	Lipids	LPC	C23H48NO7P	482.32	184.07	481.317	[M+H]+	1	-	-	343435	388802	294532	243589	219755	215174	84690.1	118118	113836	101030	84320.3	90772.7	127586	163695	135240	216972	206346	209881	-	-	-
PD0203720	4-Ethyl-L-glutamic acid	0	Amino acids and derivatives	Amino acids and derivatives	C7H13NO4	176.09	130.09	175.084	[M+H]+	3	20913-68-2	-	453066	458985	397877	178595	209873	178314	246103	228490	204580	204341	151774	191422	186571	110267	190441	258009	335923	225177	-	-	-
WapTKC008405	Simirane B*	0	Terpenoids	Ditepenoids	C20H28O2	301.22	131.08	300.209	[M+H]+	2	1346750-71-7	-	83425.4	56876.3	42868.7	97845.1	115174	119903	81026.8	125394	115244	111053	95409.5	35758.5	71631.3	117522	76543.3	158690	120343	121254	-	-	-
Walp007137	2-AminoicoSane-1,6,18,19,20-pentaol	0	Lipids	Sphingolipids	C20H43NO5	378.32	286.28	377.314	[M+H]+	3	-	-	186090	174154	171304	181731	177336	141194	132447	151252	114592	123664	128990	127965	152994	152748	88995.2	153175	127143	146097	-	-	-
WapTKC015266	Yucalexin B7	0	Terpenoids	Ditepenoids	C20H28O2	301.22	131.09	300.209	[M+H]+	2	64657-12-1	-	651236	554971	616767	40018.9	39152.1	57298.3	42662.6	28310.6	25850.2	215722	239192	196889	17656.9	23729	37097	184889	216630	192078	-	-	-
Wcdp004275	Lauramine oxide	0	Others	Others	C14H31NO	230.25	57.07	229.241	[M+H]+	2	1643-20-5	-	141652	123304	103113	86861.6	121756	94185.1	89555	107851	95557.3	114299	143986	126926	126131	108513	89379	184607	187281	177133	-	-	-
Lhzp110924	9-O-demethyllycosinine B*	0	Alkaloids	Pyrrole alkaloids	C17H17NO3	284.13	147.04	283.121	[M+H]+	1	-	-	2.71393e+06	2.62489e+06	2.38002e+06	814187	1.06937e+06	981138	729989	789528	743857	615561	694971	683825	249368	249307	235292	1.24234e+06	1.16853e+06	1.21338e+06	-	-	-
Wasyqp5995	2-Aminooctadecane-1,5,17-triol	0	Lipids	Sphingolipids	C18H39NO3	318.3	256.26	317.293	[M+H]+	2	-	-	231300	227965	169923	125312	136902	66410.9	136652	133334	31372.7	111314	165318	48365.7	192880	147928	67235.5	207452	183205	207197	-	-	-
Lmhp010514	LysoPE 20:2(2n isomer)*	0	Lipids	LPE	C25H48NO7P	506.32	365.31	505.317	[M+H]+	3	-	-	58342.7	93758	61077.4	33850.5	41963.9	33836.2	33344.3	32448.6	50309.1	43190.9	37720.7	26197.9	32123.9	25981.8	19890.3	39277.2	27467.2	50856.1	-	-	-
pmb0855	LysoPC 16:0*	0	Lipids	LPC	C24H50NO7P	496.34	184.07	495.332	[M+H]+	1	17364-16-8	-	3.10861e+07	2.71384e+07	2.46426e+07	1.77266e+07	1.76378e+07	1.58538e+07	2.01955e+07	2.62971e+07	1.91716e+07	1.76457e+07	1.99753e+07	1.95205e+07	1.08962e+07	1.46206e+07	1.19336e+07	2.29341e+07	2.20159e+07	2.33002e+07	-	-	-
Sadp004725	3-amino-4-methylbenzamide	0	Alkaloids	Alkaloids	C8H10N2O	151.09	108.07	150.079	[M+H]+	3	-	-	1.42445e+06	1.71149e+06	1.30865e+06	1.26001e+06	1.11964e+06	576928	1.08161e+06	1.00853e+06	912590	1.26442e+06	1.0155e+06	1.22911e+06	1.01571e+06	784809	672384	595487	1.2179e+06	651095	-	-	-
Qmdp112312	Vitetrifolin A	0	Terpenoids	Ditepenoids	C20H32O3	321.24	111.04	320.235	[M+H]+	3	-	-	764576	646260	653141	376989	388614	404339	107342	113644	96740.3	150921	213290	194804	140932	148305	141777	481242	498064	501494	-	-	-
Wcfp002357	N6-Threonylcarbamoyladenosine	0	Nucleotides and derivatives	Nucleotides and derivatives	C15H20N6O8	413.14	162.04	412.134	[M+H]+	1	24719-82-2	-	384776	534231	550229	647490	429300	705999	1.11821e+06	859954	753218	770591	572869	913559	1.04259e+06	582788	551213	667178	622729	890658	-	-	-
Zjyp102920	oxyphyllanene E	0	Terpenoids	Sesquiterpenoids	C15H24O2	237.18	159.12	236.178	[M+H]+	2	-	-	248360	226932	224774	357546	363987	389175	335472	330259	327659	264525	268391	248241	390226	347598	385506	311226	314094	392918	-	-	-
PDP295094	(8E,10E,14E)-5,12-dihydroxyicosa-8,10,14-trienoic acid	0	Lipids	Free fatty acids	C20H34O4	339.25	321.24	338.246	[M+H]+	3	-	-	3.27448e+06	3.16038e+06	2.73848e+06	1.71275e+06	2.04746e+06	1.72596e+06	564514	563668	603066	715801	945971	814095	729720	668898	684856	2.47495e+06	2.41854e+06	2.33642e+06	-	-	-
Lmyp008281	1,4-Dihydroxy-2-methylanthraquinone	0	Quinones	Anthraquinone	C15H10O4	255.07	227.07	254.058	[M+H]+	3	2589-39-1	C10329	200645	167486	204840	75823.6	99983.1	143039	70960.7	85031.4	99136.9	135594	146004	144008	113010	106075	67015.6	156553	151147	138734	-	C10329	-
Zmsp006106	3-(((2S,3R,4S,5S,6R)-6-((((2R,3R,4R,6S)-3,4-dihydroxy-6-methyltetrahydro-2H-pyran-2-yl)oxy)methyl)-3,4,5-trihydroxytetrahydro-2H-pyran-2-yl)oxy)-5,6-dihydroxy-2-(3-hydroxy-4-methoxyphenyl)-7-methoxy-4H-chromen-4-one*	0	Flavonoids	Flavonols	C29H34O16	639.19	345.1	638.185	[M+H]+	1	-	-	3.98607e+06	3.71569e+06	3.6681e+06	8.67838e+06	8.6857e+06	7.7338e+06	8.85609e+06	9.75896e+06	9.33024e+06	9.58104e+06	9.27997e+06	8.91608e+06	8.14569e+06	8.05078e+06	7.8397e+06	7.1034e+06	7.49176e+06	7.83235e+06	-	-	-
WaYp007695	2-Aminooctadecane-1,16,18,18-tetraol	0	Lipids	Sphingolipids	C18H39NO4	334.3	242.25	333.288	[M+H]+	1	-	-	807784	747569	616073	755149	704806	467792	449873	544549	287349	414106	460055	297598	639523	608512	355812	506167	453746	534313	-	-	-
PDP247301	6-acetamido-3-aminohexanoic acid	0	Alkaloids	Alkaloids	C8H16N2O3	189.12	70.07	188.116	[M+H]+	2	-	-	7.01541e+06	6.90584e+06	7.09089e+06	3.55744e+06	3.45535e+06	3.44215e+06	4.38391e+06	3.68531e+06	3.85303e+06	2.85721e+06	4.68645e+06	4.74996e+06	737002	812613	658349	3.79374e+06	4.21185e+06	3.89681e+06	-	-	-
PDP062869	Tilarginine Acetate	0	Amino acids and derivatives	Amino acids and derivatives	C7H16N4O2.C2H4O2	189.13	70.06	188.127	[M+H]+	2	-	-	7.56454e+06	7.24447e+06	6.78286e+06	3.67369e+06	3.8908e+06	3.53249e+06	4.18306e+06	3.97065e+06	4.21947e+06	2.95769e+06	4.79853e+06	4.70336e+06	771531	719785	740283	3.96615e+06	4.44495e+06	3.8558e+06	-	-	-
PDP291047	beta-alanyl-l-leucine	0	Amino acids and derivatives	Amino acids and derivatives	C9H18N2O3	203.14	86.1	202.132	[M+H]+	3	17136-25-3	-	199899	150003	180489	159117	143812	126533	99744.4	128611	84012.1	92158.3	81992.3	161258	117912	186207	100878	102167	138179	152645	-	-	-
pmp000344	3',4',7-Trihydroxyflavone	0	Flavonoids	Flavones	C15H10O5	271.06	243.06	270.053	[M+H]+	3	2150-11-0	-	280307	280939	359354	149040	122095	168771	109630	126913	108566	153522	145984	159242	20277.9	28525.4	18046	144729	145901	106136	-	-	-
Lmhp008688	LysoPE 20:5	0	Lipids	LPE	C25H42NO7P	500.28	359.26	499.27	[M+H]+	2	-	-	61869.8	53209.6	27960.8	30433.8	26489.3	32724.1	18486.7	32209	19879.5	20094.5	13702.9	10504.5	15401.2	18265.1	16092.4	22874.3	31896.5	29087.8	-	-	-
zjbp111629	2-[(2β,4αβ,8β,8αβ)-decahydro-4α-hydroxy-8,8α-dimethylnaphthalen-2-yl]prop-2-enal	0	Terpenoids	Sesquiterpenoids	C15H24O2	237.18	109.1	236.178	[M+H]+	2	-	-	374058	430478	365154	624626	651824	602022	557690	565527	530279	417189	474520	454413	660242	722040	602984	550686	564223	544080	-	-	-
Rfn09758	(5S,8S,9R,10S)-selina-4(14),7(11)-diene-8,9-diol*	0	Terpenoids	Sesquiterpenoids	C15H24O2	237.18	121.1	236.178	[M+H]+	1	-	-	766239	681253	670547	1.22837e+06	1.21726e+06	1.0937e+06	1.02159e+06	1.11403e+06	1.10144e+06	793638	866630	892405	1.1298e+06	1.48606e+06	1.11674e+06	1.04845e+06	1.01202e+06	1.12497e+06	-	-	-
pmp001273	LysoPC 18:2*	0	Lipids	LPC	C26H50NO7P	520.34	184.07	519.332	[M+H]+	1	-	-	121791	136808	82244.9	60483.8	72220.5	51975.1	42771.4	75438.9	62191.4	61483.3	55730.6	72529.1	78324.5	64819.1	45217.9	81601.2	84835.2	57727.4	-	-	-
Lmhp008589	LysoPE 18:3(2n isomer)*	0	Lipids	LPE	C23H42NO7P	476.28	335.26	475.27	[M+H]+	1	-	-	801059	747638	553098	513884	548835	510299	384229	507514	442467	346942	342418	317741	427668	424516	352330	349127	494604	368518	-	-	-
MW0155201	Phe-Gly-Val	0	Amino acids and derivatives	Amino acids and derivatives	C16H23N3O4	322.17	160.08	321.169	[M+H]+	3	-	-	6.63186e+06	7.98371e+06	6.11696e+06	3.38704e+06	4.65682e+06	3.8384e+06	4.15032e+06	4.37118e+06	4.71565e+06	4.79521e+06	4.69489e+06	5.39507e+06	4.3044e+06	8.01437e+06	4.37614e+06	4.12132e+06	4.70002e+06	5.04956e+06	-	-	-
Rfn02085	6-methyl-4-{[3,4,5-trihydroxy-6-(hydroxymethyl)oxan-2-yl]oxy}-2H-pyran-2-one	0	Others	Lactones	C12H16O8	289.09	127.04	288.084	[M+H]+	2	-	-	1.37543e+06	1.3261e+06	1.26252e+06	930392	1.08746e+06	997586	863231	1.00397e+06	970781	856630	940965	929509	1.0758e+06	1.16171e+06	1.09877e+06	1.07457e+06	949364	1.15562e+06	-	-	-
mws1075	Herniarin	0	Lignans and Coumarins	Coumarins	C10H8O3	177.05	121.06	176.047	[M+H]+	3	531-59-9	C09268	72839.8	91953.5	105193	80412.7	64308.7	78768.1	64973.1	54028	65678.3	83226	38265.1	77967.3	68223.3	70164.7	78677.8	54865.7	64558.3	47733	-	C09268	-
Lmcp002302	N6-(2-Hydroxyethyl)adenosine*	0	Nucleotides and derivatives	Nucleotides and derivatives	C12H17N5O5	312.13	180.09	311.123	[M+H]+	3	4338-48-1	-	190783	209573	202177	244958	270958	171806	324020	339756	324028	327592	260332	299331	251108	311229	241298	157505	262219	235282	-	-	-
PDP266736	chrysophanol 1-o-beta-d-(6'-o-malonyl)glucoside	0	Quinones	Anthraquinone	C24H22O12	503.12	255.07	502.111	[M+H]+	1	-	-	2.0861e+06	1.82102e+06	1.52103e+06	720298	734645	786690	309631	304805	343591	461784	508528	427241	72413.9	69314	59844.9	785663	767178	819399	-	-	-
PDP022349	3,3'-dimethoxy-9,10-dihydro-[1,1'-biphenanthrene]-4,4',7,7'-tetrol	0	Quinones	PhenAnthraquinones	C30H24O6	481.16	239.07	480.157	[M+H]+	3	-	-	243896	325112	298456	133417	185993	254526	122025	168965	131826	209468	252029	161313	41928	38027	40070.3	228460	220679	233729	-	-	-
Zbzp003763	11-methoxy viburtinal	0	Terpenoids	Monoterpenoids	C10H8O3	177.05	134.04	176.047	[M+H]+	2	-	-	3.71705e+06	3.5709e+06	2.38483e+06	3.23684e+06	1.88401e+06	1.72078e+06	2.25206e+06	2.51335e+06	2.62272e+06	2.0962e+06	3.02411e+06	2.32627e+06	1.97067e+06	1.20052e+06	1.5095e+06	2.34815e+06	3.08984e+06	2.13647e+06	-	-	-
mws1336	4-Aminobenzoate	0	Phenolic acids	Phenolic acids	C7H7NO2	138.06	120.04	137.048	[M+H]+	2	150-13-0	C00568	1.06861e+06	1.03851e+06	943359	714768	782423	862696	356183	399449	409914	353787	346871	368058	309336	309144	293836	744938	546659	595276	ko00790,ko01100,ko01240	C00568	-
Lhmp121004	Symplocosin*	0	Lignans and Coumarins	Lignans	C26H32O11	521.2	131.05	520.194	[M+H]+	2	11042-30-1	-	30235.1	21750	46836.5	83077.5	164840	167729	135023	79768	84858.9	128533	131454	134269	30356.3	61386.1	46364	132936	74530.8	112032	-	-	-
Sadp000763	2-amino-5-[(C-hydroxycarbonimidoyl)amino]pentanimidic acid	0	Alkaloids	Alkaloids	C6H14N4O2	175.12	70.07	174.112	[M+H]+	1	-	-	823913	739526	658919	183385	232848	215514	236446	197989	247627	186550	218216	180974	17458.9	16956.1	13493.3	332526	321503	332047	-	-	-
WapTKC089529	1-[4-[(2S,3R,4S,5S,6R)-3,4,5-Trihydroxy-6-[[(2S,3R,4S,5R)-3,4,5-Trihydroxyoxan-2-Yl]Oxymethyl]Oxan-2-Yl]Oxyphenyl]Ethanone	0	Terpenoids	Sesquiterpenoids	C19H26O11	431.15	137.06	430.147	[M+H]+	2	-	-	107100	85668.2	61225.7	222659	374031	414784	302746	290533	362703	320729	290612	319519	399878	569820	516074	260140	299977	410208	-	-	-
Rfn07523	5-methoxy-2-(3-methylbut-2-enyl)benzene-1,3-diol	0	Others	Others	C12H16O3	209.12	153.06	208.11	[M+H]+	3	-	-	995184	1.21203e+06	1.20964e+06	254261	351353	515326	191006	248431	169481	436273	704620	455010	330106	210689	214413	493854	597892	461683	-	-	-
Walp007188	2-Aminooctadecane-1,5,7,17-tetraol	0	Lipids	Sphingolipids	C18H39NO4	334.3	88.08	333.288	[M+H]+	1	-	-	50186.1	82774.7	66385.1	66169.9	74279.5	50787.8	55174.3	54859.8	34495.3	54266.1	53601.3	36031.6	73925.4	55106.7	37464	67077.2	64721.1	54070.3	-	-	-
MWStz478	Moscatin	0	Quinones	PhenAnthraquinones	C15H12O3	241.09	226.06	240.079	[M+H]+	1	108335-06-4	-	1.9386e+07	2.57665e+07	2.27806e+07	7.07955e+06	8.6762e+06	1.32968e+07	5.71512e+06	8.04857e+06	7.50967e+06	1.48445e+07	2.162e+07	1.51873e+07	9.71212e+06	8.67383e+06	7.5887e+06	1.62634e+07	1.63059e+07	1.77296e+07	-	-	-
MWSHC2083	1,6-Dihydroxy-4(14)-eudesmene	0	Terpenoids	Sesquiterpenoids	C15H26O2	239.2	105.07	238.193	[M+H]+	3	70389-88-7	-	96429.6	82102	102938	62612.1	106299	99750.1	68020.5	72681.2	92655.8	98968.7	67036.8	91398.6	61774.2	62806.3	98680.7	59538.9	125472	87677.1	-	-	-
pmd0132	LysoPC 16:0(2n isomer)*	0	Lipids	LPC	C24H50NO7P	496.34	184.07	495.332	[M+H]+	1	-	-	2.86318e+07	2.77387e+07	2.52157e+07	1.82709e+07	1.73994e+07	1.58831e+07	1.95799e+07	2.6424e+07	2.06436e+07	1.81965e+07	2.08285e+07	2.06391e+07	1.1743e+07	1.46731e+07	1.21723e+07	2.23426e+07	2.20521e+07	2.33001e+07	-	-	-
MWStz661	Neocnidilide*	0	Others	Lactones	C12H18O2	195.14	79.05	194.131	[M+H]+	2	4567-33-3	C17002	130548	118773	75339.5	77116.1	60656.3	65501.9	49301.1	49774	37752.8	44797.2	52979.7	51841.3	48317.3	48145.8	22671.4	67246.2	76610.1	66004.6	-	C17002	-
Rfp109585	cis-N-p-coumaroyltyramine	0	Alkaloids	Phenolamine	C17H17N1O3	284.13	147.05	283.121	[M+H]+	1	-	-	2.52666e+06	2.66744e+06	2.64822e+06	864510	970556	897171	620015	756245	749869	678316	660336	678549	225013	311149	216946	1.077e+06	1.29531e+06	1.20071e+06	-	-	-
Lmhp009526	2-α-Linolenoyl-glycerol-1-O-glucoside*	0	Lipids	Glycerol ester	C27H46O9	515.32	261.22	514.314	[M+H]+	1	-	-	114137	56252.3	56784.6	44270.1	25804.6	33091.5	47829.3	70753.6	54306.9	30228.3	23269.6	27863.6	26623.3	33439	38547.8	48280.2	52454.8	79500.6	-	-	-
WapTKC019232	Mudanpioside G	0	Terpenoids	Monoterpenoids	C16H24O8	345.15	183.1	344.147	[M+H]+	2	231280-70-9	-	588474	565508	384505	215538	241772	241480	409160	472275	309771	493640	320457	346009	231534	242830	209417	326769	406076	367476	-	-	-
HJAP135	Pinocembrin-7-O-(6''-O-malonyl)glucoside	0	Flavonoids	Flavanones	C24H24O12	505.12	257.08	504.127	[M+H]+	3	-	-	3.2948e+06	2.90757e+06	3.05979e+06	1.31356e+06	1.34817e+06	1.32843e+06	619071	675781	697669	888301	991161	932066	134309	163665	155371	1.48663e+06	1.50094e+06	1.4023e+06	-	-	-
Zmmp000606	4-hydroxy-L-Isoleucine	0	Amino acids and derivatives	Amino acids and derivatives	C6H13NO3	148.1	84.08	147.089	[M+H]+	3	1219387-79-7	-	5.73726e+07	5.64993e+07	5.77251e+07	4.72776e+07	5.08116e+07	4.76537e+07	3.7617e+07	3.77445e+07	3.31175e+07	2.78686e+07	3.26748e+07	3.06091e+07	4.77501e+07	4.4581e+07	4.76034e+07	4.40732e+07	4.48651e+07	4.08793e+07	-	-	-
MWS5173	Isocytosine	0	Nucleotides and derivatives	Nucleotides and derivatives	C4H5N3O	112.05	70.03	111.043	[M+H]+	3	108-53-2	-	249223	86959.2	309060	107166	86392.2	113540	72519.7	123059	75845.4	104932	74432.7	149032	60946.2	52156.2	54017.6	68477.4	109917	74356.7	-	-	-
Lahp004712	Rhamnosyl-Rhamnazin-3-O-β-D-glucoside	0	Flavonoids	Flavonols	C29H34O16	639.19	331.08	638.185	[M+H]+	1	-	-	2.01547e+06	2.08282e+06	1.87053e+06	3.24427e+06	3.4898e+06	3.72966e+06	6.729e+06	6.1366e+06	6.14286e+06	4.69144e+06	5.66231e+06	5.45445e+06	5.14814e+06	5.6708e+06	4.87763e+06	4.04138e+06	4.45163e+06	4.32348e+06	-	-	-
pmp001251	LysoPC 18:2(2n isomer)*	0	Lipids	LPC	C26H50NO7P	520.34	184.07	519.332	[M+H]+	1	-	-	544855	543100	426264	267591	298342	293823	164718	178148	170513	120536	139687	124953	266253	271404	258816	306453	380816	295705	-	-	-
MWSmce698	2',4'-Dimethylacetophenone	0	Others	Ketone compounds	C10H12O	149.1	65.04	148.089	[M+H]+	3	89-74-7	-	901606	734996	801793	700355	592978	609911	409878	559662	437943	376167	542570	518388	459833	412398	455549	230924	418878	274825	-	-	-
Wccp001401	4-[2-formyl-5-(hydroxymethyl)pyrrol-1-yl]butanoic acid	0	Alkaloids	Alkaloids	C10H13NO4	212.09	194.08	211.084	[M+H]+	1	-	-	78317	72239.8	57896.8	32496.4	74757.2	55143.2	45991.1	57243	72246.7	58333.4	65934.9	37190.6	54213.4	60299.7	57734.4	73947.7	51736.5	56351.4	-	-	-
MWS2673	5,6-DHET	0	Lipids	Free fatty acids	C20H34O4	339.25	121.1	338.246	[M+H]+	3	213382-49-1	C14772	550499	660506	622070	404678	405516	343678	102665	110839	147630	185983	249681	157908	160241	169917	127245	502066	468243	512861	ko00590,ko01100	C14772	-
WapTKC189738	4,7-dimethyl-1a,2,3,4a,5,6,7a,7b-octahydro-1H-cyclopropa[h]azulene-4,7-diol*	0	Terpenoids	Sesquiterpenoids	C13H22O2	211.17	109.1	210.162	[M+H]+	2	-	-	126077	83881.4	39947.7	35868.1	85033	52813.3	31774.2	42308.2	47169.9	76770.8	60071.9	56739.3	39040.1	26052.1	38008.7	26821.9	34192.4	36345	-	-	-
Walp007192	2-aminodocoSane-1,6,19,20,21-pentaol	0	Lipids	Sphingolipids	C22H47NO5	406.35	300.29	405.345	[M+H]+	1	-	-	1.76916e+06	1.93198e+06	1.96301e+06	1.44727e+06	1.60084e+06	389103	1.39594e+06	1.26225e+06	363376	1.41465e+06	1.73456e+06	420680	2.17955e+06	1.96152e+06	470584	2.78135e+06	2.57305e+06	2.72948e+06	-	-	-
Zkep004521	Alizarin 2-methyl ether*	0	Quinones	Anthraquinone	C15H10O4	255.07	240.04	254.058	[M+H]+	3	6003-11-8	C10291	313154	423656	409750	135111	221177	222541	116355	175256	115239	283291	402964	274593	254117	159398	197280	366090	343049	391175	-	C10291	-
PDP179159	1,7-Dihydroxy-5-methoxy-9,10-dihydrophenanthrene	0	Quinones	PhenAnthraquinones	C15H14O3	243.1	165.07	242.094	[M+H]+	3	133145-20-7	-	94151.8	118347	129238	65352.5	91647.9	109044	71605.5	54242.2	67363.8	60234.7	120354	101670	66262	53812.4	41387.7	109158	81284.6	107204	-	-	-
Walp007738	14-Amino-15-hydroxy-11-methylpentadecanoic acid	0	Lipids	Sphingolipids	C16H33NO3	288.25	88.08	287.246	[M+H]+	1	-	-	56896.5	44718.5	33969.9	23192.2	30834.5	26680.8	38089.2	22166.8	17110.4	24886.4	39736.2	30978.5	45152	30756.4	22917	37978	43355.3	47683.8	-	-	-
MWS201419	Lys-Gly	0	Amino acids and derivatives	Amino acids and derivatives	C8H17N3O3	204.13	84.08	203.127	[M+H]+	3	7563-03-3	-	8.62368e+06	8.16478e+06	6.55887e+06	7.27572e+06	6.87339e+06	7.13253e+06	7.28938e+06	5.77931e+06	6.64455e+06	7.04611e+06	7.89993e+06	6.68271e+06	7.52993e+06	7.58196e+06	7.31478e+06	7.97612e+06	8.04991e+06	7.98865e+06	-	-	-
pme0124	L-Glycyl-L-proline	0	Amino acids and derivatives	Amino acids and derivatives	C7H12N2O3	173.09	116.07	172.085	[M+H]+	3	704-15-4	-	362726	182943	216272	186562	148667	117054	211963	259370	169943	108044	176726	150897	137514	128498	120529	172576	196220	128407	-	-	-
Yynp000008	10α-Hydroxycadin-4-en-15-al	0	Terpenoids	Sesquiterpenoids	C15H24O2	237.18	161.13	236.178	[M+H]+	3	398147-37-0	-	420776	353914	367173	628226	630032	595044	579905	506896	524581	433366	462712	497632	558347	568508	631032	477416	527469	573301	-	-	-
HX1226	4-Hydroxy-β-bulnesene	0	Others	Others	C15H24O	221.19	107.09	220.183	[M+H]+	1	-	-	346792	466396	340407	1.23705e+06	1.14965e+06	1.19033e+06	928557	1.08279e+06	1.05438e+06	1.22253e+06	1.37474e+06	1.31634e+06	1.20217e+06	1.32768e+06	1.325e+06	898761	900388	959134	-	-	-
Wdtp007414	Ethyl (+)-(S)-2-hydroxy-3-[(4'-hydroxybenzyl) sulfide]propionate	0	Others	Others	C12H16O4S	257.08	225.05	256.077	[M+H]+	3	-	-	319075	389683	357004	108776	198714	199866	88330.6	127228	86266.3	246413	323784	291444	206602	136418	159442	341622	280879	239802	-	-	-
Lsj214144	10-hydroxy-2-hydroxymethyl-1,4-anthraquinone*	0	Quinones	Anthraquinone	C15H10O4	255.06	240.04	254.058	[M+H]+	3	-	-	235053	213033	311967	39767.5	96890.7	79196.7	33180.6	41581.5	41093.9	96176.9	120552	117513	50333.6	50372.9	48728.3	143205	85372.7	84287.4	-	-	-
Lmbp005578	4-Hydroxy-8-sphingenine	0	Lipids	Sphingolipids	C18H37NO3	316.28	60.04	315.277	[M+H]+	1	-	-	2.77711e+06	2.88071e+06	2.09251e+06	876094	783201	896219	2.01779e+06	2.17415e+06	2.1525e+06	1.61087e+06	1.74362e+06	1.53951e+06	1.22826e+06	901274	1.27715e+06	1.97205e+06	1.89433e+06	1.91584e+06	-	-	-
PDP104503	2,3,4,5-tetrahydroxy-6-oxohexyl 4-hydroxybenzoate	0	Phenolic acids	Phenolic acids	C13H16O8	301.09	121.03	300.084	[M+H]+	3	-	-	179587	178805	150978	309504	112668	95404.2	386035	337599	302163	286738	303184	386335	371466	207723	130085	139263	312930	143326	-	-	-
Wagp005869	3-Hydroxy-beta-ionol 3-(6''-Malonyl)Glucoside	0	Others	Others	C22H34O10	459.22	211.17	458.215	[M+H]+	2	-	-	854416	765332	555185	454070	558330	341047	669948	619026	635760	456516	550143	560849	581888	610979	616755	614126	719533	632724	-	-	-
Lcsp003090	Ser-Leu-Leu*	0	Amino acids and derivatives	Amino acids and derivatives	C15H29N3O5	332.22	173.13	331.211	[M+H]+	3	10329-74-5	-	58605.9	80837.6	35517.9	106139	134411	69625.5	74910.5	52423.6	60621.8	110358	125208	59524.1	107239	46623.9	94266.3	65734.5	80185.1	74857.4	-	-	-
PDP136747	3-amino-4-methyloxetan-2-one*	0	Alkaloids	Alkaloids	C4H7NO2	102.06	56.05	101.048	[M+H]+	3	-	-	1.91572e+06	1.9206e+06	2.00605e+06	1.53155e+06	1.47953e+06	1.46046e+06	1.31153e+06	1.38001e+06	1.30435e+06	1.12169e+06	1.0681e+06	1.02544e+06	1.39439e+06	1.39633e+06	1.28246e+06	1.3929e+06	1.46044e+06	1.41409e+06	-	-	-
MWS3020	N-Acetylcadaverine	0	Alkaloids	Alkaloids	C7H16N2O	145.13	86.1	144.126	[M+H]+	3	32343-73-0	-	584215	732130	653131	418903	466212	580304	399010	491013	502595	503727	409534	534238	515354	585289	567267	455803	567751	572911	-	-	-
pme2617	L-Methionine S-oxide	0	Amino acids and derivatives	Amino acids and derivatives	C5H11NO3S	166.05	102.06	165.046	[M+H]+	3	3226-65-1	C02989	4.22102e+06	3.53536e+06	3.36224e+06	3.34814e+06	2.86637e+06	3.45546e+06	3.01514e+06	3.46383e+06	3.20024e+06	3.06357e+06	2.89963e+06	2.91664e+06	3.33275e+06	3.44977e+06	3.23913e+06	2.98627e+06	3.46108e+06	3.26583e+06	ko00270,ko01100	C02989	-
WapTKC001585	14,15-Dihydroxy-1,2-Dinor-6,10-Phytadien-3-one	0	Terpenoids	Ditepenoids	C18H32O3	297.24	121.1	296.235	[M+H]+	1	81373-96-8	-	34735	43165.7	29330.8	125255	161243	122887	96610.2	98301.8	82710.2	59463.3	77342.6	60909.9	77726.3	91085.1	88635.2	66971.4	62406	67970.1	-	-	-
MWS201415	Pro-Asp	0	Amino acids and derivatives	Amino acids and derivatives	C9H14N2O5	231.1	70.07	230.09	[M+H]+	3	85227-98-1	-	315684	244857	242656	181661	180492	191609	225110	199727	241236	160493	243103	208652	169048	159055	159915	236688	245103	185165	-	-	-
pme1936	Creatinine	0	Alkaloids	Alkaloids	C4H7N3O	114.07	86.07	113.059	[M+H]+	3	60-27-5	C00791	618163	521839	460700	368615	312565	293867	318648	270282	258538	337626	279348	305856	73327.9	109171	88877.3	302165	305204	303647	ko00330,ko01100	C00791	-
pmb0492	N',N'',N'''-p-Coumaroyl-cinnamoyl-caffeoyl spermidine	0	Alkaloids	Phenolamine	C34H37N3O6	584.28	325	583.268	[M+H]+	3	-	-	574593	666551	498995	246755	270149	230374	193360	241295	268060	226940	171453	188477	193357	382737	142131	214670	373471	153401	-	-	-
Lmqp000329	Aminoimidazole ribotide	0	Nucleotides and derivatives	Nucleotides and derivatives	C8H14N3O7P	296.07	104.11	295.057	[M+H]+	1	25635-88-5	C03373	1.61322e+06	1.5287e+06	1.69818e+06	1.14097e+06	1.35007e+06	1.148e+06	606834	448625	498451	343226	497897	589619	1.07261e+06	987894	990801	1.34667e+06	1.14411e+06	1.16799e+06	ko00230,ko00730,ko00860,ko01100,ko01110,ko01240	C03373	-
Lmhp001461	L-Prolyl-L-Leucine	0	Amino acids and derivatives	Amino acids and derivatives	C11H20N2O3	229.15	70.07	228.147	[M+H]+	1	52899-07-7	-	1.12302e+06	1.13264e+06	1.18667e+06	939755	896962	874683	682982	669956	721694	610424	615876	695107	996332	951228	823454	854279	950750	895176	-	-	-
Zmzp000616	4-Hydroxyaniline	0	Alkaloids	Alkaloids	C6H7NO	110.06	93.06	109.053	[M+H]+	2	123-30-8	C02372	251725	51393.4	192115	68957.8	23441.3	52951.9	84347.8	134367	92859.8	88083.1	90292.5	73693.2	74999.5	103041	54797.9	93112.5	74194.8	58507.7	-	C02372	-
Zmmp000635	4,5-Dehydro-L-leucine*	0	Amino acids and derivatives	Amino acids and derivatives	C6H11NO2	130.09	84.08	129.079	[M+H]+	2	-	-	2.12818e+07	2.25777e+07	2.0935e+07	1.051e+07	1.07385e+07	9.93938e+06	8.68802e+06	7.04945e+06	7.92472e+06	6.93609e+06	7.20736e+06	6.81437e+06	1.16951e+07	1.10762e+07	1.03913e+07	1.20239e+07	1.28715e+07	1.16767e+07	-	-	-
Salp000527	(2R,5S)-2,5-Diaminohexanoate	0	Amino acids and derivatives	Amino acids and derivatives	C6H14N2O2	147.11	84.04	146.106	[M+H]+	3	-	C05161	2.24511e+07	1.92013e+07	2.34511e+07	7.24762e+06	7.00735e+06	6.47489e+06	8.33676e+06	7.31726e+06	7.54059e+06	4.98776e+06	6.40476e+06	6.15972e+06	2.04078e+06	1.73357e+06	1.71784e+06	8.40345e+06	9.31353e+06	7.76214e+06	ko00310,ko00470,ko01100	C05161	-
Rp003307	Isoglutamine*	0	Amino acids and derivatives	Amino acids and derivatives	C5H10N2O3	147.08	84.05	146.069	[M+H]+	3	636-65-7	C16673	2.14652e+07	1.9373e+07	2.36838e+07	6.33357e+06	6.88486e+06	6.3383e+06	8.56758e+06	7.63877e+06	7.40736e+06	5.31841e+06	6.0703e+06	6.14173e+06	2.00952e+06	1.58832e+06	1.92271e+06	8.53426e+06	9.04838e+06	7.7689e+06	ko00340	C16673	-
PD0165609	Jaceidin 7-neohesperidoside	0	Flavonoids	Flavonols	C30H36O17	669.2	523.15	668.195	[M+H]+	2	-	-	183370	150462	108293	226152	256428	166767	205246	180466	207497	251056	294310	181456	247456	222733	207069	309503	226310	279282	-	-	-
WapTKC038162	2-methyl-10-methylidene-6-[[(2S,3S,4R,5R,6S)-3,4,5-trihydroxy-6-(hydroxymethyl)oxan-2-yl]oxymethyl]-12-oxatricyclo[7.3.1.01,5]trideca-2,5-diene-4,11-dione*	0	Terpenoids	Sesquiterpenoids	C21H26O9	423.17	261.11	422.158	[M+H]+	1	116359-92-3	-	282987	330446	325665	202844	167255	175657	182773	205920	185314	214961	241346	336846	168032	220034	136898	255114	269804	296347	-	-	-
Lcfp041728	5-Methylcoumarin-4-cellobioside	0	Lignans and Coumarins	Coumarins	C22H28O13	501.16	177.06	500.153	[M+H]+	2	109974-31-4	-	582049	602094	536621	354249	176125	325611	292978	289891	320021	479831	410691	393342	299627	157299	303334	361200	431521	352353	-	-	-
pmb0530	NAD+	0	Nucleotides and derivatives	Nucleotides and derivatives	C21H27N7O14P2	664.12	136.06	663.109	[M+H]+	1	53-84-9	C00003	871513	701813	519277	452694	576610	426871	444204	278127	402330	309505	512533	336178	196952	184072	214207	371686	360498	259621	ko00190,ko00730,ko00760,ko01100,ko01240,ko04148	C00003	-
Rlp03505	Aloesol 7-glucoside	0	Others	Chromone	C19H24O9	397.15	235.1	396.142	[M+H]+	3	-	-	478203	206161	170337	261783	258761	211573	110469	107648	124928	131140	225625	128166	59508	110330	65971.4	77942.1	134917	76881.8	-	-	-
Wcfp001744	N-Methyl-2-pyrrolidinone	0	Others	Others	C5H9NO	100.08	58.03	99.0684	[M+H]+	3	872-50-4	C11118	296887	411299	246882	337166	301361	275089	287895	276009	329570	231728	259380	344641	253361	284337	266612	132216	160640	117803	-	C11118	-
mws0260	L-Arginine	0	Amino acids and derivatives	Amino acids and derivatives	C6H14N4O2	175.12	116.07	174.112	[M+H]+	1	74-79-3	C00062	2.35122e+08	2.39945e+08	2.14745e+08	8.22158e+07	8.16714e+07	7.8252e+07	5.95743e+07	5.82284e+07	5.88553e+07	4.1605e+07	4.97708e+07	5.18774e+07	4.04771e+06	4.14356e+06	4.40547e+06	9.82412e+07	1.0231e+08	1.07109e+08	ko00220,ko00261,ko00330,ko00470,ko00970,ko01100,ko01110,ko01230,ko02010,ko04148	C00062	-
pme0008	L-Citrulline	0	Amino acids and derivatives	Amino acids and derivatives	C6H13N3O3	176.1	113.07	175.096	[M+H]+	3	372-75-8	C00327	3.69491e+06	3.06842e+06	3.33422e+06	1.07608e+06	625300	999025	907080	719968	721997	583903	637645	721190	107564	120232	85106.2	1.34962e+06	1.54639e+06	1.30379e+06	ko00220,ko01100,ko01110,ko01230	C00327	-
MWS201471	Lys-Tyr	0	Amino acids and derivatives	Amino acids and derivatives	C15H23N3O4	310.18	84.08	309.169	[M+H]+	3	35978-98-4	-	1.51822e+06	867151	1.25846e+06	737493	699305	764307	927338	795872	913215	586669	821798	903235	759725	691487	737014	736713	909295	779107	-	-	-
Zmbp000490	Valerine	0	Alkaloids	Alkaloids	C8H15NO2	158.12	112.08	157.11	[M+H]+	3	-	-	7.64979e+06	4.76414e+06	5.23681e+06	3.95052e+06	3.68235e+06	3.72911e+06	3.77816e+06	3.64973e+06	3.23e+06	4.1016e+06	5.08015e+06	4.40893e+06	1.69251e+06	1.67587e+06	1.64762e+06	3.12739e+06	4.76921e+06	3.57357e+06	-	-	-
Rfn0518	2-Methylpyrrolidine-2-carboxylic acid*	0	Alkaloids	Alkaloids	C6H11NO2	130.09	84.09	129.079	[M+H]+	2	16277-06-8	-	2.1173e+07	2.21183e+07	2.06278e+07	1.07267e+07	9.95713e+06	9.5827e+06	7.60308e+06	7.28343e+06	7.16149e+06	6.89634e+06	7.11955e+06	7.09195e+06	1.10204e+07	1.14413e+07	1.14478e+07	1.18325e+07	1.28001e+07	1.1772e+07	-	-	-
Zmsp000608	3-epi-fagomine	0	Alkaloids	Piperidine alkaloids	C6H13NO3	148.1	86.06	147.089	[M+H]+	3	-	-	116193	84266.9	79209.8	68322.9	53613.2	55680	49598.9	52361.9	52300.7	34900.6	47692.3	49574.4	50801	31532.5	47717	54818.4	69814.5	63069.3	-	-	-
MWSmce471	Fagomine	0	Alkaloids	Piperidine alkaloids	C6H13NO3	148.1	86.06	147.089	[M+H]+	3	53185-12-9	C10144	113049	109218	74215.1	77870.3	52998.8	44711.2	71291.6	57222.9	50176.2	46878.9	64870.5	73519.7	42820.2	40953.1	20820.4	61651.9	61705.5	70977.2	-	C10144	-
MW0150322	Gly-Asp-Asp	0	Amino acids and derivatives	Amino acids and derivatives	C10H15N3O8	306.1	144.05	305.086	[M+H]+	3	-	-	5.3191e+06	3.04652e+06	3.11725e+06	1.24726e+06	968969	2.24156e+06	1.87497e+06	1.76303e+06	1.56898e+06	2.49336e+06	2.92114e+06	2.39786e+06	1.46339e+06	1.08901e+06	1.70599e+06	3.37445e+06	2.42372e+06	2.6493e+06	-	-	-
Salp000862	3-(Dimethylaminomethyl)-4-hydroxy acetanilide	0	Alkaloids	Alkaloids	C11H16N2O2	209.13	150.06	208.121	[M+H]+	3	13886-04-9	-	132428	164471	120581	305709	282550	264376	255324	285298	278988	236116	195629	254429	344907	328975	324270	295139	231544	281826	-	-	-
Rlp04931	2-[(4-hydroxy-6-methoxyphenanthren-3-yl)oxy]-6-(hydroxymethyl)oxane-3,4,5-triol	0	Others	Others	C21H22O8	403.14	241.09	402.132	[M+H]+	1	-	-	1.94433e+06	2.85134e+06	1.46481e+06	1.73135e+06	1.71449e+06	713524	625565	748049	689777	1.22336e+06	1.75258e+06	1.50416e+06	184551	163991	126571	742997	1.36465e+06	808816	-	-	-
Wasdp02452	7-(1-hydroxyethyl)chromen-2-one*	0	Lignans and Coumarins	Coumarins	C11H10O3	191.07	147.04	190.063	[M+H]+	1	-	-	689425	536850	487536	676029	1.22609e+06	1.27862e+06	811793	906042	899610	619753	829332	721036	601833	1.02849e+06	557829	450710	808828	558642	-	-	-
pme1474	5'-Methylthioadenosine	0	Nucleotides and derivatives	Nucleotides and derivatives	C11H15N5O3S	298.1	136.06	297.09	[M+H]+	1	2457-80-9	C00170	6.22798e+07	4.40626e+07	3.83226e+07	4.33296e+07	6.606e+07	4.55571e+07	3.2292e+07	3.423e+07	3.54909e+07	2.51117e+07	3.90332e+07	3.33174e+07	3.27052e+07	6.01148e+07	4.74464e+07	3.81344e+07	4.12731e+07	2.91851e+07	ko00270,ko00908,ko01100	C00170	-
Lhjp111622	Dehydroxysecologanic acid	0	Terpenoids	Monoterpenoids	C16H22O9	359.13	151.04	358.126	[M+H]+	2	-	-	77114.6	46255.8	103014	68420.8	142576	176977	111472	120391	121100	84239	70655.1	75138.2	94978.4	102867	95073.8	120467	77253.6	141169	-	-	-
PDP123169	2-(4-Hydroxy-6-methoxyphenanthren-3-yl)oxy-6-(hydroxymethyl)oxane-3,4,5-triol	0	Others	Others	C21H22O8	403.14	241.09	402.132	[M+H]+	3	-	-	1.96537e+06	1.7804e+06	1.67093e+06	578170	702036	600922	248891	199102	228798	343536	362959	324219	46632.5	26030.6	46414.1	561156	698677	555665	-	-	-
MWSslk071	Valpromide	0	Alkaloids	Alkaloids	C8H17NO	144.14	57.07	143.131	[M+H]+	3	2430-27-5	-	57828.2	44961.7	40367.4	42531.6	36147.7	37883.3	42052.6	18861	32452.9	31472.6	32764.2	42804.6	20093.3	22044.2	32524.5	14532.3	15655.4	8597.97	-	-	-
mws1565	Geniposide	0	Terpenoids	Monoterpenoids	C17H24O10	389.14	209.08	388.137	[M+H]+	3	24512-63-8	C09781	476980	486563	436551	477268	238890	217280	379368	344384	261388	481298	375025	284114	192833	186074	236191	255561	346770	150646	-	C09781	-
pmp000737	Magnocurarine	0	Alkaloids	Isoquinoline alkaloids	C19H24NO3+	314.18	269.12	314.175	[M]+	3	6801-40-7	C16991	27319.9	28985.5	39292.3	41300.9	65800.6	91464.2	47064.3	46033.2	50717.6	70602.4	52776.2	64184.4	42306.5	37894.4	43491.6	41889.6	49009.4	45130.3	-	C16991	-
Zbqp002641	4-amino-2-(1-amino-3-(((S)-1-carboxyethyl)amino)-3-oxopropyl)-6-methyl-3-oxoheptanoic acid	0	Amino acids and derivatives	Amino acids and derivatives	C14H25N3O6	332.18	86.1	331.174	[M+H]+	3	-	-	66630.1	88739.5	108741	175172	193091	99950.3	104236	74937.8	68382.5	60792.4	117188	161211	170902	167535	106486	105945	151532	170589	-	-	-
Zbqp003540	L-isoleucyl-L-aspartyl-L-isoleucine	0	Amino acids and derivatives	Amino acids and derivatives	C16H29N3O6	360.21	198.11	359.206	[M+H]+	3	-	-	57510.5	62635.3	74775.4	104762	137809	224220	130630	148349	160130	194462	142257	195054	185600	152941	173188	109573	166681	96948	-	-	-
MWSmce016	Nicotinic Acid Methyl Ester(Methyl Nicotinate)	0	Alkaloids	Pyridine alkaloids	C7H7NO2	138.05	78.03	137.048	[M+H]+	3	93-60-7	-	60520.9	55245.1	37576.5	130880	259481	192310	94243	114090	102246	112967	128764	161457	85285.4	134312	117522	123765	65318.4	130175	-	-	-
Lmyp003934	6-Pentadecylsalicylic acid	0	Phenolic acids	Phenolic acids	C22H36O3	349.27	123.08	348.266	[M+H]+	3	16611-84-0	C10759	206849	224545	191238	81444.6	86142.4	102019	39370.4	49556.2	45019.5	36423.3	42063.1	43828.2	76933.4	102540	85184.1	147519	142522	141727	-	C10759	-
Lmqp002784	Salicylamide	0	Alkaloids	Alkaloids	C7H7NO2	138.06	77.04	137.048	[M+H]+	2	65-45-2	-	1.29713e+06	1.46213e+06	1.28455e+06	1.05182e+06	964709	917124	471279	507112	477259	486101	421145	521660	486215	356783	369757	701791	730805	523846	-	-	-
WapTKC002543	Ent-14,15-Dinor-3-Cleroden-3-one*	0	Terpenoids	Ditepenoids	C18H30O	263.24	81.07	262.23	[M+H]+	1	130466-21-6	-	879738	762282	638071	444192	349678	536083	334173	413585	391311	445374	573867	385334	265236	305172	337487	594096	693832	696631	-	-	-
Lhkp101315	(3aS,5R,7aR)-4,4-Dimethyl-7a-hydroxymethyl-5-hydroxy-2,3,3a,4,5,7a-hexahydrobenzo[b]furan-2-one	0	Others	Others	C11H16O4	213.11	149.09	212.105	[M+H]+	1	-	-	34580.8	54042.9	68057.4	91618.8	162207	215139	116217	117278	83341.6	146480	78810.7	132471	161244	169945	159677	113838	123487	158061	-	-	-
WaJp002432	3-Demethoxyl-2-Demethyldemecolcine Glucoside	0	Alkaloids	Alkaloids	C25H31NO9	490.21	328.15	489.2	[M+H]+	3	-	-	341552	429680	191862	168440	113042	132954	152899	129308	145227	136463	255732	114028	107102	100856	140102	113664	176191	138945	-	-	-
Wayp001024	N-(1-Deoxy-1-fructosyl)Valine	0	Amino acids and derivatives	Amino acids and derivatives	C11H21NO7	280.14	216.12	279.132	[M+H]+	3	-	-	18032.4	15574	16881.1	39360	28888.3	25695.2	32668	16516.1	20020.5	36597.9	32967.2	26698.6	35602.7	33931.4	32466.3	39059.3	22717.5	25991.9	-	-	-
PDP244504	ar-acalyphidone	0	Alkaloids	Alkaloids	C13H19NO8	318.12	156.06	317.111	[M+H]+	2	-	-	144915	176868	93899.1	208613	223045	192606	248212	186697	143344	93991.8	145053	321044	116890	209701	144208	205074	281650	267817	-	-	-
Walbp01542	N-Glucosylnicotinate*	0	Alkaloids	Pyridine alkaloids	C12H16NO7+	286.09	124.04	286.093	[M]+	2	-	C03003	159026	155092	172139	94738.1	105505	125243	113707	74962.6	86380.9	93359.2	112507	145799	33564.8	60959	35835.5	110460	99785.8	86145.6	-	C03003	-
PD0016633	Buchananine	0	Alkaloids	Alkaloids	C12H15NO7	286.09	124.04	285.085	[M+H]+	2	-	-	152660	141618	145303	82361.9	84045.3	103438	61733.9	89438.7	73387.5	79193.1	126579	134301	67515.4	39725.2	69761.2	123459	117498	102924	-	-	-
MWSslk064	Dimethyl 4-Hydroxyisophthalate	0	Phenolic acids	Phenolic acids	C10H10O5	211.06	147.01	210.053	[M+H]+	3	5985-24-0	-	47631.5	30725.5	48048.1	34643	33609	40650.4	39184.4	41750.5	36062.8	39288.5	45134.6	40398.7	44731.6	35614.2	38238.7	36735.3	34605.1	27879.2	-	-	-
Lcfp013472	6-(hydroxymethyl)pyridin-3-ol	0	Alkaloids	Pyridine alkaloids	C6H7NO2	126.06	80.05	125.048	[M+H]+	1	40222-77-3	-	155861	123481	163963	96306.1	111213	80079.3	87768	99457.6	89672.6	76407.7	107672	117211	35373.8	46767.1	27872.4	73200.7	77070.2	85261	-	-	-
MWS04447	Homoproline	0	Amino acids and derivatives	Amino acids and derivatives	C6H11NO2	130.09	70.07	129.079	[M+H]+	3	535-75-1	-	7.49188e+06	7.61879e+06	6.26808e+06	2.21552e+06	2.19579e+06	2.30291e+06	1.90006e+06	2.0316e+06	1.88246e+06	1504820	1.48217e+06	1.5856e+06	840641	893593	711217	3.34096e+06	3.36316e+06	3.46426e+06	-	-	-
PDP115321	3-Pyrrolidine carboxylic acid*	0	Amino acids and derivatives	Amino acids and derivatives	C5H9NO2	116.07	70.07	115.063	[M+H]+	1	-	-	2.61756e+07	2.60569e+07	2.40775e+07	1.80605e+07	1.74126e+07	1.68568e+07	1.56287e+07	1.62737e+07	1.70974e+07	1.44173e+07	1.44076e+07	1.51241e+07	9.00349e+06	8.92678e+06	8.07221e+06	1.67694e+07	1.88713e+07	1.81123e+07	-	-	-
pmb0864	LysoPE 14:0*	0	Lipids	LPE	C19H40NO7P	426.26	285.24	425.254	[M+H]+	3	-	-	81405.6	69605	40256.4	33318.8	37817.1	29590.4	29935.7	40665.5	32506	28983.3	30302.8	22204.1	22599.7	13014.1	20327.1	40105.9	36994.6	30393.5	-	-	-
pmb2319	LysoPC 15:0*	0	Lipids	LPC	C23H48NO7P	482.32	184.07	481.317	[M+H]+	1	108273-89-8	-	214956	214131	186867	121977	128917	108838	49777.2	59335.8	48329.9	55185.6	58493	41674.6	66573	66576	62604	89547.7	127129	119313	-	-	-
Lmhp010515	LysoPC 17:0(2n isomer)*	0	Lipids	LPC	C25H52NO7P	510.36	184.07	509.348	[M+H]+	2	-	-	264865	255931	175982	136430	135912	135245	111049	118670	92992.5	91111.6	128273	106997	160861	146017	144427	166932	167695	182603	-	-	-
PD0899195	(2E,4E,6E)-dodeca-2,4,6-trienoic acid	0	Lipids	Free fatty acids	C12H18O2	195.14	81.07	194.131	[M+H]+	3	-	-	80256.9	74493.3	58503.1	41106.3	60218.8	53656.4	49955.5	64041.8	47295.2	54809.6	68416.9	70202.8	48606	56978.8	42325.3	52113.4	83041	53243.6	-	-	-
MWS201439	Phe-His	0	Amino acids and derivatives	Amino acids and derivatives	C15H18N4O3	303.15	156.08	302.138	[M+H]+	3	16874-81-0	-	7234.82	23990.2	19100.9	40041.5	35285.9	22338.5	32554.4	31297.4	31990.4	33958.9	29049.6	40269.3	23493.6	26251	29972.7	26331.4	25389.9	27977.2	-	-	-
MWSmce582	Methyl L-pyroglutamate	0	Amino acids and derivatives	Amino acids and derivatives	C6H9NO3	144.07	84.04	143.058	[M+H]+	3	4931-66-2	-	96900	78657.4	66414.4	44564.5	69918.7	39576.6	55162.5	41217.4	12395.6	51857.6	38650.8	40713.9	48230.3	32478.1	26800.1	38688.1	47164.7	48701.3	-	-	-
WapTKC038188	8-Hydroxy-2-Oxo-1(10),3,11(13)-Guaiatrien-12,6-olide 8-O-β-D-Glucopyranoside*	0	Terpenoids	Sesquiterpenoids	C21H26O9	423.16	261.11	422.158	[M+H]+	1	152243-06-6	-	254632	244471	197635	117757	57503.1	41701.1	74677.8	100050	60228.8	59820.2	141382	91629.4	38017.5	69194.2	47248.9	101211	151327	88558.7	-	-	-
mws0040	Chrysin	0	Flavonoids	Flavones	C15H10O4	255.07	153.02	254.058	[M+H]+	3	480-40-0	C10028	36538.9	41848.2	45853.5	22377	28686.4	52953	14364.3	27795.3	18021.6	21011.4	68335.5	37785	23210.9	31230.2	14168.6	33737	33407.5	58508.1	ko00941	C10028	-
PDP285550	Pyroglutamylleucine*	0	Amino acids and derivatives	Amino acids and derivatives	C11H18N2O4	243.13	86.1	242.127	[M+H]+	3	-	-	99352.8	155261	120255	79265.9	73978.6	89924.7	43826.4	45098	47761.8	105241	97034.8	105685	123604	56363.8	56749.3	97113.6	119546	108345	-	-	-
MWStz333	Isololiolide*	0	Terpenoids	Terpene	C11H16O3	197.12	133.1	196.11	[M+H]+	1	38274-00-9	-	248566	199511	178238	435575	326085	253843	318170	271533	338469	225257	258050	272792	302390	275002	285039	242732	297116	193833	-	-	-
Lcyp000688	Verecundin(Pinocembrin-5-glucoside)	0	Flavonoids	Flavanones	C21H22O9	419.13	257.08	418.126	[M+H]+	3	-	-	203138	186334	145144	47904.2	68916.6	50448.2	38493	31020.7	36402.2	35772	50123	55020.7	14602.1	3450.5	19682.7	85968.6	80794.4	68272.5	-	-	-
Zbsp010319	[6]-Gingerdiol 5-acetate	0	Phenolic acids	Phenolic acids	C19H30O5	339.21	137.06	338.209	[M+H]+	3	143519-16-8	-	442455	414117	361411	233062	208055	241874	79837.1	94698.2	88647.2	88237.1	181396	116984	123874	141758	93678.3	364797	321333	336171	-	-	-
WapTKC124118	Siegesbeckia I	0	Terpenoids	Ditepenoids	C19H28O4	321.2	257.19	320.199	[M+H]+	3	-	-	26636.5	46053.6	41849	22812.6	31237.3	17545.5	18515	28445.9	11097.6	36578.1	58874	16687	35943.8	25880.4	22922.7	61863.2	51301.4	48913.1	-	-	-
MWS1939	Fluoren-9-one	0	Others	Ketone compounds	C13H8O	181.06	152.06	180.058	[M+H]+	3	486-25-9	C06712	32665.2	37510.8	28236	42099.1	37375	45207.5	57436.7	43440.3	41408.9	34205	37283.8	49977.8	39012.9	39139.4	41452.2	28478.1	46507.5	42885.1	ko01100	C06712	-
Safp009309	N-hexanoylsphinganine	0	Lipids	Free fatty acids	C24H49NO3	400.38	338.34	399.371	[M+H]+	1	-	-	18243.6	132344	10904.9	139859	126115	214460	139367	107434	226342	113528	15161.9	319083	30012	158565	350519	151966	159270	113836	-	-	-
Zbzp008644	Eupatorium adenophora B	0	Terpenoids	Sesquiterpenoids	C15H24O2	237.18	121.07	236.177	[M+H]+	1	-	-	26791.8	34945.6	60779.9	118252	94969.7	94265.1	134067	110586	98273	89671.6	91817	122038	89554	103328	92932.2	102202	51361.9	60436.9	-	-	-
MWSHY0054	Eupatorin; 3',5-Dihydroxy-4',6,7-Trimethoxyflavone*	0	Flavonoids	Flavones	C18H16O7	345.1	312.06	344.09	[M+H]+	1	855-96-9	-	5.52336e+06	5.06687e+06	4.02317e+06	7.33724e+06	8.81229e+06	1.12797e+07	8.91713e+06	7.5002e+06	9.76543e+06	1.02046e+07	7.96177e+06	1.08917e+07	8.65503e+06	1.03996e+07	9.27927e+06	1.02573e+07	9.60112e+06	8.71822e+06	-	-	-
PDP131482	2-[(1R)-7-methyl-1,2,3,4,4a,5,6,8a-octahydronaphthalen-1-yl]prop-2-enoic acid	0	Organic acids	Organic acids	C14H20O2	221.16	119.09	220.146	[M+H]+	2	-	-	126990	143687	127421	88801	104694	95707.2	90121.7	94948	63440.4	87609.1	71391.2	52585.6	89241.4	95715.3	79876.5	37582.6	61184.9	73817.3	-	-	-
Lmhp001732	L-Prolyl-L-Phenylalanine	0	Amino acids and derivatives	Amino acids and derivatives	C14H18N2O3	263.14	70.06	262.132	[M+H]+	2	13589-02-1	-	179616	147725	147571	81491.5	113624	143146	130479	124097	67563.2	80034.7	122070	134891	119002	132880	115720	114163	142084	108678	-	-	-
Lacp005908	1-Hydroxy-3-Methoxy-9,10-Anthraquinone	0	Quinones	Anthraquinone	C15H10O4	255.06	181.06	254.057	[M+H]+	3	20733-99-7	-	72446.5	103538	52253.1	23595.8	25131.5	37805.3	9823.26	17488.1	18023.2	31805.2	59100.7	20131.3	20643.3	13444.4	18678	25474.4	37574.2	34770.9	-	-	-
Zbsp009837	[6]-Gingerdiol 3-acetate	0	Phenolic acids	Phenolic acids	C19H30O5	339.22	137.06	338.209	[M+H]+	3	143519-17-9	-	404803	470590	295220	223337	237426	206947	67540.2	79435.7	69872.1	123601	141376	125600	102257	93939.3	92149.1	285748	299662	258462	-	-	-
PDP076367	4-(4-acetylphenyl)butanoic acid	0	Others	Others	C12H14O3	207.1	91.06	206.094	[M+H]+	3	-	-	144432	97087.5	151903	74594.3	64771.2	76831.1	99805	87436.4	70904.9	123479	126762	143443	73728.8	94460.1	106202	84174.6	105375	77009.5	-	-	-
PDP249293	[4-[3,4,5-trihydroxy-6-(hydroxymethyl)oxan-2-yl]oxyphenyl] acetate	0	Others	Others	C14H18O8	315.11	153.05	314.1	[M+H]+	2	-	-	63096.6	50512.1	29631.1	54633.7	190566	215853	108671	163454	123975	49321.4	34897.6	54577.3	40286.6	136572	115770	94528.4	76832.6	68171.1	-	-	-
Labp004808	3-Oxo-Alpha-Ionol diglucoside	0	Terpenoids	Sesquiterpenoids	C25H40O12	533.26	133.1	532.252	[M+H]+	2	-	-	29424.7	23656.7	4731.34	45567.3	44036.6	38578.1	59577.6	44196.9	45010.8	64612.3	53381.4	69084.3	45837.3	64179	49190.3	51813	65649.5	54140.5	-	-	-
Lcsp002545	Val-Asp-Ile	0	Amino acids and derivatives	Amino acids and derivatives	C15H27N3O6	346.2	215.1	345.19	[M+H]+	3	-	-	31962.6	17306.1	35531.4	39991.3	45588.1	42086.1	34407.1	45738.2	52875.1	33912.6	73851.3	45209.8	43790.8	43814.6	35037.9	53168.2	21307	42536.9	-	-	-
Rfn01689	γ-Glu-Ile*	0	Amino acids and derivatives	Amino acids and derivatives	C11H20N2O5	261.14	86.1	260.137	[M+H]+	3	23632-83-9	-	58014.1	75960.2	63674.4	64876.5	110374	89552.1	79665.2	65808.3	100611	111215	92419.7	89550.6	97071.7	105420	70055.1	68213.5	58014.4	100331	-	-	-
WapTKC207821	2-isopropyl-3,4,8,9-tetramethyl-5-methylenecyclodeca-3,8-dien-1-ol*	0	Terpenoids	Sesquiterpenoids	C18H30O	263.24	81.07	262.23	[M+H]+	1	-	-	678501	680361	494459	433746	526869	464987	206154	326645	223059	373561	481463	381117	239149	285469	366345	526516	758780	605038	-	-	-
Wdtp004683	3,4,5-Trihydroxy-6-[1-(4-methoxyphenyl)-4-methylpentan-3-yl]oxyoxane-2-carboxylic acid	0	Phenolic acids	Phenolic acids	C19H28O8	385.18	149.07	384.178	[M+H]+	3	-	-	20611.2	17174.5	20611.5	50630.5	43586.5	46466.3	95817.7	60730.2	68673.1	63707.8	52794.7	72857.4	42393	39045.6	65192.6	57413.6	94088.8	103741	-	-	-
Lazp008807	(25S)-5β-Furost-1β,2β,3β,4β,5β,22α,26-heptaol-26-O-β-D-glucoside	0	Steroids	Steroidal saponins	C33H56O13	661.38	337.27	660.372	[M+H]+	2	-	-	54118.5	48069.7	44544.3	34989.7	49504.1	43874.6	35498.4	43232.9	40803.4	27655	49809.6	37298.6	29459	39790.2	48084.5	50078.3	62813.1	51644.3	-	-	-
MWSmce417	5-O-Methylvisammioside	0	Others	Chromone	C22H28O10	453.17	291.13	452.168	[M+H]+	3	84272-85-5	-	87567.3	41840.5	103561	58844.8	241642	155517	237621	212250	164701	175840	64620	147596	334888	319467	350553	190000	86964.5	231139	-	-	-
pmb0608	Chrysoeriol-7-O-(6''-malonyl)glucoside	0	Flavonoids	Flavones	C25H24O14	549.12	301.07	548.117	[M+H]+	3	-	-	84962	64039.2	45644.9	52549.7	48536.7	55161.9	51879	55171.6	48776.6	48748.1	51037.8	59222.5	22280.1	36531.2	26202	54793.7	38004.3	56119.2	-	CM00232	MetMap106
Lmfp001509	1-O-Galloyl-rhamnose	0	Phenolic acids	Phenolic acids	C13H16O9	317.09	153.02	316.079	[M+H]+	3	-	-	29724.2	38806	77252.4	116815	112711	75039	95255.3	86220.2	90322	83670.3	76651.3	82290.2	97073.9	122718	97669.7	51331.1	55665.9	62114.8	-	-	-
pmb0501	Agmatine	0	Alkaloids	Alkaloids	C5H14N4	131.13	114.1	130.122	[M+H]+	3	306-60-5	C00179	94471.1	135115	184016	97523.3	70296.9	30958.8	62490.2	34791.6	50542.4	51623.4	71755.2	85091.6	28307.4	29495.1	28012	79165.5	88847.9	67029.2	ko00330,ko00999,ko01100,ko01110	C00179	-
PDP227507	seiricardine A*	0	Terpenoids	Sesquiterpenoids	C15H26O2	239.2	95.09	238.193	[M+H]+	1	-	-	35503.4	30440.4	27936.8	75815.5	49237.2	63393.6	48335.6	65815.3	64011.7	56606.7	54387.8	77836.7	62666	71224.9	59524.3	52541.7	52697.6	61543.4	-	-	-
MWS2027	Barbiturate	0	Nucleotides and derivatives	Nucleotides and derivatives	C4H4N2O3	129.03	69	128.022	[M+H]+	3	67-52-7	C00813	574022	566424	562252	272831	201912	314038	141209	136333	169429	192747	66185.6	101194	309383	187478	274842	325116	315910	234901	ko00240,ko01100	C00813	-
MWS0812	Trimethylamine N-Oxide	0	Alkaloids	Alkaloids	C3H9NO	76.08	58.07	75.0684	[M+H]+	3	1184-78-7	C01104	27613.1	37370.8	34726.8	32451.3	27216.1	29830.8	25806.3	21608.5	34692.6	28331	20268.6	19218.4	21574.3	25321.9	26520.5	30930	35398.6	25720.6	ko01100	C01104	-
pmb0808	Esculetin-6-O-quinic acid	0	Lignans and Coumarins	Coumarins	C16H16O9	353.1	179	352.079	[M+H]+	3	-	-	63513.7	57418.7	57622.7	37636.2	26492.9	32280.6	28810.8	27105.6	47100.6	38163.3	47835.9	43797.5	25267.6	18923.5	15324.9	63780.3	28787.1	38702.1	-	-	-
Walbp01749	N-Glucosylpicolinate*	0	Alkaloids	Pyridine alkaloids	C12H16NO7+	286.09	124.04	286.093	[M]+	2	-	-	215843	180362	141544	133582	128461	75466.6	99098.5	79142.3	95091.2	124634	130954	146458	30700.3	35691.6	21491.2	92483.8	102591	97450	-	-	-
Walp004391	7-C-Glucosylcoumarin	0	Lignans and Coumarins	Coumarins	C15H16O7	309.1	147.04	308.09	[M+H]+	2	-	-	857359	899144	639467	309510	282563	370818	338275	420383	338633	519733	715511	480098	56512.5	56512.5	56512.5	420747	474764	389883	-	CM01439	MetMap133
mws0987	6-MethylCoumarin	0	Lignans and Coumarins	Coumarins	C10H8O2	161.06	115.05	160.052	[M+H]+	3	92-48-8	-	61680.7	67457.9	50641.7	44768.9	48880.6	38367.5	56253.5	39038.4	22019.5	36792.6	24546.7	47321.1	24804.1	25570.9	41480.8	17063.1	15264.1	18287.3	-	CM01416	MetMap133
MWStz279	1-Methoxycarbonyl-β-Carboline-N-Oxide	0	Alkaloids	Plumerane	C13H10N2O3	243.08	183.06	242.069	[M+H]+	3	74690-74-7	-	261904	301192	241798	172385	213801	169189	64740	109353	110143	168943	233265	200640	26226.7	32198.9	33583.3	188498	201378	163535	-	-	-
PD0623931	Funatrol C	0	Terpenoids	Sesquiterpenoids	C15H24O2	237.18	161.13	236.178	[M+H]+	1	-	-	19036.8	14980.6	2996.13	32031.9	43639.2	55813.8	44429.7	53565.1	35672	51161.4	38938	54258.1	56476.5	54911	50853.8	25945.5	29576.3	32832.1	-	-	-
PDP158244	6beta,7beta-Dihydroxykaurenoic acid	0	Terpenoids	Ditepenoids	C20H30O4	335.22	159.12	334.214	[M+H]+	2	26109-32-0	C11876	10766.7	11005.3	11312.1	22663.3	30091	33974.8	24680.3	40529.6	21356.5	38427.3	34343	56359.8	36282.5	42042.5	31063.2	28818	39301.5	37035.7	ko00904,ko01110	C11876	-
Walp004906	2-Aminotetradecane-1,11,13-triol	0	Lipids	Sphingolipids	C14H31NO3	262.24	88.08	261.23	[M+H]+	1	-	-	5718.53	43721.9	1143.71	29030.2	30302.6	85475.5	33098.8	32771.4	148737	73824.4	23349.6	228823	10868.1	69035.1	180866	102926	71666.1	114455	-	-	-
Safp000397	6-(alpha-D-glucosaminyl)-1D-myo-inositol	0	Others	Others	C12H23NO10	342.14	306.12	341.132	[M+H]+	3	-	-	43752.2	53776.8	54601.1	41498.9	31222.2	40667.3	46768	46543.5	34985.5	45262.7	31955.7	34852.6	30238.7	45935.1	20746.4	23623.5	56520.2	46952.8	-	-	-
Lcfp031603	N5-(4-Methoxybenzyl)glutamine	0	Amino acids and derivatives	Amino acids and derivatives	C13H18N2O4	267.13	121.06	266.127	[M+H]+	2	-	-	270448	258519	141084	132817	111089	68992.9	100996	98291.5	95265.3	79278.8	78166.9	114278	19598.7	18867.1	11162.8	48293.3	92576.7	81491.7	-	-	-
MWS04412	N(6),N(6)-Dimethyl-L-lysine	0	Amino acids and derivatives	Amino acids and derivatives	C8H18N2O2	175.12	70.07	174.137	[M+H]+	3	2259-86-1	-	719402	629513	708734	195777	220175	219493	297517	258208	247311	143774	203669	198067	12872.8	26200.7	12126.9	357380	388934	341193	-	-	-
Lazp005998	Guaianediol	0	Terpenoids	Sesquiterpenoids	C15H26O2	239.2	107.09	238.193	[M+H]+	2	-	-	10484.8	19158.4	37974.8	31089.5	34495.1	20714.3	32943	36276.3	47093.9	34010.9	24339.1	38767.9	18179.2	39166.7	38019.7	25140.2	23045.8	14312.8	-	-	-
MWStz073	5-Hydroxy-2-pyrrolidinone	0	Alkaloids	Pyrrole alkaloids	C4H7NO2	102.05	84.05	101.048	[M+H]+	3	62312-55-4	-	207015	197409	226274	153588	121083	140122	113087	134046	106469	135529	109052	90707.9	176439	152010	158584	139648	156777	152069	-	-	-
MW0155982	Pro-Pro-Ser	0	Amino acids and derivatives	Amino acids and derivatives	C13H21N3O5	300.15	86.1	299.148	[M+H]+	3	-	-	190140	102033	275196	103900	67794.7	101453	169455	99574.2	96198.9	213444	148014	126245	121847	61322.9	128766	56229.3	81102.8	76839.6	-	-	-
Rlp04443	4-Methoxy-5-methyl-7-[3,4,5-trihydroxy-6-(hydroxymethyl)oxan-2-yl]oxychromen-2-one*	0	Lignans and Coumarins	Coumarins	C17H20O9	369.12	207.07	368.111	[M+H]+	3	-	-	152173	93499.8	131382	117637	84159.9	113056	82113.7	90519.6	98975.8	83813.9	73456	131539	98987.6	111162	115486	138099	91857.5	95313.5	-	-	-
Sasp003889	Decaethylene glycol	0	Others	Alcohol compounds	C20H42O11	476.31	459.28	458.273	[M+NH4]+	3	5579-66-8	-	3734.19	3734.19	29985.1	21137.5	46604.6	36182.9	30137.1	45251	32489.9	33656.2	33024	56502.7	36162.8	37707.6	19989.5	34919.1	21274.7	18671	-	-	-
Lmhp008718	LysoPC 17:2*	0	Lipids	LPC	C25H48NO7P	506.32	184.07	505.317	[M+H]+	3	-	-	100243	107248	71744.6	49459.4	48232.6	55974	34883.3	33021.7	27934.8	5586.96	5586.96	5586.96	54026.8	49094.7	29885	70550.3	55256.3	59078.5	-	-	-
Rfn05591	(5,11-dioxo-6a,11-dihydroisoindolo[2,1-a]quinazolin-6(5H)-yl)acetic acid	0	Alkaloids	Alkaloids	C17H12N2O4	309.09	263.09	308.08	[M+H]+	3	1630763-89-1	-	84276	98834.5	109582	68739.3	52228.3	57679.4	44720.8	43684.8	44677.5	70418.3	59106.5	73129.9	8736.95	8736.95	8736.95	60698.4	50026.2	54445.8	-	-	-
Zbkp003207	Isovitexin 2''-O-beta-D-glucoside	0	Flavonoids	Flavones	C27H30O15	595.16	313.07	594.159	[M+H]+	2	60767-80-8	C04199	130874	110461	67277	72712.6	24473	49461.6	36851.3	52361.6	51707.4	59409.9	84664	62755.6	53171.1	15432	10359	76261.1	66789.1	38048.2	ko00944	C04199	-
MWStz456	Saponarin	0	Flavonoids	Flavones	C27H30O15	595.17	415.11	594.159	[M+H]+	2	20310-89-8	C08064	76261.3	111117	55623.1	66245.1	63029.2	3748.02	18740.1	67354.6	42657.8	42652.9	67874.3	66597.7	51208.8	57649.8	20689.9	65875.7	101827	65371.8	-	C08064	-
PD0592635	Adenosine 2',3'-cyclic phosphate*	0	Nucleotides and derivatives	Nucleotides and derivatives	C10H12N5O6P	330.06	136.06	329.053	[M+H]+	1	634-01-5	-	42723.7	40721.5	21702.6	116252	139852	145265	98433.7	111590	85378.8	72504.1	63661.7	83941.7	201944	239962	248391	145305	121043	132273	-	-	-
WapTKC009174	7-Oxo-8(14),15-Pimaradien-19-Oic Acid	0	Terpenoids	Ditepenoids	C20H28O3	317.21	119.09	316.204	[M+H]+	2	23807-90-1	-	173911	232775	223186	14759.4	18151.3	15417.8	18247.6	23664.1	28695.2	157867	180723	164683	18368.7	18651.4	14959.6	94727.3	79034.6	86166.6	-	-	-
Zahp013981	N-(2-Methylpropyl)octadeca-2,4,12-trienamide	0	Alkaloids	Alkaloids	C22H39NO	334.31	334.31	333.303	[M+H]+	3	151391-69-4	-	55468.4	74287	66412.3	74813.5	58772.1	76657.4	86694.9	60263.2	86733.2	97072.5	68028.6	56987.3	84972.9	65812.9	82691.5	67893.7	68379	72235.9	-	-	-
Lcsp002477	Gly-Val-Leu	0	Amino acids and derivatives	Amino acids and derivatives	C13H25N3O4	288.19	129.1	287.185	[M+H]+	3	-	-	14427.6	28630.7	2885.52	45246.4	20813.3	54311	25760.6	38353.3	22707.4	24405.8	40139.2	26751	32652.3	47309.1	56412.7	39936.7	19695.2	42730.1	-	-	-
pmb0764	5-(2-Hydroxyethyl)-4-methylthiazole	0	Others	Others	C6H9NOS	144.05	113.03	143.041	[M+H]+	3	137-00-8	C04294	70061	52275.3	50383.6	14485	30332.2	39301.8	23596.7	30140.3	15608.4	39220.5	32100.9	28026.5	17455.4	31659.4	54459.7	66303	28967.8	60653.4	ko00730,ko01100,ko01240	C04294	-
Zblp007848	7-hydroxy-2-methoxyphenanthrene-1,4-dione	0	Quinones	PhenAnthraquinones	C15H10O4	255.07	184.05	254.058	[M+H]+	3	-	-	42298.9	44476.9	35502.6	13376.3	18782	38206.4	9789.86	17657.4	8091.1	33074	72173.3	25729.6	17974.6	26796	9429.91	40549.4	35651.8	39606.8	-	-	-
WapTKC214327	atramacronoid M	0	Terpenoids	Sesquiterpenoids	C15H24O2	237.18	201.16	236.178	[M+H]+	1	-	-	1986.23	1986.23	9931.16	15741.7	25410.9	27923.9	24839.1	43688.4	15451.8	34864.1	24567.6	32207.3	31437.5	30905.9	29558.1	15790	21902	11860	-	-	-
Wdjp010178	Blestriarene A	0	Others	Others	C30H26O6	483.18	241.09	482.173	[M+H]+	3	-	-	42529.2	53479.5	8505.83	50872.9	64641.6	72417.5	103604	128967	110556	100748	103774	102726	103210	115210	77317.2	101937	102871	95370.5	-	-	-
PDP215788	1-(4-hydroxy-3-methoxyphenyl)dec-7-en-3-one	0	Others	Others	C17H24O3	277.18	137.06	276.173	[M+H]+	3	-	-	106417	78006	54933.4	21033.9	24947.6	25614	15205.8	27084.7	20719	38658	30109.8	36685.4	45131.3	52202.1	21722.6	64095.5	75462	71670.7	-	-	-
Lcsp011354	1-amino-2,11-dihydroxyicosa-12,14-dien-3-one	0	Lipids	LPE	C20H37NO3	340.28	62.06	339.277	[M+H]+	2	-	-	106262	117277	88708.5	75469.8	72998.7	58135.5	44690.4	58871.7	45640.6	44593.6	55507.8	43542.9	49369.4	58691.4	53721.2	70889.5	83560	73293.4	-	-	-
Lhfp112913	Dihydrojuglone	0	Quinones	Quinones	C10H8O3	177.05	131.05	176.047	[M+H]+	2	-	-	56189.7	86008.2	97882.7	52666.2	105338	93355.4	139413	125605	101446	117934	116915	87531.5	109502	100045	88040.1	59737.5	106690	88847.6	-	-	-
HJAP058	4',5,6,7-Tetramethoxyflavanone	0	Flavonoids	Flavanones	C19H20O6	345.1	284.07	344.126	[M+H]+	3	2569-77-9	C15118	2.31309e+06	2.61133e+06	462618	462618	3.60796e+06	4.28804e+06	2.94633e+06	3.00247e+06	4.49629e+06	4.04909e+06	5.83359e+06	3.93033e+06	3.60102e+06	3.71731e+06	3.40665e+06	3.41434e+06	3.43172e+06	3.69156e+06	-	C15118	-
Zmsp002451	5-Acetyl-2,3-dihydro-6,7-dimethyl-1H-pyrrolizine	0	Alkaloids	Pyrrole alkaloids	C11H15NO	178.12	134.1	177.115	[M+H]+	3	-	-	76254.9	62707.3	65435.1	47290.8	17052.2	37866	43408.2	44283.4	16889	61484.1	66127.4	40971.1	3377.81	3377.81	3377.81	25776.5	39033.5	17717.7	-	-	-
Zmmp002167	L-Glutamyl-L-Tyrosine	0	Amino acids and derivatives	Amino acids and derivatives	C14H18N2O6	311.12	136.07	310.116	[M+H]+	3	-	-	4042.8	4042.8	4042.8	34812.6	42346.9	40409.4	68219.9	59817.6	65939	20214	73574	52089.2	99474.1	105125	98404.9	50411.5	67674.4	82343.6	-	-	-
Cmlp002967	Gentiolactone	0	Terpenoids	Monoterpenoids	C10H12O5	213.07	149.06	212.069	[M+H]+	2	-	-	44454.6	51049.8	8245.41	124992	130166	172953	46719.2	82987.7	56337.7	52500.7	139134	41227.1	68583.8	161678	124431	66235.2	60846.4	105405	-	-	-
PDP239698	Feruloyl lysine*	0	Alkaloids	Phenolamine	C16H22N2O5	323.17	177.05	322.153	[M+H]+	3	-	-	495033	342642	275129	163605	293654	165823	88492.5	108274	111555	194808	276506	78424.4	81327.5	88069.4	47560.9	181967	146640	159988	-	-	-
Lmyp003951	3,4-Dihydroxy-3-methoxypropiophenone	0	Others	Ketone compounds	C11H14O5	227.09	181.09	226.084	[M+H]+	3	-	-	135673	128561	100344	43389.3	8354.93	25065	41203.8	103103	66592	67796.2	111263	67075.1	79546.9	61624	28129.6	72515.5	100890	73072.6	-	-	-
PDP135748	methyl 3-(3,4-dihydroxyphenyl)-2-{[3,4,5-trihydroxy-6-(hydroxymethyl)oxan-2-yl]oxy}propanoate	0	Phenolic acids	Phenolic acids	C16H22O10	375.13	178.06	374.121	[M+H]+	3	-	-	24976.7	67726.5	64714.5	26375.7	12172.4	19223.6	30130.6	55740	27518.5	46254.4	36551.2	44871.4	37793.6	27910.1	3327.3	32088.4	26224.9	45947.5	-	-	-
Lcsp001149	Pro-Val-Thr	0	Amino acids and derivatives	Amino acids and derivatives	C14H25N3O5	316.19	70.07	315.179	[M+H]+	3	-	-	44809.2	52981.8	43964.9	29062.3	27653.2	20231	17052.6	24655.2	26909.4	16488.9	28816.8	12781.9	38757.1	19778	18237.6	27404.5	40336.4	15368.3	-	-	-
Safp000959	N-[(4-methoxyphenyl)methyl]-2-(7H-purin-6-ylsulfanyl)acetamide	0	Alkaloids	Alkaloids	C15H15N5O2S	330.09	121.06	329.095	[M+H]+	3	-	-	68591.6	68827.1	62805.2	20875.4	14872.7	24921	10884.6	12512.9	16313	20967.4	23525.9	23389	21266.7	20723.9	29253.4	41159	47858.6	23335.3	-	-	-
Zbsp010536	Methyl-[8]-gingerol	0	Phenolic acids	Phenolic acids	C20H32O4	337.25	137.06	336.23	[M+H]+	3	-	-	131199	147414	156994	86631.6	86818.8	56818.1	47020.2	41117.6	50046.5	72888.5	37028.4	51478.7	90505.1	70236.1	83411.9	88039.9	90362	89070	-	-	-
Cmsp007094	Nudol	0	Quinones	PhenAnthraquinones	C16H14O4	271.1	225.09	270.089	[M+H]+	2	86630-46-8	-	23646.3	28125.7	18421.7	43418.1	52901.2	53874.9	94434.6	110878	106921	19843.9	18365.2	10450.2	88598.9	92888.1	59996.9	72125.7	50125.9	78472.8	-	CM02179	MetMap162
Rfn07761	Myristamine oxide	0	Others	Others	C16H35NO	258.28	258.28	257.272	[M+H]+	3	3332-27-2	-	4927.81	4927.81	4927.81	75043.7	48335.6	95448.3	42685.5	69898.8	122643	61611.3	38037.4	129190	24639	46754.2	110979	49394.6	99007.2	63268.2	-	-	-
Lmhp009590	LysoPC 17:1	0	Lipids	LPC	C25H50NO7P	508.34	184.07	507.332	[M+H]+	2	-	-	187631	171695	175055	137468	109032	147948	86346.9	87506.2	88238	69421.5	64524.6	83728.3	104926	100569	125209	97306.3	138622	106743	-	-	-
Qayp010069	Solidagenone	0	Terpenoids	Ditepenoids	C20H28O3	317.21	119.09	316.204	[M+H]+	2	23534-56-7	-	178661	172691	156362	10310.6	13623.2	24463.9	22754.8	27047.2	21073.6	106820	176178	112887	2062.13	2062.13	2062.13	94387.3	64487.3	71281.6	-	-	-
Wahlp08069	LysoPC 17:2(2n isomer)*	0	Lipids	LPC	C25H48NO7P	506.32	184.07	505.317	[M+H]+	3	-	-	116259	96485.2	88129.1	50205.3	43848.3	70019.9	32926.6	29782	20515.6	21461.6	31967.6	23808.6	44734.9	39889.7	30885.5	56482.6	69643.9	53092.6	-	-	-
PD1011788	N-Feruloylserotonin	0	Alkaloids	Phenolamine	C10H11NO3	194.08	117.03	193.074	[M+H]+	3	68573-23-9	-	42932.4	42665.5	46254.6	43032.8	32720	22574.4	30019.6	29418.4	27435.5	38435.5	33908.6	30078.2	14582.5	23203.2	12561.1	17451.8	42207	30185	-	-	-
pme2693	N-Acetylputrescine	0	Alkaloids	Alkaloids	C6H14N2O	131.12	114.09	130.111	[M+H]+	3	18233-70-0	C02714	137235	135615	125635	51936.6	68510.5	78111.9	65373.5	53210.6	86597	49742.3	64852.1	67921.5	17009.4	26301.6	19300.3	85130.3	50834.2	54273.3	ko00330,ko01100	C02714	-
Rp0029156	2,3-dihydroxycinnamic acid	0	Phenolic acids	Phenolic acids	C9H8O4	181.05	135.04	180.042	[M+H]+	1	31082-90-3	C12623	511563	414082	379792	218427	104369	8574.27	147089	105039	129084	153438	169866	246348	123295	71819.1	42871.4	277025	258101	109367	ko00360,ko01100	C12623	-
Hmhp009516	ZP-amide M	0	Alkaloids	Alkaloids	C16H29NO2	268.23	179.14	267.22	[M+H]+	3	-	-	62838.4	40478	34795.6	24421	25060.3	19100.1	1432.59	1432.59	1432.59	55829.2	21134.6	14056.9	8484.67	15458.8	7162.96	70530.6	67531.9	63150.3	-	-	-
Walp003918	1-O-p-Coumaroylsedoheptulose	0	Phenolic acids	Phenolic acids	C16H20O9	357.12	147.04	356.111	[M+H]+	2	-	-	28859.7	66597.7	16296.3	62542.9	68831.3	107189	46903.8	55380.3	62015.4	70378	82467.2	48742	79430	76628.9	106557	65284.7	50534.3	51610.6	-	CM02666	MetMap169
Sadp005873	Prosopidione	0	Terpenoids	Monoterpenoids	C13H20O2	209.15	95.05	208.146	[M+H]+	3	-	-	13394.2	13394.2	13394.2	91050.5	94147.8	150245	104950	160942	151036	124086	175751	131906	202746	133274	114428	66970.8	140058	92461.4	-	-	-
WapTKC213496	Hyperhubein H*	0	Terpenoids	Sesquiterpenoids	C21H36O7	401.25	135.12	400.246	[M+H]+	1	-	-	19098.5	14979.9	17629.3	20966.8	26191.6	30477.8	20774.9	13985.1	34534	29537	16532.8	27206.2	25481.5	15174.5	22844.6	20896.7	14058.6	19564.9	-	-	-
Wbwp006397	(3r,4r)-3-(2h-1,3-benzodioxol-5-ylmethyl)-4-[(4-hydroxy-3-methoxyphenyl)methyl]oxolan-2-one*	0	Lignans and Coumarins	Lignans	C20H20O6	357.13	307.1	356.126	[M+H]+	3	-	-	10742.1	12923	1427.95	13654.6	20988.8	7139.75	11665.5	17772.7	9797.25	7962.2	16001.1	16262.8	16317.5	15727.5	10692.3	10266.9	14392.5	11550.8	-	-	-
mws0572	5-Methylcytosine	0	Nucleotides and derivatives	Nucleotides and derivatives	C5H7N3O	126.07	109.04	125.059	[M+H]+	3	554-01-8	C02376	51481.6	63974	69463.4	101903	85309.8	109004	106515	89339.4	100312	72077.4	106146	83617.3	104645	121019	89616.9	78942.3	84947.8	80272.9	ko00240,ko01100	C02376	-
MWS1771	L-Tyrosine methyl ester	0	Amino acids and derivatives	Amino acids and derivatives	C10H13NO3	196.1	91.05	195.089	[M+H]+	3	1080-06-4	C03404	60636.9	19382.6	15856.5	22705.8	17287.7	21588.5	10932.3	13200.9	10416.5	18626.1	19574.1	34695.5	2083.29	2083.29	2083.29	16457.5	17170.1	15537.4	-	C03404	-
MWSHC2088	1-epi-10β-Hydroxycadin-4-en-15-al	0	Others	Others	C15H24O2	237.19	145.1	236.178	[M+H]+	2	911061-20-6	-	2928.12	2928.12	2928.12	29103.8	26684.3	27051.6	52851.3	27897.4	34406.9	29246.2	40618.6	31340.6	14640.6	15732.8	25678	31198.2	24698.6	29237.4	-	-	-
Zbjp002681	1,7-bis(4-hydroxy-3-methoxyphenyl)hept-1-ene-3-ol	0	Others	Ketone compounds	C21H26O5	359.18	137.06	358.178	[M+H]+	2	-	-	94938	121847	59273.2	45662.9	70949.2	30231.4	53318.3	30038.8	27935.8	30355.3	24833.8	44460.3	35583.5	22387.4	33068.7	68672.3	86441.1	89195.1	-	-	-
Wafp002988	1-O-Feruloyllysine*	0	Alkaloids	Phenolamine	C16H22N2O5	323.16	177.06	322.153	[M+H]+	3	-	-	531533	312378	294218	216009	167965	91455.7	88287.7	83279.1	92121.1	189012	239651	302199	45313.4	78480	51907.7	146654	216333	132141	-	-	-
MWS1792	Butylamine	0	Alkaloids	Alkaloids	C4H11N	74.1	57.07	73.0891	[M+H]+	3	109-73-9	-	104149	118586	78976.1	75166.3	107552	68577.2	74576.2	56514.3	61130.2	80102.6	110350	71550.9	68128.7	46754.8	51836.9	74619.1	80875	71192.9	-	-	-
MWSHY0189	Apigenin 7-O-beta-D-glucoside*	0	Flavonoids	Flavones	C21H20O10	433.11	271.07	432.106	[M+H]+	3	578-74-5	C04608	179062	230108	223357	115228	74899.1	79646.2	145690	154286	132849	122319	137463	154233	14979.8	14979.8	14979.8	188707	130357	192184	ko00944	C04608	-
PDP106504	20beta-carboxylconidiogenone C*	0	Terpenoids	Ditepenoids	C20H28O3	317.21	149.1	316.204	[M+H]+	2	-	-	561967	545293	498302	15447.4	19034.3	12508.6	2501.72	2501.72	2501.72	402999	483121	387861	2501.72	2501.72	2501.72	226597	215557	214195	-	-	-
PDP053473	Phomodiol	0	Terpenoids	Sesquiterpenoids	C16H26O3	267.19	107.08	266.188	[M+H]+	3	-	-	54745.6	52651	23812.7	6651.23	20214.2	17404.6	3984.7	12992.7	10765.7	13071.9	20126.9	12938.8	796.941	796.941	796.941	21423.5	39996.5	31713	-	-	-
Lmcsp00364	N2-Succinyl-L-arginine	0	Amino acids and derivatives	Amino acids and derivatives	C10H18N4O5	275.14	175.12	274.128	[M+H]+	3	2478-02-6	C03296	32155.5	37789.5	13516.4	17841.7	18020.3	10005.3	16816.1	19928.5	18970.7	11640.6	15326.5	17116.8	14683.5	19366.9	23985	23112.9	27295.4	30723.1	ko00330,ko01100	C03296	-
WapTKC034280	6-Eudesmene-1,4-diol 1-O-β-D-Glucopyranoside*	0	Terpenoids	Sesquiterpenoids	C21H36O7	401.25	135.12	400.246	[M+H]+	1	1204210-53-6	-	2185.93	2185.93	2185.93	16895	22597.3	16348.8	21046.6	23621.4	12906.5	21157.3	19350.3	22752.3	16728.6	18689.9	10929.6	24060.1	19835.2	27934.5	-	-	-
Qmjp080503	7α-Hydroxyeudesm-4-en-6-one	0	Terpenoids	Sesquiterpenoids	C15H24O2	237.15	159.12	236.178	[M+H]+	2	-	-	3976.79	3976.79	3976.79	27657.2	30637.5	27580.3	19884	43097.3	30781.8	30728	28306	45605.1	28355.1	52354.5	24700.5	30301.2	31361.6	23465.9	-	-	-
Cmxp003457	Decumbensine;Egenine	0	Alkaloids	Isoquinoline alkaloids	C20H19NO6	370.13	190.1	369.121	[M+H]+	3	6883-44-9	-	121567	52223.9	65667	7648.07	7648.07	7648.07	42235.3	75829.2	44760.5	122623	42056.4	38240.3	7648.07	7648.07	7648.07	75195	57319.6	49037.1	-	-	-
Rdp04362	4,2',3'-Trihydroxychalcone 4-O-glucoside*	0	Flavonoids	Chalcones	C21H22O9	419.13	257.08	418.126	[M+H]+	3	-	-	405450	391134	495370	113793	137058	82073.3	16414.7	16414.7	16414.7	166347	87871.7	138751	16414.7	16414.7	16414.7	175318	202005	178661	-	-	-
MWSHC20172	Isoscopoletin	0	Lignans and Coumarins	Coumarins	C10H8O4	193.05	178.03	192.042	[M+H]+	3	776-86-3	C18079	44479.7	56158.2	32825.2	41817.7	28020.7	36379.4	2833.6	2833.6	2833.6	39387.9	27839.2	78595.8	29403.5	14168	24876.8	33417.8	29944.7	18056.9	ko00999	C18079	-
PDP005932	Dihydrodaidzin	0	Flavonoids	Flavanones	C21H22O9	419.13	257.08	418.126	[M+H]+	1	121927-96-6	-	628958	516095	542924	418229	82419.3	86025.2	92757.1	107060	137837	243473	319315	259864	16483.9	16483.9	16483.9	225003	265346	198817	-	-	-
MWStz085	Aurantiamide	0	Alkaloids	Alkaloids	C25H26N2O3	403.2	117.07	402.194	[M+H]+	1	58115-31-4	-	127641	110467	93815.1	1514.24	1514.24	1514.24	1514.24	1514.24	1514.24	27849.8	34125.8	28114.6	11652.5	15597.7	7571.18	38707.9	35176.2	37190.2	-	-	-
pmp000579	Diosmetin-7-O-galactoside*	0	Flavonoids	Flavones	C22H22O11	463.12	301.07	462.116	[M+H]+	2	-	-	6472.54	6472.54	6472.54	93286.9	81363.6	126116	147186	105318	97516	183227	110941	180199	79184.5	85620.5	32362.7	77212.2	90806.8	65879.3	-	-	-
PD0222792	(4R)-4-methyl-L-proline	0	Amino acids and derivatives	Amino acids and derivatives	C6H11NO2	130.09	56.05	129.079	[M+H]+	1	23009-50-9	-	1.74138e+06	1.08649e+06	1.55458e+06	445597	360030	334592	399671	427721	504022	381191	466874	559801	873257	1.17529e+06	804740	653635	689494	596286	-	-	-
Wasdp03092	Isoscoparin 2''-O-glucoside*	0	Flavonoids	Flavones	C28H32O16	625.17	463.13	624.169	[M+H]+	2	97605-25-9	-	2265.39	2265.39	2265.39	20880.7	36897.1	23263	36334.2	41185.3	29464.5	30899.1	12681.6	27696.1	46148.8	44775.8	67484	24278.7	11327	33218.6	-	-	-
MWStz201	β-Carboline-1-propanoic acid	0	Alkaloids	Plumerane	C14H12N2O2	241.1	223.09	240.09	[M+H]+	3	89915-39-9	-	123851	109758	79464.9	110783	26131.5	59218	34965.1	17729.7	24400.6	110587	71740.9	89686.1	3545.94	3545.94	3545.94	31124.3	59194.5	54513.5	-	-	-
MWSslk022	Decursinol angelate	0	Lignans and Coumarins	Coumarins	C19H20O5	329.14	229.1	328.131	[M+H]+	3	130848-06-5	-	11531.5	14592.6	13662.1	16909.1	13710.6	26726.8	12793.4	18629.1	18998.2	20076.6	22012	16276.5	19406.2	14984.7	24570.9	13452.7	17336.6	10053.7	-	-	-
WapTKC156168	(1R,3R,4aS,10aR)-3-hydroxy-1,4a-dimethyl-7-prop-1-en-2-yl-2,3,4,9,10,10a-hexahydrophenanthrene-1-carboxylic acid	0	Terpenoids	Ditepenoids	C20H26O3	315.19	269.19	314.188	[M+H]+	2	-	-	6430.08	6430.08	6430.08	138188	135117	152941	86482.9	32150.4	109600	63623.4	119929	76936.1	79534.8	81691	114694	97241.1	100476	128824	-	-	-
WapTKC007932	3-Hydroxy-8,11,13-Abietatrien-18-Oic Acid*	0	Terpenoids	Ditepenoids	C20H28O3	317.21	149.1	316.204	[M+H]+	2	-	-	549052	552654	518723	8115.74	13157.3	28129.6	1623.15	1623.15	1623.15	395887	486247	406936	1623.15	1623.15	1623.15	245954	267809	240998	-	-	-
Rdp007186	Remangiflavone A	0	Flavonoids	Flavones	C25H26O5	407.19	283.06	406.178	[M+H]+	1	-	-	1155.71	1155.71	5778.57	16669.8	8789.81	11269.1	24128.2	17231.7	22640.3	5971.65	12639	10539.2	16784.9	13639	12290.7	22931.6	17449.5	26385.8	-	-	-
pmb0296	1-Oleoyl-Sn-Glycerol	0	Lipids	Glycerol ester	C21H40O4	357.3	265.25	356.293	[M+H]+	3	129784-87-8	-	279109	241974	221560	184533	159925	181614	159421	237005	188701	131838	120148	148587	209505	151421	120166	186701	145000	190428	-	-	-
PD0281894	4-[7-hydroxy-2,5,5,8a-tetramethyl-1,4,4a,5,6,7,8,8a-octahydronaphthalen-1-yl]butan-2-one	0	Terpenoids	Sesquiterpenoids	C18H30O2	279.23	121.1	278.225	[M+H]+	1	-	-	10299.8	10299.8	10299.8	116792	127584	161238	99403.3	60632.5	84282.9	10299.8	10299.8	10299.8	51499.1	74469.1	101171	64229.5	60568.2	101964	-	-	-
Zmyp002823	((1S,7aR)-hexahydro-1H-pyrrolizin-1-yl)methyl 4-hydroxy-4-methoxy-2-(4-((3,4,5,6-tetrahydroxytetrahydro-2H-pyran-2-yl)methoxy)benzyl)butanoate	0	Alkaloids	Pyrrole alkaloids	C26H39NO10	526.27	364.22	525.257	[M+H]+	2	-	-	609311	324971	332318	181476	281190	150064	41914	179096	126439	8382.79	8382.79	8382.79	8382.79	8382.79	8382.79	172841	308219	246444	-	-	-
Wdjp008771	1-[(7-Hydroxy-4-methoxy-9,10-dihydrophenanthren-2-yl)oxy]-4-methoxyphenanthrene-2,7-diol	0	Others	Others	C30H24O6	481.17	241.09	480.157	[M+H]+	1	-	-	195690	196514	171653	38014.6	77375.1	137806	54378.3	57391.9	125132	109907	96298.2	86822.9	55123.5	37498.5	49382.1	91204.5	95783.6	163084	-	-	-
MWSmce182	Isatin	0	Alkaloids	Plumerane	C8H5NO2	148.04	102.03	147.032	[M+H]+	3	91-56-5	C11129	3478.24	3478.24	3478.24	28458.1	52292.2	64699.5	21080.4	28561.2	21716.3	63087.7	25437.2	35991.8	39622	29811.5	34940.3	22962.3	42765.2	17391.2	-	C11129	-
HJAP048	2,4,5-Trimethoxybenzoic acid	0	Phenolic acids	Phenolic acids	C10H12O5	213.07	195.07	212.069	[M+H]+	3	-	-	115990	111203	74562	2736.85	2736.85	2736.85	58103.2	35173.9	45328.1	48711.3	65987.1	37432.6	13684.3	22051.7	21475.7	36038.8	75337	39947.8	-	CM02414	MetMap157,MetMap160
PD0800260	Phe-Trp	0	Amino acids and derivatives	Amino acids and derivatives	C20H21N3O3	352.17	120.08	351.158	[M+H]+	3	-	-	33815.4	23214.8	4642.96	54038.6	78932.8	33333.3	52283.2	80675.7	78000	80907.3	60136.6	64738.2	51930.4	29029.5	68524.4	63690.6	70333.7	64221.7	-	-	-
PD0325934	Platencin SL5*	0	Terpenoids	Ditepenoids	C20H28O3	317.21	147.08	316.204	[M+H]+	2	-	-	308344	283955	329387	3075.52	3075.52	3075.52	15377.6	16421.1	24166.7	209774	278102	247385	3075.52	3075.52	3075.52	125283	117965	126493	-	-	-
Wbmp010259	3-Hydroxyabieta-8,11,13-trien-7-one*	0	Terpenoids	Ditepenoids	C20H28O2	301.22	255.21	300.209	[M+H]+	1	-	-	153056	103387	149676	24520.1	19104.5	22506.1	3820.9	3820.9	3820.9	53872	59960.5	78941.1	3820.9	3820.9	3820.9	32985.6	43514.8	54003.2	-	-	-
mws0255	Cytosine	0	Nucleotides and derivatives	Nucleotides and derivatives	C4H5N3O	112.05	95.02	111.043	[M+H]+	3	71-30-7	C00380	1.82094e+07	1.83002e+07	1.48985e+07	2.18e+07	2.24385e+07	2.13463e+07	2.25387e+07	2.39834e+07	2.34387e+07	2.25558e+07	2.52818e+07	2.47348e+07	1.88797e+07	2.14947e+07	2.04928e+07	1.81477e+07	2.06805e+07	1.89692e+07	ko00240,ko01100,ko01232	C00380	-
WapTKC002542	14,15-Bisnor-3,11-Kolavadien-13-one	0	Terpenoids	Ditepenoids	C18H28O	261.22	93.07	260.214	[M+H]+	3	126582-61-4	-	123189	194605	77291.4	56853.6	61470.2	112010	60959.9	49422.1	85581.9	67986.3	72789.7	52205.2	77963.9	108549	84173.2	119394	122528	115544	-	-	-
Lmhp010162	LysoPE 17:0	0	Lipids	LPE	C22H46NO7P	468.31	327.29	467.301	[M+H]+	2	-	-	93079.3	122844	81696.9	37021	24656	44412.3	25564.2	37869.6	27866.5	27537.4	44586.4	40630	69897.1	69748.1	46237.1	56434.2	78574.7	60494.9	-	-	-
WapTKC009193	13-Oxo-8(14)-Podocarpen-18-Oic Acid	0	Terpenoids	Ditepenoids	C17H24O3	277.18	123.08	276.173	[M+H]+	3	63976-69-2	-	60985.4	56008.8	65553.3	4005.52	4005.52	4005.52	4005.52	4005.52	4005.52	24002.9	21701.7	20027.6	4005.52	4005.52	4005.52	32239.8	23466.5	45366.4	-	-	-
WapTKC009245	1(10),15-Rosadiene-2,12-dione	0	Terpenoids	Ditepenoids	C20H28O2	301.22	147.08	300.209	[M+H]+	2	913059-57-1	-	87030.1	67399.8	55207.5	14293.9	12195.6	24245.1	22923.8	17147.4	10733.2	31079.9	43137	31827.1	2146.64	2146.64	2146.64	45796.4	29881.3	22086.4	-	-	-
Wbsp001468	Clavatol	0	Terpenoids	Triterpene	C10H12O3	181.08	145.01	180.079	[M+H]+	3	577-45-7	-	672227	634246	720106	721105	349570	455827	611416	648756	360604	571588	500071	967612	292494	480139	407848	548985	486866	472537	-	-	-
Wadp009564	7-Oxopimaric acid*	0	Terpenoids	Ditepenoids	C20H28O3	317.21	147.08	316.204	[M+H]+	2	-	-	338437	299320	291247	637.282	637.282	637.282	3186.41	13003.2	18854.1	199855	276432	217362	637.282	637.282	637.282	110570	116315	113269	-	-	-
WapTKC116279	Borassoside A	0	Steroids	Steroidal saponins	C45H72O16	869.49	415.31	868.482	[M+H]+	1	943518-93-2	-	6970.85	12570.2	10070.5	4938.36	5563.16	4554.33	700.199	700.199	700.199	12931	3500.99	5390.35	700.199	700.199	700.199	4918.99	9461.67	4519.17	-	-	-
PDP157989	(3S,8aS)-Hexahydro-7-hydroxy-3-methylpyrrolo[1,2-a]pyrazine-1,4-dione	0	Amino acids and derivatives	Amino acids and derivatives	C8H12N2O3	185.09	86.06	184.085	[M+H]+	3	1367348-14-8	-	12761	15972	2552.2	19776	28834.3	15169	26190	24249.8	18599.4	30007.3	24212.5	16960.3	21957.9	25017.6	19388.5	33894.8	20891.3	27218.3	-	-	-
MWStz300	Dehydrocrenatidine	0	Alkaloids	Plumerane	C15H14N2O2	255.11	240.09	254.106	[M+H]+	3	65236-62-6	-	4242.85	4242.85	4242.85	4242.85	4242.85	4242.85	21771.9	45632.2	71204.9	63751	66026.7	35494.5	27167.3	60570.8	21214.2	56421	42528.4	37620.7	-	-	-
Hmlp005811	Monbarbatain A	0	Quinones	PhenAnthraquinones	C30H22O6	479.14	239.07	478.142	[M+H]+	1	138711-55-4	-	96435.4	210371	97413.4	5227.16	5227.16	5227.16	26135.8	28085.1	27720.7	5227.16	5227.16	5227.16	5227.16	5227.16	5227.16	43178.9	57415.3	47291.2	-	-	-
Wadp007964	7-Oxo-pimara-8,11,15-trien-2-ol	0	Terpenoids	Ditepenoids	C20H28O2	301.22	147.08	300.209	[M+H]+	3	-	-	69154.7	60743.8	75662.8	3332.96	3332.96	3332.96	3332.96	3332.96	3332.96	23482.5	21132.3	26243.4	3332.96	3332.96	3332.96	18957	16664.8	31713.3	-	-	-
WapTKC163908	(E,4R)-4-hydroxy-2-methyl-5-[(1R,4S,7R,9R)-4,8,8-trimethyl-9-tricyclo[5.2.2.01,5]undec-5-enyl]pent-2-enoic acid	0	Terpenoids	Ditepenoids	C20H30O3	319.23	273.19	318.219	[M+H]+	3	-	-	56119.7	32696.7	32301	3977.09	3977.09	3977.09	3977.09	3977.09	3977.09	43054.9	40638.3	23702.7	3977.09	3977.09	3977.09	38822.8	19885.5	20548.7	-	-	-
Lahp003147	N,N-cinnamoylbutanediamine	0	Alkaloids	Phenolamine	C13H18N2O	219.15	131.05	218.142	[M+H]+	3	-	-	159382	127198	112821	14240.2	14240.2	14240.2	14240.2	14240.2	14240.2	114155	103643	118833	14240.2	14240.2	14240.2	82380.6	115699	71201.2	-	-	-
MWSmce031	Micheliolide	0	Terpenoids	Sesquiterpenoids	C15H20O3	249.14	203.1	248.141	[M+H]+	3	68370-47-8	C09507	19386.9	20453.8	32509.4	1931.32	1931.32	1931.32	1931.32	1931.32	1931.32	24532.9	16664.9	9656.61	1931.32	1931.32	1931.32	15640	27138.4	25876.9	-	C09507	-
Lajp008011	Murratin A	0	Lignans and Coumarins	Coumarins	C15H14O4	259.1	131.05	258.089	[M+H]+	2	-	-	19272.9	17534.5	38407.3	11740.2	5366.19	15232.7	1073.24	1073.24	1073.24	1073.24	1073.24	1073.24	1073.24	1073.24	1073.24	37451.1	27204.4	30242.4	-	-	-
pmc0274	6-Methylmercaptopurine	0	Nucleotides and derivatives	Nucleotides and derivatives	C6H6N4S	167.04	125	166.031	[M+H]+	3	50-66-8	C16614	27033.9	36851.8	33690.4	2550.4	2550.4	2550.4	2550.4	2550.4	2550.4	2550.4	2550.4	2550.4	2550.4	2550.4	2550.4	12752	16300.8	17204.4	-	C16614	-
Lajp008711	2'E-3'-formaldehydylosthole	0	Lignans and Coumarins	Coumarins	C15H14O4	259.1	189.05	258.089	[M+H]+	2	73292-92-9	-	9717.35	12179.8	46378.6	1795.13	1795.13	1795.13	1795.13	1795.13	1795.13	1795.13	1795.13	1795.13	12852.2	19224.7	8975.67	22663.2	31304.5	27017.2	-	-	-
Zmzn000113	L-threo-3-Methylaspartate	0	Amino acids and derivatives	Amino acids and derivatives	C5H9NO4	146.05	102.06	147.053	[M-H]-	1	6061-13-8	C03618	818091	852208	813300	701932	690522	702962	548538	535390	557302	573957	576265	575761	615933	666751	668062	671711	633452	739827	ko00630,ko00660,ko01100,ko01200	C03618	-
pme2559	N-Acetyl-L-aspartate	0	Amino acids and derivatives	Amino acids and derivatives	C6H9NO5	174.04	88.04	175.048	[M-H]-	3	997-55-7	C01042	449483	534162	499785	635234	654236	739083	822882	806236	900181	879241	974464	1.0076e+06	768616	722771	696468	719393	735873	718752	ko00250,ko01100	C01042	-
Zbfn007626	1-Linoleoyl-2-Lysophosphatidic Acid Monobutylamine Ester*	0	Lipids	Glycerol ester	C25H48NO7P	504.31	279.23	505.317	[M-H]-	1	-	-	1.40857e+06	1.2126e+06	1.18352e+06	982600	996428	1.02297e+06	498855	537634	501659	292816	381514	326388	620011	548962	677398	849676	860493	898539	-	-	-
pmn001523	Trigallic acid	0	Phenolic acids	Phenolic acids	C21H14O13	473.04	169.01	474.043	[M-H]-	3	2131-66-0	-	2.28209e+06	2.50565e+06	2.65975e+06	3.76454e+06	3.46882e+06	3.9374e+06	3.54646e+06	3.20347e+06	3.38255e+06	3.46947e+06	3.25208e+06	3.79669e+06	3.38302e+06	3.53937e+06	3.43252e+06	3.20939e+06	3.27432e+06	3.38237e+06	-	-	-
mws0011	Syringin	0	Others	Alcohol compounds	C17H24O9	371.13	209.08	372.142	[M-H]-	2	118-34-3	C01533	1.75747e+06	1.57281e+06	1.38822e+06	571225	665599	594316	59412.4	82778.9	96027.5	474936	542432	565147	195356	162274	230029	713222	660540	794524	ko00940	C01533	MetMap153
Lmbn007891	Hydroxy ricinoleic acid	0	Lipids	Free fatty acids	C18H34O4	313.24	183.14	314.246	[M-H]-	1	-	-	93236.7	96903.5	86456.7	453127	413051	404068	270134	352828	278549	182490	194907	193552	221593	319143	337707	211047	234797	218223	-	-	-
Lmtn002565	1-O-Vanilloyl-beta-D-glucose*	0	Phenolic acids	Phenolic acids	C14H18O9	329.11	167.03	330.095	[M-H]-	1	-	C20470	373458	558008	475558	1.03084e+06	1.11006e+06	1.14959e+06	771603	979914	968968	807825	831907	829684	1.10241e+06	1.27639e+06	850831	819729	714536	834624	-	C20470	MetMap160
Waln011524	1-(2,3-dihydroxypropoxy)-3-(((2-(dimethylamino)ethoxy)(hydroxy)phosphoryl)oxy)propan-2-yl palmitate*	0	Lipids	LPE	C26H54NO9P	554.35	255.23	555.354	[M-H]-	1	-	-	1.57876e+06	1.37955e+06	1.12108e+06	927265	905458	905415	1.05598e+06	1.28312e+06	1.03915e+06	942499	1.0585e+06	1.03586e+06	645661	683239	647991	1.19212e+06	1.21719e+06	1.16178e+06	-	-	-
Zmhn001793	6-O-Caffeoyl-D-glucose*	0	Phenolic acids	Phenolic acids	C15H18O9	341.09	179.03	342.095	[M-H]-	1	-	-	6.33898e+06	6.81819e+06	6.55655e+06	2.31603e+06	2.81136e+06	2.42142e+06	2.62562e+06	2.63754e+06	2.68714e+06	2.97704e+06	3.27944e+06	3.54614e+06	2.68699e+06	2.96804e+06	2.95045e+06	4.17753e+06	3.77373e+06	3.9603e+06	-	CM02655	MetMap168,MetMap169
mws0437	L-Arabitol	0	Others	Saccharides	C5H12O5	151.06	59.01	152.069	[M-H]-	3	488-82-4	C00532	232974	238899	230122	224841	233809	223149	247266	219562	185284	217799	204969	235474	222413	207769	219619	206835	190641	220402	ko00040,ko01100	C00532	-
Lman003972	6-O-Caffeoylarbutin	0	Phenolic acids	Phenolic acids	C21H22O10	433.11	161.03	434.121	[M-H]-	3	136172-60-6	-	77084.5	69903.5	60984.5	52666.2	64597.2	84836.5	49470.2	60476	61271.5	65838.2	60910.7	90196.8	61865.6	65657.2	55347.7	61787.6	41896.9	54898.3	-	-	-
Zazn006864	Nor-toralactone	0	Others	Others	C14H10O5	257.04	213.06	258.053	[M-H]-	3	-	-	70418.6	78853.7	82959	19439.1	30465	42344.6	16211.1	15322.5	23646.7	26337.3	37627.7	28478.7	29705.6	25177.5	17331.6	42387.8	43484.9	38533	-	-	-
Hmmn007137	3-Methoxy-4',5-dihydroxy-trans-stilbene*	0	Others	Stilbene	C15H14O3	241.09	225.05	242.094	[M-H]-	1	42438-89-1	C20154	438170	374965	305091	224708	205913	209672	133994	148925	138831	266925	233386	234824	44592.5	48609.4	37460.9	199559	217548	203558	-	C20154	-
Wacn005438	Hydroxypentadecenoic acid glucoside	0	Lipids	Free fatty acids	C21H38O8	477.27	161.04	418.257	[M+CH3COOH-H]-	1	-	-	171493	171097	151779	226718	269300	254802	209431	211181	258699	236421	241278	252779	186954	173016	175072	206381	184484	222212	-	-	-
pmb2791	9(S)-HPOT	0	Lipids	Free fatty acids	C18H30O4	309.21	209.05	310.214	[M-H]-	3	111004-08-1	C16321	68717.2	75133.8	84794.6	49281.9	63579	61282.7	59668.4	57311.2	62595.9	47336.8	51197.5	56818.1	67246.5	48776.2	59331	53476.4	66290.4	64877.4	ko00592,ko01110	C16321	-
Waln011222	2-(2,3-dihydroxypropoxy)-3-(((2-(dimethylamino)ethoxy)(hydroxy)phosphoryl)oxy)propyl palmitate*	0	Lipids	LPE	C26H54NO9P	554.34	255.23	555.354	[M-H]-	1	-	-	194744	185822	140756	102791	106245	97378	96875.5	102721	95555.1	64191.6	61909.7	71948.4	88572.5	100321	92033.5	134532	139844	130519	-	-	-
MWS1848	Phenyl acetate*	0	Others	Others	C8H8O2	135.05	92.03	136.052	[M-H]-	3	122-79-2	C00548	310771	326378	271976	113313	135205	123122	111702	163197	113972	88255.6	76932	106772	189204	142840	167512	134946	149843	180471	-	C00548	-
Zbln006394	shancigusin F	0	Others	Stilbene	C21H26O8	405.16	243.11	406.163	[M-H]-	1	-	-	2.03666e+06	1.85187e+06	1.83537e+06	1.21135e+06	1.25512e+06	1.18655e+06	353371	384787	367842	838861	865678	901060	253851	270229	283023	907088	924043	885811	-	CM02310	MetMap150,MetMap152
Lmqn009304	Eucalyptin (5-Hydroxy-7,4'-dimethoxy-6,8-dimethylflavone)	0	Flavonoids	Flavones	C19H18O5	325.11	293.08	326.115	[M-H]-	3	3122-88-1	-	29357.2	28613.7	20708.7	11334.3	20080.8	19297.8	10972.4	11029.3	8899.86	11584.9	9558.9	10444.4	8610.56	16862.3	11380.8	25206.9	31758.8	24018.2	-	-	-
pmb2799	12(13)-EpOME	0	Lipids	Free fatty acids	C18H32O3	295.23	195.14	296.235	[M-H]-	1	6799-85-5	C14826	67028.5	71741.7	60137.1	52067.9	56753.1	51357.4	34556.3	41624.7	40727.4	27476.9	39733.3	41726.9	31419.4	40839.9	32844.7	43555.8	52938.8	53393.9	ko00591,ko01100	C14826	-
Lmbn013410	2,4-Di-Tert-Butylphenol	0	Phenolic acids	Phenolic acids	C14H22O	205.16	189.13	206.167	[M-H]-	1	96-76-4	-	8.43436e+06	8.371e+06	8.35686e+06	8.56269e+06	8.48117e+06	8.00341e+06	8.24729e+06	7.80316e+06	7.14411e+06	7.14636e+06	7.19528e+06	8.18312e+06	7.51136e+06	7.11001e+06	8.0341e+06	4.39505e+06	4.66313e+06	4.47939e+06	-	-	-
MWSslk216	Sibiricose A5*	0	Phenolic acids	Phenolic acids	C22H30O14	517.16	175.04	518.164	[M-H]-	1	107912-97-0	-	200663	247128	190192	78361.9	88166.7	89644.9	119008	133589	126326	110319	125351	119089	122641	94085.2	94028.8	150990	158546	147199	-	CM02695	MetMap165
Hmbn002692	6'-O-Feruloyl-D-sucrose*	0	Phenolic acids	Phenolic acids	C22H30O14	517.16	175.04	518.164	[M-H]-	1	118230-77-6	-	170143	229793	167230	85026.9	84085.2	100672	107480	158817	129522	78102.8	122666	123920	110612	126355	85910.3	144381	139192	159523	-	CM02694	MetMap165
Rln002243	[(2R,3S,4S,5R,6S)-6-(4-acetylphenoxy)-3,4,5-trihydroxyoxan-2-yl]methyl (E)-3-(3,4,5-trimethoxyphenyl)prop-2-enoate	0	Phenolic acids	Phenolic acids	C26H30O11	517.17	193.05	518.179	[M-H]-	2	-	-	215016	170236	160374	67968.7	50179.7	61657.1	94863.3	87540.7	75494.3	88374.3	88155.7	95822.3	125985	114026	84273.3	105682	100533	123493	-	-	-
MWSmce085	Wedelolactone	0	Lignans and Coumarins	Coumarins	C16H10O7	313.04	298.02	314.043	[M-H]-	3	524-12-9	C10541	34654.4	25283.3	30152.7	49574.2	57050.2	56102.2	67272.2	55937.2	57485.9	72513.5	77330.3	79941	52411.8	55789.8	74394.8	62702.8	70019.6	61994.2	-	C10541	-
Zamn006847	glycoric acid	0	Others	Others	C12H20O4	227.13	183.14	228.136	[M-H]-	2	-	-	86798.4	99829.8	80002.4	77452.4	68236.2	78844.6	72977.4	81881.3	68930	75742.3	70450.9	63398.1	66615.9	68604.9	80557.9	79087.8	80865	73903	-	-	-
Ran03661	IAA-inositol	0	Alkaloids	Alkaloids	C16H19NO7	336.11	116.05	337.116	[M-H]-	2	-	-	739765	650008	606852	373050	346016	354568	494975	500955	532046	626056	570776	626228	253951	252865	248696	554717	497305	568824	-	-	-
Labn004625	2-Phenylethyl beta-primeveroside	0	Others	Alcohol compounds	C19H28O10	415.16	89.02	416.168	[M-H]-	2	129932-48-5	-	615513	371474	442692	195178	204942	297273	97491.1	94929.2	104248	362126	296274	301710	129904	106467	93828.6	232750	270697	234619	-	CM02885	MetMap172
mws0367	(9Z,12Z,15Z)-Octadecatrienoic acid*	0	Lipids	Free fatty acids	C18H30O2	277.22	277.22	278.225	[M-H]-	2	463-40-1	C06427	3.55385e+07	3.51932e+07	2.97792e+07	1.20346e+07	1.13325e+07	1.02184e+07	1.68728e+07	1.24356e+07	1.20181e+07	6.16524e+06	9.94089e+06	1.04184e+07	1.45466e+07	1.38965e+07	1.31358e+07	2.82131e+07	2.1443e+07	2.0849e+07	ko00592,ko01040,ko01100,ko01110	C06427	-
Lmbn005923	Crepenynate	0	Lipids	Free fatty acids	C18H30O2	277.22	59.01	278.225	[M-H]-	3	2277-31-8	C07289	85762	85098.9	72283.2	28550.9	23191.2	23838.9	37173.9	26176.8	28338	14723.4	22611.1	25511.6	32019.2	28616.2	30496.2	65276.5	52320.4	46285.7	ko00591	C07289	-
Wcsn010375	Methyl (4E,8E,11E)-5,9,13-trimethyltetradeca-4,8,11-trienoate	0	Others	Others	C18H30O2	277.22	59.01	278.225	[M-H]-	1	-	-	84599.3	84648.7	69323.4	25536.9	27778.2	24730.3	39675.3	32361.5	25356.6	12668.6	25503.7	28198.8	34617.3	29047.4	28474.6	65918.4	48642.5	43866	-	-	-
MWStz609	Piceatannol-3'-O-glucoside*	0	Others	Stilbene	C20H22O9	405.12	243.07	406.126	[M-H]-	2	94356-26-0	-	262093	230799	242234	127191	151785	147258	97631.6	123977	121384	396988	106971	128051	56497.4	217372	63242.3	129060	146016	159195	-	-	-
Wahln04020	Benzyl Alcohol Beta-D-Rutinoside	0	Others	Alcohol compounds	C19H28O10	475.18	269.1	416.168	[M+CH3COO]-	1	-	-	120366	172946	197176	215046	249981	226360	265288	313202	236187	235077	285471	297348	218989	342048	367003	265679	273259	245160	-	-	-
Zbqn002456	N-(3,4,5-trihydroxycinnamicacid)-alanine	0	Amino acids and derivatives	Amino acids and derivatives	C12H13NO6	266.07	88.04	267.074	[M-H]-	1	-	-	96272.9	100498	68173.5	123165	108499	124792	181068	147220	182574	136630	142290	164476	109986	132730	152182	142000	130311	131292	-	-	-
Lmbn005662	9(10)-EpOME	0	Lipids	Free fatty acids	C18H32O3	295.23	171.1	296.235	[M-H]-	1	16833-56-0	C14825	500458	529800	481405	365713	355978	351906	258231	248808	267338	228595	249873	254380	211558	229393	211695	312732	330863	318452	ko00591,ko01100	C14825	-
MWS2058	3-Methylsalicylate	0	Phenolic acids	Phenolic acids	C8H8O3	151.04	107.05	152.047	[M-H]-	3	83-40-9	C14088	55514.1	56072.4	45217.6	70431	64368.8	58549	70070.6	36271.9	65908.1	52638.6	57117.2	61130.3	70841.7	58271.5	71729.8	48297.5	45627.5	42746.4	-	C14088	MetMap158
Sasn009432	9,10-Dihydroxystearate	0	Lipids	Free fatty acids	C18H36O4	315.26	297.24	316.261	[M-H]-	1	-	C19622	60108.6	53847.6	51201.6	145158	150021	148595	122361	123628	128196	116770	120541	129758	109847	119443	113395	107213	112407	111717	ko00073	C19622	-
Zjbn102211	Gymnoside II*	0	Others	Others	C21H30O11	457.17	127.08	458.179	[M-H]-	2	-	-	274003	220094	243857	74383.4	53572.9	49622.7	101215	66067.8	82490.3	53601.1	40572	45187.3	108883	113166	85166.8	148921	104613	138254	-	-	-
Walbn08060	1-(((2-(dimethylamino)ethoxy)(hydroxy)phosphoryl)oxy)-3-hydroxypropan-2-yl (9Z,12Z)-octadeca-9,12-dienoate*	0	Lipids	LPE	C25H48NO7P	504.31	279.24	505.317	[M-H]-	1	-	-	1.36695e+06	1.21555e+06	1.07857e+06	765974	742547	830112	452956	407082	532202	311668	324141	267709	722795	596521	562148	848138	752858	849712	-	-	-
Wamxn04683	4,10-dioxo-10-(sulfooxy)decanoic acid	0	Others	Others	C10H16O8S	295.05	96.96	296.057	[M-H]-	1	-	-	407826	412089	361159	863255	790135	865936	865676	851927	835809	1.07047e+06	1.09818e+06	1.2003e+06	926859	1.04737e+06	951228	864164	792631	900767	-	-	-
Hmhn000927	Phloroglucinol-1-O-β-D-glucopyranoside	0	Others	Others	C12H16O8	287.08	125.02	288.084	[M-H]-	2	-	-	115971	119739	87114.4	217604	187200	198937	226705	240529	247776	187633	234706	268377	239932	288122	271908	195288	198023	197247	-	-	-
Safn000221	UDP-D-galactose	0	Nucleotides and derivatives	Nucleotides and derivatives	C15H24N2O17P2	565.05	323.03	566.055	[M-H]-	1	-	-	1.16668e+06	1.07671e+06	986146	853997	1.02199e+06	895744	929793	1.02939e+06	939918	937391	1.00558e+06	862348	851895	984156	886961	1.01876e+06	937743	992488	-	-	-
Zmfn007157	1,4-dihydroxy-7-methoxy-9,10-dihydro-phenanthrene	0	Quinones	PhenAnthraquinones	C15H14O3	241.09	198.07	242.094	[M-H]-	1	-	-	996725	751808	859788	493620	474215	460216	309477	293552	292201	596874	559010	613804	92482.5	95311.9	111271	506184	541095	477077	-	-	-
Lmqn000351	Rutinose	0	Others	Saccharides	C12H22O10	325.11	59.01	326.121	[M-H]-	3	90-74-4	C08247	680146	681381	699948	1.07472e+06	1.17265e+06	1.17649e+06	1.19625e+06	1.21425e+06	1.26763e+06	1.00331e+06	1.32427e+06	1.30823e+06	1.11271e+06	1.1139e+06	1.0461e+06	1.08545e+06	1.11402e+06	1.06613e+06	-	C08247	-
Zbjn003642	1-O-rhamnose-3-O-Caffeoyl Quinic Acid	0	Phenolic acids	Phenolic acids	C22H28O13	499.15	191.06	500.155	[M-H]-	2	-	-	112028	122127	90605.5	28135.2	27882.9	33774.9	57313.8	56475	47796.7	21604.4	23877	23908.8	37518	39900.8	35444.3	58620.8	58776.4	64844.2	-	-	-
ML10197929	Creatine	0	Amino acids and derivatives	Amino acids and derivatives	C4H9N3O2	130.09	88.04	131.07	[M-H]-	3	57-00-1	C00300	98083.9	68560.9	97361.9	101518	112905	90365.1	162370	151334	132798	135143	131282	179618	102526	125576	114519	117811	119948	111456	ko00260,ko00330,ko01100	C00300	-
mws1417	Indole-3-carboxylate*	0	Alkaloids	Plumerane	C9H7NO2	160.04	116.05	161.048	[M-H]-	3	771-50-6	C19837	7390.52	13883.4	17504.7	17966.5	26869.8	20630.4	22281.2	17955.7	20778.3	22630.2	14920.2	12630.5	32843.6	35412.6	35321	33726.1	34863.4	23664.2	-	C19837	-
Zbln008106	4,7-Dihydroxy-2-methoxy-9,10-dihydrophenanthrene*	0	Quinones	PhenAnthraquinones	C15H14O3	241.09	198.07	242.094	[M-H]-	1	87530-30-1	C10257	69565.6	65321.7	67748.4	45981.4	48688.5	62119.4	42015.4	33526.7	43445.5	44421.3	56821.9	60395.9	38738.8	28197.9	28764.3	49941.7	53004.8	52999.8	-	C10257	-
Wcsn010524	8,11-Heptadecadienoic acid	0	Lipids	Free fatty acids	C17H30O2	265.22	265.22	266.225	[M-H]-	1	-	-	94001.7	96563.8	81495.4	38088.3	46996.1	37658.6	19376.1	23025.8	19765.7	28254.3	29307.9	27888.2	21747.9	27571	26336.5	66956.5	62159.4	61281.1	-	-	-
Waln010743	1-(2,3-dihydroxypropoxy)-3-(((2-(dimethylamino)ethoxy)(hydroxy)phosphoryl)oxy)propan-2-yl (11Z,14Z)-octadeca-11,14-dienoate*	0	Lipids	LPE	C28H54NO9P	578.35	279.23	579.354	[M-H]-	1	-	-	2.8861e+06	2.82278e+06	2.44738e+06	1.93886e+06	1.95952e+06	1.90935e+06	1.12257e+06	1.09323e+06	1.01932e+06	660417	713584	732968	1.31281e+06	1.35683e+06	1.31004e+06	1.8332e+06	1.78848e+06	1.76428e+06	-	-	-
Hmsn002598	Salirepin	0	Others	Others	C13H18O8	301.09	139.04	302.1	[M-H]-	2	26652-12-0	-	146558	208315	202450	326596	255836	291918	392164	335847	368965	376403	399715	410704	289164	287612	317610	344417	283406	292279	-	CM02822	MetMap164
Zbln007359	2,7-dihydroxy-4-methoxyphenanthrene	0	Quinones	PhenAnthraquinones	C15H12O3	239.07	196.05	240.079	[M-H]-	1	130827-45-1	-	5.43635e+06	5.53428e+06	5.02253e+06	2.15549e+06	2.07033e+06	1.99405e+06	879101	857561	939008	1.29234e+06	1.26196e+06	1.36586e+06	160279	170525	168147	2.24084e+06	2.24817e+06	2.20856e+06	-	-	-
Jmyn002224	glucoacetosyringone	0	Others	Ketone compounds	C16H22O9	357.12	135.04	358.126	[M-H]-	2	86402-41-7	-	112688	105478	87907.3	85497.5	84951.1	74068.7	73802.8	64615.6	65555.3	54942.9	62283.5	67613.1	69301.5	82103.1	93470.6	88180.7	75908.3	78917.4	-	-	-
Zbln007777	Flavidin	0	Quinones	PhenAnthraquinones	C15H12O3	239.07	196.06	240.079	[M-H]-	3	83924-98-5	C10258	5.68359e+06	5.221e+06	4.79275e+06	1.90895e+06	1.99876e+06	2.02066e+06	818909	879248	853638	1.16522e+06	1.26256e+06	1.17832e+06	156380	180843	159199	2.2257e+06	2.24109e+06	2.20937e+06	-	C10258	-
Zmbn005821	3-hydroxy-5-methyl-3-(((3,4,6-trihydroxy-5-((4-hydroxybenzyl)oxy)tetrahydro-2H-pyran-2-yl)methoxy)carbonyl)hexanoic acid*	0	Others	Others	C21H30O11	457.17	127.08	458.179	[M-H]-	2	-	-	288576	219814	211864	68193.7	50250.4	46865.2	83595	89725.3	63010.6	46090.8	31303.5	39517.4	68972.9	114091	75646	118529	120547	120631	-	-	-
Lmln010063	2,6-Di-tert-butylphenol	0	Others	Others	C14H22O	205.16	189.13	206.167	[M-H]-	3	128-39-2	-	8.09734e+06	8.41329e+06	8.37856e+06	8.51156e+06	8.03179e+06	7.85497e+06	8.25637e+06	7.64409e+06	7.12336e+06	6.76692e+06	7.46464e+06	8.2806e+06	7.45114e+06	7.05296e+06	7.68433e+06	4.34942e+06	4.70173e+06	4.48307e+06	-	-	-
Wcfn008410	1,3-Dihydroxyanthraquinone (Xanthopurpurin)	0	Quinones	Anthraquinone	C14H8O4	239.03	211.04	240.042	[M-H]-	3	518-83-2	-	206948	204635	203387	62072.6	72157.6	82380.1	31900.9	46818	57137.1	109702	116859	92830.3	55715.4	64841.3	42596	164996	143828	146742	-	-	-
mws0248	Uridine	0	Nucleotides and derivatives	Nucleotides and derivatives	C9H12N2O6	243.06	110.02	244.07	[M-H]-	3	58-96-8	C00299	19599.2	16243.5	15531.9	7761.76	12916.9	10880.7	8435.53	17990.9	16016.8	11923.1	9017.28	6914.34	7202.89	15218.8	8730.75	14806.6	17024.6	15395.6	ko00240,ko01100,ko01232,ko02010	C00299	-
Zmfn007881	3,4-dihydroxy-2,7-dimethoxyphenanthrene	0	Quinones	PhenAnthraquinones	C16H14O4	269.08	226.07	270.089	[M-H]-	3	-	-	1.08209e+06	1.09133e+06	1.22839e+06	414962	494659	574018	364490	349916	378624	394506	584804	543157	40681	54852.1	36432.3	516023	464060	434472	-	CM02182	MetMap162
Waln011009	2-(2,3-dihydroxypropoxy)-3-(((2-(dimethylamino)ethoxy)(hydroxy)phosphoryl)oxy)propyl (11Z,14Z)-octadeca-11,14-dienoate*	0	Lipids	LPE	C28H54NO9P	578.34	279.23	579.354	[M-H]-	1	-	-	2.81327e+06	2.9012e+06	2.42952e+06	1.95584e+06	1.82902e+06	1.88312e+06	1.08839e+06	1.09093e+06	1.08594e+06	682509	692990	740463	1.3215e+06	1.40716e+06	1.31046e+06	1.8939e+06	1.80844e+06	1.80753e+06	-	-	-
WaYn011606	1-(2,3-dihydroxypropoxy)-3-(((2-(dimethylamino)ethoxy)(hydroxy)phosphoryl)oxy)propan-2-yl heptadecanoate	0	Lipids	LPE	C27H56NO9P	568.36	269.25	569.369	[M-H]-	1	-	-	55529.5	51267	41865	31814.2	31002.2	29001.1	29253.3	34465.8	23303.1	33118.5	37139.1	31591.8	24334.8	21865.1	20525	35400.3	38960	40983.7	-	-	-
pme0534	D-Gluconic acid	0	Others	Saccharides	C6H12O7	195.05	75.01	196.058	[M-H]-	1	526-95-4	C00257	649705	666663	727345	784644	747047	897496	915533	940770	1.00901e+06	624801	709503	696650	839647	784228	748745	788140	806975	730786	ko00030,ko01100,ko01110,ko01200	C00257	-
Walbn08189	3-(((2-(dimethylamino)ethoxy)(hydroxy)phosphoryl)oxy)-2-hydroxypropyl (9Z,12Z)-octadeca-9,12-dienoate*	0	Lipids	LPE	C25H48NO7P	504.31	279.23	505.317	[M-H]-	1	-	-	1.34609e+06	1.17144e+06	1.04658e+06	687547	805265	742318	436312	399130	494153	255449	265359	267755	516797	476359	480522	721141	742818	838367	-	-	-
pmb3142	Salicylic acid-2-O-glucoside*	0	Phenolic acids	Phenolic acids	C13H16O8	299.08	137.02	300.084	[M-H]-	2	10366-91-3	-	3.64513e+06	3.26824e+06	3.05138e+06	2.25865e+06	2.23799e+06	2.31812e+06	2.28776e+06	2.43547e+06	2.4316e+06	2.71001e+06	2.73516e+06	2.9615e+06	2.69988e+06	2.73969e+06	2.39203e+06	2.78378e+06	2.81199e+06	2.68285e+06	-	CM02419	MetMap158
Lmbn001930	Salicylaldehyde	0	Others	Aldehyde compounds	C7H6O2	121.03	77.04	122.037	[M-H]-	3	90-02-8	C06202	84248.4	109055	128492	93015.5	84188.4	116657	74909.4	55727.7	73244	114834	165864	80473.5	74016	83754.3	78659.1	61162.4	69720.9	89324.8	ko01100	C06202	MetMap164
Hmjn002715	Coelovirin A	0	Phenolic acids	Phenolic acids	C21H30O12	473.17	115.08	474.174	[M-H]-	1	452963-01-8	-	3.22061e+06	2.84887e+06	2.52062e+06	3.44663e+06	4.10555e+06	3.95729e+06	3.86879e+06	3.0655e+06	3.43518e+06	3.22878e+06	4.17905e+06	4.20415e+06	3.54208e+06	4.11045e+06	3.95838e+06	3.31237e+06	3.41592e+06	3.5846e+06	-	CM02853	MetMap164
pmn001420	1-Caffeoyl-beta-D-glucose*	0	Phenolic acids	Phenolic acids	C15H18O9	341.09	179.04	342.095	[M-H]-	1	14364-08-0	C10433	8.43748e+06	8.26506e+06	8.45681e+06	3.22591e+06	3.63683e+06	3.59904e+06	3.9766e+06	3.83307e+06	3.14309e+06	4.98136e+06	4.7114e+06	4.6289e+06	3.99671e+06	4.36864e+06	4.05239e+06	5.46797e+06	5.08079e+06	5.32065e+06	-	C10433	MetMap166,MetMap168,MetMap169
Safn002774	Chaenorrhinoside	0	Others	Others	C15H18O9	341.09	179.04	342.095	[M-H]-	3	-	-	6.30186e+06	6.33469e+06	6.4687e+06	2.48097e+06	2.35485e+06	2.48624e+06	2.60614e+06	2.85629e+06	2.702e+06	3.28212e+06	3.50895e+06	3.32532e+06	2.93268e+06	3.2071e+06	2.80831e+06	3.97429e+06	4.08383e+06	3.77388e+06	-	-	-
mws0906	Coniferin	0	Others	Alcohol compounds	C16H22O8	341.12	179.07	342.132	[M-H]-	2	531-29-3	C00761	7.49295e+06	8.5032e+06	8.43418e+06	3.12356e+06	3.47515e+06	3.51409e+06	4.06187e+06	3.35871e+06	3.29223e+06	4.16775e+06	4.50539e+06	4.56538e+06	3.62812e+06	3.86083e+06	3.68895e+06	5.55819e+06	5.36581e+06	5.17598e+06	ko00940,ko01110	C00761	-
Lman002731	Grevilloside F	0	Phenolic acids	Phenolic acids	C15H18O9	341.09	135.04	342.095	[M-H]-	2	1094004-50-8	-	3.6337e+06	3.66243e+06	4.09774e+06	1.45314e+06	1.8379e+06	1.56531e+06	1.54446e+06	1.60243e+06	1.61159e+06	1.92922e+06	2.41836e+06	2.2286e+06	1.64813e+06	1.79455e+06	1.84376e+06	2.35181e+06	2.72345e+06	2.67318e+06	-	-	-
Zmbn005827	1-(4-hydroxybenzyl) 4-(4-(((2S,3R,4S,5S,6R)-3,4,5-trihydroxy-6-(hydroxymethyl)tetrahydro-2H-pyran-2-yl)oxy)benzyl) (R)-2-isobutyl-2-(((2S,3R,4S,5S,6R)-3,4,5-trihydroxy-6-(hydroxymethyl)tetrahydro-2H-pyran-2-yl)oxy)succinate	0	Others	Others	C34H46O17	725.27	457.17	726.274	[M-H]-	2	-	-	1.04771e+06	1.00197e+06	919876	252866	294196	235214	398926	415287	367101	188678	226045	218723	508483	457618	552206	572473	555546	575413	-	-	-
MWSprf135	(15Z)-Tetracosenoic acid	0	Lipids	Free fatty acids	C24H46O2	365.34	283.26	366.35	[M-H]-	3	506-37-6	C08323	206251	82699	182798	136710	137903	152300	85197.9	140189	117822	91543.4	83149.2	80312.2	82457.2	77399.2	107024	145175	171784	160907	ko01040	C08323	-
mws0366	(6Z,9Z,12Z)-Octadecatrienoic acid*	0	Lipids	Free fatty acids	C18H30O2	277.22	277.22	278.225	[M-H]-	2	506-26-3	C06426	4.09645e+07	4.17866e+07	3.33545e+07	1.36943e+07	1.32852e+07	1.18077e+07	2.04267e+07	1.43909e+07	1.41383e+07	7.24849e+06	1.19555e+07	1.2402e+07	1.70461e+07	1.58464e+07	1.62333e+07	3.2015e+07	2.5406e+07	2.44193e+07	ko00591,ko01040,ko01100	C06426	-
MWSmce057	Alizarin*	0	Quinones	Anthraquinone	C14H8O4	239.04	211.04	240.042	[M-H]-	1	72-48-0	C01474	206681	222223	208110	62458.8	78005.7	72363.9	33117.5	45262.1	59056.6	99418.9	111646	100859	62142.8	76084.7	39378.7	146504	147292	128927	-	C01474	-
pme3311	D-Fructose 1,6-bisphosphate	0	Others	Saccharides	C6H14O12P2	338.99	96.97	339.996	[M-H]-	3	488-69-7	C00354	39585.5	43594.4	44185.4	47887.4	41280.1	57866.1	59378.6	61013.4	68136	67217.9	58797.3	81109.2	50020.1	60907.6	46104.2	67561.2	48352.1	34909.8	ko00010,ko00030,ko00051,ko00400,ko00710,ko01100,ko01110,ko01200,ko01230	C00354	-
Waln006120	Octyl 6-O-Alpha-L-Arabinopyranosyl-Beta-D-Glucopyranoside	0	Others	Alcohol compounds	C19H36O10	423.22	291.18	424.231	[M-H]-	1	168288-07-1	-	303001	304923	280754	188142	169775	216432	109197	111932	107603	297786	297449	302417	210193	196146	200924	227703	237000	232412	-	-	-
MWS1877	4-tert-Octylphenol	0	Others	Others	C14H22O	205.16	133.06	206.167	[M-H]-	2	140-66-9	C14205	64701.5	67421.2	69030.8	66917.9	66313.6	59866.4	62499	62513	57107.2	57577.7	56690.7	69539.2	60411.7	53416.9	61985.6	32310.9	37604	33132.3	-	C14205	-
pme0282	Phthalate	0	Phenolic acids	Phenolic acids	C8H6O4	165.02	77.04	166.027	[M-H]-	1	88-99-3	C01606	130337	122327	192511	93061.1	89074.6	111078	103796	102171	95094.4	135342	160628	147352	98748.8	118533	107715	76818.8	109744	95006.2	ko01100,ko02010	C01606	MetMap157
Zbfn003643	Kelampayoside A[3,4,5-Trimethoxyphenol-β-D-apiosyl-(1→6)-β-D-glucoside]	0	Phenolic acids	Phenolic acids	C20H30O13	477.16	293.09	478.169	[M-H]-	3	87562-76-3	-	20520.1	30017.1	23289.5	39486.5	36970.8	40534.4	49957.7	36668.9	34534.9	37808.6	38994.1	37397.4	36449.9	54793.6	38244.9	47353.5	38975.6	45669	-	-	-
Zmhn001420	5,7-Dihydroxy-1(3H)-isobenzofuranone	0	Others	Lactones	C8H6O4	165.02	121.03	166.027	[M-H]-	3	27979-58-4	-	702037	638950	2.07105e+06	603437	673923	768348	605000	498892	476503	1.01767e+06	1.11524e+06	734525	519861	302752	344770	300382	303751	347911	-	-	-
Lmbn001609	(S)-2-Aceto-2-hydroxybutanoate	0	Organic acids	Organic acids	C6H10O4	145.05	83.05	146.058	[M-H]-	3	-	C06006	44640.6	46336.6	40456.3	56603.3	50515.4	50157.6	69689.8	57294	58515.5	67699.7	57617.3	82766.2	52001.7	86539.2	59392.9	42139.6	31684.7	44692.5	ko00290,ko01100,ko01110,ko01210,ko01230	C06006	-
ML10172161	Hydroxypyruvate*	0	Organic acids	Organic acids	C3H4O4	103	59.01	104.011	[M-H]-	3	1113-60-6	C00168	40250.7	57235.1	57459.2	30417.6	33577.7	32045.9	34430.5	26669.3	44657.5	22276.5	37074.4	22223.1	35324.7	30884.6	24217	38283.8	35252.6	37240.3	ko00260,ko00630,ko01100,ko01110,ko01200	C00168	-
MWS0952	Sphinganine 1-phosphate	0	Lipids	Sphingolipids	C18H40NO5P	380.26	78.96	381.264	[M-H]-	3	19794-97-9	C01120	9237.09	10180.5	11553.1	6487.07	11645.5	9774.43	7611.56	7567.94	6177.75	5321.51	6649.08	6381.74	9674.56	8282.4	7031.29	10189.1	12212.7	7066.81	ko00600,ko01100	C01120	-
mws2104	D-Pinitol*	0	Others	Saccharides	C7H14O6	193.07	59.01	194.079	[M-H]-	3	10284-63-6	C03844	192320	171136	190713	166696	146028	167484	83391.3	136622	76383.5	72157.9	148111	147143	151955	152223	106690	79683.3	178613	152365	-	C03844	-
pme2746	FAD	0	Nucleotides and derivatives	Nucleotides and derivatives	C27H33N9O15P2	784.15	437.09	785.157	[M-H]-	1	146-14-5	C00016	461914	326876	305447	291934	292557	267590	273938	279442	286115	192964	348544	384474	360116	323062	325667	401304	347838	404644	ko00740,ko01100,ko01110,ko01240	C00016	-
Wamxn01040	(X)-1,2-Propanediol 1-O-B-D-Glucopyranoside	0	Others	Alcohol compounds	C9H18O7	297.12	59.01	238.105	[M+CH3COO]-	1	-	-	947914	981506	833009	1.10308e+06	1.16038e+06	1.18612e+06	1.67077e+06	1.69309e+06	1.77523e+06	1.48934e+06	1.6185e+06	1.64824e+06	1.35307e+06	1.65965e+06	1.41227e+06	1.37993e+06	1.35485e+06	1.45501e+06	-	-	-
Rfn03563	5-methoxycarbonylpentyl alpha-D-mannopyranoside	0	Others	Others	C13H24O8	307.14	145.09	308.147	[M-H]-	1	-	-	413811	360243	369341	463215	482371	543574	571920	593091	563630	504206	564121	600475	455516	572775	437639	481093	510017	501845	-	-	-
Safn005200	Supinenolone D	0	Terpenoids	Triterpene	C30H44O3	511.35	451.33	452.329	[M+CH3COOH-H]-	3	-	-	5.95784e+06	7.39472e+06	7.16776e+06	1.21236e+07	9.43047e+06	1.06046e+07	1.03233e+07	1.08115e+07	1.07968e+07	8.17658e+06	1.11077e+07	1.21466e+07	9.27631e+06	9.80099e+06	7.16166e+06	3.31991e+06	3.21874e+06	3.15928e+06	-	-	-
MWSmce466	4'-Hydroxyacetophenone*	0	Others	Ketone compounds	C8H8O2	135.05	92.03	136.052	[M-H]-	3	99-93-4	C10700	293480	315561	293329	98253.6	110789	135219	101363	165244	92351.1	95645.1	62396.4	109332	206131	139414	181808	167324	168332	162512	ko01100	C10700	MetMap164
Walbn00444	6''-Carboxyraffinose	0	Others	Saccharides	C18H30O17	517.14	175.02	518.148	[M-H]-	2	104880-42-4	-	508145	430714	432424	162716	161887	157506	209883	217143	235828	160260	210879	198539	100011	81665.1	74841.5	246377	278796	214031	-	-	-
Wcsn011332	Ethyl (10Z,13Z)-hexadeca-10,13-dienoate	0	Others	Others	C18H32O2	279.23	261.23	280.24	[M-H]-	1	-	-	115240	109913	101956	74000	69703.6	70635.9	64804.1	62878.8	66587	54163.4	58663.6	51152.4	61145.2	55855.2	57694.6	84494.4	99232	93813.9	-	-	-
Lmbn006152	Rumenic acid	0	Lipids	Free fatty acids	C18H32O2	279.23	59.01	280.24	[M-H]-	1	2540-56-9	C04056	37142.6	37016.6	35141.2	22905.9	23220.4	24120.9	20539.7	20995.9	21191.4	18997.2	20283.8	19850.9	19084.8	19017.1	19809.4	27983.9	29424.8	32877.6	ko00591	C04056	-
Qahn004089	Magnoloside D	0	Phenolic acids	Phenolic acids	C29H36O15	623.19	461.17	624.205	[M-H]-	2	1418309-03-1	-	163545	217793	201219	68849.5	46792.1	60082.7	83185.1	76091.3	48819	53288.2	64325.3	72499.9	30502.2	34612.6	31010.7	102157	110351	104410	-	-	-
mws1038	Pantetheine	0	Alkaloids	Alkaloids	C11H22N2O4S	277.12	146.08	278.13	[M-H]-	1	496-65-1	C00831	357184	313606	231655	151871	147007	143234	145603	118852	137069	84025.1	97253.8	103572	128467	89382.9	95500.3	144724	165374	120568	ko00770,ko01100,ko01110	C00831	-
pme2768	PQQ	0	Alkaloids	Quinoline alkaloids	C14H6N2O8	329.01	241.02	330.012	[M-H]-	3	72909-34-3	C00113	519115	706584	684120	119080	122308	128805	119349	96676.7	130415	68606.8	105373	73781	143321	126083	118804	213400	266691	292739	-	C00113	-
mws4134	Glutathione disulfide	0	Amino acids and derivatives	Amino acids and derivatives	C20H32N6O12S2	611.14	306.08	612.152	[M-H]-	3	27025-41-8	C00127	438499	586402	302136	344366	342349	335686	316636	328451	272547	404995	321373	364220	304131	383994	311154	460598	474052	417128	ko00480,ko01100,ko01240	C00127	-
Lmyn012331	(6Z)-Octadecenoic acid*	0	Lipids	Free fatty acids	C18H34O2	281.25	281.25	282.256	[M-H]-	1	593-39-5	C08363	1.70526e+06	1.68705e+06	1.45302e+06	879942	815135	865747	721220	723148	741471	885463	1.08589e+06	888639	971734	1.01901e+06	1.02424e+06	1.5204e+06	1.3607e+06	1.57554e+06	-	C08363	-
mws2623	cis-Vaccenic acid*	0	Lipids	Free fatty acids	C18H34O2	281.25	281.25	282.256	[M-H]-	1	506-17-2	C21944	1.67797e+06	1.67423e+06	1.44817e+06	885433	805167	857835	699316	711602	738436	853486	936509	899284	1.00349e+06	1.01903e+06	1.04747e+06	1.5635e+06	1.34279e+06	1.58413e+06	-	C21944	-
pmn001610	Icosadienoic acid*	0	Lipids	Free fatty acids	C20H36O2	307.26	307.26	308.272	[M-H]-	1	5598-38-9	C16525	220060	129862	122529	60298	49347.8	46860.5	54605	40608.5	38671.7	43980.3	55808.3	41371.8	66349.7	62738.2	53694.2	171778	90189.4	123581	ko01040	C16525	-
Zasn010433	Linolelaidic acid ethyl ester*	0	Lipids	Free fatty acids	C20H36O2	307.26	307.26	308.272	[M-H]-	1	544-35-4	-	56253.1	33084.3	38304.5	15158.4	16452	12449.4	15368.2	9508.21	14087.7	9272.22	13701.5	10118	11405.7	14728.4	15218.8	46497.2	29818.6	35119.5	-	-	-
ZbWn003804	8-(methoxymethoxy)decyl hydrogen sulfate	0	Others	Others	C12H26O6S	297.14	96.96	298.145	[M-H]-	3	-	-	569563	520222	459832	1.05449e+06	1.10615e+06	1.06404e+06	1.12538e+06	1.13261e+06	1.21602e+06	1.47001e+06	1.47373e+06	1.56651e+06	1.24726e+06	1.36054e+06	1.29292e+06	1.17698e+06	1.09058e+06	1.18373e+06	-	-	-
Saln001588	8-O-Acetylmussaenoside	0	Terpenoids	Monoterpenoids	C19H28O11	431.15	59.01	432.163	[M-H]-	1	-	-	42278.9	61454.6	62501.8	84498.4	50987.8	83365.9	94056.4	71266	98825.2	61635.8	74439.9	61193.7	44248.3	113428	83584.8	89175.6	93444.5	64550.8	-	-	-
Zmhn002334	6-O-Feruloyl-glucose	0	Phenolic acids	Phenolic acids	C16H20O9	355.1	193.05	356.111	[M-H]-	1	137887-25-3	-	152633	155029	161644	81764.8	95623.7	84199.4	73967.2	67734.2	56367.5	157316	136636	132746	63479.2	68380.8	72782.7	111718	122452	144515	-	CM02668	MetMap165,MetMap168,MetMap169
Rln0018	3-Methoxybenzaldehyde*	0	Others	Aldehyde compounds	C8H8O2	135.04	92.03	136.052	[M-H]-	3	591-31-1	-	311063	346316	345679	116305	85992.5	128118	119503	144218	102904	99698.4	73758.8	113147	223787	151500	177601	183788	179045	196738	-	-	-
Wafn003070	Hydroxyferulic acid glucoside	0	Phenolic acids	Phenolic acids	C16H20O10	371.1	209.05	372.106	[M-H]-	2	-	-	1.966e+06	1.4934e+06	1.44408e+06	526459	574673	622640	85659.2	67260.4	69951.8	568256	630667	527208	268875	169616	193130	630576	689355	700317	-	CM02676	MetMap165,MetMap166,MetMap168
Lmhn002051	Vnilloylmalic acid	0	Phenolic acids	Phenolic acids	C12H12O8	283.05	167.04	284.053	[M-H]-	3	-	-	444548	296675	334849	257688	230126	256327	291855	236439	250296	377929	315956	349575	284469	322637	310816	297466	294467	299244	-	CM02527	MetMap160
Wasyqn0468	L-Glutamyl-L-Cysteinyl-Glycine	0	Amino acids and derivatives	Amino acids and derivatives	C10H17N3O6S	306.08	143.05	307.084	[M-H]-	1	-	-	6.05037e+06	7.54839e+06	7.40523e+06	6.06374e+06	6.98577e+06	7.87576e+06	7.1193e+06	5.68032e+06	4.4905e+06	2.79532e+06	5.43179e+06	7.55718e+06	5.83874e+06	5.59195e+06	5.50503e+06	6.98882e+06	4.52681e+06	6.20656e+06	-	-	-
Lmmn000214	Solatriose	0	Others	Saccharides	C18H32O15	487.17	341.11	488.174	[M-H]-	3	528-40-5	-	72125.2	58718.9	38670.3	21618.3	34802.7	23182.1	25845.3	14032.5	23704.5	10335.5	18281.7	12301.2	23866.4	18976	39600.9	38289	34433.1	30288.3	-	-	-
Wbtn002952	1-(β-D-Glucopyranosyl)-3-ethyl-4-methyl-1H-pyrrole-2,5-dione	0	Others	Ketone compounds	C13H19NO7	300.11	138.06	301.116	[M-H]-	1	-	-	2.14422e+06	1.92487e+06	2.14148e+06	2.92405e+06	2.7691e+06	2.65733e+06	3.29848e+06	3.39164e+06	3.54464e+06	3.68098e+06	3.70167e+06	3.93988e+06	2.82942e+06	2.94216e+06	2.74256e+06	2.86508e+06	2.84527e+06	2.80514e+06	-	-	-
Zbqn002320	(4-(2-oxopropoxy)phenyl)-L-alanine	0	Amino acids and derivatives	Amino acids and derivatives	C12H15NO4	236.09	88.04	237.1	[M-H]-	1	-	-	12527.3	20516	19554.4	25601.5	27435.5	17911.8	24451.7	31069.8	28172.8	19114.1	18747.1	27304.4	18337.8	21536.8	24882.2	20920.5	21862.3	23132.6	-	-	-
Yajn003916	(1S,4aS,7aR)-7-(3-hydroxybutyl)-4-((((2R,3R,4S,5S,6R)-3,4,5-trihydroxy-6-(hydroxymethyl)tetrahydro-2H-pyran-2-yl)oxy)methyl)-1,4a,5,6,7,7a-hexahydrocyclopenta[c]pyran-1-yl acetate	0	Terpenoids	Monoterpenoids	C21H34O10	445.21	59.01	446.215	[M-H]-	2	-	-	1.1556e+06	1.15558e+06	1.07865e+06	1.45083e+06	1.24475e+06	1.33706e+06	1.45657e+06	1.41169e+06	1.60329e+06	1.5188e+06	1.54258e+06	1.56347e+06	1.5451e+06	1.46065e+06	1.47826e+06	1.25785e+06	1.48296e+06	1.27413e+06	-	-	-
Lcfn121162	D-Ribulose 1,5-bisphosphate	0	Organic acids	Organic acids	C5H12O11P2	308.98	96.97	309.986	[M-H]-	3	24218-00-6	C01182	897161	1.01433e+06	889407	262428	267412	259174	219765	208374	205995	171377	193041	179734	43661.3	47749.5	45157.2	388759	374477	392686	ko00030,ko00630,ko00710,ko01100,ko01110,ko01200	C01182	-
Zmyn000155	N-Acetylornithine	0	Amino acids and derivatives	Amino acids and derivatives	C7H14N2O3	173.11	131.08	174.1	[M-H]-	2	6205-08-9	C00437	5.25546e+06	3.93726e+06	4.31192e+06	1.12344e+06	1.28191e+06	1.23457e+06	1.11368e+06	997087	1.23033e+06	851384	798566	785360	135121	109094	115080	1.92224e+06	1.74003e+06	1.69876e+06	ko00220,ko01100,ko01110,ko01210,ko01230	C00437	-
pme3186	Glyceraldehyde 3-phosphate	0	Organic acids	Organic acids	C3H7O6P	168.99	78.96	169.998	[M-H]-	3	591-59-3	C00661	74472.8	86107.8	93656.5	132607	92285.9	92339.9	148886	120655	128758	89842.2	106948	99003.6	125137	102148	118683	120191	114899	84570.9	-	C00661	-
Zmyn002975	3-Feruloyl-sucrose	0	Phenolic acids	Phenolic acids	C22H30O14	517.16	175.04	518.164	[M-H]-	1	-	-	170525	180986	146812	84602.6	80844	85335.6	91848.4	90861.8	90266.8	133434	138128	153482	123140	149231	99628.8	139203	127477	132132	-	-	-
Lmbn004240	9,10-Dihydroxy-12,13-epoxyoctadecanoate	0	Lipids	Free fatty acids	C18H34O5	329.23	199.13	330.241	[M-H]-	2	-	C14837	28944.2	28239	26223.4	148042	152279	144005	154471	151699	160575	65854.4	92399.3	91923.3	74574.5	88145.5	92535.5	104319	91211	90977.4	ko00591	C14837	-
pmb2795	4-Methoxycinnamic acid	0	Phenolic acids	Phenolic acids	C10H10O3	177.06	133.07	178.063	[M-H]-	3	830-09-1	-	36694.8	38432.5	50841.8	37633.4	29580.9	42044.8	39282.1	26467.6	29504	24963.2	27234.7	31018.9	32180.3	23927.7	34271.9	16464.3	12863.8	18599.8	-	CM02606	MetMap170
pmn001399	2,4,6,4'-Tetrahydroxy-stilbene-2-O-glucoside*	0	Others	Stilbene	C20H22O9	405.12	243.07	406.126	[M-H]-	2	-	-	243371	220175	202279	155503	151688	144024	98398.5	116187	88190.3	376473	124785	117227	68800.6	183720	55253.9	123495	122184	135004	-	-	-
Rfmb26201	Syringaresinol-4'-O-(6''-acetyl)glucoside	0	Lignans and Coumarins	Lignans	C30H38O14	621.22	417.16	622.226	[M-H]-	3	-	-	21515.4	22014.4	25770	41139.6	36433.9	38237.1	35708.6	34857.2	30329.6	24815.8	32581.9	37249.2	41392	34485	36219.6	33478.6	30841.3	30491.3	-	-	-
mws0943	N1-Methyl-4-pyridone-5-carboxamide	0	Alkaloids	Pyridine alkaloids	C7H8N2O2	151.05	71.01	152.059	[M-H]-	3	769-49-3	C05843	20606.1	16178.3	26669.7	45766.3	38408.2	39987	43815.2	39552	44336.1	23434.9	35007.4	30957.7	34310.2	33573.3	34158.2	23135.2	26027.6	35388.2	ko00760,ko01100	C05843	-
Zbsn004080	Kakispyrone	0	Others	Others	C19H20O9	391.1	229.05	392.111	[M-H]-	3	-	-	74862.3	99862.5	78189	22577.9	27317.5	29521.2	18644.1	15057	16209.9	46369.5	44920.4	43127	29278.9	27787.7	28468.9	48069.2	51847.2	44905	-	-	-
Cmbn003996	Regaloside G	0	Phenolic acids	Phenolic acids	C19H26O11	429.14	193.05	430.147	[M-H]-	3	120601-64-1	-	56177.6	62410.7	55273.2	35401	44777.2	48090.4	23218.8	29653.7	31728.8	54279.3	49448	61929.2	36921.1	46304.8	47915	34254.3	38829	55069.7	-	-	-
Wasyqn2417	Homomevalonic Acid Glucoside	0	Organic acids	Organic acids	C13H24O9	323.14	59.02	324.142	[M-H]-	1	-	-	2.27234e+06	4.74769e+06	5.37012e+06	4.61663e+06	5.83246e+06	5.09295e+06	5.03862e+06	5.55964e+06	6.02628e+06	4.23758e+06	4.30294e+06	4.8848e+06	4.95151e+06	4.51515e+06	4.80823e+06	4.72533e+06	4.82242e+06	4.70092e+06	-	-	-
Lacn006236	Malonyl salidroside	0	Phenolic acids	Phenolic acids	C17H22O10	385.11	137.02	386.121	[M-H]-	2	-	-	10982.8	9731.63	10437.2	23754.4	20637.6	30252.1	12029.2	24595	25409.1	24181.8	21120	17164.7	23597.3	10922.9	21365.4	25493.9	16520.3	25044.4	-	CM02884	MetMap172
Wasn003821	Glucosyl 3,7-dimethyloct-2-ene-1,6,7-triol	0	Terpenoids	Monoterpenoids	C16H30O8	409.21	187.13	350.194	[M+CH3COOH-H]-	1	-	-	27064.6	25810	26635.3	54339.7	28851.5	41796.9	106153	81421.8	78023.9	73959.2	64353.7	73241.4	60434.8	57748.3	52213.3	68413.2	73599	54045.5	-	-	-
Wamxn03015	Cymarose glucoside*	0	Others	Aldehyde compounds	C13H24O9	323.14	59.01	324.142	[M-H]-	2	-	-	703148	550721	480091	968137	1.332e+06	1.47758e+06	1.26742e+06	1.01835e+06	864435	1.28103e+06	1.0503e+06	1.19263e+06	874536	1.20612e+06	1.15198e+06	755217	1.00822e+06	1.29531e+06	-	-	-
Wahln11065	Irone	0	Terpenoids	Monoterpenoids	C14H22O	205.16	189.13	206.167	[M-H]-	2	-	-	8.36157e+06	8.24748e+06	8.28671e+06	8.52472e+06	8.29713e+06	8.01557e+06	8.3573e+06	7.75222e+06	7.00785e+06	6.82349e+06	7.32729e+06	8.35313e+06	7.60411e+06	7.18739e+06	7.73397e+06	4.27514e+06	4.6341e+06	4.46213e+06	-	-	-
Zbln007843	4-methoxyphenanthrene-2,3,6,7-tetrol	0	Quinones	PhenAnthraquinones	C15H12O5	271.06	211.04	272.068	[M-H]-	3	-	-	15697.5	9491.15	17114.5	39812.6	42242.1	45034.1	36159.8	42041.6	35773.8	38302	29069.5	38390.3	32777.4	32472.6	22923.5	30952	28775.2	24073.3	-	CM02192	MetMap162
Rfn0110118	Phomolide G	0	Others	Others	C12H20O5	243.12	181.12	244.131	[M-H]-	2	-	-	10951.1	7602.86	14391.2	26407.3	18480.4	19029.8	23883.1	26691.3	24662.3	20817.6	19244.3	19649.8	24324.7	21296.9	25316.4	19210.8	15017	12478.4	-	-	-
mws1090	D-Glucose 1-phosphate*	0	Others	Saccharides	C6H13O9P	259.02	96.97	260.03	[M-H]-	1	59-56-3	C00103	2.05936e+06	2.26287e+06	2.00475e+06	1.36464e+06	1.43742e+06	1.39573e+06	1.47677e+06	1.53735e+06	1.56572e+06	1.30487e+06	1.24876e+06	1.27649e+06	1.39853e+06	1.39133e+06	1.50415e+06	1.67631e+06	1.74174e+06	1.69018e+06	ko00010,ko00040,ko00052,ko00500,ko00520,ko00561,ko01100,ko01110,ko01240,ko01250	C00103	-
Rsn000556	glucose 3-phosphate*	0	Others	Saccharides	C6H13O9P	259.02	96.97	260.03	[M-H]-	1	-	-	1.98403e+06	2.1092e+06	1.84616e+06	1.36055e+06	1.36979e+06	1.47261e+06	1.49918e+06	1.44212e+06	1.48602e+06	1.1898e+06	1.4476e+06	1.33616e+06	1.39474e+06	1.38308e+06	1.43479e+06	1.65656e+06	1.63782e+06	1.65849e+06	-	-	-
mws0866	D-Glucose 6-phosphate*	0	Others	Saccharides	C6H13O9P	259.02	96.97	260.03	[M-H]-	1	56-73-5	C00092	1.88438e+06	2.07901e+06	1.84394e+06	1.30622e+06	1.40271e+06	1.3935e+06	1.38647e+06	1.33468e+06	1.21373e+06	1.13881e+06	1.20599e+06	1.16715e+06	1.49108e+06	1.29569e+06	1.23862e+06	1.58794e+06	1.40642e+06	1.75006e+06	ko00500,ko00562,ko01100,ko01110	C00092	-
Zmyn000083	alpha-D-Glucose 1,6-bisphosphate	0	Others	Saccharides	C6H14O12P2	338.99	78.96	339.996	[M-H]-	3	10139-18-1	C01231	12348.5	17118.4	10697.7	45671.8	34663.5	45646.8	51118	25424.1	46685.5	28574.7	41932.1	33846.5	44158.8	38980.1	47393.9	41090.9	29326.2	40019.9	ko00500,ko01100	C01231	-
Zmzn000078	Glycerone phosphate	0	Others	Ketone compounds	C3H7O6P	168.99	78.96	169.998	[M-H]-	3	57-04-5	C00111	17476.9	24417.1	22891.3	47207.2	51842.3	59192.7	62495	61466.6	48329.2	34398.7	53011.7	57788.6	54676	54718.3	61834.4	48841.9	46063.2	47258.4	ko00010,ko00040,ko00051,ko00052,ko00561,ko00562,ko00564,ko00630,ko00640,ko00710,ko00760,ko01100,ko01110,ko01200,ko01230	C00111	-
pme2914	3-Hydroxy-3-methylglutarate	0	Organic acids	Organic acids	C6H10O5	161.05	99.05	162.053	[M-H]-	2	503-49-1	C03761	52153.6	98966.6	70436.4	116876	104357	67950	65189.7	97109	93051.9	89110.2	61190.5	87161.1	93016.7	101808	71412.3	75950.7	96330.1	42014.8	-	C03761	-
pmb2673	6-Hydroxydopaquinone	0	Amino acids and derivatives	Amino acids and derivatives	C9H9NO5	210.04	135.04	211.048	[M-H]-	3	135791-48-9	-	7853.87	9405.28	6534.68	12849.9	10455.7	11599.8	26330.7	22912.5	29775.3	22685.5	28948.3	25724.1	16263.4	18328.1	23192.2	16150.4	18851.2	13591.8	-	-	-
Lcfn121143	dendrodolideK	0	Others	Others	C12H20O5	243.12	225.11	244.131	[M-H]-	1	-	-	15743.1	12031	14187.1	24677.7	32181.8	22100.2	27291.5	41875.7	39321.2	23362.9	26505.7	24346.7	32646.1	35399.1	26837.3	18386.7	29956.8	25501	-	-	-
Zbln007887	phoyunbene F	0	Others	Stilbene	C15H14O4	257.08	213.06	258.089	[M-H]-	2	-	-	24545.7	28132.7	22372.9	15869.1	14849	13613	17015.3	16956.3	19661	18571.6	23358.9	15216.4	13945.8	10984.1	7189.89	12714.3	27482.5	27648.8	-	CM02265	MetMap150,MetMap152
Waptn02904	3-(3,5-dihydroxyphenyl)propanoic acid glucoside*	0	Phenolic acids	Phenolic acids	C15H20O9	343.1	181.05	344.111	[M-H]-	1	-	-	329615	341359	337104	233771	268483	221160	253255	192751	245004	253904	314190	351761	155918	165428	169672	246415	240829	288349	-	-	-
MWSslk084	4-Butylresorcinol	0	Phenolic acids	Phenolic acids	C10H14O2	165.09	122.04	166.099	[M-H]-	3	18979-61-8	C18343	41239.3	56673.6	54629	65019.9	55718.6	49984.6	68391.3	60366.8	55607.7	69263.8	71507.2	56219.1	67873.7	58087.4	50407.4	56487.3	77867.2	53601.7	-	C18343	-
Lmfn004235	Myricetin-3,7,3'-trimethyl ether	0	Flavonoids	Flavonols	C18H16O8	359.08	161.02	360.084	[M-H]-	3	-	-	4190	4733.93	1899.27	13880.6	21285.2	12201.4	24917.5	14540.9	20460.9	18493	16581.9	13734.2	30875.5	35590.2	38764.7	19744.7	10933.6	27788.2	-	CM00800	MetMap109
Safn011802	Dihydromonacolin L acid	0	Others	Others	C19H32O4	323.22	305.21	324.23	[M-H]-	3	-	C20851	17562.7	15480	12030	7065.87	10282	8337	4569.11	2916.16	8817.95	3366.52	5137.02	7312.31	13646.4	5342.05	6204.54	12550.2	13656.4	12275	ko01100,ko01110	C20851	-
WaYn000716	Citric Acid diglucoside	0	Organic acids	Organic acids	C18H28O17	515.12	341.11	516.133	[M-H]-	1	-	-	28254.8	60708.3	79031.8	23253.8	16960.8	32728.7	39663.5	30970.4	32214.6	21179.7	41353.9	22342.3	46413.6	28035.2	14440.5	46477.9	39409.9	47912.8	-	-	-
mws1179	Naringenin 7-O-beta-D-glucoside	0	Flavonoids	Flavanones	C21H22O10	433.11	271.07	434.121	[M-H]-	3	529-55-5	C09099	16742.4	22650.1	21466.6	22656.9	35651.4	35133.5	31559.3	38638.1	35510.2	43508.5	35125.4	31606	26932.6	30992.3	36610.3	35494.2	29992.7	33289.1	ko00941,ko01100	C09099	-
Rln002185	Methyl 4-(beta-d-glucopyranosyloxy)-3-hydroxy-5-methoxybenzoate	0	Phenolic acids	Phenolic acids	C15H20O10	359.1	137.02	360.106	[M-H]-	2	-	-	253127	257727	243596	186273	192396	186666	174502	175061	171701	237841	218325	237965	239906	215615	192349	204327	222663	192919	-	-	-
Zjbn102551	7-hydroxy-2-methoxyphenanthrene-3,4-dione	0	Others	Others	C15H10O4	253.05	210.03	254.058	[M-H]-	2	-	-	720956	704733	545391	235283	247292	238913	89527.1	77903.6	99621.2	121426	144012	138545	30857.5	25649.5	18683.9	256425	237319	234637	-	-	-
Lakn003294	2-β-D-Glucopyranosyloxy-5-hydroxyphenylacetic acidmethylester*	0	Phenolic acids	Phenolic acids	C15H20O9	343.1	181.05	344.111	[M-H]-	1	-	-	339272	328097	316548	265325	253901	253020	203172	222484	241725	268315	295385	291168	160853	162810	187046	277496	251081	268591	-	CM02883	MetMap172
Wmzn000227	2,2-Dimethylsuccinic acid	0	Organic acids	Organic acids	C6H10O4	145.06	109.04	146.058	[M-H]-	3	597-43-3	-	28724.2	21173.1	25408.9	14098.9	8053.65	9534.84	9552.48	4011.84	6009	5515.67	9099.5	2009.67	3023	5035.31	4523	10578	9045	12573.6	-	-	-
Zbsn005918	Chrysoeriol-7-O-(6''-acetyl)glucoside	0	Flavonoids	Flavones	C24H24O12	503.12	299.06	504.127	[M-H]-	3	-	-	64301.7	58761.4	43741.6	1067.81	1067.81	1067.81	7741.07	8092.21	10793.5	5339.07	20201.2	18849.2	18151.9	22112.3	16729.3	36519	22167.9	34395.5	-	CM00231	MetMap106
Rfn05001	Nepetariaside	0	Others	Others	C16H28O8	347.17	347.17	348.178	[M-H]-	2	110344-61-1	-	39737.3	67000.1	41598.2	20877	18253.1	18582.8	21307.3	20424.6	16183.1	30101.7	38691.2	46873.8	19419.9	40095.1	18422.6	35338.1	32062.2	48276.7	-	-	-
Safn001555	Val-Leu-Asp	0	Amino acids and derivatives	Amino acids and derivatives	C15H27N3O6	344.18	228.17	345.19	[M-H]-	3	-	-	11753.2	31928.7	23332.5	31309.9	44934.6	41391.6	39409.5	30702.3	30342.7	18177	42421.2	40525.6	38471.1	43600.9	25609.1	29012.4	40391.3	47870	-	-	-
MWSslk171	Nodakenin	0	Lignans and Coumarins	Coumarins	C20H24O9	407.13	227.07	408.142	[M-H]-	3	495-31-8	C09279	15779.9	28645.9	9566.61	36371.4	9637.57	27865.6	33266.8	15342.4	37344.1	49267.7	24566	28516.8	28774.1	23959	22108.7	31620.1	13443.8	40195.3	-	C09279	-
Zmtn001661	Vanilloloside	0	Others	Alcohol compounds	C14H20O8	315.11	153.02	316.116	[M-H]-	3	74950-96-2	-	395588	457851	383212	627980	740595	833408	691227	719341	780751	488396	747267	759413	597529	706094	453531	736090	699257	677901	-	CM02532	MetMap160,MetMap163
mws0036	Hesperidin	0	Flavonoids	Flavanones	C28H34O15	609.18	301.09	610.19	[M-H]-	3	520-26-3	C09755	17892.7	16640.9	16852.3	74281.7	18294.7	36379.9	37705.2	44842.5	41102.5	23458.4	38345.6	26211.5	30684.3	53771	72857.6	64093.4	59888.5	27279.9	-	C09755	-
MWS20171	1-hydroxy-6-hydroxymethyl-anthraquinone	0	Quinones	Anthraquinone	C15H10O4	253.05	225.06	254.058	[M-H]-	3	-	-	20247.3	16285.2	19110.6	6646.28	8826.35	9840.3	5603.03	11815.9	5038.87	11327.2	14673	11627.5	7281.5	5556.71	5400.36	13152.3	7476.08	8800.48	-	-	-
Sasn003265	Deacetyl asperuloside	0	Terpenoids	Monoterpenoids	C16H20O10	371.1	165.06	372.106	[M-H]-	2	18843-01-1	-	91806.6	65010.8	60951	50233.2	52979.9	36695.3	3255.26	3255.26	3255.26	65282	39775.3	53733.1	16276.3	21769.3	25162.7	42885.8	49174.3	41326.8	-	-	-
Lmhn002321	Vnilloylcaffeoyltartaric acid	0	Phenolic acids	Phenolic acids	C21H18O12	461.07	167.04	462.08	[M-H]-	3	-	-	13638	18339.4	19927.9	20624.1	20717.7	25798.5	18466.2	30290.3	22881.9	24231.2	21015.9	25817.9	24361.9	15517.8	33218.9	19911.8	26904.9	23999.9	-	CM02743	MetMap167,MetMap168
Lmhn102068	2-O-Caffeoylmalic acid	0	Phenolic acids	Phenolic acids	C13H12O8	295.05	179.03	296.053	[M-H]-	2	53755-04-7	-	144408	85107	111695	59040.8	72195.1	34993.2	6400.9	6400.9	6400.9	94745.7	90114.9	76984.1	44507.6	46903.3	32004.5	69799.2	54659.6	42179.2	-	CM02637	MetMap168
Sasn000277	myo-Inositol 4-phosphate	0	Others	Saccharides	C6H13O9P	259.02	78.96	260.03	[M-H]-	1	142760-33-6	C03546	659163	663477	633407	514197	459597	490268	436392	503098	509910	435614	475390	436776	425660	469963	473991	522899	552167	492089	ko00562,ko01100,ko04070	C03546	-
Labn004065	4-Hydroxybenzoyl acetyl glucoside	0	Phenolic acids	Phenolic acids	C15H18O9	341.09	137.03	342.095	[M-H]-	2	-	-	118620	86764.5	69535.2	38117	37711.4	24039.9	35157.3	28104.8	26616.6	42545.1	44023.5	45102	23661.8	21388.9	19972.3	51742.4	35887.1	43622.9	-	CM02471	MetMap157
pmb2871	1-O-Gentisoyl-β-D-glucoside*	0	Phenolic acids	Phenolic acids	C13H16O9	315.07	153.02	316.079	[M-H]-	1	23445-11-6	-	1.11354e+06	1.10323e+06	1.10097e+06	1.59038e+06	1.9545e+06	2.21671e+06	1.91729e+06	2.05021e+06	2.15714e+06	1.95491e+06	2.1159e+06	1.89722e+06	1.60902e+06	1.96757e+06	1.45641e+06	1.99923e+06	1.99646e+06	1.68957e+06	-	CM02554	MetMap159
MWSmce507	Mulberroside A	0	Phenolic acids	Phenolic acids	C26H32O14	567.17	243.07	568.179	[M-H]-	2	102841-42-9	-	63227.7	54464.3	59814.5	9289.98	17851.5	18403.7	8791.52	26094.9	12995.8	11641.5	11905.8	26705.9	1758.3	1758.3	1758.3	31678.1	19768.2	16583.6	-	-	-
pme0256	Xanthine	0	Nucleotides and derivatives	Nucleotides and derivatives	C5H4N4O2	151.03	108.02	152.033	[M-H]-	3	69-89-6	C00385	16368.9	18550	24161.2	6177.65	11687.6	9932.89	4618.71	10690.5	13655.4	12366.4	12432.1	21558.8	923.741	923.741	923.741	18012.4	11654.6	10924.9	ko00230,ko00232,ko01100,ko01110,ko01232	C00385	-
Saln005928	Pandangolide 1a	0	Others	Others	C12H20O5	243.12	199.13	244.131	[M-H]-	1	-	-	5721.02	11003.5	7476.21	13707	5457.82	10614.8	18297.5	15020.3	14369.1	8608.99	14252.1	12273.8	12915.8	17836	7890.76	11144	6775.76	8101.32	-	-	-
Lmsn003628	6'-O-Sinapoylsucrose*	0	Phenolic acids	Phenolic acids	C23H32O15	547.17	223.06	548.174	[M-H]-	1	-	-	43498.2	29463	41758	23871.8	17136.7	24727.1	17509.5	26075.1	16796.1	18319.6	30385.8	19567.5	3043.73	3043.73	3043.73	21493.8	15218.6	26452.9	-	-	-
ZBN0258	Tricin-5-O-guaiacylglycerol-ether-4'-O-glucoside	0	Flavonoids	Flavones	C33H36O16	687.19	329.07	688.2	[M-H]-	2	-	-	9041.98	8918.24	7496.68	8534.23	19669	17731.3	19050.1	18344	15160.7	21939	18977.7	20261.9	17007.8	17594	16198.9	11840	14616.9	13455.1	-	-	-
Smln008909	Aloebarbendol	0	Phenolic acids	Phenolic acids	C15H14O4	257.08	239.07	258.089	[M-H]-	2	194145-93-2	-	22790.3	26346.9	32897.7	11001.1	15209	15956.7	6341.4	11520.8	8389.83	7539.68	13588.4	14676.8	10914.7	7955.08	10217.3	15872.9	12771.7	18190.3	-	-	-
Wahln02628	Theviridoside*	0	Terpenoids	Monoterpenoids	C17H24O11	403.12	167.03	404.132	[M-H]-	3	23407-76-3	-	23532.2	28095.6	30896.1	7628.75	7076.1	7073.13	4903.68	9484.6	3821.8	24795.5	22198.3	20150.2	764.36	764.36	764.36	19201.5	16316.7	15632.3	-	-	-
Hmfn000531	Ascorbate	0	Others	Vitamin	C6H8O6	175.02	87.01	176.032	[M-H]-	2	50-81-7	C00072	49932	48160.5	38639.4	72187.9	68908.2	74925.2	92513.3	96636.4	101760	102930	136893	119051	90831	66310.1	83945.5	95242.1	73142.9	66411	ko00053,ko00480,ko01100,ko01110,ko01240	C00072	-
Zjbn102533	2,7-Dihydroxy-3,4-Dimethoxyphenanthrene	0	Others	Others	C16H14O4	269.08	239.04	270.089	[M-H]-	3	-	-	28394.1	29618.3	21191.4	13815.6	10567.9	10384.3	1738.89	1738.89	1738.89	1738.89	1738.89	1738.89	1738.89	1738.89	1738.89	8694.45	10260.8	10725.9	-	-	-
Sasn002370	Deacetyl asperulosidic acid methyl ester*	0	Terpenoids	Monoterpenoids	C17H24O11	403.12	167.04	404.132	[M-H]-	3	52613-28-2	-	37957.6	30698.8	45458.4	6744.1	6800.74	7095.95	1348.82	1348.82	1348.82	29934.7	25522.8	36962	1348.82	1348.82	1348.82	27318.5	15100.5	14793.7	-	-	-
Wchn003237	3-hydroxy-5-methoxybenzaldehyde	0	Phenolic acids	Phenolic acids	C8H8O3	151.04	77.04	152.047	[M-H]-	3	57179-35-8	-	20675.2	10783.7	12070.7	9688.16	8632.14	5164.86	817.87	817.87	817.87	817.87	817.87	817.87	7754.54	9565.93	4089.35	11772.2	9626.14	8220.15	-	CM02824	MetMap164
MWS4471	N-Alpha-Acetyl-L-Asparagine	0	Amino acids and derivatives	Amino acids and derivatives	C6H10N2O4	173.06	58.03	174.064	[M-H]-	2	4033-40-3	-	107415	81534.5	70000.9	21773.4	27114.2	19000.3	32005.4	14978.9	28185.2	2995.78	2995.78	2995.78	2995.78	2995.78	2995.78	29979.5	35263.4	39113.4	-	-	-
Zmhn001414	Resveratrol-3,5-di-O-glucoside	0	Others	Stilbene	C26H32O13	551.18	227.07	552.184	[M-H]-	3	-	-	19731.4	22550.4	16788.5	4506.5	6834.19	7577.17	901.3	901.3	901.3	5306.09	5336.9	15206.7	901.3	901.3	901.3	9507.92	12157	12488.4	-	CM02317	MetMap152
pmn001672	Furanofructosyl-α-D-(3-mustard acyl)glucoside*	0	Phenolic acids	Phenolic acids	C23H32O15	547.17	223.1	548.174	[M-H]-	1	-	-	36256.6	39253.3	35309.2	20129.5	22964.6	21671.4	15651.2	13729	15744.6	15738.9	23318.9	17137.2	7536.61	6047.72	3223.27	15969.2	16082.5	17012.2	-	CM02709	MetMap153
mws0396	(9E)-Octadecenoic acid*	0	Lipids	Free fatty acids	C18H34O2	281.25	281.25	282.256	[M-H]-	1	112-79-8	C01712	579497	372082	455436	176554	355210	369575	147234	384476	216803	376627	264229	200130	262429	238062	386979	329133	510762	566836	-	C01712	-

## Sheet: Pureple
nodeName	Compounds	degree	ClassⅠ	ClassⅡ	Formula	Q1 (Da)	Q3 (Da)	Molecular weight (Da)	Ionization model	Level	CAS	cpd_ID	120DAI_1	120DAI_2	120DAI_3	180DAI_1	180DAI_2	180DAI_3	240DAI_1	240DAI_2	240DAI_3	300DAI_1	300DAI_2	300DAI_3	360DAI_1	360DAI_2	360DAI_3	QC01	QC02	QC03	kegg_map	mw_cpd_ID	mw_map
Saln001190	Abealpha1-3Manalpha	13	Others	Others	C12H22O9	309.12	59.01	310.126	[M-H]-	1	-	-	149997	133634	149934	2.816e+06	2.69318e+06	2.81966e+06	5.21405e+06	5.33491e+06	5.09972e+06	264701	295978	320973	26726.9	26726.9	26726.9	1.79143e+06	1.75093e+06	1.61116e+06	-	-	-
Lmdp003509	Quercetin-3-O-xyloside (Reynoutrin)	10	Flavonoids	Flavonols	C20H18O11	435.09	303.06	434.085	[M+H]+	3	549-32-6	-	14464.6	11280.4	20295.4	26915.6	23930.4	32235	125784	109018	133740	27314.2	29497.7	42968.2	10880.7	7667.94	16956	50578.1	67223.7	31425.1	-	CM00561	MetMap116
Hasp012866	Saurufuran A*	8	Terpenoids	Ditepenoids	C20H28O3	317.21	95.05	316.204	[M+H]+	2	425368-86-1	-	128510	146526	119886	233571	231245	294473	415070	513789	295619	30733.1	60274	73943.6	113440	102943	131723	174651	146852	162515	-	-	-
Sasp001756	Itoside L	8	Others	Others	C12H20O8	310.15	131.07	292.116	[M+NH4]+	2	-	-	145118	103096	112315	509683	587118	546831	1.02374e+06	1.03013e+06	904972	294956	226292	253567	116732	140675	122723	341154	440030	263766	-	-	-
Hasp013107	Saurufuran B*	8	Terpenoids	Ditepenoids	C20H28O3	317.21	95.05	316.204	[M+H]+	2	425368-87-2	-	106652	128902	110380	218158	173172	222450	340663	448347	246504	30756.9	56970.7	51621	85913.8	77622.3	94996.4	124577	130056	134142	-	-	-
pme3207	cis,cis-Muconate*	8	Organic acids	Organic acids	C6H6O4	141.02	59.01	142.027	[M-H]-	3	1119-72-8	C02480	1.09822e+06	1.21033e+06	1.88442e+06	2.86901e+06	3.00943e+06	2.98665e+06	3.97218e+06	3.70855e+06	3.79626e+06	2.14354e+06	1.96153e+06	1.86991e+06	457389	272600	300116	1.46956e+06	1.64831e+06	1.575e+06	ko01100	C02480	-
Sadn000316	2-Oxo-2,3-dihydrofuran-5-acetate*	8	Organic acids	Organic acids	C6H6O4	141.02	59.02	142.027	[M-H]-	3	-	C03586	588476	617824	829547	1.41267e+06	1.39552e+06	1.46051e+06	1.76514e+06	1.85642e+06	1.96438e+06	1.07287e+06	957329	992858	238724	124525	139779	810346	801513	808520	ko01100	C03586	-
WapTKC008922	5,8,11,13-Abietatetraen-18-Oic Acid	7	Terpenoids	Ditepenoids	C20H26O2	299.21	253.2	298.193	[M+H]+	2	344363-33-3	-	4032.32	4032.32	35124.3	53526.6	37986.8	42607.8	66200.8	100705	32735.9	4032.32	4032.32	4032.32	4032.32	4032.32	4032.32	23100.1	25556	20161.6	-	-	-
Lmfn003035	6-O-p-Coumaroyl-β-D-glucose*	7	Phenolic acids	Phenolic acids	C15H18O8	325.09	145.03	326.1	[M-H]-	1	114297-65-3	-	5.93996e+06	7.09224e+06	6.10799e+06	6.9829e+06	7.65831e+06	6.77497e+06	1.15061e+07	1.11349e+07	1.04407e+07	6.21847e+06	6.79369e+06	6.91748e+06	6.17788e+06	7.10989e+06	6.68257e+06	7.91254e+06	8.35232e+06	7.43415e+06	-	CM02647	MetMap169
Zjbn102541	1-p-Hydroxybenzyl-4-methoxy-9,10-dihydrophenanthrene-2,7-diol	7	Others	Others	C22H20O4	347.13	332.1	348.136	[M-H]-	1	-	-	8086.65	9432.13	1138.93	8387.91	5973.11	6121.79	143145	75627.9	58708.4	13976	13953.8	5694.66	20306.8	11632.4	18808.6	26781.8	33854	23161.7	-	-	-
PD0494057	6-methoxy-7-(3,7,11-trimethyldodeca-2,6,10-trienoxy)chromen-2-one	6	Lignans and Coumarins	Coumarins	C25H32O4	397.24	133.03	396.23	[M+H]+	2	-	-	43217.9	44338.2	52329.1	120550	109377	115092	146627	164030	116893	23349.3	34745.5	29696.4	28733.4	33365.3	35229.9	60700.5	45060.6	53414.5	-	-	-
Rfn048602	Melilotoside	6	Phenolic acids	Phenolic acids	C15H18O8	325.09	119.05	326.1	[M-H]-	2	618-67-7	-	406974	486805	457522	528758	466710	545148	776363	850902	907103	406496	488157	404520	431417	442699	529181	552351	533922	500343	-	-	-
Zmhn001358	4-(beta-D-glucosyloxy)benzoic acid*	6	Phenolic acids	Phenolic acids	C13H16O8	299.08	137.02	300.084	[M-H]-	2	15397-25-8	C03993	280523	229654	208036	258813	225525	262116	502078	431727	398178	260620	224440	219633	257107	243478	250910	321915	301499	280526	ko00130	C03993	MetMap157
Hmln005580	Cymbinodin A	6	Quinones	PhenAnthraquinones	C15H10O4	253.05	237.02	254.058	[M-H]-	1	130837-95-5	-	322607	327669	351894	341264	336803	395005	416587	480961	491348	234050	291451	223278	70899.2	84059.4	57668.9	398873	366494	375140	-	-	-
Zjbn102535	1,7-dihydroxy-2,5-dimethoxy-9,10-dihydrophenanthrene	6	Others	Others	C16H16O4	271.1	256.07	272.105	[M-H]-	1	-	-	6687.48	3386.66	3553.25	11048.4	15669	11446.1	31622.5	25350.6	18736.3	677.332	677.332	677.332	677.332	677.332	677.332	14995.3	14981.4	13373	-	CM02193	MetMap162
PDP133151	UNPD107633	5	Lipids	Free fatty acids	C22H34O3	347.26	145.1	346.251	[M+H]+	2	-	-	5513.03	14191.2	15751.3	23407.3	31628.5	22235.7	37738.8	49705.8	28760.2	1102.61	1102.61	1102.61	1102.61	1102.61	1102.61	15067.7	9998.61	15625.3	-	-	-
Lmsn003111	p-Coumaroyl-D-glucose*	5	Phenolic acids	Phenolic acids	C15H18O8	325.09	145.03	326.1	[M-H]-	1	7139-64-2	C16827	7.24097e+06	7.67437e+06	7.86624e+06	8.54641e+06	8.59943e+06	8.17331e+06	1.29302e+07	1.36612e+07	1.28876e+07	7.33343e+06	8.07334e+06	8.292e+06	8.08356e+06	8.64611e+06	9.26622e+06	9.96872e+06	9.47107e+06	1.07084e+07	-	C16827	-
Safn004006	Phenylacetylaspartic acid*	5	Amino acids and derivatives	Amino acids and derivatives	C12H13NO5	250.07	88.04	251.079	[M-H]-	1	-	-	5.86669e+06	4.78601e+06	5.19037e+06	5.38152e+06	5.44974e+06	5.81344e+06	7.47028e+06	7.5382e+06	7.25617e+06	3.76201e+06	3.71336e+06	3.85162e+06	2.39501e+06	2.49226e+06	2.30956e+06	5.38937e+06	5.49241e+06	5.08176e+06	-	-	-
Wasdn02417	3-hydroxybenzoyl-β-D-glucose*	5	Phenolic acids	Phenolic acids	C13H16O8	299.08	137.02	300.084	[M-H]-	2	-	-	270929	204743	188765	297603	246581	234056	488638	415349	418951	271675	230258	268087	220135	242819	244267	257240	270994	259119	-	-	-
MWSslk177	Lithospermoside	4	Alkaloids	Alkaloids	C14H19NO8	330.12	168.07	329.111	[M+H]+	3	63492-69-3	C17771	179276	138873	177304	454993	458152	470154	773760	592925	690768	405753	350525	343030	27774.6	27774.6	27774.6	335431	347717	402330	-	C17771	-
pmb2804	(9Z,11E)-(13S)-13-Hydroperoxyoctadeca-9,11-dienoic acid	4	Lipids	Free fatty acids	C18H32O4	311.22	171.14	312.23	[M-H]-	3	33964-75-9	C04717	81713.4	78122.9	67494.5	100815	97695.7	110733	189893	193639	206328	38281.7	37796.8	39447.6	74711.8	72280.9	69035.7	91650	109312	94735.9	ko00591,ko01100	C04717	-
Ymjm000148	Salidroside	4	Phenolic acids	Phenolic acids	C14H20O7	299.11	137.02	300.121	[M-H]-	1	10338-51-9	C06046	232719	259155	212491	239114	228890	227783	512724	454238	441048	248483	279307	243429	271558	273648	241497	299040	281908	314068	ko00350,ko01100	C06046	-
Zbqn003921	N-carboxy-N-(2-oxo-2-phenylethyl)-L-alanine*	4	Amino acids and derivatives	Amino acids and derivatives	C12H13NO5	250.07	88.04	251.079	[M-H]-	1	-	-	5.76231e+06	5.70792e+06	5.0833e+06	5.08103e+06	5.80809e+06	5.67141e+06	7.70478e+06	7.49256e+06	7.61479e+06	3.66453e+06	3.66619e+06	4.17015e+06	2.57567e+06	2.40453e+06	2.14824e+06	5.01632e+06	4.98579e+06	4.95467e+06	-	-	-
Zbln010189	Orchinol	4	Quinones	PhenAnthraquinones	C16H16O3	255.1	225.06	256.11	[M-H]-	2	41060-20-2	C10272	445.285	445.285	445.285	17922.8	18955.2	18688.6	33664.6	38511.1	37478.5	17891.8	21994.4	17097.4	3308.17	3289.01	2226.42	16141.9	19921.7	17694.7	-	C10272	MetMap162
Sadp013780	N,N-Diethyl-m-toluamide	3	Alkaloids	Alkaloids	C12H17NO	192.14	119.05	191.131	[M+H]+	1	134-62-3	C10935	539753	566225	531238	495049	421843	489594	375744	372605	350429	443612	547192	506065	634607	569191	530998	395292	468187	442076	-	C10935	-
pme2292	Putrescine	3	Alkaloids	Alkaloids	C4H12N2	89.11	72.08	88.1	[M+H]+	3	110-60-1	C00134	521237	380860	414275	569303	477690	628008	616532	705364	744236	423415	278703	363059	55740.6	55740.6	55740.6	281497	447448	330969	ko00330,ko00470,ko00480,ko00960,ko01100,ko01110,ko02010,ko04148	C00134	-
MWS20170	3-hydroxy-1,2-dimethoxy-anthraquinone	3	Quinones	Anthraquinone	C16H12O5	283.06	253.02	284.068	[M-H]-	3	10383-62-7	-	7038.02	9814.2	11467.9	19080.4	19030.9	24575.9	22981.9	32175.3	32187.9	15771.2	18753.3	15069.9	6048.22	6603.51	7125.77	17788.3	18907.3	12633.8	-	-	-
Wcsp009602	(5E,9E)-6,10,14-trimethylpentadeca-5,9,13-triene-2,12-dione	2	Others	Others	C18H28O2	277.22	107.08	276.209	[M+H]+	2	-	-	219430	210051	192885	165533	167916	176168	290770	307555	272730	141742	128511	166271	119197	111056	105975	202066	200253	206399	-	-	-
Zblp007466	oxoflavidin	2	Quinones	PhenAnthraquinones	C15H10O4	255.07	171.05	254.058	[M+H]+	1	90851-07-3	-	243934	254711	325931	267835	314030	370403	352917	463320	484409	224364	271462	201783	67264.8	68519.2	59870.3	366744	345655	358852	-	-	-
PDP170020	methyl 2,2-dimethyl-3,4-dihydro-1-benzopyran-6-carboxylate	2	Phenolic acids	Phenolic acids	C13H16O3	243.1	165.07	220.11	[M+Na]+	3	-	-	409025	530567	476414	776719	791874	934588	1.56272e+06	1.74173e+06	1.61179e+06	973541	1.39284e+06	1.25433e+06	970383	991120	958987	1.34388e+06	1.15334e+06	1.15063e+06	-	-	-
pmb1754	Choline phosphate	2	Alkaloids	Alkaloids	C5H15NO4P+	184.07	125	184.073	[M]+	3	107-73-3	C00588	4.07117e+06	4.72355e+06	4.51948e+06	4.50724e+06	4.50967e+06	4.34688e+06	5.92628e+06	5.56655e+06	5.19057e+06	3.699e+06	4.19795e+06	4.02782e+06	3.54758e+06	3.47784e+06	3.46497e+06	3.87156e+06	4.14883e+06	4.61987e+06	ko00564,ko01100	C00588	-
PD0915979	Norophthalamic acid	2	Amino acids and derivatives	Amino acids and derivatives	C10H17N3O6	276.12	84.04	275.112	[M+H]+	3	16305-88-7	-	258970	399569	376680	516944	486775	447847	589204	693358	652593	405449	329793	322321	232354	186633	231353	373814	420455	392175	-	-	-
PD0437141	Lys-Glu	2	Amino acids and derivatives	Amino acids and derivatives	C11H21N3O5	276.16	84.08	275.148	[M+H]+	3	-	-	243335	395415	374253	493461	450646	381951	622082	708735	633593	409569	374065	404780	190784	232721	214366	295775	341261	329845	-	-	-
MWSCX012	Callicarpone	2	Terpenoids	Ditepenoids	C20H28O4	333.2	199.14	332.199	[M+H]+	2	5938-11-4	C09067	140849	138318	126638	310305	317915	328356	350559	369998	414178	115243	131500	142171	168832	194522	147570	220147	228769	187618	-	C09067	-
PDP037399	Pantoyllactone glucoside	2	Others	Others	C12H20O8	293.13	113.06	292.116	[M+H]+	2	-	-	5128.69	5128.69	5128.69	221950	81182.6	83999.2	320708	241629	309185	49721.6	93241.5	27080.9	25643.5	74563.2	59827.7	102756	97956.5	191505	-	-	-
Rfn03936	(E)-N-[4-(diaminomethylideneamino)butyl]-3-(3,4-dimethoxyphenyl)prop-2-enamide	2	Alkaloids	Phenolamine	C16H24N4O3	321.19	191.07	320.185	[M+H]+	2	-	-	49160.2	49620.6	53312.3	33243.7	25536.6	32064.6	10090.7	16657.1	8351.05	53604.4	26639	49350.6	52418.7	81060.5	50871	54113.1	42638.9	41514	-	-	-
Zmhn001926	1-O-Salicyloyl-β-D-glucose*	2	Phenolic acids	Phenolic acids	C13H16O8	299.08	137.02	300.084	[M-H]-	2	60517-74-0	-	186751	178648	213308	261475	223668	210102	474252	401371	379834	260952	213211	239098	251751	199846	256782	244830	250980	251618	-	CM02529	MetMap158
Lcfn121125	DL-glutamyl-DL-glutamine	2	Amino acids and derivatives	Amino acids and derivatives	C10H17N3O6	274.11	145.06	275.112	[M-H]-	2	-	-	50598.3	46577.7	45264.9	80694.8	87721	79562.1	88916.4	120456	119354	45148	63651.7	71051.1	17856.4	38319.2	34196.1	61511.6	68942.1	63324.1	-	-	-
Lcfp031510	2-amino-5-methylhexanoicacid	1	Alkaloids	Alkaloids	C7H15NO2	146.12	55.05	145.11	[M+H]+	3	3558-32-5	-	127572	99369.2	98063.1	183215	178729	171953	255765	337804	356906	151982	189371	213646	140298	121911	131972	190887	209849	205654	-	-	-
Lajp011000	6-(2',3'-dihydroxy-3-methylbutyl)-8-prenyl umbelliferone	1	Lignans and Coumarins	Coumarins	C19H24O5	333.17	189.06	332.162	[M+H]+	2	-	-	91355.8	73408.9	57700.2	163426	174806	172335	159558	183887	217772	56325.1	70283.9	61210.2	89725	89282.9	97890.8	97861.9	126283	91116.1	-	-	-
Zmmp002333	L-Homonorleucine	1	Amino acids and derivatives	Amino acids and derivatives	C7H15NO2	146.12	83.09	145.11	[M+H]+	3	44902-02-5	-	74618.3	61433.3	85864.6	82252.4	89654	60749.9	141342	158801	156468	67067.4	78780.1	66823.9	44934.5	55991.4	75041.6	81261.1	93367.2	79459.1	-	-	-
mws0675	Nicotinamide D-ribonucleotide	1	Nucleotides and derivatives	Nucleotides and derivatives	C11H15N2O8P	335.06	123.06	334.057	[M+H]+	3	1094-61-7	C00455	87251.2	107682	85915.3	81798.4	109843	114929	118552	142617	150359	85805	109872	87727.9	61630.1	38582.6	43487.1	91520.8	101080	113194	ko00760,ko01100	C00455	-
Lmdp004307	Farrerol-7-O-glucoside	1	Flavonoids	Flavanones	C23H26O10	463.16	301.11	462.153	[M+H]+	3	885044-12-2	-	75586.7	69819	55972.5	54280.8	66749.2	61523.6	91393.6	134570	85547.9	42945.4	43909.9	60138.9	52142.3	43093.2	31369.4	49220.1	58384	75272.2	-	-	-
Lmhp007045	Knoxiadin	1	Quinones	Anthraquinone	C16H12O6	301.07	258.05	300.063	[M+H]+	1	98873-77-9	-	7623.53	15154.1	9009.46	32883	18813.8	22503.9	53331.5	45074.5	66727.5	24402.8	32711.4	23734.8	7037.78	15106.6	8067.21	19557.3	27041.2	29633.2	-	-	-
MWSslk205	Kirenol	1	Terpenoids	Ditepenoids	C20H34O4	339.25	133.1	338.246	[M+H]+	3	52659-56-0	-	9411.27	13858	17191.9	12697.6	12961.3	9259.96	1851.99	1851.99	1851.99	14559.6	18159.4	24862.4	16298	22910.5	23633.8	16001.8	18227.3	15457.9	-	-	-
pmp000604	Rubrofusarin-6-O-glucoside	1	Others	Ketone compounds	C21H22O10	435.13	273.07	434.121	[M+H]+	3	132922-80-6	-	3965.19	3965.19	3965.19	19825.9	28061.1	27765.6	80985.7	98648.2	53312.9	35704.8	57467	21225.2	3965.19	3965.19	3965.19	58167.3	44777.5	36590.1	-	-	-
Yhjp010205	Virgatic acid	1	Terpenoids	Triterpene	C30H46O4	471.35	471.35	470.34	[M+H]+	3	14356-51-5	-	28555.7	28555.7	28555.7	28555.7	28555.7	28555.7	221930	185000	317201	28555.7	28555.7	28555.7	28555.7	28555.7	28555.7	177091	157225	142778	-	-	-
Zbln009367	Hircinol	1	Quinones	PhenAnthraquinones	C15H14O3	241.09	198.07	242.094	[M-H]-	1	41060-05-3	C10261	444244	533649	436413	738581	828342	924878	1.47848e+06	1.5326e+06	1.41041e+06	777699	1.21422e+06	941813	805913	832072	766306	1.10478e+06	1.0167e+06	1.04765e+06	-	C10261	MetMap162
pmf0297	1-Eicosanol	1	Lipids	Free fatty acids	C20H42O	297.32	183.21	298.324	[M-H]-	3	629-96-9	-	35267.8	34333.8	36388.5	36311.4	36226.3	41574	41813.8	45989.5	42450.1	33990.6	34123.1	34026.4	33312.2	30305	34384.5	39338.8	38185.9	34866.8	-	-	-
Ymjm000154	Salicin	1	Phenolic acids	Phenolic acids	C13H18O7	285.1	123.05	286.105	[M-H]-	2	138-52-3	C01451	54015.9	57065.7	50291.4	87771.9	81481.3	95244.4	115035	138849	115313	84053.5	105906	87289.5	69920.4	55946.2	61413.7	91906.2	85155.5	80354.7	ko00010	C01451	-
Zjbn102537	Coelonin	1	Quinones	PhenAnthraquinones	C15H14O3	241.09	226.06	242.094	[M-H]-	1	-	-	3.50927e+06	4.49798e+06	3.62697e+06	6.00684e+06	6.81811e+06	7.7651e+06	1.21823e+07	1.24323e+07	1.19324e+07	6.60842e+06	1.07115e+07	8.45705e+06	7.05227e+06	7.09168e+06	6.7466e+06	8.74358e+06	8.64076e+06	8.7367e+06	-	-	-
MWSHC20189	Epipinoresinol*	1	Lignans and Coumarins	Lignans	C20H22O6	357.13	151.04	358.142	[M-H]-	3	18779-41-4	-	7334.93	5959.2	7151.14	5022.55	8910.2	6866.11	1004.51	1004.51	1004.51	7483.12	9425.98	9187.91	13919.8	14025.7	12823.4	12940	11598.4	9937.85	-	-	-
MWSmce326	AICAR phosphate (Acadesine phosphate)	1	Nucleotides and derivatives	Nucleotides and derivatives	C9H17N4O9P	355.06	96.97	356.073	[M-H]-	3	681006-28-0	-	2783.31	2783.31	14396.6	13916.6	17982	17138.6	22960	27544.7	39573.9	2783.31	2783.31	2783.31	2783.31	2783.31	2783.31	28907.6	29236.9	21200.2	-	-	-
Zkep107564	Ile-gly	0	Amino acids and derivatives	Amino acids and derivatives	C8H16N2O3	189.12	86.1	188.116	[M+H]+	3	-	-	495051	481104	422901	398925	384912	389349	301409	324044	325349	342470	359486	400901	457941	445267	395236	381218	362597	447731	-	-	-
WapTKC132826	8,12-Epoxy-1(6),3,7,9-Cadinatetraene-2,3-dione	0	Terpenoids	Sesquiterpenoids	C15H14O3	243.1	165.07	242.094	[M+H]+	1	-	-	353458	533146	484796	709196	838041	917516	1.4656e+06	1.63364e+06	1.47139e+06	872183	1.44164e+06	1.1117e+06	935616	953016	918413	1.19803e+06	1.13382e+06	1.17396e+06	-	-	-
Lmjp004816	Loliolide*	0	Terpenoids	Monoterpenoids	C11H16O3	197.12	133.1	196.11	[M+H]+	1	5989-02-6	-	360123	311471	148309	372199	356903	321782	406909	376640	442830	343115	301702	290728	230503	283630	268875	198204	330998	310672	-	-	-
HX1340	epiloliolide	0	Others	Others	C11H16O3	197.12	133.1	196.11	[M+H]+	1	-	-	471486	483818	332994	672945	558443	555219	646350	681208	824900	600737	471752	557372	402167	546639	477529	494354	599452	581570	-	-	-
PDP064902	Xylarinorditerpene R	0	Terpenoids	Ditepenoids	C18H28O2	277.22	93.07	276.209	[M+H]+	2	-	-	89564.9	87802.3	100655	81335	86154	82724.7	105286	99145.8	111272	83602	75235	68003.7	78775.8	97474	73154.7	118920	98421.5	85834.8	-	-	-
Qmjp081202	Henryin A	0	Terpenoids	Sesquiterpenoids	C17H20O2	257.15	131.09	256.146	[M+H]+	3	-	-	91516.7	77474.5	57799.1	87251.6	91984.7	103485	79612.6	87576.4	141531	100651	81324.9	89431.3	70666.2	104328	76566.3	117276	117426	106457	-	-	-
WapTKC009987	3-Isopropyl-6-Methyl-4,6-Heptadienoic Acid*	0	Terpenoids	Monoterpenoids	C11H18O2	183.15	95.09	182.131	[M+H]+	3	54557-55-0	-	75339	58262.9	69573.8	63288.3	62534	77583	41892.8	48247.9	30310.1	63024.8	65639.4	44089.6	63588.6	72596.6	66354.8	47397.5	55027.8	50790.6	-	-	-
WapTKC065928	11-Hydroxybuxatenone	0	Steroids	Steroid	C22H30O3	343.23	145.1	342.219	[M+H]+	1	-	-	232061	160699	167088	168749	171231	163028	265078	237590	267512	154427	189034	182029	171751	204224	157571	236053	275561	238607	-	-	-
WapTKC212001	17beta-estradiol	0	Steroids	Steroid	C18H24O2	273.18	119.08	272.178	[M+H]+	2	-	-	54226.8	59667	42388.1	52321.4	51314.2	46860.7	67223.3	78937.4	75272.7	50702	57535.9	45908.9	30707.9	53020	34476.4	67527.7	59362.3	43312	-	-	-
pmb0885	4-Oxo-9Z,11Z,13E,15E-Octadecatetraenoic Acid	0	Lipids	Free fatty acids	C18H26O3	291.2	191.11	290.188	[M+H]+	3	-	-	183649	177801	126166	164553	166646	178029	207561	203694	304919	198723	169565	157929	158197	167656	133318	247606	200177	235304	-	-	-
MWS0442	Maltotriose	0	Others	Saccharides	C18H32O16	527.16	365.1	504.169	[M+Na]+	3	1109-28-0	C01835	656034	302112	801143	286008	330907	287794	1.03687e+06	654488	948885	206999	393962	286840	177762	84396.7	210679	350058	396090	346290	ko02010	C01835	-
Zbqp001654	N-formyl-glucose-methyl-nornicotine	0	Alkaloids	Pyridine alkaloids	C17H24N2O6	353.17	161.11	352.163	[M+H]+	3	-	-	203499	122875	125365	164118	190395	172278	266375	232440	220778	167101	140959	150671	109324	171608	162205	143750	138691	196483	-	-	-
Rlp05183	(1S,2S,7S,10R,11S,14S,15S)-5-(4-methoxyphenyl)-2,15-dimethyltetracyclo[8.7.0.02,7.011,15]heptadec-4-en-14-ol	0	Steroids	Steroid	C26H36O2	381.28	363.27	380.272	[M+H]+	3	-	-	482518	364348	290759	440733	423933	405800	357482	389250	826047	214045	120440	114654	74224.8	177823	58017.5	539264	685402	538578	-	-	-
Zbkp000425	Heterodendrin	0	Alkaloids	Alkaloids	C11H19NO6	262.13	216.12	261.121	[M+H]+	3	66465-22-3	C08332	68898.4	42196.5	54077.2	52351.5	39630.1	45419.6	40299	42880.7	36882.5	44566.2	52646.5	64204.9	42016.8	56086.4	63852.8	56065.6	60933.2	77491.1	-	C08332	-
Sadp001120	5'-Dehydroadenosine	0	Nucleotides and derivatives	Nucleotides and derivatives	C10H11N5O4	266.09	104.07	265.081	[M+H]+	3	3110-98-3	C11500	219149	179330	205562	533909	428723	590816	625918	643101	587432	326793	364107	351779	278770	236941	299305	374562	400172	321499	-	C11500	-
Walp007095	2-Amino-7-methyltridecan-1-ol*	0	Lipids	Sphingolipids	C14H31NO	230.25	62.06	229.241	[M+H]+	1	-	-	59761.1	55949.8	57739	43185.7	40719.7	42857.9	37775.8	38787.6	43237.9	45801.1	55681.4	58574.9	56718.9	58665.4	42229	82692	63931.6	65807.9	-	-	-
Wcop008363	Tricalysione A	0	Terpenoids	Ditepenoids	C18H26O3	291.19	207.14	290.188	[M+H]+	3	941711-43-9	-	351500	359978	282406	360990	322033	334137	448606	464962	444327	327415	343377	325699	234093	346549	267743	411144	405677	425782	-	-	-
Qmjp080407	14(15)-Bisnor-13-oxolabd-8(17),11(E)-dien-19-oic acid	0	Terpenoids	Sesquiterpenoids	C18H26O3	291.19	233.16	290.188	[M+H]+	1	-	-	111735	117351	105707	104654	93746.7	106457	137922	123220	167877	112698	107508	102138	78442.3	99374.6	60296.5	147858	127857	132310	-	-	-
NK10253223	3-Methoxyanthranilate	0	Phenolic acids	Phenolic acids	C8H9NO3	168.06	94.06	167.058	[M+H]+	3	3177-80-8	C05831	67823.8	79254.7	64320	48071.3	42386.8	71099.5	34597.9	23572.7	73395.4	74469	37646.4	78715.9	61346.9	54134	69013.7	63842.8	44530.5	66848.6	ko00380	C05831	MetMap157
pmb0751	4-Coumaroylshikimate	0	Phenolic acids	Phenolic acids	C16H16O7	321.1	147.04	320.09	[M+H]+	3	-	C02947	167732	184733	164493	107623	79739.9	149845	91053.2	76821.3	74220.5	143044	211982	220907	321615	227896	210397	222073	161058	183293	ko00940,ko00941,ko00945,ko01100,ko01110	C02947	MetMap170
Lkmp122408	Malonyl byzantionoside A*	0	Terpenoids	Sesquiterpenoids	C22H32O10	457.21	133.1	456.2	[M+H]+	1	-	-	7.53667e+06	7.75896e+06	8.89827e+06	7.01218e+06	6.81728e+06	6.53826e+06	4.69258e+06	5.03956e+06	4.8021e+06	6.38322e+06	6.5127e+06	8.33319e+06	1.15148e+07	9.30213e+06	9.75975e+06	7.26534e+06	7.64876e+06	7.56168e+06	-	-	-
Wasdp05565	2,8-bis(hydroxymethyl)-4b,8-dimethyl-5,6,7,8a,9,10-hexahydrophenanthren-3-ol*	0	Terpenoids	Ditepenoids	C18H26O3	291.2	151.08	290.188	[M+H]+	1	-	-	635080	572715	475623	507553	535677	578112	664111	636996	782808	569942	587705	609918	427179	537055	426884	652343	645506	561918	-	-	-
MWS201461	Leu-Arg	0	Amino acids and derivatives	Amino acids and derivatives	C12H25N5O3	288.2	175.12	287.196	[M+H]+	3	26607-15-8	-	244952	225124	258901	190365	184946	202950	140368	112706	145713	184232	184009	170933	170926	264141	144412	235162	221897	167524	-	-	-
Lsjp211222	Buddledin C*	0	Terpenoids	Sesquiterpenoids	C15H22O	219.17	203.14	218.167	[M+H]+	2	-	-	550078	556210	551106	635588	600474	562227	647951	594861	666268	597965	572837	568162	613489	601884	545074	548498	616010	599564	-	-	-
Lhmp101303	Ranunculinin glucoside*	0	Others	Others	C11H16O8	277.09	115.04	276.084	[M+H]+	3	-	-	145518	202892	144058	156313	167135	191709	204751	272113	236917	136476	160832	139710	118673	159496	131650	122822	211474	221657	-	-	-
PDP150481	3-benzofurancarboxyaldehyde	0	Others	Lactones	C9H6O2	147.04	91.05	146.037	[M+H]+	3	-	-	2.72552e+06	2.58483e+06	2.254e+06	2.08949e+06	1.87736e+06	2.15934e+06	3.05311e+06	3.04002e+06	2.95693e+06	1.41456e+06	1.46376e+06	1.35131e+06	1.19225e+06	1.11976e+06	1.22177e+06	1.73759e+06	2.09951e+06	1.85726e+06	-	-	-
pma1840	4-Coumaroylcholine	0	Alkaloids	Phenolamine	C14H20NO3+	250.14	147.04	250.144	[M]+	1	-	-	1.08782e+07	1.1487e+07	1.02759e+07	1.23077e+07	9.43817e+06	8.75674e+06	1.29102e+07	1.41202e+07	1.31537e+07	6.47766e+06	4.97558e+06	6.85489e+06	9.32152e+06	3.95045e+06	6.40287e+06	1.12695e+07	9.95446e+06	1.04326e+07	-	-	-
mws5037	L-Alanyl-L-leucine	0	Amino acids and derivatives	Amino acids and derivatives	C9H18N2O3	203.14	86.1	202.132	[M+H]+	3	3303-34-2	-	154178	205004	208754	119598	122922	125442	86607.2	89990.5	81917.7	119341	112374	150452	144520	146972	142170	146478	127449	108534	-	-	-
PD0452605	5-methyl-3'-deoxyuridine*	0	Nucleotides and derivatives	Nucleotides and derivatives	C10H14N2O5	243.1	127.05	242.09	[M+H]+	2	7084-29-9	-	205774	131165	175621	101529	148563	90875.2	202845	185853	259919	74994.4	78830.3	92607.2	98024.8	101360	58446.1	124929	146851	196410	-	-	-
PD0795429	gamma-Glutamylglutamine	0	Amino acids and derivatives	Amino acids and derivatives	C10H17N3O6	276.12	130.05	275.112	[M+H]+	3	-	-	177718	164957	147583	195573	214326	213110	226087	275180	338555	177262	138211	180889	87218.2	101162	105461	151916	167388	188941	-	-	-
PDP138844	(5S,8R,9S,10R,12S)-Atisa-16-ene-7alpha,18-diol	0	Terpenoids	Ditepenoids	C20H32O2	305.25	60.04	304.24	[M+H]+	3	-	-	64733.1	55504.7	48280.6	61208.6	65573.1	69613.4	34952	53875.3	52533.3	63119.5	83702	69418.1	70693.5	65670.7	66035.4	79136.4	63499.6	65222.4	-	-	-
ML10195036	3-Dehydrosphinganine	0	Lipids	Sphingolipids	C18H37NO2	300.3	60.05	299.282	[M+H]+	1	16105-69-4	C02934	697663	760671	552658	822578	780504	820425	568003	617413	669863	813216	897193	775848	740272	809664	813769	731218	748144	777543	ko00600,ko01100	C02934	-
mws0251	Thymine	0	Nucleotides and derivatives	Nucleotides and derivatives	C5H6N2O2	127.05	110.02	126.043	[M+H]+	3	65-71-4	C00178	313704	321474	215705	143731	191144	184742	342841	368559	382905	114314	135164	149301	109407	107442	88905.8	198674	202902	200396	ko00240,ko01100,ko01232	C00178	-
Latp007251	Normelanothyrsin A*	0	Terpenoids	Sesquiterpenoids	C18H26O3	291.19	151.07	290.188	[M+H]+	1	-	-	589851	541992	499672	555631	522672	570981	722371	726073	778633	581093	587121	582439	353683	477074	377565	666488	611361	661514	-	-	-
MWStz331	Cyclo(Pro-Pro)	0	Amino acids and derivatives	Amino acids and derivatives	C10H14N2O2	195.11	70.06	194.106	[M+H]+	3	6708-06-1	-	31839.3	25947.4	39727.3	57477.9	43145.6	30964.2	57775.2	88860.6	67205.9	49439.9	41200.9	67848.5	49159.1	30317.7	30706	31367.1	53315.7	35516.4	-	-	-
mws0671	L-Homoserine*	0	Amino acids and derivatives	Amino acids and derivatives	C4H9NO3	120.07	74.06	119.058	[M+H]+	3	672-15-1	C00263	1.29177e+06	1.28434e+06	1.34183e+06	1.29617e+06	1.21919e+06	1.03896e+06	1.6473e+06	1.50979e+06	1.59189e+06	1.29961e+06	1.16606e+06	1.25353e+06	758729	909759	843276	956238	1.06653e+06	968601	ko00260,ko00270,ko00300,ko00920,ko01100,ko01110,ko01230	C00263	-
MW0155830	Pro-Gln-Gln	0	Amino acids and derivatives	Amino acids and derivatives	C15H25N5O6	372.19	85.03	371.18	[M+H]+	3	-	-	581850	530852	559353	624828	555872	802840	690957	781739	731682	535115	457736	568666	646270	503102	594370	627085	673778	463582	-	-	-
pme0264	Thymidine*	0	Nucleotides and derivatives	Nucleotides and derivatives	C10H14N2O5	243.1	127.05	242.09	[M+H]+	2	50-89-5	C00214	264695	303862	249218	163706	295567	267909	536806	585284	499794	152367	165024	149651	191026	176660	166423	318101	302736	283784	ko00240,ko01100,ko01232	C00214	-
Rfn01531	3-methyl-4-{[(2S,3R,4S,5S,6R)-3,4,5-trihydroxy-6-(hydroxymethyl)oxan-2-yl]oxy}-2,5-dihydrofuran-2-one*	0	Others	Lactones	C11H16O8	277.09	115.04	276.084	[M+H]+	3	-	-	144331	135703	126243	115135	169330	159843	214070	215291	220625	191668	191159	169762	163040	140471	179128	232105	254332	198164	-	-	-
pme3732	Cytidine	0	Nucleotides and derivatives	Nucleotides and derivatives	C9H13N3O5	244.09	112.05	243.085	[M+H]+	3	65-46-3	C00475	177138	181317	108834	138241	114834	183480	272343	280826	267224	106484	178356	209769	135638	82685.8	71138	135612	162141	113405	ko00240,ko01100,ko01232,ko02010	C00475	-
mws0230	L-Threonine*	0	Amino acids and derivatives	Amino acids and derivatives	C4H9NO3	120.07	74.06	119.058	[M+H]+	3	72-19-5	C00188	1.38143e+06	1.423e+06	1.61972e+06	1.43852e+06	1.54728e+06	1.35992e+06	2.06152e+06	1.92586e+06	1.86139e+06	1.37944e+06	1.43425e+06	1.35086e+06	1.03532e+06	1.13668e+06	1.08102e+06	1.20546e+06	1.3404e+06	1.27354e+06	ko00260,ko00261,ko00290,ko00470,ko00860,ko00970,ko01100,ko01110,ko01230,ko02010	C00188	-
PDP058521	[(2r,3s,4s,5r,6r)-3,4,5,6-tetrahydroxyoxan-2-yl]methyl 4-hydroxybenzoate	0	Phenolic acids	Phenolic acids	C13H16O8	301.09	139.04	300.084	[M+H]+	3	-	-	238051	252561	205728	288134	98571.9	118911	322892	348308	372478	149561	181491	142714	126978	80155.8	101953	195038	134667	192696	-	-	-
PD0568634	4-methyl-3-[3,4,5-trihydroxy-6-(hydroxymethyl)oxan-2-yl]oxy-2H-furan-5-one*	0	Others	Others	C11H16O8	277.09	115.04	276.084	[M+H]+	3	-	-	98898.1	78982.9	141626	133541	168869	150591	257384	161013	208532	147060	85618.3	148424	96956.4	186323	149666	160317	124487	143847	-	-	-
Lhkp101317	21,23-Epoxy-21,24,25-trihydroxylanost-7-en-3-one (Melianodiol)	0	Terpenoids	Triterpene	C30H48O5	489.36	379.3	488.35	[M+H]+	2	32764-64-0	-	77306.4	63306.3	56468.5	96391.2	61178.5	50395.2	78485.1	85608.9	68631.2	58574.7	48923.4	40694.9	42180.9	66608.6	60207.9	51586.7	46426.5	48730.9	-	-	-
Rfn07941	Myristoyl tryptamine	0	Alkaloids	Alkaloids	C25H36N2O	381.29	381.29	380.283	[M+H]+	3	-	-	698115	557299	401323	546576	467262	491072	424631	488811	1.05956e+06	290201	160691	104604	120434	217021	85549.6	732990	848651	599049	-	-	-
Qmyp101334	JiangxiBaiyingsu I	0	Terpenoids	Sesquiterpenoids	C18H28O3	293.21	151.11	292.204	[M+H]+	3	-	-	39502.4	26578.6	34836.4	68047.9	77582.7	71087.3	130899	129334	118258	27917	70802.2	63529.4	76637.4	51624.5	64766.3	70434.9	53659	64069.7	-	-	-
WapTKC055623	Krukovine E	0	Terpenoids	Triterpene	C29H44O3	441.34	423.35	440.329	[M+H]+	2	184092-62-4	-	105155	99525	41347.3	124330	115585	112830	130171	128800	203713	84588.5	109570	51889.8	51951	166902	59374.9	179340	236449	144909	-	-	-
mws1202	Guaiacol	0	Phenolic acids	Phenolic acids	C7H8O2	125.06	93.03	124.052	[M+H]+	3	90-05-1	C15572	18592.6	34780.5	33530.9	17361.9	33085	24807.6	46118.3	44800	21544.6	27235.3	22495.7	13007.4	13230	21519.1	22011	17278.8	47805.2	28500.9	-	C15572	MetMap163
Cmsp007222	Erianthridin	0	Quinones	PhenAnthraquinones	C16H16O4	273.11	241.09	272.105	[M+H]+	3	101508-48-9	-	36827.4	61171.4	21440.8	38840.8	27350.2	51712.5	86976.6	68127.4	54571.3	43135.3	52289.3	52942.6	31325.8	22917.3	37320.5	65223.2	68003.6	54692.5	-	CM02195	MetMap162
Hmcp001919	Isorhamnetin-3-O-(6''-acetylglucosyl)(1→3)-glucoside	0	Flavonoids	Flavonols	C30H34O18	683.18	521.12	682.174	[M+H]+	3	-	-	4017.93	4017.93	4017.93	53841.3	55131	34449.5	84259.2	80873.5	124899	40602.1	49490.7	25709.4	44294	25046.9	20089.7	49966.1	21991.6	61756.2	-	CM00849	MetMap109
PD0906071	2,3-dihydroxypropyl icosa-11,14-dienoate	0	Lipids	Glycerol ester	C23H42O4	383.32	95.09	382.308	[M+H]+	3	-	-	451528	278606	206382	512460	399947	363689	410751	549282	1.06514e+06	306298	187244	98655	91581.7	243558	43007.4	703826	707803	695095	-	-	-
Wmcp000015	clerodermic acid	0	Terpenoids	Monoterpenoids	C20H28O4	333.21	315.2	332.199	[M+H]+	2	-	-	32286.3	29646.1	5929.21	78718.5	88060.7	86124.5	70188.4	90175.9	84609.3	5929.21	5929.21	5929.21	43471	41064.7	33635.3	36910	71398.1	48061.1	-	-	-
pmp001126	7-Hydroxy-5,6-dimethoxy-1,4-phenanthrenequinone	0	Quinones	PhenAnthraquinones	C16H12O5	285.08	257.08	284.068	[M+H]+	3	-	-	15112	21973.3	28984.8	28305.6	29619.9	44202.3	39423.5	34585.6	41617.6	1939.77	1939.77	1939.77	9698.83	11478.8	10773.9	43458.6	30508.6	23767.1	-	-	-
Lcfp121091	Cyclo(VVFF)	0	Others	Cyclonic peptide	C28H36N4O4	493.28	247.15	492.274	[M+H]+	3	24181-12-2	-	15517.7	19558.5	16373.5	15634.5	18372.5	9983.51	11756.2	9240.43	3525.93	16302.1	18519	15061.7	25452.5	17385.5	17907	9952.51	11505	11257.9	-	-	-
Zbqp003125	Ile-Phe	0	Amino acids and derivatives	Amino acids and derivatives	C15H22N2O3	279.17	86.1	278.163	[M+H]+	3	-	-	182781	232700	154441	91882.2	176493	193869	104363	100964	47193.5	122764	336467	156651	220091	306132	258176	109176	275266	250447	-	-	-
Lmhp008833	LysoPC 16:1(2n isomer)*	0	Lipids	LPC	C24H48NO7P	494.32	184.07	493.317	[M+H]+	3	-	-	246532	265578	225028	166265	114782	137438	8112.99	8112.99	8112.99	104802	40565	71043.5	109598	153696	182599	112829	138713	184280	-	-	-
WapTKC204400	2-(Acetyloxy)-1-Ethylidene-6-Hydroxy-4-Methylidene-7-(Propan-2-Yl)-Octahydro-1H-Inden-5-Yl 3-Methylpent-2-Enoate	0	Terpenoids	Sesquiterpenoids	C23H34O5	391.25	97.06	390.241	[M+H]+	2	-	-	21290	9619.59	10723.6	32161.6	40709	36754.4	42740.3	27092.6	48757	13980.5	11655.4	20154	16394.9	19959.3	14888.8	24835.6	22956.2	28439.5	-	-	-
Cmcp007926	Pinusolidic acid*	0	Terpenoids	Ditepenoids	C20H28O4	333.21	287.2	332.199	[M+H]+	2	40433-82-7	-	24258.5	30557	36655.6	44904.8	54603.7	57960	55132.6	53836.1	63018.9	21234.3	29005.4	12537.1	28032.1	24431.3	16586.7	34169.9	30382.1	49466.4	-	-	-
Zjhp090611	5,7-dihydroxy-3-[(4-methoxyphenyl)methyl]-6-methyl-2,3-dihydrochromen-4-one	0	Flavonoids	Other Flavonoids	C18H18O5	315.12	121.06	314.115	[M+H]+	3	-	-	34612	32607.7	28648.2	31867	59701.3	50009.4	65992.5	55591.1	61130.6	26934.7	19060.5	17014.5	24700.8	40108	18810	22484.8	59130.6	32772.7	-	-	-
Wasdp04146	Tricin-5-O-(6''-O-malonyl)glucoside*	0	Flavonoids	Flavones	C26H26O15	579.14	331.08	578.127	[M+H]+	2	-	-	47985.6	32073.7	34206.4	63971.1	51570.4	55019.8	158832	119098	139768	59495.2	126250	96839.1	69124.9	64611	41117.3	87593.4	57021.2	38873.3	-	-	-
MWSslk108	O-Acetylcarnitine	0	Alkaloids	Alkaloids	C9H17NO4	204.13	85.03	203.116	[M+H]+	3	3040-38-8	C02571	7.75071e+06	6.85465e+06	6.33211e+06	6.02592e+06	7.32266e+06	6.68033e+06	3.76737e+06	4.97503e+06	5.23901e+06	5.87862e+06	5.95613e+06	5.26276e+06	6.33751e+06	7.33671e+06	6.45506e+06	5.71893e+06	6.59416e+06	5.84061e+06	-	C02571	-
MWS201426	Ala-Met	0	Amino acids and derivatives	Amino acids and derivatives	C8H16N2O3S	221.1	133.03	220.088	[M+H]+	3	14486-05-6	-	47036.2	22057.4	49424.9	38134.5	28364.4	51214.8	3836.32	3836.32	3836.32	19181.6	50640	29910.6	47562.1	31173.3	67186	24481	42166.9	47798.8	-	-	-
MWStz572	3,4,3'-Tri-O-methylellagic acid	0	Tannins	Tannin	C17H12O8	345.06	330.04	344.053	[M+H]+	3	1617-49-8	C10836	63099.9	77246.4	57061.8	88693.9	71814.8	95722.7	126746	104198	143794	84648	106544	99922.9	92066.9	40445.6	73247.8	82628.5	62822.8	113464	-	C10836	-
MWStz459	Rhamnocitrin	0	Flavonoids	Flavonols	C16H12O6	301.07	286.05	300.063	[M+H]+	2	569-92-6	C17059	16493.8	14906.8	17087.1	35437.5	28668.1	30777.5	30065.7	37361.7	31445.5	2895.47	2895.47	2895.47	2895.47	2895.47	2895.47	14477.3	20269.5	20294.3	-	C17059	-
WaTKp13362	3-Phenylpropiolaldehyde	0	Others	Aldehyde compounds	C9H6O	131.05	77.04	130.042	[M+H]+	3	2579-22-8	-	22597.3	27388	1842.07	46685.3	41589	26285.1	45772.7	53283.3	51842.2	30038.4	9210.33	18328.3	1842.07	1842.07	1842.07	24611.5	24508.9	32965.3	-	-	-
Cmsp007709	Ephemeranthol B	0	Quinones	PhenAnthraquinones	C16H16O4	273.11	241.09	272.105	[M+H]+	3	130827-44-0	-	6942.56	6962.71	8273.5	14929.8	28168	5517.11	26880.9	20516.3	39405.4	8848.09	19313	15541.6	1103.42	1103.42	1103.42	7441.33	12769.1	16551.3	-	CM02197	MetMap162
MWSslk013	Tectoridin*	0	Flavonoids	Isoflavones	C22H22O11	463.12	301.09	462.116	[M+H]+	2	611-40-5	C10533	114268	182733	125763	120106	96085.3	47761	178408	237847	335818	9552.21	9552.21	9552.21	9552.21	9552.21	9552.21	198342	251413	228804	-	C10533	-
Zbzp007301	2-Methoxy-6-undecyl-1,4-benzoquinone	0	Quinones	Quinones	C18H28O3	293.21	55.05	292.204	[M+H]+	2	-	-	9189.16	7271.58	21256.8	1454.32	1454.32	1454.32	61286.4	51313.3	51477.1	1454.32	1454.32	1454.32	1454.32	1454.32	1454.32	26342.3	23114.5	26331.4	-	-	-
Wdjp009070	2,4-Bis(4-hydroxybenzyl)-3-(3-hydroxyphenethyl)-5-methoxyphenol	0	Others	Others	C29H28O5	457.2	107.05	456.194	[M+H]+	3	-	-	1446.17	1446.17	1446.17	1446.17	1446.17	1446.17	7230.85	19736	9724.19	1446.17	1446.17	1446.17	1446.17	1446.17	1446.17	15304.9	17307.5	10253	-	-	-
MWS2430	13-methylmyristic acid	0	Lipids	Free fatty acids	C15H30O2	241.22	241.21	242.225	[M-H]-	1	2485-71-4	-	129658	160426	132909	96631.9	86510.1	87473.2	76665.8	97775	89283.6	152507	132851	147375	129020	140803	127859	106014	119402	120892	-	-	-
Wmqn000820	Dehydrololiolide	0	Terpenoids	Monoterpenoids	C11H14O3	193.09	163.04	194.094	[M-H]-	1	19355-58-9	-	226669	215432	191361	117353	140250	133404	37156.2	35103.1	39155	126094	118144	127761	112701	148172	109685	131602	109672	111160	-	-	-
Zmyn004449	9-Hydroxy-12-oxo-10(E),15(Z)-octadecadienoic acid	0	Lipids	Free fatty acids	C18H30O4	309.21	171.1	310.214	[M-H]-	1	-	C21923	17924.3	19250.3	17538	23374.4	22763.4	21140	30282.1	34390.7	28462.6	10297.2	11579.3	14958.5	20915	17935.5	22028.6	19553.9	21264.8	19715.1	ko00592,ko01110	C21923	-
Walbn07068	15-Amino-15-oxopentadecanoic acid	0	Lipids	Free fatty acids	C15H29NO3	270.21	253.18	271.215	[M-H]-	3	-	-	137006	189016	157283	120999	149263	145057	140264	122941	110217	174979	176015	146317	187105	198217	172527	115228	130237	143140	-	-	-
Lmdn003756	Methyl caffeate	0	Phenolic acids	Phenolic acids	C10H10O4	193.05	135.05	194.058	[M-H]-	3	3843-74-1	C10477	176080	218915	177895	111515	105755	101912	35510.7	35461	32646.8	111108	128357	132605	115844	117563	97612.7	102206	95214.2	90604.9	-	C10477	MetMap166,MetMap168,MetMap170
Lmbn009444	Ricinoleic acid	0	Lipids	Free fatty acids	C18H34O3	297.24	183.14	298.251	[M-H]-	1	141-22-0	C08365	36349.5	33222.2	42726.9	40272	38577.4	38210.6	45010.5	41840.5	49818.3	38760.9	32915.1	36722.9	32211.8	34279.1	34185.8	37030.8	42886.9	41108	-	C08365	-
mws0359	Pentadecanoic acid	0	Lipids	Free fatty acids	C15H30O2	241.22	241.22	242.225	[M-H]-	2	1002-84-2	C16537	121387	150480	116741	93988.1	74248.7	80097.4	74833.3	92566.3	82182.8	129672	120123	149414	123146	132856	117617	110538	112162	119949	-	C16537	-
Hmyn000254	Tababiphenyl C	0	Others	Chromone	C18H18O4	297.12	59.01	298.12	[M-H]-	2	1644433-50-0	-	183668	164093	213688	387179	317545	260553	392296	369207	358225	199129	304331	264528	216568	229573	205726	237242	231572	307943	-	-	-
Lmln007483	6,9,10-Trihydroxyoctadec-7-enoic acid; Sanleng acid	0	Lipids	Free fatty acids	C18H34O5	329.23	171.1	330.241	[M-H]-	1	-	-	858606	892779	802345	1.92686e+06	1.87774e+06	1.90844e+06	1.75419e+06	1.85784e+06	1.95821e+06	1.02177e+06	1.06658e+06	1.07306e+06	1.13649e+06	1.21846e+06	1.17338e+06	1.37258e+06	1.37131e+06	1.27164e+06	-	-	-
mws0473	2-Methylsuccinic acid*	0	Organic acids	Organic acids	C5H8O4	131.03	87.05	132.042	[M-H]-	3	498-21-5	-	399994	344750	304997	284660	264495	237683	459861	486365	450691	197217	187802	201478	256015	255040	277781	292091	313930	270934	-	-	-
pmf0073	Campesterol	0	Steroids	Steroid	C28H48O	399.36	235	400.37	[M-H]-	3	474-62-4	C01789	849891	822559	857998	817075	807304	836666	854203	846174	878699	820383	829728	811046	840305	804751	798085	831800	867854	864600	ko00100,ko00905,ko01100,ko01110	C01789	-
Wasn002329	Xanthurenic Acid 8-O-Glucoside	0	Alkaloids	Quinoline alkaloids	C16H17NO9	366.08	160.04	367.09	[M-H]-	1	97451-32-6	-	53441.2	34375.7	34927.5	33524.7	41391	36008.8	54369.4	41564.8	47345.1	33323.9	34756.8	24969.1	27809.1	31576.2	33416.4	33667.7	30773.2	29956.6	-	-	-
pme2529	1,5-Anhydro-D-glucitol	0	Others	Saccharides	C6H12O5	163.06	101.02	164.069	[M-H]-	3	154-58-5	C07326	1.85865e+06	1.8404e+06	1.6215e+06	2.68864e+06	2.76632e+06	2.77958e+06	2.80663e+06	2.6958e+06	2.90296e+06	1.54496e+06	1.89834e+06	1.83067e+06	1.39101e+06	1.26329e+06	1.28728e+06	1.99423e+06	2.07769e+06	1.9327e+06	-	C07326	-
pme3382	N-Acetyl-L-threonine	0	Amino acids and derivatives	Amino acids and derivatives	C6H11NO4	160.06	98.02	161.069	[M-H]-	3	17093-74-2	-	29794.2	35405.2	35570.6	39169.2	42683.7	60371.9	65796.2	50269.4	53506.6	41869.4	55223.8	43207.8	37483.7	33813.4	50030.8	36743	48287.8	28576.2	-	-	-
Lmmn000806	Dimethylmalonic acid*	0	Organic acids	Organic acids	C5H8O4	131.03	87.05	132.042	[M-H]-	3	595-46-0	-	13516.6	38356	25109.2	26489.3	28739.6	27122.2	40363	41520	44900.7	15184.7	15659	18167.9	22323.3	26459.7	12188	31710.8	18266.1	17936.4	-	-	-
Smnn005025	Schisphenthin B	0	Terpenoids	Triterpene	C30H46O6	501.32	501.32	502.329	[M-H]-	2	-	-	57100.5	40333.9	48843.4	44402	54315.4	51007.3	42525.7	41470.6	94877.7	30700	19540.4	9020.39	15227.3	25691.9	10940	64867.2	74140.5	67319.3	-	-	-
Lmbn001288	(S)-2-Acetolactate	0	Organic acids	Organic acids	C5H8O4	131.03	87.04	132.042	[M-H]-	3	71698-08-3	C06010	22039.3	27860.9	24195.3	19059.4	21218.5	17689.3	35716.9	39631.2	33521.1	14049.5	10300.1	18678.6	20244	12552.1	14087.4	22502.1	15573.9	23420.4	ko00290,ko00650,ko00660,ko00770,ko01100,ko01110,ko01210,ko01230	C06010	-
HJN104	Dihydromyricetin-3-O-glucoside	0	Flavonoids	Flavanonols	C21H22O13	481.14	319.08	482.106	[M-H]-	2	-	-	31681.1	39129.8	31413.2	24018.4	31859.6	32572.4	36613.2	32124.7	18330.2	43443.8	44939.6	38296.2	36874.3	40721.8	44581.8	37957.4	38537.6	40759.9	-	CM00808	MetMap109
pme3188	UMP*	0	Nucleotides and derivatives	Nucleotides and derivatives	C9H13N2O9P	323.03	211	324.036	[M-H]-	3	58-97-9	C00105	65161.6	57529.6	87111.6	73302.7	65131.6	51805.3	22940.3	27041.2	44553.8	57376.4	58549.8	61162.9	38566.8	52798.4	72677.9	51462.3	61039.9	62544.9	ko00240,ko01100,ko01232,ko01240	C00105	-
Safn002073	Glu-Leu	0	Amino acids and derivatives	Amino acids and derivatives	C11H20N2O5	259.13	130.09	260.137	[M-H]-	3	5969-52-8	-	18950.4	39238.7	31916.9	21796.5	30046.2	21625.2	10728.8	16664.2	12197.1	25519.8	42769.6	40397.9	23688.8	35855.6	45168	23700.7	23777	25504.2	-	-	-
Wbmn011437	Vitexilactone C	0	Terpenoids	Ditepenoids	C20H30O3	317.21	317.21	318.219	[M-H]-	2	-	-	16083.9	15468.8	13988.2	22179.9	20399	23203.9	30080.2	30083.9	19515.1	2145.02	2145.02	2145.02	2145.02	2145.02	2145.02	11752.5	10725.1	11302.1	-	-	-
Ymln108520	Aloesaponol Ⅲ	0	Quinones	Quinones	C15H14O4	257.08	257.09	258.089	[M-H]-	2	64284-37-3	-	21780.5	28904.9	37170.6	8695.66	17568.5	15274.2	1739.13	1739.13	1739.13	14765.4	17336.3	8931.69	19156.5	15563.4	16048	15939.9	18654.3	22859.9	-	-	-

## Sheet: Comprehensive analysis of hubs
Compound Name	Chemical Classification	Major Source / Application Target	Core Biological / Ecological Function	Key Mechanism & Research Significance	References
Difenoconazole	Triazole Fungicide(Sterol Demethylation Inhibitor)	Targets:Cereals, vegetables (crucifers), root crops.	Disease Control:Broad-spectrum antifungal with systemic, curative, and protective action.Physiological Impact:Triggers plant oxidative stress response (upregulates SOD/CAT activity).	Mechanism: Binds to fungal CYP51 enzyme, blocking ergosterol biosynthesis and disrupting cell membranes.Significance: Efficient agricultural intervention, though non-target growth inhibition effects require monitoring.	1,2,3
2-(2,3-dihydroxypropoxy)-3-(((2-(dimethylamino)ethoxy)(hydroxy)phosphoryl)oxy)propan-2-yl (Z)-14-Octadecenoic Acid	Phosphatidyl-N,N-dimethylethanolamine Derivative (PtdDMEA)	Plant Source:Mature seeds of Papaya (Carica papaya), Cerbera manghas.	Membrane System Maintenance:Maintains cell membrane fluidity and stability under stress conditions.	Mechanism: Acts as a key intermediate in the methylation pathway for phosphatidylcholine (PC) synthesis.Significance: Reveals specific patterns of fatty acid accumulation during the seed maturation process of certain plants.	4,5,6,7
Ephemeranthoquinone B	Phenanthrenequinone	Plant Source:Endemic to Orchidaceae (e.g., Dendrobium, Cymbidium, Vanda).	Chemical Defense:Acts as a phytoalexin against environmental microbial invasion.Pharmacological Activity:Significant cytotoxicity (anticancer) and activity against Gram-positive bacteria.	Mechanism: Generates Reactive Oxygen Species (ROS) via its quinone structure, inducing apoptosis.Significance: A chemotaxonomic marker for orchids, revealing the chemical mechanisms of epiphytic adaptation to humid environments.	8,9,10,11,12,13,14,15
Abealpha1-3Manalpha	3,6-Dideoxyhexose(Sugar Antigen)	Source:Plant soft rot pathogen Pectobacterium aquaticum.	Immune Recognition & Evasion:Component of Lipopolysaccharide (LPS) O-antigen, forming a dense hydrophilic barrier.	Mechanism: Modifies bacterial surface structures to protect against plant antimicrobial peptides (AMPs) and evade recognition by plant Pattern Recognition Receptors (PRRs).Significance: Challenges traditional views on the antigen differences between animal and plant pathogens; serves as a biosafety marker for irrigation water.	16,17,18,19
2,6-Dimethoxy-4-hydroxyphenol-1-O-ß-D-glucopyranoside	Phenolic Glycoside	Plant Source:Widely distributed (Rubiaceae, Asteraceae, Polygonaceae), e.g., Buckwheat, Morinda officinalis.	Multiple Activities:Antioxidant and anti-inflammatory support; allelopathy (suppresses weed growth).	Mechanism: Hydrolysis releases phenolic hydroxyl groups that scavenge free radicals.Significance: As secondary metabolites, they enhance plant competitiveness through synergistic effects and contribute to the health benefits of medicinal plants.	20,21,22,23
19-Norandrographolide C	Norditerpenoid	Plant Source:Andrographis paniculata (Green Chiretta).	Synergistic Efficacy:May enhance the bioavailability or activity of main components (like andrographolide) via the "entourage effect."	Mechanism: Involves specific oxidative decarboxylation modifications.Significance: Demonstrates the structural diversity of diterpene oxidative modifications, serving as chemical evidence of plant adaptive evolution.	24
1	Difenoconazole (Ref: CGA 169374) - AERU - University of Hertfordshire.		https://sitem.herts.ac.uk/aeru/ppdb/en/Reports/230.htm
2	Difenoconazole | C19H17Cl2N3O3 | CID 86173 – PubChem.		https://pubchem.ncbi.nlm.nih.gov/compound/Difenoconazole
3	Chitosan enhances low-dosage difenoconazole to efficiently control leaf spot disease in Pseudostellaria heterophylla (Miq.) Pax.		https://doi.org/10.3390/molecules28166170
4	Comparative fatty acids profiling and antioxidant potential of pawpaw and watermelon seed oils.		https://doi.org/10.9734/BJPR/2016/27974
5	Phosphatidylcholine synthesis: differing patterns in soybean and carrot.		https://doi.org/10.1104/pp.88.3.854
6	Functional characterization of phospholipid N-methyltransferases from Arabidopsis and soybean.		https://doi.org/10.1074/jbc.M109.005991
7	Cloning and functional identification of phosphoethanolamine methyltransferase in soybean (Glycine max)		https://doi.org/10.3389/fpls.2021.612158
8	Constituents of Ephemerantha lonchophylla; Isolation and Structure Elucidation of New Phenolic Compounds, Ephemeranthol-A, Ephemeranthol-B, and Ephemeranthoquinone, and of a New Diterpene Glucoside, Ephemeranthoside.		https://doi.org/10.1248/cpb.39.593
9	Phenantrenes from Dendrobium plicatile.		https://doi.org/10.1016/S0031-9422(99)00497-5
10	Phytochemical analysis and dermo-cosmetic evaluation of Cymbidium sp. (Orchidaceae) cultivation by-products.		https://doi.org/10.3390/antiox11010101
11	Cytotoxic Phenanthrenequinones and 9,10-Dihydrophenanthrenes from Calanthe arisanensis.		https://doi.org/10.1021/np800622a
12	Phenanthrene derivatives from Cymbidium great flower marie laurencin and their biological activities.		https://doi.org/10.1021/np200788u
13	Medicinal use, flower trade, preservation and mass propagation techniques of Cymbidium orchids-an overview.		https://doi.org/10.3390/horticulturae9060690
14	Phytochemicals from Vanda bensonii and their bioactivities to inhibit growth and metastasis of non-small cell lung cancer cells.		https://doi.org/10.3390/molecules27227902
15	Ethnobotany and the role of plant natural products in antibiotic drug discovery.		https://doi.org/10.1021/acs.chemrev.0c00922
16	3-O-alpha-abequopyranosyl-alpha-D-mannopyranose | C12H22O9 | CID 46878556.		https://pubchem.ncbi.nlm.nih.gov/compound/46878556
17	Comparative immunogenicity and efficacy of equivalent outer membrane vesicle and glycoconjugate vaccines against nontyphoidal Salmonella.		https://doi.org/10.1073/pnas.1807655115
18	The first polish isolate of a novel species Pectobacterium aquaticum originates from a pomeranian lake.		https://doi.org/10.3390/ijerph18095041
19	The structure of an abequose - containing O-polysaccharide isolated from Pectobacterium aquaticum IFB5637.		https://doi.org/10.1016/j.carres.2022.108696
20	Chemical constituents from Sphagneticola trilobata.		https://doi.org/10.1007/s10600-024-04483-4
21	Chemical constituents from the stems of Dendrotrophe frutescens.		https://doi.org/10.1016/j.bse.2013.08.022
22	Three new and antitumor anthraquinone glycosides from Lasianthus acuminatissimus MERR.		https://doi.org/10.1248/cpb.54.297
23	Pharmacological effects of Aquilaria spp. leaves and their chemical constituents.		https://doi.org/10.1007/978-981-10-0833-7_8
24	Andrographis paniculata (Burm. f.) Wall. ex Nees: a review of ethnobotany, phytochemistry, and pharmacology.		https://doi.org/10.1155/2014/274905
