# Supplementary material
Source: Research Square preprint supplement (doi:10.21203/rs.3.rs-9040343/v1)
Supplement: Supplementary file 2 [file 31afceb3b901ed4720156046.xlsx]

## Sheet: Note
	Note:
		Top metabolites selected by Euclidean distance (located on the left)
		Top metabolites selected by Euclidean distance (located on the right)

## Sheet: Common metabolites
Index	Compounds	Class I	Class II	Formula	Q1 (Da)	Q3 (Da)	Molecular weight (Da)	Ionization model	Level	CAS	cpd_ID	120DAI_1	120DAI_2	120DAI_3	180DAI_1	180DAI_2	180DAI_3	240DAI_1	240DAI_2	240DAI_3	300DAI_1	300DAI_2	300DAI_3	360DAI_1	360DAI_2	360DAI_3	QC01	QC02	QC03	kegg_map	mw_cpd_ID	mw_map
Zbsp004438	Quercetin-3,4'-O-di-glucoside	Flavonoids	Flavonols	C27H30O17	627.16	303.05	626.148	[M+H]+	1	29125-80-2	-	367670	212523	424047	127962	189517	176384	2.85034e+06	3.20732e+06	2.25257e+06	859156	1.02476e+06	1.6612e+06	1.14634e+07	1.15153e+07	1.2403e+07	2.01624e+06	1.68678e+06	2.15985e+06	-	CM00614	MetMap115,MetMap116
Lahp003599	Homoeriodictyol-7,4'-di-O-β-D-glucopyranoside	Flavonoids	Flavanones	C28H34O16	627.19	303.09	626.185	[M+H]+	3	-	-	442029	523175	477717	88405.7	88405.7	88405.7	3.42428e+06	3.43545e+06	2.50852e+06	1.03374e+06	1.75326e+06	1.85199e+06	8.59764e+06	7.1871e+06	8.38017e+06	2.07063e+06	2.3311e+06	1.93352e+06	-	-	-

## Sheet: Pink
Index	MM	MM.p	GS	GS.p	Compounds	Class I	Class II	Formula	Q1 (Da)	Q3 (Da)	Molecular weight (Da)	Ionization model	Level	CAS	cpd_ID	120DAI_1	120DAI_2	120DAI_3	180DAI_1	180DAI_2	180DAI_3	240DAI_1	240DAI_2	240DAI_3	300DAI_1	300DAI_2	300DAI_3	360DAI_1	360DAI_2	360DAI_3	QC01	QC02	QC03	kegg_map	mw_cpd_ID	mw_map
Hmdp009461	0.883041	1.29e-05	0.648605	0.00890546	Shancidin	Quinones	PhenAnthraquinones	C21H18O3	319.13	107.05	318.126	[M+H]+	3	-	-	161074	144861	109963	215869	193236	220789	179697	165294	151721	207429	243740	253499	169626	190916	186007	178912	177883	197121	-	-	-
Hmhp005160	0.866637	2.91e-05	0.832928	0.000115688	Rehderianin I*	Flavonoids	Flavones	C17H14O7	331.07	316.05	330.074	[M+H]+	1	90965-30-3	-	1.33163e+06	1.07373e+06	1.12065e+06	1.68228e+06	1.98535e+06	2.22224e+06	1.63289e+06	1.77297e+06	1.865e+06	2.47537e+06	2.27981e+06	2.11507e+06	1.93492e+06	2.29215e+06	1.84601e+06	2.14928e+06	2.14321e+06	2.2936e+06	-	-	-
Jmzp008184	0.808347	0.000265086	0.718482	0.00254851	Rel-(8S,8'R)-Dimethyl-(7S,7'R)-bis(5-hydroxy-3-methoxyphenyl)tetrahydrofuran	Lignans and Coumarins	Lignans	C20H24O5	345.17	137.06	344.162	[M+H]+	3	-	-	140456	53939.1	143527	248920	184179	260815	126465	202435	231498	271354	240491	314509	228948	214534	207933	234627	207101	95895.8	-	-	-
Layp006138	0.816273	0.000205595	0.70674	0.00322065	5-Hydroxy-3',4',7-trimethoxyflavone glucoside*	Flavonoids	Flavones	C24H26O11	491.16	329.1	490.147	[M+H]+	2	-	-	5262.95	5262.95	39947	65854.6	73361.1	26314.8	52907.2	38204.5	64275.3	91386.2	75314.7	73722.5	52287.2	50864.3	38920.3	55361	76119.5	85511	-	-	-
Lazp007726	0.930225	5.06e-07	0.725716	0.00219382	Tupichinol E	Flavonoids	Flavonols	C17H14O6	315.09	300.06	314.079	[M+H]+	2	-	-	532294	450803	573203	1.40215e+06	1.00203e+06	1.08411e+06	1.08348e+06	943011	917600	1.65421e+06	1.33067e+06	1.53162e+06	755095	1.0751e+06	922016	1.21401e+06	865809	1.14635e+06	-	-	-
Lcfp121253	0.889952	8.85e-06	0.883286	1.28e-05	Phe-Val-Val	Amino acids and derivatives	Amino acids and derivatives	C19H29N3O4	364.22	120.08	363.216	[M+H]+	3	-	-	1.49315e+06	1.43932e+06	1.18623e+06	2.32384e+06	2.20419e+06	2.29444e+06	1.93077e+06	1.86522e+06	2.07077e+06	2.69662e+06	2.93845e+06	3.13904e+06	2.21424e+06	2.6283e+06	2.42694e+06	2.34399e+06	2.22528e+06	2.34241e+06	-	-	-
Lmbn001181	0.841877	8.28e-05	0.609875	0.0157754	Fraxetin-7,8-di-O-glucoside	Lignans and Coumarins	Coumarins	C22H28O15	531.14	531.13	532.143	[M-H]-	3	-	-	120560	121737	105182	168528	134536	144658	139919	148710	126760	163456	162503	183716	126706	148205	119291	141661	137412	138430	-	-	-
Lmgn003755	0.922448	9.87e-07	0.742827	0.00151052	5,7-Dihydroxy-2'-methoxy-3',4'-methyleneoxydihydroisoflavone	Flavonoids	Isoflavones	C17H14O7	329.07	299.02	330.074	[M-H]-	3	-	-	336069	243888	294746	475417	517793	547490	443313	408517	430398	571448	562611	535567	444203	556417	403068	533077	516434	499537	-	-	-
Lmhp008744	-0.863429	3.37e-05	-0.633227	0.0112737	1-α-Linolenoyl-glycerol-2,3-di-O-glucoside*	Lipids	Glycerol ester	C33H56O14	677.37	261.22	676.367	[M+H]+	1	-	-	51562.2	34785.8	30664.6	12039.9	13109.9	11998.7	24742.5	17385.3	26233.3	2399.75	2399.75	2399.75	32080.5	32537.2	12183.5	31090.1	35908.2	25821.2	-	-	-
Lmjp005871	0.913712	1.93e-06	0.828339	0.000136358	Penduletin (5,4'-Dihydroxy-3,6,7-trimethoxyflavone)*	Flavonoids	Flavonols	C18H16O7	345.1	312.06	344.09	[M+H]+	1	569-80-2	-	5.55238e+06	5.67441e+06	4.6955e+06	9.61253e+06	8.48229e+06	8.18002e+06	8.515e+06	8.01912e+06	7.98989e+06	1.27919e+07	1.04091e+07	1.04603e+07	7.84552e+06	9.45776e+06	8.05977e+06	8.24591e+06	6.72723e+06	7.88538e+06	-	-	-
Lmsn002887	0.817951	0.00019453	0.877355	1.74e-05	1-O-Caffeoyl-β-D-xylose	Phenolic acids	Phenolic acids	C14H16O8	311.08	163.04	312.084	[M-H]-	2	-	-	1887.06	1887.06	1887.06	9435.28	23482.5	28798.5	24928.4	20320.9	20439.6	37958	56038.2	35036.6	32690.4	31374.7	20861.4	27358.9	18585.2	17031.3	-	CM02644	MetMap168
Lmsp008392	0.957572	2.13e-08	0.68781	0.00459521	4',5-Dihydroxy-3',5'-dimethoxyflavone	Flavonoids	Flavones	C17H14O6	315.09	272.07	314.079	[M+H]+	1	-	-	76766.2	76766.2	76766.2	713999	756484	622257	594162	554965	560279	676209	831300	803512	450960	383831	453612	489132	541711	583174	-	-	-
ML10171848	-0.893489	7.22e-06	-0.705037	0.00332892	D-Arabinono-1,4-lactone	Others	Saccharides	C5H8O5	147.03	85.03	148.037	[M-H]-	1	2782-09-04	C00652	235973	220797	216592	122404	121379	148813	105986	116543	94149.1	75557.7	77877.1	85987.7	173941	165211	175009	155039	150422	140978	ko00053,ko01100	C00652	-
mws0018	-0.851272	5.69e-05	-0.664389	0.0068988	Spermine	Alkaloids	Alkaloids	C10H26N4	203.22	84.08	202.216	[M+H]+	3	71-44-3	C00750	7.68968e+06	7.84742e+06	7.71753e+06	5.74063e+06	5.10809e+06	5.85709e+06	4.78434e+06	6.4666e+06	4.74956e+06	4.53512e+06	4.86939e+06	4.81592e+06	5.53357e+06	6.62344e+06	7.11987e+06	6.2821e+06	5.59393e+06	4.22402e+06	ko00330,ko00410,ko00480,ko00770,ko01100,ko01240	C00750	-
mws0628	-0.836669	0.000100811	-0.745051	0.00143604	4-Hydroxybenzaldehyde	Others	Aldehyde compounds	C7H6O2	121.03	92.03	122.037	[M-H]-	1	123-08-0	C00633	1.66204e+06	1.99338e+06	1.77348e+06	1.19002e+06	1.20994e+06	1.14649e+06	1.42081e+06	1.71576e+06	1.24483e+06	1.17861e+06	972457	1.17027e+06	1.15799e+06	1.22051e+06	1.24782e+06	1.44837e+06	1.33401e+06	1.43301e+06	ko01100	C00633	MetMap163,MetMap164
mws0917	0.848393	6.4e-05	0.633778	0.0111811	3,7-Di-O-methylquercetin*	Flavonoids	Flavonols	C17H14O7	329.07	314.04	330.074	[M-H]-	3	2068-02-02	C01265	299873	286149	247573	548305	531558	518880	394621	420656	366116	598745	509542	453992	463903	544739	384579	505377	543760	481810	ko00944,ko01110	C01265	MetMap117
mws1526	0.89766	5.63e-06	0.780365	0.000597846	Sweroside	Terpenoids	Monoterpenoids	C16H22O9	359.13	197.08	358.126	[M+H]+	3	14215-86-2	C17071	1.72741e+06	1.40871e+06	1.45154e+06	3.29511e+06	3.81562e+06	2.88503e+06	2.69206e+06	3.26289e+06	3.19384e+06	3.68718e+06	4.63756e+06	3.71122e+06	2.35339e+06	3.77156e+06	3.21418e+06	2.75828e+06	2.66799e+06	2.39525e+06	-	C17071	-
MWS201054	-0.844218	7.56e-05	-0.826049	0.000147758	O-Acetyl-L-homoserine	Amino acids and derivatives	Amino acids and derivatives	C6H11NO4	162.08	56.05	161.069	[M+H]+	3	250736-84-6	C01077	322938	321074	326834	257534	266818	215297	244471	283060	279890	165919	207223	237575	242240	232025	244040	228283	258064	272118	ko00270,ko01100	C01077	-
MWS2442	-0.83281	0.000116186	-0.793482	0.000414542	D-Fructose 6-phosphate*	Others	Saccharides	C6H13O9P	259.02	96.97	260.03	[M-H]-	1	643-13-0	C00085	971653	1.09384e+06	997739	781410	764296	680626	848441	848102	782899	665763	746344	714968	801113	668334	722637	922322	841724	983945	ko00010,ko00030,ko00051,ko00052,ko00500,ko00520,ko00710,ko01100,ko01110,ko01200,ko01230,ko01240,ko01250	C00085	-
MWS2910	-0.827006	0.000142903	-0.891001	8.34e-06	5-Methyl-2'-deoxycytidine	Nucleotides and derivatives	Nucleotides and derivatives	C10H15N3O4	242.11	126.07	241.106	[M+H]+	3	838-07-3	C03592	176333	163651	183425	130758	121098	128771	105649	129407	143576	88829.6	77152.9	53021.3	96862.7	131768	107660	141672	101715	115769	-	C03592	-
MWSmce083	-0.907617	2.97e-06	-0.915303	1.72e-06	Ferulic acid methyl ester*	Phenolic acids	Phenolic acids	C11H12O4	207.07	133.03	208.074	[M-H]-	3	22329-76-6	-	384399	344078	329235	218930	224404	246492	249017	264419	248559	123492	112190	127745	210527	202881	215197	253818	256305	243731	-	-	-
MWSprf094	0.921582	1.06e-06	0.767267	0.000841825	Tracheloside	Lignans and Coumarins	Lignans	C27H34O12	549.2	387.14	550.205	[M-H]-	3	33464-71-0	-	3328.87	3328.87	3328.87	28175.9	27902.9	29015.7	36036.1	21217.2	31486.6	46720.8	42618.5	34314.7	16644.4	21030.4	25932.4	25426	30515.4	34056.8	-	-	-
MWStz503	-0.910598	2.41e-06	-0.632479	0.0114004	alpha-Chaconine	Alkaloids	Steroid alkaloids	C45H73NO14	852.51	852.53	851.503	[M+H]+	3	20562-03-2	C10796	473488	646995	650419	268235	206178	336724	469815	509045	414973	41235.6	41235.6	41235.6	385978	419763	575563	312885	381212	322760	-	C10796	-
PD0462863	0.914234	1.86e-06	0.906778	3.14e-06	2-aminooctadec-12-ene-1,3,4-triol*	Lipids	Sphingolipids	C18H37NO3	316.29	60.04	315.277	[M+H]+	1	-	-	5.37581e+06	5.24203e+06	4.06306e+06	7.88927e+06	7.08016e+06	7.95778e+06	7.35732e+06	7.29773e+06	7.53129e+06	9.44733e+06	9.86346e+06	1.01846e+07	8.11225e+06	8.11886e+06	7.61671e+06	7.5224e+06	7.91968e+06	7.16011e+06	-	-	-
PDP018262	-0.874308	2.02e-05	-0.855324	4.8e-05	(2-aminoethoxy)[2-hydroxy-3-(octadeca-9,12,15-trienoyloxy)propoxy]phosphinic acid*	Lipids	LPE	C23H42NO7P	476.28	335.26	475.27	[M+H]+	1	-	-	236373	279595	230567	176279	181261	181713	185615	206285	151375	96389	93320.6	143704	189198	155218	167293	167549	221919	150780	-	-	-
PDP035942	0.921652	1.05e-06	0.86493	3.15e-05	6-{[3,4-dihydroxy-6-(hydroxymethyl)-5-[(3,4,5-trihydroxy-6-methyloxan-2-yl)oxy]oxan-2-yl]oxy}-5-hydroxy-7-methoxy-2-(4-methoxyphenyl)-4H-chromen-4-one*	Flavonoids	Flavones	C29H34O15	623.2	315.09	622.19	[M+H]+	1	-	-	336277	295399	271113	858884	765496	798325	809538	960654	776079	1.45044e+06	1.43041e+06	1.46106e+06	720561	816549	797785	770710	783652	868392	-	-	-
PDP060686	0.860366	3.86e-05	0.842002	8.24e-05	6-hydroxysphingosine*	Lipids	Sphingolipids	C18H37NO3	316.29	60.04	315.277	[M+H]+	1	-	-	3.8562e+06	3.88879e+06	2.39662e+06	4.81565e+06	4.77694e+06	4.72682e+06	4.55255e+06	4.60431e+06	3.99308e+06	6.22871e+06	6.04713e+06	6.5994e+06	4.82483e+06	5.10095e+06	4.89616e+06	4.1206e+06	4.48004e+06	4.27065e+06	-	-	-
PDP073410	0.883581	1.26e-05	0.724849	0.00223408	10,13-dimethyl-3-oxo-1,2,8,9,11,12,14,15,16,17-decahydrocyclopenta[a]phenanthrene-16-carboxylic acid	Terpenoids	Ditepenoids	C20H26O3	315.2	269.19	314.188	[M+H]+	2	-	-	12058.2	12058.2	12058.2	112606	105348	160044	80097.3	60290.8	86667	172846	152002	99345.9	84912.5	110113	115534	91884.5	95785.1	116564	-	-	-
PDP172320	0.953931	3.61e-08	0.670295	0.00624715	homoferreirin-7-O-glucoside-6''-malonate	Flavonoids	Isoflavones	C26H28O14	565.15	317.1	564.148	[M+H]+	3	-	-	40683.9	33425.1	33886.4	95749.2	99248.1	86781.5	59781.1	85143.4	66509.5	126987	127856	127559	56030.1	62323.7	61867.8	79122.7	74635	80645.6	-	-	-
PDP239459	-0.97265	1.27e-09	-0.643913	0.00958223	Phosphatidylcholine lyso 18:3	Lipids	LPC	C26H48NO7P	518.32	184.08	517.317	[M+H]+	1	-	-	1.83871e+06	2.07337e+06	1.76921e+06	899628	835792	874429	1.10068e+06	1.33116e+06	1.24837e+06	444273	517816	542489	1.48749e+06	1.47146e+06	1.52338e+06	1.47865e+06	1.46089e+06	1.42577e+06	-	-	-
pmb0865	-0.968894	2.91e-09	-0.660839	0.00731555	LysoPC 18:3(2n isomer)*	Lipids	LPC	C26H48NO7P	518.32	184.07	517.317	[M+H]+	1	-	-	1.84696e+06	1.81709e+06	1.65622e+06	856135	846377	860210	1.08999e+06	1.2748e+06	1.16398e+06	467502	449997	486849	1.35412e+06	1.48206e+06	1.36897e+06	1.47224e+06	1.26789e+06	1.43032e+06	-	-	-
pmb2620	-0.882303	1.34e-05	-0.920981	1.11e-06	3,4-Dimethoxycinnamic acid*	Phenolic acids	Phenolic acids	C11H12O4	207.07	133.07	208.074	[M-H]-	3	2316-26-9	-	172797	174060	149009	100632	111657	102621	114922	123053	120213	45045.2	62823.5	54087.5	87031.8	87428.2	95056.9	118520	120507	124313	-	-	-
pme3154	-0.909004	2.7e-06	-0.747896	0.0013451	(R)-Mevalonate	Organic acids	Organic acids	C6H12O4	147.07	59.01	148.074	[M-H]-	3	150-97-0	C00418	116481	115245	126118	66601.9	56937.8	68753.5	60089.8	66286.7	45342.7	33057.2	53296.1	45256.5	83460	75613.8	83083.2	84996	97359.7	78401.7	ko00900,ko01100,ko01110	C00418	-
pmp000570	0.912278	2.14e-06	0.656872	0.0078044	Odoricarpan	Flavonoids	Isoflavones	C18H18O6	331.12	165.05	330.11	[M+H]+	3	-	-	570813	368166	414584	1.07835e+06	866399	774297	927465	799354	783688	964307	1.31272e+06	1.10871e+06	646466	760137	625816	812214	845691	794175	-	-	-
pmp001270	-0.818167	0.000193139	-0.731363	0.00194539	LysoPC 16:1*	Lipids	LPC	C24H48NO7P	494.32	184.07	493.317	[M+H]+	3	76790-27-7	-	232470	424715	208635	125766	113954	140155	183587	188036	156945	74155.4	77507.2	84975.4	135801	113460	159551	210206	195592	255604	-	-	-
Qmhp111704	0.863537	3.36e-05	0.611998	0.0153167	Pittogoside B*	Lignans and Coumarins	Lignans	C26H32O11	521.2	131.05	520.194	[M+H]+	2	-	-	35359.9	33476.6	20613.6	68774.5	99948.8	76573.9	58363	61629.3	73735.3	76330.9	81590.9	125769	63739.8	53434.4	53557.9	80234	74403.9	64817.5	-	-	-
Rfmb087	-0.959757	1.52e-08	-0.773174	0.000723381	9-Hydroxy-13-oxo-10-octadecenoic Acid	Lipids	Free fatty acids	C18H32O4	311.22	293.21	312.23	[M-H]-	3	-	-	149975	162832	131876	87159.8	67913.8	81789.6	84302.8	84579.2	88057	31390.1	34873.6	41564.7	99790.5	106416	106237	83863	96466.2	90311.7	-	-	-
Rfn07755	0.877096	1.76e-05	0.787167	0.000495991	4,5-Dihydroxy-1,2-dimethoxy-7-methylanthracene-9,10-dione	Quinones	Anthraquinone	C17H14O6	315.08	300.06	314.079	[M+H]+	1	89701-79-1	-	383289	435973	337739	858718	666148	734591	670615	685626	669765	1.22512e+06	973412	1.2955e+06	807961	767264	510300	719028	751640	1.05177e+06	-	-	-
Sadp017169	-0.880703	1.46e-05	-0.874641	1.99e-05	Dinortrixagone	Terpenoids	Sesquiterpenoids	C18H28O	261.22	121.1	260.214	[M+H]+	1	-	-	102616	140673	99145.7	42441.4	44784.2	41662.2	58009.7	58180	82146.2	5162.75	5162.75	5162.75	25813.7	29509.8	46358.6	39241.9	68915.7	51098.9	-	-	-
Safn010049	0.92437	8.42e-07	0.747437	0.00135947	Apometzgerin	Flavonoids	Flavones	C17H14O7	329.07	271.02	330.074	[M-H]-	3	76900-87-3	-	162935	150685	125734	235396	285428	267826	241972	198512	230534	258124	348434	312242	211430	260656	234940	266999	276125	273361	-	-	-
Safp010408	-0.936562	2.77e-07	-0.742634	0.00151714	Difenoconazole	Alkaloids	Alkaloids	C19H17Cl2N3O3	406.07	251	405.065	[M+H]+	1	119446-68-3	C18459	1.04154e+06	1.18488e+06	1.04192e+06	336489	308617	390965	291535	304357	298467	93803.4	114116	112393	610130	636760	592791	607751	573212	590933	-	C18459	-
Sasp004188	0.904112	3.75e-06	0.788483	0.00047802	Loliolide beta-D-glucopyranoside*	Terpenoids	Sesquiterpenoids	C17H26O8	359.17	197.12	358.163	[M+H]+	1	-	-	608917	742182	440286	1.32192e+06	999876	1.11996e+06	1.29585e+06	1.06746e+06	1.06427e+06	1.48126e+06	1.462e+06	1.42751e+06	868676	1.22996e+06	1.05093e+06	925581	878891	787190	-	-	-
Walbn07570	-0.924128	8.59e-07	-0.716917	0.00263097	1-(((2-(dimethylamino)ethoxy)(hydroxy)phosphoryl)oxy)-3-hydroxypropan-2-yl (9Z,12Z,15E)-octadeca-9,12,15-trienoate*	Lipids	LPE	C25H46NO7P	502.29	277.22	503.301	[M-H]-	3	-	-	41587.9	36830	28424.3	14529.2	15179.8	17830.2	17277.1	25075.9	17778.7	7585.47	6311.79	7367.82	20617	17629.1	31105.5	25705.9	30065.9	25577.1	-	-	-
Walbn07770	-0.954714	3.23e-08	-0.700846	0.00360764	3-(((2-(dimethylamino)ethoxy)(hydroxy)phosphoryl)oxy)-2-hydroxypropyl (9Z,12Z,15E)-octadeca-9,12,15-trienoate*	Lipids	LPE	C25H46NO7P	502.29	277.22	503.301	[M-H]-	3	-	-	39383.3	33641.8	34077.4	16262.2	14089.2	17189.3	16786.8	27879.9	23106.6	8641.71	7099.28	8460.13	22484.1	21297.1	30058.3	21811.2	25125.8	29272	-	-	-
Waln009920	-0.967216	4.08e-09	-0.753215	0.00118758	1-(2,3-dihydroxypropoxy)-3-(((2-(dimethylamino)ethoxy)(hydroxy)phosphoryl)oxy)propan-2-yl (8E,11Z,14Z)-octadeca-8,11,14-trienoate*	Lipids	LPE	C28H52NO9P	576.33	277.22	577.338	[M-H]-	1	-	-	129872	113569	100901	54328.3	52837.1	50218.1	59909.9	76281.9	65654.1	29161.3	21805.2	29766.6	75002.4	78328	74540.4	73964.4	75166.3	75202.8	-	-	-
Waln010192	-0.953159	4.01e-08	-0.720911	0.00242463	2-(2,3-dihydroxypropoxy)-3-(((2-(dimethylamino)ethoxy)(hydroxy)phosphoryl)oxy)propyl (8E,11Z,14Z)-octadeca-8,11,14-trienoate*	Lipids	LPE	C28H52NO9P	576.33	277.22	577.338	[M-H]-	1	-	-	130125	116717	95979.8	58985.2	50956.3	56653.9	65471.1	82205.5	67672	25899.3	23862.5	24922.4	80723.6	86762.6	79169.4	81977.6	70710.3	82020.6	-	-	-
Yyyn008289	0.933069	3.89e-07	0.828067	0.000137673	5,3'-Dihydroxy-7,4'-Dimethoxyflavone	Flavonoids	Flavones	C17H14O6	313.07	298.05	314.079	[M-H]-	2	32174-62-2	-	124687	119554	100231	172725	193750	171749	149491	175289	156068	212024	201837	221555	173944	174179	165366	180489	169494	162186	-	-	-
Zajn002491	0.92593	7.38e-07	0.697418	0.00384914	Catechin 4'-O-beta-D-glucopyranoside*	Flavonoids	Flavanols	C21H24O11	451.12	289.07	452.132	[M-H]-	2	-	-	49736.3	54488.9	58209.8	101870	141838	116455	117655	98677.1	101847	181074	158138	149841	84050.2	76054.3	100915	97084.8	104015	125442	-	-	-
Zbdn007423	-0.86485	3.16e-05	-0.91824	1.38e-06	6,7-Dimethoxy-4-chromanone	Flavonoids	Other Flavonoids	C11H12O4	207.07	192.04	208.074	[M-H]-	3	54013-49-9	-	105049	99582	77729.1	65245.9	64007	56905.8	63596.4	65172	59754.7	31911.3	26512.9	30408	58144.4	45478.6	52305	67830.7	59550.8	54629.3	-	-	-
Zbfn008708	-0.806967	0.000276756	-0.71506	0.00273152	1-O-Linoleoyl-(6-O-Hydroxyethyl-D-Glucose)	Lipids	Free fatty acids	C26H46O9	501.31	279.23	502.314	[M-H]-	2	-	-	9247.37	8018.29	14057.3	3676.45	2993.86	2674.16	6715.14	8045.35	7427.27	2757.24	3318.28	1357.34	3639.54	2832.45	4067.22	7469.44	7573.23	8528.06	-	-	-
ZBN0061	0.858626	4.17e-05	0.627175	0.0123298	Quercetin-3',4'-dimethyl ether*	Flavonoids	Flavonols	C17H14O7	329.07	314.06	330.074	[M-H]-	3	3306-29-4	-	199467	188606	177904	334504	348263	384961	223799	314285	295607	348518	322866	354215	285412	346719	280544	307973	374581	397495	-	-	-
Zbn009444	0.840317	8.79e-05	0.7665	0.000858295	Anthragallol 2-Methyl Ether; 1,3-Dihydroxy-2-methoxyanthraquinone	Quinones	Anthraquinone	C15H10O5	269.05	254.02	270.054	[M-H]-	3	10383-63-8	-	28685.4	31766.9	29383	37990.6	44914.4	50860.7	56367.5	40552	36330.9	54916.9	65709.2	56525.8	40696.2	49241.5	41293.6	45944.8	51987.4	61355	-	-	-
Zbn009590	0.963252	8.49e-09	0.815814	0.000208712	5,15-O-Dimethyl morindol	Quinones	Anthraquinone	C17H14O6	313.07	270.06	314.081	[M-H]-	2	-	-	449617	427298	415864	722179	771199	731189	738574	663168	715593	967129	880527	938242	611014	660292	717635	684224	740983	701514	-	-	-
Zbn010259	0.904046	3.76e-06	0.735465	0.00177956	1,5,7-trihydroxy-6-methoxy-2-methoxymethylanthraquinone	Quinones	Anthraquinone	C17H14O7	329.07	314.05	330.074	[M-H]-	3	-	-	273685	235988	192755	398252	358935	416333	294582	358161	345504	381127	489362	465940	351553	333466	365037	366115	382215	346630	-	-	-
ZBN0264	0.921223	1.09e-06	0.786976	0.000498637	Tricin-4'-O-syringylglyceryl ether-7-O-glucoside*	Flavonoids	Flavones	C34H38O17	717.2	329.07	718.211	[M-H]-	3	-	-	430277	435743	384517	895873	870828	813218	623301	630159	640807	1.00255e+06	978452	964614	662822	861703	873133	752655	759266	749916	-	-	-
Zbrn008158	0.917035	1.51e-06	0.680466	0.00523933	Chrysoeriol	Flavonoids	Flavones	C16H12O6	299.06	284.03	300.063	[M-H]-	3	491-71-4	C04293	2216.34	2216.34	2216.34	22817.8	25501.7	22400.1	20721.3	20893.6	31159.1	31203	27610.7	30782.3	13780.9	17271.2	11081.7	15643.1	25665.4	19585.5	ko00944	C04293	MetMap106
Zjbn102517	0.92353	9.03e-07	0.734377	0.0018224	3-hydroxy-5,3'-dimethoxybibenzyl	Others	Stilbene	C16H18O3	257.12	242.09	258.126	[M-H]-	1	-	-	94863.8	90152.2	97232.3	165835	179259	177674	132361	149517	124661	191619	172762	189397	163389	161743	136640	172208	173853	148918	-	-	-
Zjbn102547	0.873107	2.14e-05	0.707791	0.00315529	2,7-Dihydroxy-1-(p-hydroxybenzyl)-4-methoxy-9,10-dihydrophenanthrene-4'-O-glucose	Others	Others	C28H30O9	509.18	347.13	510.189	[M-H]-	3	-	-	29393.6	28044.2	23577	38958.9	38284.4	29489	33584.6	33507.7	33813.5	38346.4	40922.6	43661.3	31788.9	33831.4	33062	30818.9	26806.5	28648.6	-	-	-
Zmdn002400	0.931921	4.33e-07	0.732598	0.00189423	Epicatechin-3'-O-β-D-glucopyranoside*	Flavonoids	Flavanols	C21H24O11	451.13	289.07	452.132	[M-H]-	2	-	-	28668.6	38080.7	61115.7	132752	128828	103923	116258	117861	107515	135251	155776	158970	86023.7	85278.2	105169	75791.8	105611	125290	-	-	-
Zmzp000145	0.886193	1.09e-05	0.749415	0.00129849	N6,N6,N6-Trimethyl-L-lysine	Amino acids and derivatives	Amino acids and derivatives	C9H20N2O2	189.16	84.08	188.153	[M+H]+	1	23284-33-5	C03793	4.76085e+06	4.35185e+06	3.84695e+06	5.41526e+06	5.61844e+06	5.30572e+06	5.5268e+06	5.72291e+06	5.12759e+06	6.62972e+06	6.83035e+06	5.79094e+06	4.91932e+06	5.64996e+06	4.95823e+06	3.95688e+06	5.39175e+06	5.13615e+06	ko00310,ko01100	C03793	-

## Sheet: Magenta
Index	MM	MM.p	GS	GS.p	Compounds	Class I	Class II	Formula	Q1 (Da)	Q3 (Da)	Molecular weight (Da)	Ionization model	Level	CAS	cpd_ID	120DAI_1	120DAI_2	120DAI_3	180DAI_1	180DAI_2	180DAI_3	240DAI_1	240DAI_2	240DAI_3	300DAI_1	300DAI_2	300DAI_3	360DAI_1	360DAI_2	360DAI_3	QC01	QC02	QC03	kegg_map	mw_cpd_ID	mw_map
Labn002264	0.97703	4.14e-10	0.891273	8.21e-06	Grevilloside G	Phenolic acids	Phenolic acids	C14H20O8	315.11	153.05	316.116	[M-H]-	2	791846-69-0	-	1.68041e+06	1.76531e+06	1.50392e+06	1.59575e+06	1.51051e+06	1.64237e+06	2.4507e+06	2.42425e+06	2.28859e+06	4.55045e+06	4.41119e+06	4.6928e+06	3.54632e+06	3.60102e+06	2.78723e+06	2.6941e+06	2.73826e+06	2.86157e+06	-	-	-
Lmbn000193	-0.896297	6.11e-06	-0.926552	7e-07	2-Hydroxy-3-oxopropanoate*	Organic acids	Organic acids	C3H4O4	103	59.01	104.011	[M-H]-	3	2480-77-5	C01146	60194.3	54340.5	70440.8	45301.1	54987.5	43124.3	44159	40682.4	48224	27439.6	30255.4	24629.5	34449.3	40781.7	33506	44258.6	40940.2	32053.6	ko00053,ko00630,ko01100	C01146	-
Lmbn002737	0.832275	0.00011846	0.79864	0.000356429	3-Methylbenzaldehyde	Others	Aldehyde compounds	C8H8O	119.05	93.03	120.058	[M-H]-	3	620-23-5	C07209	34102.9	37830.2	35548.8	53712.3	46427.7	64262.1	44255.9	68186.2	52956.3	99563	87939.5	87117.5	61835.2	41827.2	71003.7	53120.4	64085.6	51161.3	ko01100	C07209	-
Lmmn000774	0.881228	1.42e-05	0.936647	2.74e-07	Dihydrocaffeoylglucose*	Phenolic acids	Phenolic acids	C15H20O9	343.1	181.05	344.111	[M-H]-	1	-	-	671579	741256	705688	809517	831415	877110	938486	889273	1.01741e+06	1.18007e+06	1.1576e+06	1.05355e+06	1.09509e+06	1.25225e+06	1.11736e+06	900474	881365	911615	-	CM02657	MetMap166,MetMap168,MetMap169
Lmmn001643	0.903509	3.9e-06	0.876484	1.81e-05	trans-2-Hydroxycinnamate*	Phenolic acids	Phenolic acids	C9H8O3	163.04	119.05	164.047	[M-H]-	1	583-17-5	C01772	398511	371603	421751	540672	477353	537055	623174	551447	586773	783814	841342	759786	558424	525725	608869	571272	537613	475547	ko00360,ko00999,ko01100,ko01110	C01772	MetMap166
Lmqn000780	-0.808199	0.000266314	-0.757489	0.0010721	UDP-N-acetyl-alpha-D-glucosamine	Nucleotides and derivatives	Nucleotides and derivatives	C17H27N3O17P2	606.08	384.98	607.082	[M-H]-	2	528-04-1	C00043	204928	204762	199835	180964	190695	215528	172267	153394	187463	104407	164299	99948.8	107695	133202	198016	162038	177346	135393	ko00520,ko01100,ko01250	C00043	-
Lmsn003297	0.9398	1.98e-07	0.867782	2.76e-05	2',3,4,4',6'-Peptahydroxychalcone 4'-O-glucoside*	Flavonoids	Chalcones	C21H22O11	449.11	287.06	450.116	[M-H]-	1	-	C16408	141141	109878	92123.9	121100	140880	84656.5	202664	174062	201505	300229	294497	281617	193836	193693	197030	160133	181532	191260	ko00941,ko01110	C16408	-
Lmtn002796	0.96425	7.12e-09	0.875908	1.87e-05	Aromadendrin-7-O-glucoside*	Flavonoids	Flavanonols	C21H22O11	449.11	287.06	450.116	[M-H]-	1	28189-90-4	-	112447	143275	122875	125682	128612	114423	190874	185765	181953	287344	259236	287746	182667	204272	200955	187568	218528	123229	-	CM00465	MetMap114
Lmzn001582	-0.944067	1.24e-07	-0.937307	2.57e-07	5'-Glucosyloxyjasmonic acid*	Organic acids	Organic acids	C18H28O9	387.17	207.1	388.173	[M-H]-	1	-	-	58194.4	69522.7	65054.8	36757.7	53841.7	39802.9	46396.7	49221	40189.7	4118.63	4118.63	4118.63	24690.7	22011.2	20593.1	47600	39003.7	47929.3	-	-	-
mws0609	-0.854388	5e-05	-0.751563	0.00123481	3',5'-Cyclic GMP	Nucleotides and derivatives	Nucleotides and derivatives	C10H12N5O7P	344.04	150.04	345.047	[M-H]-	1	7665-99-8	C00942	110341	100555	99601.9	99530.4	105655	111457	74994.5	83000.9	86439.6	68029.9	61140.8	49378.5	96001.5	94763.8	86596.2	96222	92798.6	89298.3	ko00230,ko01100,ko04075	C00942	-
mws0884	-0.921838	1.04e-06	-0.886721	1.06e-05	3',5'-Cyclic AMP	Nucleotides and derivatives	Nucleotides and derivatives	C10H12N5O6P	328.05	134.05	329.053	[M-H]-	1	60-92-4	C00575	433876	462351	357048	419309	360590	390519	297151	356804	369975	211139	199858	223830	301405	311803	269411	373534	319801	328679	ko00230,ko01100	C00575	-
mws1474	0.930141	5.1e-07	0.906277	3.25e-06	3',4',5'-O-Trimethyltricetin	Flavonoids	Flavones	C18H16O7	345.1	284.07	344.09	[M+H]+	3	18103-42-9	C19807	1.45984e+06	1.45984e+06	1.45984e+06	1.45984e+06	1.45984e+06	1.45984e+06	7.67543e+06	9.58254e+06	8.97864e+06	1.24943e+07	1.11087e+07	1.27967e+07	8.20895e+06	9.65255e+06	8.71467e+06	1.02151e+07	9.5034e+06	7.29921e+06	-	C19807	-
mws1574	0.911811	2.22e-06	0.826864	0.000143617	Geniposidic acid	Terpenoids	Monoterpenoids	C16H22O10	373.11	123.01	374.121	[M-H]-	1	27741-01-1	C11673	53584.8	49622	37654.9	48260.6	36052.6	46290	56019.8	45862.8	50182.3	133869	95447.8	122111	90732.1	103376	91542.7	79169.9	85296.8	63093.6	ko00902,ko01110	C11673	-
mws1629	0.819041	0.000187608	0.823191	0.000163074	Aucubin	Terpenoids	Sesquiterpenoids	C15H22O9	345.12	183.07	346.126	[M-H]-	2	479-98-1	C09771	33667.7	37531.4	29388.8	41803.4	57810.4	30772.7	44597.3	48615.6	42383.1	66642.8	63549.7	70661.4	75333.8	47539.5	56188.9	54792.2	51819.2	65111.8	-	C09771	-
MWS1743	-0.815086	0.000213732	-0.891407	8.15e-06	alpha-hexylcinnamaldehyde	Phenolic acids	Phenolic acids	C15H20O	217.16	129.07	216.151	[M+H]+	3	101-86-0	-	423835	389421	358380	373432	336000	322850	309009	266641	297779	284287	242655	240425	276210	248730	205610	248886	337874	252757	-	CM02624	MetMap166
MWS2413	0.803355	0.000309295	0.721883	0.00237645	N-Acetyl-beta-alanine	Amino acids and derivatives	Amino acids and derivatives	C5H9NO3	130.05	58.03	131.058	[M-H]-	3	3025-95-4	C01073	14080.9	24015.2	15936.2	18171.7	23457.5	12633.3	23977.9	17952.6	21114.5	27525.6	39541.1	32421.8	24706.4	23218.5	25558.7	19454.2	27663.2	28397.8	ko00410	C01073	-
MWSmce248	0.889438	9.11e-06	0.823869	0.000159328	trans-3-Hydroxycinnamate*	Phenolic acids	Phenolic acids	C9H8O3	163.04	119.05	164.047	[M-H]-	1	14755-02-3	C12621	416248	373335	363620	510403	437576	450241	468902	532877	520801	608222	736253	738973	483723	508123	497398	498341	488948	462083	ko00360,ko01100	C12621	MetMap166
MWSmce585	-0.911158	2.32e-06	-0.926421	7.08e-07	Methyl 3-aminopropanoate	Amino acids and derivatives	Amino acids and derivatives	C4H9NO2	104.07	59.01	103.063	[M+H]+	3	4138-35-6	-	4.04465e+06	4.11615e+06	3.16843e+06	3.262e+06	3.36125e+06	3.65631e+06	2.7813e+06	2.71858e+06	2.91543e+06	1.2354e+06	1.8083e+06	1.83139e+06	1.72653e+06	1.90173e+06	1.53113e+06	2.96441e+06	3.26887e+06	3.07573e+06	-	-	-
MWSmce675	0.937171	2.6e-07	0.965328	5.85e-09	Arbutin*	Others	Others	C12H16O7	271.08	108.02	272.09	[M-H]-	1	497-76-7	C06186	1.07456e+06	1.09352e+06	1.03022e+06	1.57471e+06	1.57194e+06	1.68413e+06	2.39984e+06	2.36088e+06	2.46876e+06	2.78864e+06	2.94445e+06	3.1645e+06	2.36891e+06	2.74256e+06	2.43361e+06	2.17995e+06	2.15152e+06	2.20514e+06	ko00010	C06186	-
MWSslk186	0.9046	3.63e-06	0.937117	2.62e-07	8-O-Acetylharpagide	Terpenoids	Monoterpenoids	C17H26O11	405.14	165.06	406.147	[M-H]-	3	6926-14-3	-	14931.9	8536.59	17830.3	28581.7	16752.7	23809.8	44237	48310.7	57541.2	82136.7	66890	79938.8	78166.1	71341.1	86362.6	56103	28599.1	70309.9	-	-	-
MWStz409	0.859727	3.97e-05	0.724332	0.00225841	3,3',4',5,6,7,8-heptamethoxyflavone	Flavonoids	Flavonols	C22H24O9	433.15	403.11	432.142	[M+H]+	3	1178-24-1	-	9562.91	15468.9	24192.5	5076	10697.5	14058	4737.46	15125	9776.11	80834.9	64063.5	73626.1	43619.1	64207.8	19670.4	36469.5	33533.7	47593.9	-	-	-
MWStz460	0.917052	1.51e-06	0.906975	3.1e-06	Ombuin	Flavonoids	Flavonols	C17H14O7	331.08	316.06	330.074	[M+H]+	3	529-40-8	-	108224	108224	108224	108224	108224	108224	555972	578694	573672	804648	775383	691507	560741	691432	541122	660975	780764	709086	-	-	-
MWStz489	0.963603	7.99e-09	0.930529	4.92e-07	Gardenin B*	Flavonoids	Flavones	C19H18O7	359.11	329.07	358.105	[M+H]+	2	2798-20-1	C15109	106191	106857	122272	285701	260287	274737	320264	325118	323848	586489	693958	639902	379207	409789	362787	335338	354477	361227	-	C15109	-
PDP001012	0.91283	2.06e-06	0.894447	6.83e-06	3'(R)-O-β-D-glucopyranosyl-3',4'-dihydroxanthyletin*	Lignans and Coumarins	Coumarins	C20H24O9	409.15	247.1	408.142	[M+H]+	3	-	-	94332.4	34973.1	89767.5	77792.8	226312	180414	331959	304543	327142	803485	376748	649107	428305	508024	463945	341418	185811	381915	-	-	-
PDP058220	0.835406	0.000105642	0.776268	0.00066698	3,6,7,4'-tetramethylquercetagetin 3'-O-beta-D-glucoside	Flavonoids	Flavonols	C25H28O13	537.16	375.1	536.153	[M+H]+	3	-	-	20640.5	38572.7	22234.2	44672.5	52833.5	32039.6	39632.2	69334.9	95186.3	86945.7	106392	115537	53701.7	72020.2	43731.2	67590.8	55609.2	58985.6	-	-	-
PDP090282	0.836362	0.000101967	0.694539	0.0040618	Pyroglutamylvaline	Amino acids and derivatives	Amino acids and derivatives	C10H16N2O4	229.12	72.08	228.111	[M+H]+	3	21282-10-0	-	64897.5	97372.4	76421.8	49994.6	49711.9	44898.1	47346.9	34459.1	53614.1	173905	235279	212077	116642	134837	150098	84265.3	74768.3	99220.1	-	-	-
PDP239672	-0.90251	4.16e-06	-0.959243	1.65e-08	D-2-Aminobutyrate	Alkaloids	Alkaloids	C4H9NO2	104.07	58.06	103.063	[M+H]+	3	2623-91-8	C02261	3.25021e+07	3.10745e+07	2.76266e+07	2.4626e+07	2.22309e+07	2.58947e+07	2.22985e+07	1.85908e+07	2.01465e+07	1.04745e+07	1.41013e+07	1.56931e+07	1.54033e+07	1.55637e+07	1.28406e+07	2.38739e+07	2.54409e+07	2.3858e+07	-	C02261	-
pmb0484	-0.915461	1.7e-06	-0.964208	7.17e-09	Choline	Alkaloids	Alkaloids	C5H14NO+	104.11	60.08	104.107	[M]+	3	62-49-7	C00114	4.99185e+07	4.80753e+07	4.43721e+07	3.8413e+07	3.45516e+07	4.21556e+07	3.30372e+07	3.15663e+07	3.15074e+07	1.57874e+07	2.14523e+07	2.45683e+07	2.54012e+07	2.30903e+07	2.04623e+07	3.55737e+07	3.64463e+07	3.16973e+07	ko00260,ko00564,ko01100,ko02010	C00114	-
pmd0142	0.88445	1.2e-05	0.807003	0.000276442	LysoPC 20:0(2n isomer)	Lipids	LPC	C28H58NO7P	552.4	184.07	551.395	[M+H]+	3	-	-	14941	30208.3	15105	27095.5	24406.2	31372	34988.6	35600.2	39214.3	58561.7	53731.5	69126	36311.4	52980.5	23625.5	54285.4	37012.5	36053.2	-	-	-
pme3033	-0.925292	7.79e-07	-0.953	4.1e-08	N,N-Dimethylglycine*	Amino acids and derivatives	Amino acids and derivatives	C4H9NO2	104.07	58.07	103.063	[M+H]+	3	1118-68-9	C01026	8.51426e+06	8.9477e+06	7.79777e+06	7.35222e+06	7.50563e+06	7.89332e+06	6.21194e+06	6.39886e+06	6.39337e+06	3.83015e+06	4.97501e+06	4.55371e+06	4.86357e+06	5.1019e+06	4.13865e+06	7.05654e+06	7.59507e+06	7.41591e+06	ko00260,ko01100	C01026	-
pme3163	-0.859364	4.04e-05	-0.775556	0.000679638	Sedoheptulose 7-phosphate	Others	Saccharides	C7H15O10P	289.03	96.97	290.04	[M-H]-	3	2646-35-7	C05382	892126	925891	1.02402e+06	800420	893599	1.00359e+06	933073	878563	870360	542336	495743	609278	927116	640101	685757	807285	827332	797054	ko00030,ko00710,ko01100,ko01110,ko01200,ko01230,ko01250	C05382	-
pmf0314	-0.922287	1e-06	-0.866355	2.95e-05	cis-Abienol	Terpenoids	Ditepenoids	C20H34O	289.25	157.16	290.261	[M-H]-	3	17990-16-8	C20481	20292.5	19975.3	21083.9	19830.1	20038.6	20916	18818.1	20413.2	17424.6	16255.9	15158.6	13581.5	15942	16287	17516.8	16499.2	14499.5	21133	ko00904,ko01110	C20481	-
pmn001553	0.976363	4.98e-10	0.888118	9.81e-06	Cimidahurinine*	Others	Alcohol compounds	C14H20O8	315.11	153.06	316.116	[M-H]-	2	142542-89-0	-	3.01014e+06	2.95389e+06	2.86851e+06	2.86391e+06	2.72357e+06	2.63341e+06	4.18054e+06	3.97916e+06	4.14206e+06	7.46637e+06	7.89332e+06	7.80621e+06	6.00313e+06	5.85689e+06	4.95115e+06	4.81793e+06	4.49896e+06	4.64807e+06	-	CM02880	MetMap172
pmp000169	0.952531	4.37e-08	0.907455	3e-06	Andrographidine D aglycone*	Flavonoids	Flavanones	C19H18O7	359.11	329.06	358.105	[M+H]+	2	-	-	81184.9	93269.4	107588	187489	225872	223386	288023	281129	250934	441432	591764	598710	320662	368930	276464	271061	291831	327147	-	-	-
Rfn07779	0.908996	2.7e-06	0.883934	1.23e-05	Tamaridone	Flavonoids	Flavones	C17H14O7	331.08	316.06	330.074	[M+H]+	2	-	-	1.57195e+06	1.50628e+06	1.35201e+06	1.9434e+06	2.12085e+06	1.64556e+06	1.66653e+06	1.93529e+06	2.04619e+06	2.9584e+06	2.50007e+06	2.64212e+06	2.12059e+06	2.45971e+06	2.14349e+06	2.81353e+06	2.65716e+06	2.2572e+06	-	-	-
Sadp001677	0.914385	1.84e-06	0.908905	2.72e-06	3-O-Methyl-a-methyldopa*	Amino acids and derivatives	Amino acids and derivatives	C10H13NO4	212.09	149.06	211.084	[M+H]+	1	-	-	320062	295326	251489	381324	364986	367060	628918	684582	624491	702809	752850	865299	567740	625884	594427	564527	523288	545803	-	-	-
Safn004633	0.859519	4.01e-05	0.768567	0.000814493	Ilicifolinoside B	Terpenoids	Sesquiterpenoids	C19H32O8	447.23	387.2	388.21	[M+CH3COOH-H]-	2	-	-	28975	47026	54338.6	37908.2	36532.2	42167.9	46655.3	40235.6	46963.7	67854.7	73385	71491.2	64814.1	62815.5	56830	57034.9	52643	52869.9	-	-	-
Saln003891	0.951566	4.97e-08	0.919402	1.26e-06	Suspensoside A	Terpenoids	Monoterpenoids	C16H26O9	361.15	155.11	362.158	[M-H]-	1	-	-	247888	204176	250160	269080	217427	265889	547383	492211	518844	1.03479e+06	786154	1.04516e+06	702084	842008	909155	469920	523444	543988	-	-	-
Saln004708	0.918018	1.4e-06	0.863487	3.36e-05	1-O-Glucopyranosylamplexine*	Terpenoids	Monoterpenoids	C16H26O9	361.15	199.1	362.158	[M-H]-	2	-	-	25903.9	45385.4	38827.9	36251	32775.5	47896.2	110979	93519.7	133284	191576	295986	190643	116829	194613	134417	120095	80129.8	141602	-	-	-
Sasn001174	0.926272	7.17e-07	0.862425	3.53e-05	Hymenoside M	Others	Others	C11H20O8	339.13	117.06	280.116	[M+CH3COOH-H]-	2	-	-	172352	197828	191804	175919	179133	182085	209269	222249	199596	256536	285059	282670	256088	276706	235078	207401	194153	227809	-	-	-
Sasn005034	0.943069	1.39e-07	0.897311	5.75e-06	Gibboside*	Terpenoids	Monoterpenoids	C16H26O9	361.15	199.1	362.158	[M-H]-	2	-	-	95786.5	53205.4	47389.2	71165.5	71168.2	58704.9	178342	139535	152809	324589	264776	245873	160913	209076	227610	136803	118552	149303	-	-	-
Sazp011041	-0.83256	0.000117242	-0.881003	1.44e-05	Phyllnirurin*	Lignans and Coumarins	Lignans	C20H22O5	343.15	163.07	342.147	[M+H]+	1	120396-53-4	-	5.46601e+06	5.60703e+06	5.25952e+06	4.58669e+06	4.58912e+06	5.65384e+06	4.24261e+06	4.7544e+06	4.70698e+06	3.73021e+06	4.06614e+06	4.28263e+06	4.11822e+06	4.17743e+06	4.16137e+06	3.89817e+06	4.6297e+06	4.09306e+06	-	-	-
Smnp003415	0.944889	1.13e-07	0.912396	2.13e-06	7-O-Methylaloesin	Flavonoids	Other Flavonoids	C20H24O9	409.15	247.09	408.142	[M+H]+	3	-	-	113371	122809	87269.2	70886	224262	211910	465736	429838	318179	628791	589518	860199	443755	551350	516734	380035	222555	446310	-	-	-
Wagp002617	0.818243	0.000192656	0.779397	0.000613623	D-Glucosyl Indole-3-Carboxylate	Alkaloids	Plumerane	C15H17NO7	324.11	162.06	323.101	[M+H]+	1	-	-	976372	1.08038e+06	880434	1.25994e+06	1.401e+06	1.39362e+06	1.2423e+06	1.22305e+06	1.22161e+06	1.74149e+06	1.95843e+06	2.09579e+06	1.01004e+06	1.9511e+06	1.58563e+06	1.30174e+06	1.40683e+06	1.2989e+06	-	-	-
Wahln02444	0.977174	3.98e-10	0.883381	1.27e-05	Hydroxytyrosol Glucoside*	Others	Alcohol compounds	C14H20O8	315.11	153.06	316.116	[M-H]-	2	76873-99-9	-	1.74295e+06	1.92644e+06	1.69461e+06	1.73472e+06	1.74589e+06	1.78457e+06	2.65452e+06	2.61125e+06	2.56664e+06	4.98874e+06	5.35447e+06	5.28297e+06	3.6742e+06	3.49223e+06	3.21116e+06	3.12023e+06	3.13869e+06	3.11577e+06	-	-	-
Walbn03092	0.928918	5.69e-07	0.830436	0.000126566	Neocarthamin*	Flavonoids	Flavanones	C21H22O11	449.11	287.06	450.116	[M-H]-	1	-	C17675	132717	131705	112051	115945	122514	116436	163629	179785	196677	322182	233151	288472	185204	195799	189446	165830	219161	158069	-	C17675	-
WapTKC017660	0.891807	7.96e-06	0.780603	0.000594014	Sarcophyton D	Terpenoids	Ditepenoids	C20H34O2	307.26	81.07	306.256	[M+H]+	3	1622158-19-3	-	2070.89	2070.89	2070.89	2070.89	2070.89	2070.89	2070.89	2070.89	2070.89	22317.6	16749	32749.9	17318.3	12604.3	10354.4	12963.4	20735.9	18236.5	-	-	-
Waptn02692	0.876439	1.82e-05	0.952868	4.17e-08	3-(3,4-dihydroxyphenyl)propanoic acid glucoside*	Phenolic acids	Phenolic acids	C15H20O9	343.1	181.05	344.111	[M-H]-	1	-	-	607580	676993	623828	794797	744665	910566	942932	929426	947598	1.05734e+06	1.10482e+06	1.11838e+06	1.0318e+06	1.14528e+06	1.16551e+06	888391	891392	864413	-	-	-
Wasn003817	0.859692	3.98e-05	0.758178	0.00105437	Glucosyl 5,8-dihydroxy-2,6-dimethylocta-2,6-dienoic acid	Terpenoids	Monoterpenoids	C16H26O9	361.15	199.1	362.158	[M-H]-	2	-	-	20760.9	16156.7	20404.5	41487.3	14541.1	22255.1	50266.3	56558.3	67634.4	75660.7	121277	141846	51892.8	57006.6	28920.2	63515.4	33749.2	38192	-	-	-
Wcdn001824	0.969621	2.5e-09	0.865007	3.14e-05	2,5-Dihydroxybenzoic acid-5-O-glucoside*	Phenolic acids	Phenolic acids	C13H16O9	315.07	153.02	316.079	[M-H]-	1	-	-	1.74802e+06	2.0158e+06	1.81721e+06	1.74854e+06	1.72458e+06	1.81512e+06	2.64125e+06	2.62231e+06	2.61307e+06	4.95448e+06	5.1183e+06	5.09509e+06	3.52634e+06	3.44213e+06	2.85057e+06	3.15894e+06	3.06274e+06	2.99192e+06	-	-	-
Yacp008636	0.907643	2.96e-06	0.773849	0.000710758	Icariside E4	Lignans and Coumarins	Lignans	C26H34O10	507.23	238.12	506.215	[M+H]+	2	126253-42-7	-	83872.3	101789	92015.7	42669.4	26836.5	21366.8	17556	21482.8	21792.5	736343	757095	797944	351499	471712	355587	208900	276442	253861	-	-	-
Ymjm000152	0.943531	1.32e-07	0.976829	4.38e-10	p-Hydroxypheny-β-D-allopyranoside*	Others	Others	C12H16O7	271.08	108.02	272.09	[M-H]-	1	-	-	1.03074e+06	1.02131e+06	959236	1.44907e+06	1.50559e+06	1.61581e+06	2.14868e+06	2.1771e+06	2.25475e+06	2.57288e+06	2.77894e+06	2.92324e+06	2.35561e+06	2.54771e+06	2.30564e+06	2.03167e+06	1.9926e+06	2.01756e+06	-	-	-
Zahp007439	-0.826493	0.000145489	-0.737752	0.00169215	3,4-Methylenedioxycinnamaldehyde	Others	Aldehyde compounds	C10H8O3	177.05	149.02	176.047	[M+H]+	1	58095-77-5	-	708471	710977	707257	725381	734157	739081	772389	723970	642148	448521	593082	574782	582532	610360	607678	421893	459489	359320	-	-	-
Zbfp001070	0.863866	3.31e-05	0.908271	2.84e-06	N-(1-Deoxy-1-fructosyl)phenylalanine	Amino acids and derivatives	Amino acids and derivatives	C18H17NO5	328.12	166.07	327.111	[M+H]+	3	-	-	474343	485190	671554	861952	837949	756553	855322	879982	1.23037e+06	1.15761e+06	1.43248e+06	1.2002e+06	1.15095e+06	1.3214e+06	1.02566e+06	1.20441e+06	978154	1.13979e+06	-	-	-
zjsp010407	-0.893397	7.26e-06	-0.927022	6.72e-07	1,7-bis(4-hydroxyphenyl)-3-heptanone	Others	Others	C19H22O3	299.16	107.05	298.157	[M+H]+	3	-	-	29445.3	26374.4	36965.4	18650.6	24905.8	11916.7	12001.5	15123	19167.7	1577.57	1577.57	1577.57	11762.4	11774	7887.87	36791.7	59537.8	40170.5	-	-	-
Zkep02152	-0.951007	5.35e-08	-0.955974	2.7e-08	Cyclic AMP*	Nucleotides and derivatives	Nucleotides and derivatives	C10H12N5O6P	330.06	136.06	329.053	[M+H]+	1	-	-	429297	449339	392211	313264	380979	377856	289621	259875	283659	168346	162511	182388	268271	260002	231182	360510	333682	299059	-	-	-
Zmjp010694	0.972318	1.38e-09	0.939486	2.05e-07	5-Hydroxy-3,7,3',4'-tetramethoxyflavone (Retusin)	Flavonoids	Flavones	C19H18O7	359.11	344.09	358.105	[M+H]+	1	1245-15-4	-	848118	781593	861926	2.06072e+06	2.08519e+06	1.92196e+06	2.63231e+06	2.31884e+06	2.2956e+06	4.56045e+06	4.61607e+06	4.98371e+06	2.79913e+06	3.0787e+06	2.79914e+06	2.67967e+06	2.83078e+06	2.70793e+06	-	-	-
Zmln000899	0.965558	5.6e-09	0.892636	7.59e-06	Syringaldehyde-4-O-glucoside	Others	Aldehyde compounds	C15H20O9	343.11	181.05	344.111	[M-H]-	2	-	-	557666	559805	553766	534843	573639	634443	731403	623830	652598	942020	991617	1.02422e+06	833035	807691	743179	775898	807820	838599	-	-	-
Zmxn110201	0.932412	4.14e-07	0.980113	1.63e-10	2,6-Dimethoxy-4-hydroxyphenol-1-O-β-D-glucopyranoside	Others	Others	C14H20O9	331.1	108.02	332.111	[M-H]-	1	-	-	455005	476735	476429	751242	744534	796320	1.06646e+06	1.06697e+06	1.10653e+06	1.30686e+06	1.33127e+06	1.37496e+06	1.14919e+06	1.32492e+06	1.14705e+06	1.01861e+06	947883	982261	-	-	-

## Sheet: Turquoise
Index	MM	MM.p	GS	GS.p	Compounds	Class I	Class II	Formula	Q1 (Da)	Q3 (Da)	Molecular weight (Da)	Ionization model	Level	CAS	cpd_ID	120DAI_1	120DAI_2	120DAI_3	180DAI_1	180DAI_2	180DAI_3	240DAI_1	240DAI_2	240DAI_3	300DAI_1	300DAI_2	300DAI_3	360DAI_1	360DAI_2	360DAI_3	QC01	QC02	QC03	kegg_map	mw_cpd_ID	mw_map
Cmsp006710	-0.865844	3.02e-05	-0.70613	0.00325911	3',4-Dihydroxy-3,5'-dimethoxybibenzyl*	Others	Stilbene	C16H18O4	275.13	137.06	274.12	[M+H]+	3	83088-28-2	-	96631	137804	121251	105872	102084	137344	95974.5	108921	107484	58667.9	97750.6	59800.4	37456.1	21620.6	27727.5	101362	114250	116675	-	CM02284	MetMap150,MetMap152
HJAP026	0.914997	1.76e-06	0.730689	0.0019738	Chrysoeriol-6-C-glucoside-4'-O-glucoside*	Flavonoids	Flavones	C28H32O16	625.18	463.13	624.169	[M+H]+	2	-	-	42122.4	121008	87449.8	130718	124257	128755	201816	240246	193143	185406	156061	217180	307582	284478	326583	155851	231965	195916	-	CM00238	MetMap106
HJAP120	0.871171	2.35e-05	0.61408	0.0148769	Rhamnetin-3-O-Rutinoside*	Flavonoids	Flavonols	C28H32O16	625.17	317.07	624.169	[M+H]+	1	-	-	9.63521e+06	8.22483e+06	1.09952e+07	8.92703e+06	1.60575e+07	1.19201e+07	1.99047e+07	2.2148e+07	2.13044e+07	1.26111e+07	1.51139e+07	1.81926e+07	2.43917e+07	2.3371e+07	2.89916e+07	1.86995e+07	1.57474e+07	2.03745e+07	-	CM00610	MetMap115,MetMap117
HJAP136	0.921048	1.1e-06	0.640579	0.0100871	Quercetin-3-O-(2''-O-rhamnosyl)rutinoside-7-O-glucoside	Flavonoids	Flavonols	C39H50O25	919.27	303.05	918.264	[M+H]+	3	-	-	660.169	660.169	660.169	3300.84	15366	20565.4	54067.1	34749.7	27624.4	22508.6	25825.7	20543.4	65766.1	63008.2	71687.7	21861.9	51368.9	36548.3	-	CM00648	MetMap115,MetMap116
HJN016	-0.924193	8.55e-07	-0.734883	0.00180239	Cannabisin D	Alkaloids	Alkaloids	C36H36N2O8	623.24	460.18	624.247	[M-H]-	2	-	C17908	1.05585e+07	1.31193e+07	1.28891e+07	9.44063e+06	9.88288e+06	1.01649e+07	5.0863e+06	6.17142e+06	5.84177e+06	7.04281e+06	8.24297e+06	7.42804e+06	1.9597e+06	2.22367e+06	2.05732e+06	8.82227e+06	8.24277e+06	9.1837e+06	-	C17908	-
HJN051	0.895813	6.29e-06	0.767701	0.000832615	Tamarixetin-3-O-rutinoside*	Flavonoids	Flavonols	C28H32O16	623.16	315.05	624.169	[M-H]-	1	-	-	2.8146e+07	3.27044e+07	2.61979e+07	3.1049e+07	2.86521e+07	3.59295e+07	5.38198e+07	6.12703e+07	5.69524e+07	5.43825e+07	4.66452e+07	5.30456e+07	6.28922e+07	7.55328e+07	6.20128e+07	5.21897e+07	4.57554e+07	4.18467e+07	-	-	-
Hmcn000773	0.932568	4.08e-07	0.757257	0.00107814	6'-O-Glucosylaucubin	Terpenoids	Sesquiterpenoids	C21H32O14	507.17	179.05	508.179	[M-H]-	2	-	-	521048	490441	466226	290005	300779	327039	1.54123e+06	1.55684e+06	1.57552e+06	1.41334e+06	1.40749e+06	1.34236e+06	1.98285e+06	2.1606e+06	2.16052e+06	1.33147e+06	1.28636e+06	1.24059e+06	-	-	-
Hmcp001489	0.902851	4.07e-06	0.67393	0.00587078	Isorhamnetin-3-O-(2''-O-glucosyl)galactoside-7-O-glucoside	Flavonoids	Flavonols	C34H42O22	803.23	317.06	802.217	[M+H]+	1	-	-	74067.4	108817	64729.7	63221.2	35927.9	24120.6	440489	406380	416163	419656	263863	317031	847179	665695	438159	229168	365739	262757	-	CM00858	MetMap109
Hmcp004055	0.972697	1.26e-09	0.69684	0.00389113	Quercetin-5,7,4'-tri-O-glucoside	Flavonoids	Flavonols	C33H40O22	789.21	303.05	788.201	[M+H]+	1	-	-	3.80232e+06	3.8711e+06	3.30069e+06	1.21577e+06	911763	1.27998e+06	1.10409e+07	1.13185e+07	1.23009e+07	1.10577e+07	1.02868e+07	9.55874e+06	1.94095e+07	2.12384e+07	1.78715e+07	1.20652e+07	1.08089e+07	1.23512e+07	-	CM00639	MetMap116
Hmdn001667	0.844905	7.35e-05	0.638518	0.0104094	Ellagic acid-4-O-glucoside	Tannins	Tannin	C20H16O13	463.05	300.99	464.059	[M-H]-	3	-	-	480244	596060	442571	153127	90221.5	166246	1.2285e+06	1.11982e+06	639037	1.23538e+06	831114	831623	1.66335e+06	1.12538e+06	1.5247e+06	872066	644454	1.203e+06	-	-	-
Hmgp002148	0.812581	0.000231774	0.72487	0.00223311	Nepetin-7-O-alloside*	Flavonoids	Flavones	C22H22O12	479.12	317.06	478.111	[M+H]+	1	-	-	8.03632e+06	5.54188e+06	6.70841e+06	6.62588e+06	1.34987e+07	1.31327e+07	2.49238e+07	2.31899e+07	1.2502e+07	1.42994e+07	1.62496e+07	2.12062e+07	2.51566e+07	2.38175e+07	2.55936e+07	1.84218e+07	1.31993e+07	1.354e+07	-	-	-
Hmjp002999	0.89149	8.11e-06	0.658178	0.00764075	Isorhamnetin-3-O-rutinoside; Narcissoside; Narcissin*	Flavonoids	Flavonols	C28H32O16	625.18	317.06	624.169	[M+H]+	1	604-80-8	-	9.33839e+06	1.04406e+07	1.11418e+07	1.1551e+07	1.77122e+07	1.70936e+07	2.30394e+07	2.43024e+07	2.04241e+07	1.46667e+07	1.76391e+07	2.05467e+07	2.94529e+07	2.80974e+07	3.08514e+07	2.09306e+07	1.65883e+07	2.35918e+07	-	-	-
Hmjp004736	0.925349	7.76e-07	0.694728	0.00404752	Epigallocatechin-3-O-(3,5-O-dimethyl)gallate	Flavonoids	Flavanols	C24H22O11	487.12	139.04	486.116	[M+H]+	3	-	-	10428	14458.1	11753.9	8719.89	10209.2	13947.8	24396.6	22155.4	10668.9	41071.5	29273.1	28575.8	54308.1	62012.7	62823.4	24946.6	25289.6	34239.1	-	-	-
Hmln000659	0.920916	1.12e-06	0.820459	0.000178907	3-O-Galloyl-Glucose*	Phenolic acids	Phenolic acids	C13H16O10	331.07	169.01	332.074	[M-H]-	2	-	-	299825	303973	289995	340958	371847	344780	809605	829737	755208	699332	718019	913331	1.01189e+06	1.11791e+06	1.05963e+06	690780	701457	651942	-	-	-
Hmln002199	0.944335	1.21e-07	0.739335	0.00163373	Quercetin-3-O-(6''-O-acetyl)galactoside	Flavonoids	Flavonols	C23H22O13	505.1	300.03	506.106	[M-H]-	3	-	-	41994.1	35740.1	15416.9	12993	7133.47	8036.56	73922.6	97502.4	77297.6	106281	112583	138369	212356	233312	161417	76258.2	97664.6	88347.6	-	CM00580	MetMap115
Hmlp003068	0.856162	4.64e-05	0.638777	0.0103685	Meratin*	Flavonoids	Flavonols	C27H30O17	627.15	303.05	626.148	[M+H]+	1	27215-04-9	-	4.54502e+06	2.15071e+06	2.73248e+06	1.16913e+06	2.34206e+06	1.06496e+06	7.30778e+06	6.32076e+06	8.07124e+06	4.04004e+06	9.4457e+06	8.02115e+06	6.55944e+06	1.47033e+07	1.21852e+07	6.18935e+06	5.00884e+06	5.6113e+06	-	-	-
Hmlp003129	-0.910242	2.48e-06	-0.751567	0.00123469	Matairesinol	Lignans and Coumarins	Lignans	C20H22O6	359.15	137.06	358.142	[M+H]+	3	580-72-3	C10682	72092.2	69193.1	57774.5	47820.8	52252.1	60691.8	22580.5	22308.3	26292.1	42143.2	34275.6	30006.5	4461.65	4461.65	4461.65	94090.6	64020.9	90617.2	ko00999,ko01100,ko01110	C10682	-
Hmlp006179	0.978703	2.54e-10	0.652769	0.00833659	3,7-dihydroxy-2,4-dimethoxyphenanthrene	Quinones	PhenAnthraquinones	C16H14O4	271.09	224.05	270.089	[M+H]+	1	-	-	12722	19774	9222.56	23874.3	18878.8	22773	80192.2	58710.3	63431	65198.7	91494.5	86724.6	222485	231625	227561	70203.7	87261	87171.1	-	CM02181	MetMap162
Hmpp002612	0.909871	2.54e-06	0.635474	0.0109002	Luteolin-7-O-gentiobioside*	Flavonoids	Flavones	C27H30O16	611.16	287.05	610.153	[M+H]+	1	-	-	2.80621e+06	2.18738e+06	2.40352e+06	1.33749e+06	787157	574638	4.18575e+06	4.83315e+06	5.40002e+06	3.90148e+06	5.07969e+06	4.48742e+06	9.49709e+06	6.41131e+06	7.15727e+06	4.06187e+06	4.94307e+06	4.74404e+06	-	-	-
Hmpp003270	0.891554	8.08e-06	0.614926	0.014701	Luteolin-4'-O-glucoside*	Flavonoids	Flavones	C21H20O11	449.11	287.05	448.101	[M+H]+	1	6920-38-3	-	1.41746e+06	865680	1.20221e+06	210845	322192	232447	3.35365e+06	3.00712e+06	2.9135e+06	2.60276e+06	2.70791e+06	2.76733e+06	2.54408e+06	6.49717e+06	5.4226e+06	3.56728e+06	3.72569e+06	3.20875e+06	-	-	-
Hmsn001911	0.893056	7.41e-06	0.636509	0.0107313	2-Beta-Glucopyranosyloxy-3-Hydroxybenzyl Alcohol	Phenolic acids	Phenolic acids	C13H18O8	301.09	139.04	302.1	[M-H]-	1	20331-85-5	-	371803	665705	545959	483926	513754	520023	603441	604532	580810	640270	681838	726068	971191	875320	971750	715040	702783	732103	-	CM02838	MetMap164
Hmtp000776	0.821863	0.000170617	0.789287	0.000467313	4,5,6-Trihydroxy-2-cyclohexen-1-ylideneacetonitrile	Alkaloids	Alkaloids	C8H9NO3	168.07	105.03	167.058	[M+H]+	3	-	-	271478	308689	259048	386184	431947	400571	796282	854251	787598	619486	665585	704046	753128	876846	897282	598543	654478	621395	-	-	-
Hmyp010491	-0.801965	0.000322632	-0.606896	0.0164368	Yakuchinone A	Others	Ketone compounds	C20H24O3	313.18	137.06	312.173	[M+H]+	3	78954-23-1	C20211	152090	119775	49434.5	143921	131695	154909	60184	76800.5	65973.1	67336.7	78350.6	52775.1	15911.3	39223	22309.5	76415.2	107610	83851.3	-	C20211	-
Hmzp003994	0.954507	3.33e-08	0.621242	0.013438	Pedaliin*	Flavonoids	Flavones	C22H22O12	479.12	317.08	478.111	[M+H]+	1	22860-72-6	-	2.78409e+06	2.37542e+06	2.36625e+06	1.76638e+06	1.33774e+06	1.02059e+06	5.24315e+06	5.86725e+06	5.88977e+06	3.6497e+06	5.08578e+06	4.26372e+06	8.47367e+06	7.7226e+06	8.69033e+06	3.01103e+06	5.54838e+06	5.57467e+06	-	-	-
HX1201	0.944406	1.2e-07	0.695528	0.0039877	Pseudopurpurin-glucoside	Quinones	Quinones	C21H18O12	463.09	273.04	462.08	[M+H]+	3	-	-	166048	132323	203825	69097.3	131871	179279	751501	733147	733342	533367	546483	558728	848022	1.11735e+06	1.1235e+06	728162	560905	649545	-	-	-
Jmwn002117	0.937136	2.61e-07	0.618482	0.0139792	2,6-dimethoxybenzene-1,4-diol 1-O-β-D-glucopyranoside	Phenolic acids	Phenolic acids	C14H20O9	331.1	153.02	332.111	[M-H]-	1	-	-	61002.8	48469.8	70268.7	60178.5	64481.4	38286.8	138089	106366	104479	83163.3	164348	218937	424534	353848	339562	179201	181235	174571	-	-	-
Jmzn002987	0.943593	1.31e-07	0.675747	0.00568956	Magnoloside E	Lignans and Coumarins	Lignans	C28H34O15	609.18	447.15	610.19	[M-H]-	2	-	-	257745	322609	303364	167164	190031	203897	960155	745220	902179	768614	609660	618468	1.09818e+06	1.27979e+06	1.17516e+06	861283	774066	679707	-	-	-
Labn008341	-0.883063	1.29e-05	-0.851588	5.62e-05	4-hydroxy-3,6,9-trimethyl-2,3-dihydrobenzo[de]chromene-7,8-dione	Others	Ketone compounds	C15H14O4	257.08	242.06	258.089	[M-H]-	2	-	-	32236.5	35990.6	37385.8	28432.9	27976.2	35128.7	17346.8	19318.1	30375.7	11916.7	14270.1	12465.4	2383.34	2383.34	2383.34	19255.1	26300.9	19540.8	-	-	-
Lacp005171	0.841542	8.38e-05	0.72676	0.00214608	3-(3'-Hydroxybutyl)-2,4,4-trimethylcyclohexa-2,5-dienone glucoside	Terpenoids	Sesquiterpenoids	C19H30O7	371.21	133.1	370.199	[M+H]+	1	-	-	391924	334441	250907	443553	294184	262888	327983	397607	368435	727482	1.24902e+06	1.13967e+06	1.75555e+06	1.46281e+06	1.52646e+06	777474	803351	858566	-	-	-
Ladp002110	0.966497	4.69e-09	0.630623	0.0117191	4-hydroxy-2-oxo-1,2-dihydroquinoline-3-carboxylic acid*	Alkaloids	Quinoline alkaloids	C10H7NO4	206.04	160.04	205.037	[M+H]+	1	73776-24-6	-	1.05905e+06	1.09064e+06	913682	1.1498e+06	1.23572e+06	1.04791e+06	1.45231e+06	1.71331e+06	1.61041e+06	1.51906e+06	1.38232e+06	1.82935e+06	2.56084e+06	3.28506e+06	2.60702e+06	1.71394e+06	1.56295e+06	1.62596e+06	-	-	-
Ladp003860	0.944438	1.19e-07	0.640738	0.0100626	Diapiosyl Isorhamnetin-3-O-rutinoside	Flavonoids	Flavonols	C38H48O24	889.26	317.07	888.254	[M+H]+	3	-	-	69730.7	36912	41039.4	48075.7	90289.3	62384.7	209163	116824	110626	140742	120808	114373	242094	280254	313756	124748	141567	195346	-	-	-
Ladp004020	0.911546	2.26e-06	0.654112	0.00815939	tenuiflorin C glucoside	Others	Chromone	C22H22O12	479.12	317.06	478.111	[M+H]+	1	-	-	8.80621e+06	3.59259e+06	7.89052e+06	7.85785e+06	1.19954e+07	1.06571e+07	2.20833e+07	2.17614e+07	1.99678e+07	1.39853e+07	1.11667e+07	2.06159e+07	2.59102e+07	3.30304e+07	2.66208e+07	1.95772e+07	1.31731e+07	1.48277e+07	-	-	-
Ladp007978	0.843157	7.87e-05	0.65013	0.00869376	5,7,8,3',4',5'-hexamethoxyflavone*	Flavonoids	Flavones	C21H22O8	403.14	373.09	402.132	[M+H]+	1	-	-	96634.2	171104	118395	139696	100117	97655	84591.8	152065	82702.8	288185	340968	278053	420451	620451	431625	238033	219474	209359	-	-	-
Lafp004228	0.916263	1.6e-06	0.738651	0.00165879	(6R,9R)-3-Oxo-α-ionol-β-D-glucoside*	Terpenoids	Sesquiterpenoids	C19H30O7	371.21	209.15	370.199	[M+H]+	1	-	-	572942	391518	522844	257133	428095	378029	1.01393e+06	1.09803e+06	1.21685e+06	3.49699e+06	3.44961e+06	3.83979e+06	5.79755e+06	6.95238e+06	6.83641e+06	2.91995e+06	2.04453e+06	2.57475e+06	-	-	-
Lahp004580	0.864167	3.26e-05	0.777749	0.000641277	rhamnazin-3-O-β-D-apiosyl-(1→2)-O-β-D-glucoside	Flavonoids	Flavonols	C28H32O16	625.18	331.08	624.169	[M+H]+	2	-	-	45405.7	35511.2	45388.9	51639	81192.7	66109.9	125970	164209	168496	151986	101896	132691	164365	205447	176259	88897.7	131831	127724	-	-	-
Lajp005875	0.94264	1.46e-07	0.81645	0.000204405	Odoratin rutinoside*	Flavonoids	Flavones	C29H34O15	623.2	315.08	622.19	[M+H]+	1	-	-	422137	432895	420386	556202	555641	488361	772071	775171	757135	804758	755267	845872	963548	1.18479e+06	1.11539e+06	798235	873866	770361	-	-	-
Lalp006362	-0.823706	0.000160222	-0.72869	0.00206001	Cochinchinenin	Phenolic acids	Phenolic acids	C31H30O7	515.21	137.06	514.199	[M+H]+	3	400603-95-4	-	270744	291304	290248	423501	398613	381676	262517	308633	292140	82827.1	100622	86651.2	13409	18426.8	11016.9	221783	179354	169046	-	-	-
Lamn004461	0.942371	1.5e-07	0.702416	0.00350113	4'-demethyl-3,9-dihydroeucomin glucosyl rhamnosyl glucoside	Flavonoids	Other Flavonoids	C34H44O19	755.23	593.18	756.248	[M-H]-	2	-	-	307077	287999	344564	206387	231411	224447	970756	806798	945735	668918	751305	842945	1.03467e+06	1.41475e+06	1.3465e+06	795300	700868	760106	-	-	-
Latp002963	0.901907	4.32e-06	0.708462	0.00311412	5-Acetonyl-6-glucosyl-7-hydroxy-2,6-methylchromone	Others	Chromone	C19H22O10	411.13	249.08	410.121	[M+H]+	3	-	-	50976	63316.7	40232	50048.8	94089.1	93459.3	147333	102113	106522	133450	119194	121323	236398	241433	155307	116770	110938	166410	-	-	-
Lcfp001119	0.883435	1.27e-05	0.790853	0.00044701	Zeatin-O-glucoside	Alkaloids	Alkaloids	C16H23N5O6	382.17	220.12	381.165	[M+H]+	1	71866-93-8	-	527056	619531	521502	644828	521539	549353	892139	824417	863588	833793	795275	1.12332e+06	1.18686e+06	1.16828e+06	1.01583e+06	766425	968832	601783	-	-	-
Lcsn000626	0.939233	2.11e-07	0.77503	0.000689109	Rubusin B	Others	Others	C12H6O7	261	181.05	262.011	[M-H]-	3	-	-	35088.2	42729.6	36885.7	36597.7	34118	43056.4	61727.5	64818.3	60850.3	70956.9	65571.3	70106.2	103933	85349.7	100184	61668.3	74049.5	68726.2	-	-	-
Lcsn002137	0.888878	9.41e-06	0.732777	0.00188692	Homovanillic acid sulfate*	Phenolic acids	Phenolic acids	C9H10O7S	261.01	181.05	262.015	[M-H]-	3	38339-06-9	-	70469.5	65119.9	56178.7	54270.3	45862.4	46161	93085.8	115140	108778	98395	110892	150730	121109	178554	171442	116565	106504	117813	-	-	-
Lhsp101910	0.931766	4.39e-07	0.634528	0.0110562	Vibsanin F	Terpenoids	Sesquiterpenoids	C20H32O2	305.25	107.08	304.24	[M+H]+	2	72526-83-1	-	249184	322453	218825	146805	154311	123580	289433	231789	318282	503233	508508	495180	860422	945998	989804	476525	619657	468699	-	-	-
Lhyn080508	0.852693	5.37e-05	0.69023	0.00439735	Dehydrovomifoliol	Terpenoids	Monoterpenoids	C13H18O3	221.12	206.09	222.126	[M-H]-	3	15764-81-5	C02533	790.444	790.444	790.444	790.444	790.444	790.444	790.444	790.444	790.444	7524.34	12009.5	11229	22630.7	15852	21910	12148.4	3952.22	9685.35	-	C02533	-
Lmbn001467	0.882418	1.34e-05	0.833161	0.000114711	5-Acetamidopentanoate	Organic acids	Organic acids	C7H13NO3	158.08	116.07	159.089	[M-H]-	3	1072-10-2	C03087	60547.8	77575	57013.8	87114.1	81249.5	86218.3	93818.7	94049.3	85998.5	110032	122692	130050	147648	159409	153795	113381	109309	110804	ko00310,ko01100	C03087	-
Lmdp002969	0.859347	4.04e-05	0.615279	0.0146281	Myricetin-3-O-galactoside*	Flavonoids	Flavonols	C21H20O13	481.1	319.06	480.09	[M+H]+	3	15648-86-9	-	1.42739e+06	1.66984e+06	1.77551e+06	1.55115e+06	864093	896624	3.27503e+06	3.48953e+06	3.26734e+06	2.281e+06	2.6743e+06	2.69245e+06	4.44389e+06	3.13444e+06	4.09745e+06	2.15468e+06	3.69585e+06	2.63617e+06	-	CM00807	MetMap109
Lmfn000604	0.861267	3.71e-05	0.833851	0.000111859	6-O-Galloyl-β-D-glucose*	Phenolic acids	Phenolic acids	C13H16O10	331.07	169.01	332.074	[M-H]-	2	13186-19-1	-	278870	240106	262815	367746	383713	336084	787573	750512	670442	680505	826918	829172	763945	1.24386e+06	912190	784895	759800	609627	-	-	-
Lmfn001062	0.854508	4.97e-05	0.768335	0.000819332	2,4,6-Tri-O-galloyl-D-glucose*	Phenolic acids	Phenolic acids	C27H24O18	635.09	169.01	636.096	[M-H]-	3	108043-99-8	-	46795.4	51366	48665.3	76823.6	61258.8	61642.9	115549	132989	131627	111404	123761	120770	152109	132972	215914	133032	108112	118080	-	-	-
Lmfn001209	0.936407	2.81e-07	0.740383	0.00159592	Gallotannin*	Phenolic acids	Phenolic acids	C27H24O18	635.09	169.01	636.096	[M-H]-	3	18483-17-5	C17458	43794.4	56586.6	48050.7	67253.9	85358.6	75605.1	103871	114027	129815	106360	113951	105395	187997	162560	196610	90982.7	95893.1	123730	-	C17458	-
Lmhn002437	0.842428	8.1e-05	0.623193	0.0130653	Terreic acid*	Others	Ketone compounds	C7H6O4	153.02	109.03	154.027	[M-H]-	3	121-40-4	-	27061	19994.8	22213.1	3998.96	3998.96	3998.96	3998.96	3998.96	3998.96	64399.3	75561	61468.3	112508	122547	136320	38151	49286.6	63539.8	-	-	-
Lmhn003074	0.942171	1.54e-07	0.760807	0.000988872	Feruloylmalic acid	Phenolic acids	Phenolic acids	C14H14O8	309.06	193.05	310.069	[M-H]-	1	-	-	7.43009e+06	6.79782e+06	6.64385e+06	8.3218e+06	8.94022e+06	8.48813e+06	9.41491e+06	9.95382e+06	8.95864e+06	1.06434e+07	1.00674e+07	1.07569e+07	1.3839e+07	1.48845e+07	1.46038e+07	1.02868e+07	9.48506e+06	1.13517e+07	-	CM02642	MetMap165
Lmhp002764	0.807958	0.000268329	0.726922	0.00213873	Cyclo(Pro-Leu)*	Amino acids and derivatives	Amino acids and derivatives	C11H18N2O2	211.13	70.07	210.137	[M+H]+	3	5654-86-4	-	2197.39	2197.39	2197.39	10986.9	30938.8	24109.1	44641.8	19632.3	20577.6	36165.4	33670.5	17205.1	51008.9	57346.7	48515.8	38335.8	15438.4	29036	-	-	-
Lmjp002461	0.979506	1.98e-10	0.648167	0.00896702	Quercetin-3-O-neohesperidoside*	Flavonoids	Flavonols	C27H30O16	611.16	303.05	610.153	[M+H]+	1	29662-79-1	-	4.70432e+06	3.45524e+06	6.11423e+06	2.04602e+06	6.24749e+06	5.40072e+06	1.31862e+07	1.64567e+07	1.67941e+07	1.50232e+07	1.0875e+07	1.51402e+07	2.73963e+07	3.83546e+07	3.00797e+07	1.70693e+07	8.8294e+06	1.90074e+07	-	CM00601	MetMap115
Lmjp003295	0.933038	3.9e-07	0.666763	0.0066307	6-Methoxykaempferol-3-O-glucoside*	Flavonoids	Flavonols	C22H22O12	479.12	317.07	478.111	[M+H]+	1	63422-27-5	-	7.28219e+06	4.9538e+06	7.97276e+06	4.78634e+06	1.42199e+07	7.31966e+06	2.04117e+07	1.88035e+07	1.4325e+07	1.73081e+07	1.04856e+07	1.81221e+07	2.53902e+07	3.10955e+07	3.01414e+07	2.05168e+07	1.46242e+07	2.00577e+07	-	CM00471	MetMap113,MetMap114
Lmmn007256	-0.862158	3.57e-05	-0.902821	4.07e-06	Hemigossypol	Terpenoids	Sesquiterpenoids	C15H16O4	259.1	231.04	260.105	[M-H]-	2	40817-07-0	C09680	1.64777e+06	1.65299e+06	1.58311e+06	1.61451e+06	1.60628e+06	1.51255e+06	1.37355e+06	1.31924e+06	1.32773e+06	1.26179e+06	1.25387e+06	1.20348e+06	1.1957e+06	1.11592e+06	1.13515e+06	1.06623e+06	1.39919e+06	1.13127e+06	-	C09680	-
Lmmp001965	0.81082	0.000245183	0.652307	0.00839826	Gossypetin-3-O-rutinoside-8-O-glucoside*	Flavonoids	Flavonols	C33H40O22	789.2	465.1	788.201	[M+H]+	1	-	-	1.97626e+06	3.01348e+06	2.91855e+06	1.63411e+06	1.27042e+06	823949	1.15025e+07	1.03411e+07	1.12035e+07	8.87436e+06	6.12736e+06	8.38889e+06	1.60077e+07	1.23147e+07	7.79099e+06	5.84689e+06	8.11068e+06	7.22651e+06	-	-	-
Lmmp002463	0.896827	5.92e-06	0.67456	0.00580743	Sexangularetin-3-O-glucoside-7-O-rhamnoside*	Flavonoids	Flavonols	C28H32O16	625.18	317.07	624.169	[M+H]+	1	-	-	1.06737e+07	8.45494e+06	1.21526e+07	1.07596e+07	1.80657e+07	1.50965e+07	2.954e+07	2.13657e+07	2.10702e+07	1.91936e+07	1.7798e+07	2.025e+07	3.01706e+07	3.07582e+07	3.36106e+07	2.13041e+07	1.55464e+07	2.41558e+07	-	-	-
Lmmp002963	0.88903	9.33e-06	0.61535	0.0146134	6-C-Methylquercetin-3-O-rutinoside*	Flavonoids	Flavonols	C28H32O16	625.18	317.06	624.169	[M+H]+	1	-	-	9.82868e+06	7.35126e+06	1.22418e+07	8.48126e+06	1.71137e+07	1.35205e+07	2.14489e+07	1.84504e+07	2.24308e+07	1.64972e+07	1.58996e+07	1.52514e+07	2.78406e+07	2.4977e+07	3.20069e+07	1.88606e+07	1.49899e+07	2.13844e+07	-	CM00609	MetMap115
Lmmp002995	0.993042	1.83e-13	0.605986	0.0166432	Quercetin-7-O-(2''-malonyl)glucosyl-5-O-glucoside	Flavonoids	Flavonols	C30H32O20	713.15	303.06	712.149	[M+H]+	1	-	-	169471	219459	169701	34872.6	81111.5	79114.6	606229	601937	491946	494466	436260	472130	1.32291e+06	1.29291e+06	1.35559e+06	569864	354298	666522	-	CM00621	MetMap116
Lmmp003091	0.978943	2.36e-10	0.614547	0.0147796	Multinoside A*	Flavonoids	Flavonols	C27H30O16	611.16	303.05	610.153	[M+H]+	1	59262-54-3	C17563	4.04015e+06	3.33686e+06	4.33745e+06	1.88136e+06	7.0613e+06	5.03643e+06	1.31135e+07	1.65145e+07	1.1957e+07	1.3061e+07	9.57173e+06	1.25726e+07	2.80961e+07	3.43541e+07	3.64571e+07	1.4481e+07	8.78464e+06	1.82573e+07	-	C17563	MetMap116
Lmmp003109	0.889002	9.34e-06	0.66557	0.00676438	3'-O-Methyl-epicatechin	Flavonoids	Flavanols	C16H16O6	305.1	139.04	304.095	[M+H]+	3	76549-34-3	-	18225.3	52703.6	36333.6	3645.06	3645.06	3645.06	32063	42509.8	53342.2	88987.5	98848.6	85599.8	119347	152481	185902	104271	87116.3	73045.6	-	-	-
Lmnp002584	0.832095	0.000119236	0.608809	0.0160098	Hispidulin-8-C-(2''-O-glucosyl)glucoside*	Flavonoids	Flavones	C28H32O16	625.18	463.13	624.169	[M+H]+	2	-	-	72697.8	96180.1	84934.8	114320	107129	54649.8	192346	136785	117441	74280	166671	205310	171578	280885	248503	87126.6	171962	211243	-	-	-
Lmpp003662	0.987843	6.79e-12	0.677338	0.0055345	Delphinidin 3-(6-p-coumaroyl)glucoside	Flavonoids	Anthocyanidins	C30H27O14+	611.14	303.05	611.139	[M]+	3	-	C16370	3.44232e+06	3.04927e+06	4.48796e+06	2.13304e+06	6.03409e+06	4.48558e+06	1.22463e+07	1.57748e+07	1.31235e+07	1.34075e+07	1.14283e+07	1.40186e+07	2.92708e+07	3.36959e+07	2.73168e+07	1.25021e+07	7.8097e+06	1.62008e+07	ko00942	C16370	MetMap119
Lmqn005782	0.847606	6.61e-05	0.814377	0.000218716	4,5,8-Trihydroxy-α-tetralone	Quinones	Quinones	C10H10O4	193.05	133.03	194.058	[M-H]-	3	-	-	425.346	425.346	425.346	6498.54	8210.8	2126.73	12443.7	10566.8	9886.81	8479.02	8650.71	12554.4	15823.4	15999.2	14764.3	8239.51	11220.3	11749.6	-	-	-
Lmrgn03360	-0.863343	3.38e-05	-0.607027	0.0164075	Cryptamygin B	Phenolic acids	Phenolic acids	C15H20O8	327.11	165.06	328.116	[M-H]-	2	24696-05-7	-	70853.9	86004.8	83523.7	73857.3	86732.2	72841.5	46890.5	68521.6	54536.6	44458.7	86123.5	56090.5	27122.5	30790.8	35486.5	74460.9	78075.6	85563.8	-	-	-
Lmsn001014	0.83282	0.000116144	0.880011	1.52e-05	1-O-Galloyl-beta-D-glucose*	Phenolic acids	Phenolic acids	C13H16O10	331.07	169.01	332.074	[M-H]-	2	58511-73-2	C01158	290486	252028	263089	430604	319944	281098	812980	736780	794229	754182	886245	952020	859918	1.1474e+06	914915	669057	746842	704301	ko00999	C01158	-
Lmsn002815	0.837338	9.83e-05	0.807617	0.000271205	Kaempferol-3-O-rutinoside*	Flavonoids	Flavonols	C27H30O15	593.15	285.04	594.159	[M-H]-	1	17650-84-9	C21833	974409	1.19218e+06	1.0314e+06	1.09611e+06	867044	1.06104e+06	2.03023e+06	2.1789e+06	1.48156e+06	1.95893e+06	2.00684e+06	2.01597e+06	2.02713e+06	2.26824e+06	2.5803e+06	2.09361e+06	1.30182e+06	1.68613e+06	ko00944,ko01110	C21833	MetMap113
Lmsn003088	0.903331	3.94e-06	0.684995	0.0048342	1,4,6-Tri-O-galloyl-β-D-glucose*	Phenolic acids	Phenolic acids	C27H24O18	635.09	169.01	636.096	[M-H]-	3	94513-58-3	-	47528.8	63997.3	61747.1	85782	87710.4	105866	145002	122330	148004	100696	119317	109568	162123	191335	203663	100224	113739	130711	-	-	-
Lmsn003588	-0.861539	3.67e-05	-0.82103	0.000175494	Pterocarpine	Flavonoids	Isoflavones	C17H14O5	297.08	282.05	298.084	[M-H]-	3	524-97-0	-	58387.7	57528.1	51620.6	35425.3	50850.9	40222.4	20897.4	19284	23540.7	22389	28149.6	28559.9	7102.17	8459.16	10448	29130.2	31903.9	37764.7	-	-	-
Lmsn006130	0.857762	4.33e-05	0.880575	1.47e-05	2,3,19-Trihydroxyurs-12-en-23,28-dioic acid-28-O-glucoside	Terpenoids	Triterpene Saponin	C36H56O12	679.37	517.32	680.377	[M-H]-	3	-	-	25578.9	16886.2	13942.1	19408.8	23786	13599.3	82347.7	56729.5	68229.7	87537.3	87036.6	100137	93031.7	111599	116155	68342.2	73506.6	55713.6	-	-	-
Lmsp003729	0.864152	3.26e-05	0.661929	0.00718559	Myricetin-3-O-rutinoside*	Flavonoids	Flavonols	C27H30O17	627.16	319.05	626.148	[M+H]+	2	-	-	342928	274994	219090	234723	217042	234486	530043	580966	588382	430110	498211	426609	716805	548191	653376	527806	358378	437134	-	-	-
Lmsp004721	0.925027	7.97e-07	0.648308	0.00894712	Tamarixetin-3-O-glucoside-7-O-rhamnoside*	Flavonoids	Flavonols	C28H32O16	625.18	317.07	624.169	[M+H]+	1	-	-	7.47928e+06	7.36159e+06	8.35454e+06	7.91511e+06	1.50127e+07	1.20651e+07	2.13323e+07	1.77582e+07	2.03784e+07	1.53846e+07	1.41446e+07	1.47193e+07	2.38121e+07	2.98834e+07	2.87702e+07	1.58574e+07	1.18543e+07	1.70867e+07	-	-	-
Lmtp003079	0.800637	0.000335796	0.717579	0.0025958	Peonidin-3-O-rutinoside	Flavonoids	Anthocyanidins	C28H33O15+	609.18	301.07	609.181	[M]+	3	-	-	29353.1	31179	9540.45	13392.4	16452.2	32172.9	86803.7	65197.6	102000	85813	85644.7	67822.8	163728	93917.5	82192.6	79995.1	65713.5	68258.3	-	-	-
Lmwp004293	0.974488	8.14e-10	0.656128	0.00789892	Quercetin-3-O-(2'''-O-p-coumaroyl)sophoroside-7-O-glucoside*	Flavonoids	Flavonols	C42H46O24	935.25	303.05	934.238	[M+H]+	2	-	-	43647.7	56821.1	47974.3	15473.2	16306.8	13098.3	82660.2	114030	100918	104367	114619	97291.1	183113	212925	222689	121273	134282	88923.6	-	CM00652	MetMap115,MetMap116
Lmxn002712	0.80381	0.000305036	0.928076	6.13e-07	6''-O-Acetylharpagide	Terpenoids	Monoterpenoids	C17H26O11	405.14	183.06	406.147	[M-H]-	2	-	-	28937.4	39307.6	52078.1	73763.4	57149.5	64070.2	156417	170991	142070	194072	181918	183689	179480	209236	205164	130077	150855	148618	-	-	-
Lsjp211201	0.896836	5.92e-06	0.666696	0.00663821	3S-3-hydroxy-β-damascon*	Terpenoids	Monoterpenoids	C13H20O2	209.15	137.1	208.146	[M+H]+	1	-	-	340263	382625	222417	288553	364609	344871	424994	477237	409044	750668	870203	840173	1.91297e+06	1.39814e+06	1.36845e+06	829719	801737	871307	-	-	-
MW0145398	0.923563	9e-07	0.683347	0.00497866	Arg-Ile-Ser	Amino acids and derivatives	Amino acids and derivatives	C15H30N6O5	375.24	301.12	374.228	[M+H]+	3	-	-	80118.1	60062.9	47914.9	71203.2	108110	123401	238116	200874	195794	857729	812556	1.09941e+06	1.96495e+06	2.37138e+06	2.02326e+06	688537	628032	924261	-	-	-
MW0145704	0.929567	5.37e-07	0.60083	0.0178496	Asn-Asp-Phe	Amino acids and derivatives	Amino acids and derivatives	C17H22N4O7	395.17	123.12	394.149	[M+H]+	3	-	-	180542	151456	123709	237033	150826	188184	219405	306904	358674	1.07222e+06	1.22707e+06	1.18103e+06	3.49422e+06	4.09384e+06	3.24994e+06	1.70242e+06	2.20697e+06	1.48049e+06	-	-	-
MW0149875	0.865473	3.07e-05	0.640001	0.0101767	Gln-Gln	Amino acids and derivatives	Amino acids and derivatives	C10H18N4O5	275.12	113.07	274.128	[M+H]+	3	54419-93-1	-	1.50881e+06	1.94917e+06	1.48048e+06	2.85296e+06	2.7369e+06	2.71011e+06	2.24224e+06	2.40684e+06	2.72328e+06	2.26194e+06	3.18436e+06	3.09595e+06	4.86385e+06	5.2174e+06	4.69002e+06	2.94029e+06	2.62826e+06	2.89343e+06	-	-	-
MW0151559	0.820227	0.000180307	0.769339	0.000798616	Ile-Pro-His	Amino acids and derivatives	Amino acids and derivatives	C17H27N5O4	366.21	158.15	365.206	[M+H]+	3	-	-	374110	307319	255070	385036	409836	563731	605161	537604	427066	726517	904981	731013	789335	1.03938e+06	1.3613e+06	915548	525583	1.18182e+06	-	-	-
MW0155948	0.894342	6.87e-06	0.684106	0.0049117	Pro-Met-Ser	Amino acids and derivatives	Amino acids and derivatives	C13H23N3O5S1	334.15	147.04	333.136	[M+H]+	3	-	-	37517.7	56546.1	35716	76046.2	83461.6	76915.6	100363	152661	90710.7	153282	140371	132605	359835	269177	211405	126346	175064	137986	-	-	-
mws0014	0.917082	1.5e-06	0.829996	0.000128573	Ferulate*	Phenolic acids	Phenolic acids	C10H10O4	193.05	134.04	194.058	[M-H]-	1	537-98-4	C01494	1.67394e+07	1.66606e+07	1.49726e+07	2.03622e+07	1.9662e+07	1.98832e+07	2.08447e+07	2.47947e+07	2.2608e+07	2.52261e+07	2.64842e+07	2.63475e+07	3.39166e+07	3.27329e+07	3.29324e+07	2.41358e+07	2.36634e+07	2.22913e+07	ko00940,ko01100,ko01110	C01494	MetMap165,MetMap166,MetMap168,MetMap170
MWS00330g	-0.890984	8.35e-06	-0.707653	0.00316381	1-Amino-1-cyclobutane-carboxylic-acid*	Amino acids and derivatives	Amino acids and derivatives	C5H9NO2	116.07	70.07	115.063	[M+H]+	1	22264-50-2	-	3.73744e+07	3.92321e+07	3.48572e+07	3.03616e+07	2.93239e+07	2.88343e+07	2.76473e+07	2.88063e+07	3.06286e+07	2.89626e+07	2.7598e+07	2.8393e+07	1.63313e+07	1.56046e+07	1.64545e+07	3.0764e+07	3.14153e+07	3.19276e+07	-	-	-
mws0043	0.830303	0.000127171	0.654975	0.00804702	Nobiletin*	Flavonoids	Flavones	C21H22O8	403.14	373.1	402.132	[M+H]+	1	478-01-3	C10112	117082	159470	170452	150120	106751	106002	80567	152826	98084.1	304167	416800	335272	560913	663835	445339	238800	248627	284819	-	C10112	-
mws0044	0.947233	8.58e-08	0.787265	0.000494636	Taxifolin	Flavonoids	Flavanonols	C15H12O7	303.05	125.02	304.058	[M-H]-	3	480-18-2	C01617	1819.38	1819.38	1819.38	1819.38	1819.38	1819.38	9194.6	17678.4	9597.66	17113	16001.4	15017	24317.7	29665.4	28644.6	15219.2	14644.4	9096.88	ko00941,ko01100,ko01110	C01617	MetMap117
mws0059	0.96736	3.97e-09	0.614053	0.0148825	Rutin*	Flavonoids	Flavonols	C27H30O16	609.15	301.04	610.153	[M-H]-	1	153-18-4	C05625	877846	1.14046e+06	1.02702e+06	430617	600103	591684	2.64628e+06	1.62426e+06	2.40053e+06	1.24179e+06	2.24552e+06	2.74385e+06	4.67966e+06	4.57942e+06	4.94024e+06	2.30736e+06	2.67888e+06	2.76249e+06	ko00944,ko01100,ko01110	C05625	MetMap115
mws0180	0.915242	1.73e-06	0.60469	0.0169404	2,5-Dihydroxybenzoate*	Phenolic acids	Phenolic acids	C7H6O4	153.02	109.03	154.027	[M-H]-	3	490-79-9	C00628	24514.3	22380.7	21004.7	2993.36	2993.36	2993.36	18399.6	14966.8	20392.1	59343.6	52280	61217.4	109799	151402	117865	50689.9	48849.1	46981.1	ko00350,ko01100	C00628	MetMap158,MetMap159
MWS0205	-0.803219	0.000310587	-0.828955	0.000133422	Allantoin	Alkaloids	Alkaloids	C4H6N4O3	157.04	97	158.044	[M-H]-	3	97-59-6	C01551	246309	214414	229726	253571	228463	232794	183986	204991	190610	169764	143985	142777	176121	117131	131361	192138	211580	197741	-	C01551	-
mws0282	0.960452	1.36e-08	0.631509	0.0115661	Tryptophan	Amino acids and derivatives	Amino acids and derivatives	C11H12N2O2	203.08	116.05	204.09	[M-H]-	1	1954-12-06	C00806	1.27585e+06	1.15177e+06	1.07703e+06	1.6424e+06	1.76213e+06	1.80611e+06	2.25189e+06	2.15672e+06	2.11352e+06	2.08618e+06	2.25367e+06	2.14555e+06	4.72031e+06	4.72312e+06	4.33246e+06	2.18773e+06	2.67943e+06	2.43346e+06	-	C00806	-
mws0458	-0.814263	0.000219524	-0.731068	0.00195781	4-Hydroxy-3-methoxy-benzaldehyde	Others	Aldehyde compounds	C8H8O3	151.04	136.02	152.047	[M-H]-	3	121-33-5	C00755	264392	226027	228832	269591	254076	273558	175221	217740	234215	196989	147714	167253	179743	131571	120782	116914	191793	141356	ko01100,ko01110	C00755	-
mws0668	0.908026	2.89e-06	0.740474	0.00159267	Xanthosine	Nucleotides and derivatives	Nucleotides and derivatives	C10H12N4O6	283.07	151.03	284.076	[M-H]-	3	146-80-5	C01762	51903.9	53900.4	45978.9	40333.3	45928.3	41241.8	49781.3	64100.5	66292.4	76692.4	78828.6	83716.9	94783	101615	112509	59839	68608.6	72638.8	ko00230,ko00232,ko01100,ko01110,ko01232,ko02010	C01762	-
mws0913	0.984473	3.31e-11	0.654414	0.00811999	Kaempferol-3-O-galactoside*	Flavonoids	Flavonols	C21H20O11	447.09	285.04	448.101	[M-H]-	3	23627-87-4	C12626	132756	242404	241263	64397.4	62890.1	117038	442920	507050	466410	439601	463416	435006	926400	950152	887390	505774	524728	501488	ko00944,ko01110	C12626	MetMap113
MWS0933	0.81392	0.000221983	0.849406	6.14e-05	N(pi)-Methyl-L-histidine	Amino acids and derivatives	Amino acids and derivatives	C7H11N3O2	170.09	124.09	169.085	[M+H]+	3	332-80-9	C01152	1.63179e+06	1.36449e+06	1.47311e+06	1.94168e+06	1.89162e+06	2.00629e+06	4.00693e+06	4.21039e+06	4.20988e+06	3.64992e+06	3.7842e+06	3.89937e+06	4.56001e+06	4.27115e+06	4.29673e+06	3.18039e+06	3.94189e+06	3.13536e+06	ko00340,ko01100	C01152	-
mws0983	0.880829	1.45e-05	0.604233	0.0170462	Oleoylethanolamide	Alkaloids	Alkaloids	C20H39NO2	326.31	62.06	325.298	[M+H]+	1	111-58-0	C20792	205192	217964	168972	177652	175285	162384	150669	153874	169800	320356	350943	521611	690528	855543	732277	378777	305205	389268	-	C20792	-
mws1013	0.969255	2.7e-09	0.611121	0.015505	Esculetin	Lignans and Coumarins	Coumarins	C9H6O4	177.02	133.03	178.027	[M-H]-	3	305-01-1	C09263	404891	306875	346695	250311	179438	217201	718055	699096	654142	534906	672252	804153	1.35435e+06	1.37922e+06	1.76327e+06	742306	675852	820813	ko00999,ko01110	C09263	MetMap133
mws1105	0.922148	1.01e-06	0.696682	0.00390262	Gramine	Alkaloids	Plumerane	C11H14N2	175.12	130.07	174.116	[M+H]+	3	87-52-5	C08304	50524.8	50524.8	50524.8	252624	460294	454615	508137	520367	474486	425504	544354	468978	1.01643e+06	1.27248e+06	1.10202e+06	573186	401998	622680	ko00999,ko01110	C08304	-
mws1172	0.954231	3.46e-08	0.781256	0.000583607	Trifolirhizin	Flavonoids	Isoflavones	C22H22O10	445.11	283.06	446.121	[M-H]-	3	6807-83-6	C10538	13866.5	10573	2114.6	16979.5	18808.9	13243.9	64838.6	78093.7	75795.8	57908	67933.9	81881.8	120393	138925	108518	85129	47725.5	34809.4	-	C10538	-
mws1375	-0.964501	6.8e-09	-0.750154	0.00127629	Nicotianamine	Alkaloids	Alkaloids	C12H21N3O6	304.15	185.09	303.143	[M+H]+	1	34441-14-0	C05324	2.88406e+07	2.92931e+07	2.63177e+07	2.57151e+07	2.76544e+07	2.60519e+07	1.65971e+07	1.52141e+07	1.44972e+07	1.71654e+07	1.88222e+07	1.70572e+07	5.4435e+06	5.42942e+06	5.54284e+06	2.05509e+07	2.03094e+07	2.0198e+07	ko00270,ko00999,ko01100,ko01110	C05324	-
MWS201483	0.869368	2.56e-05	0.85571	4.73e-05	Phe-Hyp	Amino acids and derivatives	Amino acids and derivatives	C14H18N2O4	279.13	120.08	278.127	[M+H]+	3	90965-82-5	-	40754.6	25900.7	25564.8	38801.9	54582.1	38102.9	81225.9	99329.3	83448.9	89115.8	86838.5	85956.7	109597	117309	100842	90851.9	79450.5	74754.5	-	-	-
MWS20182	0.840256	8.81e-05	0.742268	0.00152972	Dihydroferulic Acid	Phenolic acids	Phenolic acids	C10H12O4	195.07	136.05	196.074	[M-H]-	3	1135-23-5	-	50683.8	44679.5	53776.7	63645.2	58763.6	64253.2	69416.3	60752.8	63575.4	59582.2	83414.9	84336.1	106538	100043	87009.6	63592.4	74020.8	68984	-	CM02618	MetMap165,MetMap166,MetMap168,MetMap170
MWSHC20168	0.857938	4.3e-05	0.611127	0.0155036	Methyl cumalate*	Others	Lactones	C7H6O4	153.02	109.03	154.027	[M-H]-	3	6018-41-3	-	19555.8	29082.6	17645.7	3529.14	3529.14	3529.14	3529.14	3529.14	3529.14	70956.4	69865.6	61119.1	145624	146054	117638	48962.5	54769.4	36650.6	-	-	-
MWSHY0104	0.9822	7.99e-11	0.606655	0.0164912	Luteolin 7-O-beta-D-glucoside*	Flavonoids	Flavones	C21H20O11	449.11	287.06	448.101	[M+H]+	1	5373-11-05	C03951	2.17017e+06	2.29962e+06	1.67337e+06	373349	462953	409336	4.14038e+06	4.27701e+06	4.09063e+06	3.17857e+06	3.65447e+06	4.12824e+06	7.52648e+06	8.14691e+06	7.85738e+06	4.19903e+06	6.75969e+06	4.39699e+06	ko00944	C03951	-
MWSmce039	0.941118	1.72e-07	0.79884	0.000354311	Isonicotinic acid	Others	Vitamin	C6H5NO2	124.04	80.05	123.032	[M+H]+	2	55-22-1	C07446	3.11356e+06	3.69598e+06	2.89144e+06	5.18933e+06	4.75631e+06	4.62515e+06	6.45994e+06	5.93364e+06	6.76186e+06	6.50063e+06	6.98893e+06	7.00988e+06	9.779e+06	1.09966e+07	9.6111e+06	6.04215e+06	5.60681e+06	5.76761e+06	-	C07446	-
MWSmce161	-0.834188	0.000110485	-0.728148	0.00208388	Gigantol(3,3'-Dihydroxy-5,4'-dimethoxybibenzyl)*	Others	Stilbene	C16H18O4	275.12	137.06	274.12	[M+H]+	3	67884-30-4	-	119022	116330	109608	109728	134921	106911	113897	116663	118117	59132.6	72971.5	69978.6	35517.3	32100.7	35253.4	95425.6	92433	98193.9	-	CM02281	MetMap150,MetMap152
MWSmce208	0.841691	8.33e-05	0.627387	0.0122914	beta-Carboline	Alkaloids	Plumerane	C11H8N2	169.07	115.05	168.069	[M+H]+	3	244-63-3	C20157	75285.2	44653.7	35916.3	51812.7	33199.8	19634.3	74447.7	12061.3	41302.3	105747	90421.6	149757	182176	183739	224119	95383.1	84347.5	83725.5	-	C20157	-
MWSmce578	-0.833076	0.000115068	-0.708778	0.00309486	Aegeline	Alkaloids	Phenolamine	C18H19NO3	298.14	131.05	297.137	[M+H]+	1	456-12-2	-	419018	575425	448388	279781	528701	465017	78084.9	104921	73240.2	157798	250159	271534	23465.3	13904.4	24587.1	251189	238322	276509	-	-	-
MWSmce709	0.966661	4.55e-09	0.633274	0.0112658	Isoquinoline	Alkaloids	Isoquinoline alkaloids	C9H7N	130.06	103.05	129.058	[M+H]+	2	119-65-3	C06323	311399	346020	278997	518866	391665	332802	660511	670540	680667	650226	514451	705055	1.44383e+06	1.45863e+06	1.17689e+06	542967	601986	555720	-	C06323	-
MWSN0090	0.851173	5.71e-05	0.789342	0.000466579	Scolymoside*	Flavonoids	Flavones	C27H30O15	593.15	285.04	594.159	[M-H]-	1	25694-72-8	C12630	1.02394e+06	830493	1.06014e+06	1.00187e+06	938076	1.27768e+06	2.18862e+06	1.44133e+06	1.16931e+06	1.76151e+06	1.97656e+06	1.992e+06	2.03005e+06	2.64674e+06	2.42971e+06	1.95262e+06	1.04283e+06	1.73982e+06	ko00944	C12630	-
MWSN0164	0.850558	5.86e-05	0.779988	0.000603948	Kaempferol-3-O-glucorhamnoside	Flavonoids	Flavonols	C27H30O15	593.15	284.03	594.159	[M-H]-	2	40437-72-7	-	222229	140045	142687	183840	173564	200114	242057	222592	278481	275790	327689	224720	353820	342802	320898	295852	324169	359487	-	-	-
MWSslk136	0.948341	7.49e-08	0.806226	0.000283191	Pectolinarin*	Flavonoids	Flavones	C29H34O15	623.2	315.1	622.19	[M+H]+	1	28978-02-1	-	539174	425690	442704	559553	530551	509543	731156	868286	775262	841944	852251	824718	1.02808e+06	1.2029e+06	1.1571e+06	871490	885134	753642	-	-	-
MWSslk141	0.917108	1.5e-06	0.65704	0.00778325	Hesperidin methylchalcone	Flavonoids	Chalcones	C29H36O15	625.22	317.1	624.205	[M+H]+	2	24292-52-2	-	134021	126906	100874	156511	119532	217505	212484	249442	208277	241779	183731	194026	371025	388711	302410	240984	206625	228543	-	-	-
MWStz038	-0.893002	7.43e-06	-0.749314	0.00130156	Grossamide*	Alkaloids	Phenolamine	C36H36N2O8	625.26	325.11	624.247	[M+H]+	1	80510-06-1	-	504100	551346	535740	354524	390274	366295	222493	259453	291511	281611	367948	300779	81899.3	93367.7	73837.2	357543	344572	394569	-	-	-
MWStz079	0.854951	4.88e-05	0.721508	0.00239493	Aurantiamide acetate	Alkaloids	Alkaloids	C27H28N2O4	445.21	224.11	444.205	[M+H]+	1	56121-42-7	-	17120.7	20633	26614.8	28893.5	18335.7	19349.1	24652.6	26033.7	14329.7	62608.7	94188	83109.2	116966	134125	131687	72198.4	82599.5	55947.9	-	-	-
MWStz457	0.938557	2.26e-07	0.644087	0.00955642	Kaempferol-3-O-rutinoside-7-O-glucoside*	Flavonoids	Flavonols	C33H40O20	755.2	593.16	756.211	[M-H]-	1	34336-18-0	-	409045	434701	305865	257416	209863	181785	953882	757323	1.16942e+06	694040	776049	764076	1.45639e+06	1.28994e+06	1.35751e+06	704811	813021	743932	-	-	-
MWStz521	0.971835	1.54e-09	0.61094	0.015544	Quercetin 3-O-(6-O-malonyl-beta-D-glucoside)	Flavonoids	Flavonols	C24H22O15	549.09	300.03	550.096	[M-H]-	3	96862-01-0	C12638	11010.7	3387.83	12289.2	677.566	677.566	677.566	13633.5	21555.3	28499	26920.4	26227.3	26578.8	66658.7	83874.4	62882.8	32111.1	19795.8	24060	ko00944	C12638	-
MWStz530	0.966333	4.84e-09	0.623306	0.013044	Quercetin-3-O-(6''-O-acetyl)glucoside	Flavonoids	Flavonols	C23H22O13	505.1	300.03	506.106	[M-H]-	3	54542-51-7	-	31710.2	35504.3	25708.1	6755.79	5515.83	16426	61727	86720.7	76437.6	101076	96632.4	93890.7	182119	284433	269478	123363	87693.8	93919.1	-	-	-
MWStz538	0.842103	8.2e-05	0.648939	0.00885867	3',4',5,5',6,7-Hexamethoxyflavone*	Flavonoids	Flavones	C21H22O8	403.14	373.09	402.132	[M+H]+	1	29043-07-0	-	84420.8	117878	118569	118634	97424.1	59315.1	66237.6	129480	53970.6	293829	308971	222492	438460	572067	379594	192042	201649	206529	-	-	-
MWStz541	-0.92129	1.08e-06	-0.713127	0.00283949	Cannabisin F	Alkaloids	Phenolamine	C36H36N2O8	625.26	488.17	624.247	[M+H]+	2	163136-19-4	C17910	4.91277e+06	6.27072e+06	4.90155e+06	4.4499e+06	5.06772e+06	4.94614e+06	2.27453e+06	3.05189e+06	2.61781e+06	3.07891e+06	3.93213e+06	3.42611e+06	1.12377e+06	1.29052e+06	1.00964e+06	3.42492e+06	4.25169e+06	3.74516e+06	-	C17910	-
MWStz550	-0.902449	4.17e-06	-0.785449	0.000520267	Lyciumamide B	Alkaloids	Phenolamine	C36H36N2O8	625.26	462.19	624.247	[M+H]+	2	1647111-41-8	-	1.85208e+07	1.99113e+07	1.86734e+07	1.36557e+07	1.48249e+07	1.35088e+07	8.25013e+06	9.38401e+06	9.16901e+06	9.89516e+06	1.24304e+07	1.0074e+07	3.21683e+06	3.55027e+06	3.06819e+06	1.2077e+07	1.29592e+07	1.32283e+07	-	-	-
PD0059535	0.889814	8.92e-06	0.852968	5.31e-05	isorhamnetin 3-O-(3'-O-p-coumaroyl)-glucoside	Flavonoids	Flavonols	C31H28O14	625.16	317.07	624.148	[M+H]+	2	-	-	147836	96006.1	84902.5	141710	135739	135728	188766	212110	198215	221511	258777	224545	276342	331336	266420	139581	207415	197272	-	-	-
PD0181009	0.842837	7.97e-05	0.682937	0.00501507	Herbacetin-3-sophoroside-8-glucoside	Flavonoids	Flavonols	C33H40O22	789.21	303.05	788.201	[M+H]+	1	-	-	1.02273e+06	1.41216e+06	1.33949e+06	867312	614262	387059	5.34287e+06	4.58083e+06	5.02951e+06	4.0318e+06	3.06523e+06	4.30593e+06	7.52431e+06	5.90669e+06	4.1119e+06	2.96827e+06	2.81729e+06	3.63452e+06	-	-	-
PD0576542	0.927442	6.48e-07	0.744761	0.00144559	Crocusatin C	Terpenoids	Monoterpenoids	C10H16O2	169.12	81.07	168.115	[M+H]+	1	484033-27-4	-	691972	552382	543280	747811	1.18896e+06	994687	1.18713e+06	1.38811e+06	1.25811e+06	1.19005e+06	1.29097e+06	1.27721e+06	2.13969e+06	2.06246e+06	1.89744e+06	1.09726e+06	949702	1.20808e+06	-	-	-
PD0596599	0.935856	2.97e-07	0.665745	0.00674468	1,7-dihydroxyisoquinoline-5-carboxylic acid	Alkaloids	Alkaloids	C10H7NO4	206.05	132.04	205.037	[M+H]+	1	-	-	116767	115141	92304.3	101585	103014	127034	151586	157707	144753	183485	140785	193071	218638	321968	264534	161011	135266	108281	-	-	-
PD0607214	0.890635	8.52e-06	0.623772	0.0129563	Heliannone C	Flavonoids	Flavanones	C16H14O5	287.09	147.04	286.084	[M+H]+	3	193411-12-0	-	38948.7	49806.4	28645.4	26392.5	24976.4	26094.5	36934	51381.4	32970.8	57552.9	96608.1	80262.1	166953	141931	122527	76172.4	61862.8	53563.5	-	-	-
PD0863415	0.946704	9.14e-08	0.698763	0.00375289	Quercetin-3-O-(4''-Glucosyl-6'''-p-coumaroyl)rhamnoside*	Flavonoids	Flavonols	C36H36O18	757.2	303.05	756.19	[M+H]+	2	-	-	29907.4	25828.9	17175	2160.94	7379.63	7398.81	43235.6	62841.3	58241.7	85681.6	43930.1	78912.4	122194	137331	109679	73823	73551.5	86477	-	-	-
PD0894902	0.910948	2.36e-06	0.775449	0.000681543	Demethoxycentaureidin 7-O-rutinoside*	Flavonoids	Flavones	C29H34O16	639.19	331.08	638.185	[M+H]+	1	-	-	46691.6	46691.6	46691.6	249201	287245	233458	592649	596793	554540	437161	514601	510869	1.00188e+06	972609	693189	389394	446995	625959	-	-	-
PDP001555	0.982479	7.21e-11	0.614031	0.0148871	quercetin 3-O-(2''-O-malonyl)glucoside*	Flavonoids	Flavonols	C24H22O15	551.11	303.05	550.096	[M+H]+	3	-	-	100158	127255	126867	25434.7	59049.3	32782.7	249712	243496	232783	282310	300431	228468	570398	738709	687923	375688	251533	273650	-	-	-
PDP002433	0.918658	1.33e-06	0.70349	0.00342972	Luteolin 3'-methyl ether 7,4'-diglucoside*	Flavonoids	Flavones	C28H32O16	625.18	317.07	624.169	[M+H]+	1	36451-45-3	-	7.19357e+06	5.2702e+06	7.36032e+06	5.92709e+06	1.17131e+07	7.50183e+06	1.4853e+07	1.44365e+07	1.62611e+07	1.35282e+07	1.13231e+07	1.2315e+07	1.98707e+07	1.95266e+07	1.98689e+07	1.28076e+07	9.73154e+06	1.58668e+07	-	-	-
PDP002608	0.853547	5.18e-05	0.666793	0.00662738	6-Methoxykaempferol 3-rhamnoside	Flavonoids	Flavonols	C22H22O11	463.12	317.07	462.116	[M+H]+	1	-	-	898402	608803	1.02932e+06	765652	2.00967e+06	1.231e+06	2.5724e+06	1.96074e+06	2.37981e+06	1.57801e+06	1.66493e+06	2.15575e+06	2.8943e+06	2.68103e+06	3.4806e+06	1.60224e+06	1.30732e+06	1.87239e+06	-	-	-
PDP002766	0.977029	4.14e-10	0.642106	0.00985329	Laricitrin 3-rutinoside-7-glucoside	Flavonoids	Flavonols	C34H42O22	803.22	495.11	802.217	[M+H]+	2	-	-	54437.7	14407.9	43547	33481.6	44156.3	38424.2	133626	154855	215627	188527	178953	261649	610835	611476	582013	231306	147053	181498	-	-	-
PDP002933	0.960338	1.38e-08	0.648862	0.00886948	Orientin 4'-glucoside*	Flavonoids	Flavones	C27H30O16	611.16	449.11	610.153	[M+H]+	1	-	-	910690	722129	816437	365740	262509	241921	1.91616e+06	1.92681e+06	1.59182e+06	1.71395e+06	1.51066e+06	1.7527e+06	3.66832e+06	2.90748e+06	3.09805e+06	1.86232e+06	1.88296e+06	1.73579e+06	-	-	-
PDP007328	0.853482	5.19e-05	0.659991	0.007418	Lycoposerramine U	Alkaloids	Alkaloids	C17H25NO3	292.18	228.16	291.183	[M+H]+	3	481048-31-1	-	162657	163093	153805	154861	164650	128449	159764	174453	169873	193293	178691	235155	273639	235369	239045	210260	198591	187551	-	-	-
PDP033452	0.954842	3.18e-08	0.690144	0.00440426	Isorhamnetin-7-O-sophoroside*	Flavonoids	Flavones	C28H32O17	641.17	317.07	640.164	[M+H]+	3	-	-	311287	433104	290156	259725	230188	342465	1.05896e+06	951348	882945	799190	834767	890905	1.24787e+06	1.54634e+06	1.83929e+06	837223	600973	929594	-	-	-
PDP053753	0.964388	6.94e-09	0.761068	0.000982567	5-hydroxy-7-methoxy-2-(4-methoxyphenyl)-3-{[(2s,3r,4s,5s,6r)-3,4,5-trihydroxy-6-({[(2s,3r,4r,5r,6s)-3,4,5-trihydroxy-6-methyloxan-2-yl]oxy}methyl)oxan-2-yl]oxy}chromen-4-one*	Flavonoids	Flavonols	C29H34O15	623.2	315.09	622.19	[M+H]+	1	-	-	445400	409941	325341	405276	419053	359007	613662	588629	668162	637126	646743	646997	816977	965081	888990	563792	690953	668750	-	-	-
PDP055652	0.87883	1.61e-05	0.827289	0.000141495	(6-{[2-(3,4-dimethoxyphenyl)-5,7-dihydroxy-4-oxo-4H-chromen-3-yl]oxy}-3,4,5-trihydroxyoxan-2-yl)methyl (2E)-3-(4-hydroxyphenyl)prop-2-enoate;[(2r,3s,4s,5r,6s)-6-{[2-(3,4-dimethoxyphenyl)-5,7-dihydroxy-4-oxochromen-3-yl]oxy}-3,4,5-trihydroxyoxan-2-yl]methyl (2e)-3-(4-hydroxyphenyl)prop-2-enoate	Flavonoids	Flavonols	C32H30O14	639.17	331.08	638.164	[M+H]+	2	-	-	2.52655e+06	2.45001e+06	2.23757e+06	4.33663e+06	4.34397e+06	3.64533e+06	9.61676e+06	9.88502e+06	8.72509e+06	8.0094e+06	8.17727e+06	8.42136e+06	1.13866e+07	1.20097e+07	1.02949e+07	8.31642e+06	7.12573e+06	7.07503e+06	-	-	-
PDP057881	0.871552	2.31e-05	0.667545	0.00654429	6,14-dihydroxy-7-methoxy-13-{[(2s,3r,4s,5s,6r)-3,4,5-trihydroxy-6-(hydroxymethyl)oxan-2-yl]oxy}-2,9-dioxatetracyclo[6.6.2.04,16.011,15]hexadeca-1(15),4,6,8(16),11,13-hexaene-3,10-dione	Tannins	Tannin	C21H18O13	479.08	317.03	478.075	[M+H]+	2	-	-	5.28559e+06	4.50827e+06	6.59604e+06	7.40161e+06	1.2576e+07	9.63658e+06	1.8936e+07	2.18734e+07	1.60922e+07	1.10582e+07	1.05697e+07	1.91205e+07	2.66146e+07	2.36759e+07	2.34464e+07	2.07624e+07	8.90402e+06	1.71867e+07	-	-	-
PDP112451	0.89371	7.13e-06	0.738439	0.00166661	8-Methoxyluteolin-8-glucoside*	Flavonoids	Flavones	C22H22O12	479.12	317.07	478.111	[M+H]+	1	-	-	8.79978e+06	4.60679e+06	5.19109e+06	6.38881e+06	1.15175e+07	8.18703e+06	2.16802e+07	1.51483e+07	1.42888e+07	1.38535e+07	1.34039e+07	1.91114e+07	2.4538e+07	2.61348e+07	2.06165e+07	1.99652e+07	1.12682e+07	9.07597e+06	-	-	-
PDP143007	0.922974	9.45e-07	0.634438	0.0110711	2-(methylamino)-2-(1-methylpyrazol-4-yl)acetic acid*	Alkaloids	Alkaloids	C7H11N3O2	170.09	124.09	169.085	[M+H]+	3	1218519-32-4	-	978306	1.31477e+06	806208	2.16916e+06	2.04846e+06	1.9655e+06	2.13062e+06	2.37109e+06	2.73999e+06	2.50336e+06	2.07034e+06	2.8079e+06	4.7214e+06	6.50374e+06	4.70048e+06	2.48188e+06	2.49e+06	2.51575e+06	-	-	-
PDP146451	0.91588	1.65e-06	0.851645	5.6e-05	(3,4,5-trihydroxy-6-{[5-hydroxy-2-(4-hydroxy-3-methoxyphenyl)-6-methoxy-4-oxo-4H-chromen-7-yl]oxy}oxan-2-yl)methyl (2E)-3-(4-hydroxyphenyl)prop-2-enoate	Flavonoids	Flavones	C32H30O14	639.17	331.08	638.164	[M+H]+	2	-	-	2.97741e+06	2.833e+06	2.52178e+06	5.18406e+06	5.02919e+06	4.75698e+06	1.04002e+07	1.04103e+07	9.90004e+06	9.25926e+06	1.02044e+07	1.03554e+07	1.34478e+07	1.46471e+07	1.40546e+07	8.99332e+06	8.25663e+06	8.89094e+06	-	-	-
PDP150849	0.979542	1.96e-10	0.63942	0.0102675	8-methoxykaempferol 3-O-(6''-malonyl-β-glucopyranoside)*	Flavonoids	Flavonols	C25H24O15	565.12	317.07	564.111	[M+H]+	1	-	-	561318	576632	473120	265442	250820	272999	941232	1.07819e+06	1.04259e+06	912830	907225	923925	1.73906e+06	1.73566e+06	1.60398e+06	969362	1.02633e+06	916694	-	-	-
PDP151686	0.979226	2.17e-10	0.654294	0.00813555	Kaempferol 3-gentiobioside-7-glucoside*	Flavonoids	Flavonols	C33H40O21	773.21	449.11	772.206	[M+H]+	3	84543-10-2	-	31036.6	31036.6	31036.6	31036.6	31036.6	31036.6	216970	265936	265962	178138	222409	155183	406454	531942	560341	388482	203914	297384	-	-	-
PDP151752	0.96441	6.92e-09	0.616287	0.0144214	Isorhamnetin 5-glucoside*	Flavonoids	Flavonols	C22H22O12	479.12	317.07	478.111	[M+H]+	1	34199-20-7	-	1.85986e+07	2.40744e+07	2.85304e+07	1.51871e+07	3.1218e+07	3.79328e+07	5.4829e+07	6.58816e+07	6.02748e+07	4.07847e+07	4.06911e+07	5.22836e+07	9.35692e+07	9.80993e+07	1.02366e+08	5.73902e+07	4.83976e+07	6.29173e+07	-	-	-
PDP151762	0.950951	5.38e-08	0.650874	0.00859184	Isorhamnetin 3-gentiotrioside	Flavonoids	Flavonols	C34H42O22	803.23	317.07	802.217	[M+H]+	1	-	-	177595	131035	152118	124042	178057	126546	562722	628059	625984	564538	619926	599720	863385	1.77059e+06	1.41488e+06	468844	574494	350802	-	-	-
PDP151767	0.950846	5.46e-08	0.655098	0.00803111	Thesioideoside*	Flavonoids	Flavonols	C28H32O17	641.17	317.06	640.164	[M+H]+	3	145937-28-6	-	264505	347618	231149	260906	149279	283060	1.11348e+06	1.06542e+06	981753	744672	766344	851056	1.18265e+06	1.85642e+06	1.8778e+06	797598	693012	879132	-	-	-
PDP151777	-0.876419	1.82e-05	-0.654969	0.00804779	6,8-Dihydroxykaempferol 3-rutinoside	Flavonoids	Flavonols	C27H30O17	627.16	319.05	626.148	[M+H]+	3	-	-	42969.8	68905.5	48535.2	70032.7	77349.7	58620.2	52863.1	54659.5	47423.9	29817.9	33836.4	28927.5	5785.5	5785.5	5785.5	31357.3	65593.6	56760.2	-	-	-
PDP155339	0.844843	7.37e-05	0.725738	0.00219278	Epimedoicarisoside A	Others	Others	C24H30O10	479.19	317.14	478.184	[M+H]+	3	165198-96-9	-	7.63304e+06	4.71984e+06	6.76901e+06	7.437e+06	1.66458e+07	1.04726e+07	2.03416e+07	2.27482e+07	1.40516e+07	1.70917e+07	1.36526e+07	2.48339e+07	2.74819e+07	3.5061e+07	2.18847e+07	2.05356e+07	8.46179e+06	1.57871e+07	-	-	-
PDP155547	0.863434	3.37e-05	0.687922	0.00458593	6-Hydroxyrhamnocitrin 3-O-glucoside*	Flavonoids	Flavonols	C22H22O12	479.12	317.07	478.111	[M+H]+	1	-	-	7.60108e+06	4.85579e+06	7.37551e+06	6.62248e+06	1.14835e+07	1.04757e+07	2.17836e+07	1.88858e+07	8.62148e+06	1.16904e+07	1.58007e+07	2.03376e+07	2.41934e+07	2.37799e+07	3.1162e+07	1.79141e+07	1.4467e+07	2.56889e+07	-	-	-
PDP185740	0.852157	5.49e-05	0.686536	0.00470222	[6-[2-[2-(3,4-Dihydroxyphenyl)-5,7-dihydroxy-4-oxochromen-3-yl]oxy-4,5-dihydroxy-6-(hydroxymethyl)oxan-3-yl]oxy-3,4,5-trihydroxyoxan-2-yl]methyl 3-(4-hydroxy-2-methoxyphenyl)prop-2-enoate*	Flavonoids	Flavonols	C37H38O20	803.21	303.05	802.196	[M+H]+	2	-	-	686949	698528	793974	259127	245608	296784	2.43293e+06	2.42026e+06	2.87066e+06	1.75437e+06	2.08648e+06	1.93371e+06	2.50589e+06	3.19068e+06	2.60577e+06	2.50444e+06	2.81609e+06	2.13024e+06	-	-	-
PDP191674	0.878905	1.6e-05	0.723424	0.00230162	2-amino-2-phenylpropanenitrile	Alkaloids	Alkaloids	C9H10N2	147.09	130.07	146.084	[M+H]+	3	4355-46-8	-	144730	126471	121937	141953	117154	175537	245915	206593	194163	185930	220539	215110	236776	326510	247899	151969	217906	127577	-	-	-
PDP191978	0.968231	3.34e-09	0.628406	0.012109	Quercetin-3-O-(2'''-coumaroyl)glucosyl-(1→2)-glucoside	Flavonoids	Flavonols	C36H36O19	773.2	303.05	772.185	[M+H]+	1	-	-	136020	134992	121253	49857	54808.7	53036.4	368946	376424	330539	271979	316235	263287	467572	708713	615170	323814	393216	342876	-	-	-
PDP194462	0.861089	3.74e-05	0.796136	0.000383749	5-hydroxy-2-(3-hydroxy-4,5-dimethoxyphenyl)-7-{[3,4,5-trihydroxy-6-(hydroxymethyl)oxan-2-yl]oxy}-4H-chromen-4-one*	Flavonoids	Flavones	C23H24O12	493.13	331.08	492.127	[M+H]+	3	-	-	896042	1.03162e+06	945967	1.53528e+06	1.75573e+06	1.78046e+06	2.49907e+06	3.53185e+06	3.28697e+06	2.86281e+06	2.72416e+06	2.6255e+06	4.52874e+06	3.73912e+06	3.46148e+06	2.58793e+06	2.40335e+06	2.45542e+06	-	-	-
PDP226599	0.829001	0.000133203	0.819685	0.000183614	2-(3,4-Dihydroxyphenyl)-4-oxo-5,7-dihydroxy-4H-1-benzopyran-3-yl 2-O-(alpha-L-rhamnopyranosyl)-6-O-[(E)-3-(4-hydroxyphenyl)acryloyl]-beta-D-glucopyranoside*	Flavonoids	Flavonols	C36H36O18	757.2	303.05	756.19	[M+H]+	2	-	-	32214	19034.2	29014.1	9405.38	7426.31	18079.1	77337	99955.2	71585.6	124939	110222	79624.3	134366	131992	99838.1	77548.9	115795	82661.5	-	-	-
PDP230363	-0.811773	0.000237847	-0.655658	0.007959	Trans-N-Isoferuloyltyramine*	Alkaloids	Phenolamine	C18H19NO4	314.14	177.05	313.131	[M+H]+	1	-	-	1.47954e+07	1.75648e+07	9.44497e+06	1.05249e+07	1.49393e+07	8.8167e+06	5.18407e+06	5.15235e+06	3.63433e+06	6.29965e+06	1.07729e+07	7.6289e+06	1.56432e+06	2.09314e+06	1.76321e+06	7.40954e+06	8.50155e+06	8.38175e+06	-	-	-
PDP237118	0.942763	1.44e-07	0.678462	0.00542688	2-[(1r,6s)-6-methyl-7-oxabicyclo[4.1.0]hept-2-en-3-yl]propan-2-ol*	Terpenoids	Monoterpenoids	C10H16O2	169.12	81.07	168.115	[M+H]+	1	-	-	391437	309996	280025	599206	688842	590409	1.00756e+06	1.3009e+06	903710	807802	810374	854411	1.7373e+06	1.71669e+06	1.592e+06	795767	735278	1.05736e+06	-	-	-
PDP241186	0.919107	1.29e-06	0.660434	0.00736434	5,6,7,8-tetrahydroxy-2-(4-hydroxyphenyl)-3-{[3,4,5-trihydroxy-6-(hydroxymethyl)oxan-2-yl]oxy}-4H-chromen-4-one	Flavonoids	Flavonols	C21H20O13	481.1	319.04	480.09	[M+H]+	3	-	-	1.22445e+06	1.39334e+06	1.28497e+06	1.07828e+06	1.74701e+06	1.70246e+06	4.4609e+06	3.1553e+06	3.01704e+06	3.12181e+06	3.10686e+06	2.59818e+06	5.16131e+06	6.83565e+06	4.04896e+06	3.39053e+06	3.47743e+06	3.65271e+06	-	-	-
PDP243897	0.90477	3.59e-06	0.666532	0.0066565	N-[(2S)-1-hydroxypropan-2-yl]-2-[3,4,5-trihydroxy-6-(hydroxymethyl)oxan-2-yl]oxybenzamide	Alkaloids	Alkaloids	C16H23NO8	358.15	196.09	357.142	[M+H]+	1	-	-	13836.2	13836.2	13836.2	69181.2	110641	123751	153822	94060	125403	135436	79761.4	136640	306108	279979	307562	170589	113622	146706	-	-	-
PDP253775	0.840935	8.58e-05	0.776614	0.000660893	3-(4-hydroxy-2-methoxyphenyl)-2-[(4-hydroxy-3-methoxyphenyl)methyl]-2H-furan-5-one	Others	Others	C19H18O6	343.12	137.06	342.11	[M+H]+	3	-	-	112472	76358.1	67714.6	137373	112248	113786	95783	139400	121404	184992	246546	207263	282945	274365	330523	183673	194457	188053	-	-	-
PDP278657	0.907151	3.06e-06	0.65248	0.00837521	3-[(2S,3R,4S,5S,6R)-3-[(2S,3R,4S,5R,6R)-3-[(2S,3R,4S,5S,6R)-4,5-dihydroxy-6-(hydroxymethyl)-3-[(2S,3R,4S,5S,6R)-3,4,5-trihydroxy-6-(hydroxymethyl)oxan-2-yl]oxyoxan-2-yl]oxy-4,5-dihydroxy-6-(hydroxymethyl)oxan-2-yl]oxy-4,5-dihydroxy-6-(hydroxymethyl)oxan-2-yl]oxy-2-(3,4-dihydroxyphenyl)-5,7-dihydroxychromen-4-one	Flavonoids	Flavonols	C39H50O27	951.27	465.1	950.254	[M+H]+	3	-	-	160669	121793	95805.3	83661.8	83619.2	94235.2	509266	595831	478845	355329	395738	400086	465130	818725	912215	385287	445384	394328	-	-	-
pma0795	0.961001	1.24e-08	0.677441	0.00552455	Tricetin-5-O-(6''-malonyl)glucoside	Flavonoids	Flavones	C24H22O15	551.1	303.05	550.096	[M+H]+	3	-	-	120254	105175	117885	54968.1	18707.8	46002.1	157791	231499	229782	232778	286356	291647	516194	481138	540206	254937	302943	281179	-	-	-
pma0948	-0.917882	1.41e-06	-0.831102	0.000123578	Phenylethanolamine	Alkaloids	Alkaloids	C8H11NO	138.09	120.08	137.084	[M+H]+	3	7568-93-6	C02735	2.00114e+06	2.14166e+06	1.92433e+06	2.07671e+06	1.82663e+06	1.84785e+06	1.49217e+06	1.51066e+06	1.60316e+06	1.03963e+06	1.27939e+06	1.39246e+06	766682	711093	798644	1.50232e+06	1.51399e+06	1.44873e+06	-	C02735	-
pma3101	0.939118	2.13e-07	0.660219	0.00739037	Nicotinate D-ribonucleoside	Others	Vitamin	C11H14NO6+	256.08	124.04	256.082	[M]+	1	17720-18-2	C05841	3.2099e+06	2.7716e+06	2.75134e+06	3.76509e+06	3.06412e+06	3.95574e+06	6.00974e+06	5.28011e+06	5.27311e+06	4.052e+06	5.87994e+06	4.74835e+06	7.03622e+06	9.81796e+06	7.87284e+06	4.72258e+06	3.98115e+06	4.33402e+06	ko00760,ko01100	C05841	-
pmb0964	-0.912856	2.06e-06	-0.656774	0.00781688	Isopentenyladenine-7-N-glucoside	Nucleotides and derivatives	Nucleotides and derivatives	C16H23N5O5	366.18	204.12	365.17	[M+H]+	3	-	-	2.17212e+06	2.19915e+06	1.72146e+06	2.72739e+06	2.52533e+06	2.44641e+06	1.73089e+06	1.9071e+06	1.82364e+06	1.44724e+06	1.54488e+06	1.38178e+06	857028	659707	779419	1.83454e+06	1.97976e+06	2.17728e+06	-	-	-
pmc0682	0.934561	3.37e-07	0.617798	0.0141158	4-Aminoindole	Alkaloids	Plumerane	C8H8N2	133.08	116.05	132.069	[M+H]+	3	5192-23-4	-	32726.2	26646.5	32175.7	19083.7	48373.1	34891.9	41467.9	61349.4	39591.9	51433.7	83771	60773.2	152027	141641	142012	83715.4	53107.7	81352.5	-	-	-
pme0021	0.82775	0.000139219	0.785451	0.00052023	L-Phenylalanine	Amino acids and derivatives	Amino acids and derivatives	C9H11NO2	166.09	120.08	165.079	[M+H]+	1	63-91-2	C00079	1.78044e+07	2.01885e+07	1.73041e+07	3.03982e+07	2.78504e+07	3.1745e+07	6.85307e+07	7.34364e+07	7.71329e+07	5.77131e+07	5.41868e+07	5.87542e+07	7.33196e+07	8.12402e+07	7.25271e+07	5.37737e+07	5.05158e+07	5.50948e+07	ko00360,ko00400,ko00460,ko00470,ko00940,ko00960,ko00966,ko00970,ko00999,ko01100,ko01110,ko01210,ko01230,ko02010	C00079	-
pme0085	0.881161	1.43e-05	0.766729	0.000853341	Rosmarinate	Phenolic acids	Phenolic acids	C18H16O8	359.08	161.02	360.084	[M-H]-	3	537-15-5	C01850	10483	17441.6	10803.6	24857.3	33772.2	22938.2	33745.9	33860.5	27109	36508.1	38207.4	29556.8	58057.3	58780.2	49026.3	26724	42449.6	33524.1	ko00350,ko01100	C01850	-
pme0295	-0.841452	8.41e-05	-0.620374	0.0136063	4-Acetamidobutanoate	Organic acids	Organic acids	C6H11NO3	146.08	86.06	145.074	[M+H]+	3	3025-96-5	C02946	5.01782e+07	6.13423e+07	4.41526e+07	4.96195e+07	5.59177e+07	5.02942e+07	3.59721e+07	3.98105e+07	3.54483e+07	4.90108e+07	4.0647e+07	3.70547e+07	2.35043e+07	3.47281e+07	2.5445e+07	4.26768e+07	4.06743e+07	3.40087e+07	ko00330,ko01100	C02946	-
pme0422	0.912792	2.07e-06	0.841229	8.48e-05	Isoferulic Acid*	Phenolic acids	Phenolic acids	C10H10O4	193.05	134.04	194.058	[M-H]-	1	25522-33-2	C10470	1.18192e+07	1.07886e+07	1.02073e+07	1.26665e+07	1.36592e+07	1.40912e+07	1.50624e+07	1.6946e+07	1.69744e+07	1.89372e+07	1.91177e+07	1.84892e+07	2.41195e+07	2.56785e+07	2.13279e+07	1.47607e+07	1.75117e+07	1.72856e+07	-	C10470	MetMap168,MetMap170
pme1313	0.898543	5.33e-06	0.732184	0.00191128	L-Formylkynurenine	Amino acids and derivatives	Amino acids and derivatives	C11H12N2O4	237.09	192.07	236.08	[M+H]+	3	1022-31-7	C02700	22980.2	22217	23121	40212.4	42868.9	32607.3	54137.1	45414.4	52905.5	205822	216888	198423	333965	416070	401955	143309	179341	143080	ko00380,ko01100,ko01240	C02700	-
pme1398	0.909614	2.59e-06	0.602441	0.0174656	Delphinidin 3-O-glucoside	Flavonoids	Anthocyanidins	C21H21O12+	465.1	303.05	465.103	[M]+	3	50986-17-9	C12138	769259	512362	323378	184965	373206	574737	1.36029e+06	1.57504e+06	1.30205e+06	768619	1.47023e+06	1.44944e+06	2.00444e+06	2.36304e+06	3.65117e+06	2.82701e+06	1.22714e+06	2.25825e+06	ko00942,ko01110	C12138	MetMap119
pme2598	0.805261	0.000291759	0.695623	0.00398066	3,4-Dihydroxyphenylacetate*	Phenolic acids	Phenolic acids	C8H8O4	167.03	123.05	168.042	[M-H]-	3	102-32-9	C01161	111490	126161	92668	75880.7	83568.3	107021	90154.9	113126	95741.3	166098	186291	171852	225299	197342	223203	135233	158382	175040	ko00350,ko01100	C01161	MetMap172
pmf0132	-0.835172	0.000106562	-0.686715	0.00468702	Coumalic acid	Phenolic acids	Phenolic acids	C6H4O4	141.02	123.01	140.011	[M+H]+	3	500-05-0	-	346793	431727	305105	323903	433968	200305	180091	142427	204016	213235	137360	280718	44647.6	71386.1	56928.2	129292	195975	109760	-	-	-
pmf0138	0.861808	3.63e-05	0.837673	9.71e-05	D-Mannose*	Others	Saccharides	C6H12O6	179.06	59.01	180.063	[M-H]-	1	3458-28-4	C00159	2.63146e+06	2.72575e+06	2.59855e+06	3.00734e+06	3.12483e+06	3.44765e+06	3.43685e+06	3.25622e+06	3.2277e+06	3.49515e+06	4.10772e+06	3.84062e+06	4.48152e+06	4.56059e+06	4.38947e+06	3.26022e+06	3.34564e+06	3.4478e+06	ko00051,ko00052,ko00520,ko01100,ko01250,ko02010	C00159	-
pmf0139	0.800658	0.000335586	0.610087	0.0157292	D-Galactose*	Others	Saccharides	C6H12O6	179.06	59.01	180.063	[M-H]-	1	59-23-4	C00124	1.45717e+06	1.25184e+06	1.27895e+06	1.54808e+06	1.49419e+06	1.01321e+06	1.07869e+06	1.65251e+06	1.85238e+06	1.78754e+06	1.61274e+06	1.62396e+06	2.15426e+06	2.01154e+06	2.20076e+06	1.02728e+06	1.64035e+06	1.36401e+06	ko00052,ko01100	C00124	-
pmn001583	0.963512	8.11e-09	0.706905	0.00321032	Quercetin-3-O-robinobioside	Flavonoids	Flavonols	C27H30O16	609.15	300.03	610.153	[M-H]-	2	52525-35-6	-	2.06462e+06	1.66373e+06	1.5599e+06	883480	834759	1.04648e+06	3.69735e+06	3.78602e+06	4.26947e+06	3.64531e+06	3.81394e+06	4.05693e+06	5.77855e+06	7.27409e+06	5.83265e+06	3.18975e+06	3.26284e+06	3.83623e+06	-	CM00603	MetMap115
pmn001716	0.885851	1.11e-05	0.664339	0.00690462	Carthamone*	Flavonoids	Chalcones	C21H20O11	447.09	285.04	448.101	[M-H]-	3	86579-00-2	C08598	53867.8	137534	53233.9	27021.7	43257.8	30003.9	108893	97366.2	123356	106315	230518	244253	344354	290680	346840	134518	144165	128884	-	C08598	-
pmp000589	0.951774	4.83e-08	0.630682	0.0117089	Quercetin-7-O-(6''-malonyl)glucoside*	Flavonoids	Flavonols	C24H22O15	551.1	303.05	550.096	[M+H]+	3	98767-37-4	-	128787	144552	96828.3	23605.5	49655.3	33195.8	240014	240873	234620	407125	338053	327439	583295	995175	849331	381543	277521	395373	-	CM00583	MetMap116
pmp000607	0.877717	1.7e-05	0.696591	0.00390926	1-desmethylaurantio-obtusin-2-O-β-D-glucoside	Quinones	Anthraquinone	C22H22O12	479.12	317.06	478.111	[M+H]+	3	-	-	7.66402e+06	3.93366e+06	1.1927e+07	5.25979e+06	1.27801e+07	1.44294e+07	2.14377e+07	1.41015e+07	1.74988e+07	1.6573e+07	1.5321e+07	1.62658e+07	2.31469e+07	2.75169e+07	2.51031e+07	2.23249e+07	1.52184e+07	1.4412e+07	-	-	-
pmp001187	-0.934633	3.35e-07	-0.681992	0.00509995	1-(Dihydroxyphenyl)-N2,N3-bis(4-hydroxyphenethyl)-(5-8)-dimethoxy-1,2dihydronaphthalene-2,3-dicarboxamide	Alkaloids	Phenolamine	C36H36N2O8	625.25	460.2	624.247	[M+H]+	1	-	-	7.93922e+06	8.85118e+06	7.21921e+06	6.54508e+06	7.37464e+06	6.37813e+06	3.65829e+06	4.14246e+06	4.24135e+06	4.49897e+06	6.33167e+06	5.402e+06	1.09297e+06	1.29369e+06	1.12921e+06	5.04301e+06	5.69862e+06	5.36584e+06	-	-	-
Qmxp101537	0.924626	8.24e-07	0.650783	0.00860424	Lophanthoidin	Terpenoids	Ditepenoids	C20H32O2	305.25	147.12	304.24	[M+H]+	2	-	-	93168.6	92631.6	81804.2	46742.4	34787.6	49036	96686.6	101881	85932.5	199878	161415	166778	292174	344522	280148	188034	125192	165337	-	-	-
Rdp02758	0.869531	2.54e-05	0.686456	0.00470899	Quercetin 3-(2''-glucosylgalactoside) 7-glucoside*	Flavonoids	Flavonols	C33H40O22	789.21	465.1	788.201	[M+H]+	1	-	-	2.3376e+06	3.57556e+06	2.71647e+06	1.53586e+06	1.36423e+06	901949	1.04124e+07	1.02635e+07	1.02032e+07	8.43657e+06	7.16756e+06	8.92225e+06	1.59775e+07	1.37656e+07	8.8026e+06	7.49965e+06	7.26909e+06	8.57907e+06	-	-	-
Rfn02252	0.975361	6.5e-10	0.664056	0.00693714	6-Hydroxy-2-oxo-1,2-dihydroquinoline-4-carboxylic acid*	Alkaloids	Quinoline alkaloids	C10H7NO4	206.04	160.04	205.037	[M+H]+	1	4363-99-9	-	1.02793e+06	959141	857253	1.07857e+06	1.22984e+06	935390	1.56758e+06	1.48597e+06	1.42095e+06	1.57388e+06	1.35919e+06	1.68965e+06	2.44018e+06	2.94992e+06	2.67327e+06	1.40907e+06	1.48762e+06	1.43702e+06	-	-	-
Rfn072621	0.917886	1.41e-06	0.76125	0.000978179	6-Hydroxyluteolin 7-rutinoside*	Flavonoids	Flavones	C27H30O16	609.15	301.04	610.153	[M-H]-	1	-	-	287854	463289	275705	178897	318451	228998	952767	535502	868942	740921	1.09131e+06	1.0118e+06	1.49989e+06	1.31533e+06	1.46411e+06	976847	833414	813679	-	-	-
Rlp00485	-0.807306	0.000273847	-0.82143	0.000173141	Feruloyl-beta-phenethylamine	Alkaloids	Phenolamine	C18H19NO3	298.14	177.05	297.137	[M+H]+	1	142351-00-6	-	1.66099e+06	2.27004e+06	1.71877e+06	1.1249e+06	1.45075e+06	1.31761e+06	623376	696719	739966	595448	885395	1.03669e+06	322380	339889	305809	944656	1.1181e+06	1.12856e+06	-	-	-
Rlp00616	0.913121	2.02e-06	0.634495	0.0110617	Isorhamnetin 3-beta-laminaribioside*	Flavonoids	Flavonols	C28H32O17	641.17	317.06	640.164	[M+H]+	3	-	-	268210	309832	220708	492771	226662	91141.5	1.01063e+06	737892	1.14267e+06	523870	628976	897576	1.08374e+06	1.63268e+06	1.37179e+06	566794	533453	1.11088e+06	-	-	-
Rlp01511	0.972123	1.44e-09	0.660986	0.00729798	7-Hydroxy-1-oxo-1,2-dihydroisoquinoline-5-carboxylic acid*	Alkaloids	Alkaloids	C10H7NO4	206.04	160.04	205.037	[M+H]+	1	-	-	1.19062e+06	1.17996e+06	932163	1.23663e+06	1.26936e+06	1.16095e+06	1.82518e+06	1.86554e+06	1.61371e+06	1.73931e+06	1.86471e+06	1.65378e+06	2.9619e+06	3.43001e+06	2.63528e+06	1.8667e+06	1.85852e+06	1.77286e+06	-	-	-
Rlp02599	0.901588	4.41e-06	0.605065	0.0168541	furo[2,3-h]quinoline	Alkaloids	Quinoline alkaloids	C11H7NO	170.06	115.05	169.053	[M+H]+	1	-	-	484174	606792	415024	810003	846359	530639	897209	1.03159e+06	977892	954126	773925	1.1988e+06	2.27519e+06	2.31505e+06	1.3937e+06	757238	1.0492e+06	744596	-	-	-
Rlp03843	0.863616	3.34e-05	0.635369	0.0109174	Tamarixetin 7-rutinoside*	Flavonoids	Flavonols	C28H32O16	625.18	317.07	624.169	[M+H]+	1	14265-53-3	-	9.69039e+06	8.51504e+06	9.98594e+06	9.2213e+06	1.46617e+07	1.5532e+07	2.31289e+07	2.53131e+07	2.6244e+07	1.43617e+07	1.75372e+07	1.97681e+07	2.84012e+07	2.59125e+07	3.40448e+07	2.14227e+07	1.36999e+07	2.19966e+07	-	-	-
Rlp0729	0.876954	1.77e-05	0.73615	0.00175301	(1S,5S,6S)-3-Amino-5-hydroxy-7-oxabicyclo[4.1.0]hept-3-EN-2-one	Alkaloids	Alkaloids	C6H7NO3	142.05	124.04	141.043	[M+H]+	3	89020-30-4	-	70620.4	110645	55384	164864	135432	137853	185060	180479	242109	317600	146445	208172	346366	346581	417337	173736	159746	113843	-	-	-
Sadp000595	-0.801881	0.000323446	-0.698403	0.00377848	5-Methylnicotinic acid	Alkaloids	Alkaloids	C7H7NO2	138.05	92.05	137.048	[M+H]+	1	-	-	213877	195560	250010	220008	182090	218671	183977	187551	226561	107964	186277	173418	125702	100868	98602.2	173528	166722	215792	-	-	-
Sadp000724	0.887463	1.02e-05	0.634689	0.0110295	N-Acetyl-3-Methylhistidine	Amino acids and derivatives	Amino acids and derivatives	C9H13N3O3	212.1	124.09	211.096	[M+H]+	2	-	-	701690	606750	654382	613903	626044	666612	599502	639973	681445	757977	858478	878931	1.07675e+06	1.13213e+06	1.1252e+06	1.08906e+06	752725	971911	-	-	-
Sadp000900	0.965061	6.14e-09	0.721257	0.00240737	6-Acetamido-3-oxohexanoate	Alkaloids	Alkaloids	C8H13NO4	188.09	124.08	187.084	[M+H]+	1	-	C03682	1.2252e+06	1.44149e+06	1.25626e+06	2.53221e+06	2.39203e+06	2.7356e+06	4.05456e+06	4.30031e+06	4.64583e+06	4.15396e+06	3.8413e+06	4.63549e+06	7.07736e+06	9.40909e+06	8.49269e+06	4.79992e+06	4.40183e+06	4.34431e+06	-	C03682	-
Sadp001226	-0.882813	1.31e-05	-0.625617	0.0126136	2-(Hydroxymethyl)-3-pyridinol	Alkaloids	Alkaloids	C6H7NO2	126.06	53.04	125.048	[M+H]+	1	-	-	82240.2	86644.9	115346	72006.9	101611	66392.4	72862.5	76809.3	48740.2	69766.8	58528.4	74817.5	28249.2	10829.7	18181.6	46898.9	55488.3	71393	-	-	-
Sadp001705	0.903189	3.98e-06	0.648334	0.00894342	N-Benzyloxycarbonyl-L-asparagine	Others	Others	C12H14N2O5	267.1	150.05	266.09	[M+H]+	2	2304-96-3	-	612504	544588	508121	677346	660414	693126	696312	637891	645509	707772	825599	850680	1.22875e+06	1.31199e+06	1.08369e+06	762292	758105	787765	-	-	-
Sadp003004	0.898464	5.36e-06	0.606689	0.0164838	Indole-4-Carboxaldehyde*	Alkaloids	Alkaloids	C9H7NO	146.06	118.09	145.053	[M+H]+	1	1074-86-8	-	689846	641041	513679	943455	929434	577808	1.02124e+06	1.07996e+06	1.08105e+06	1.13554e+06	849332	1.17126e+06	2.15178e+06	2.32242e+06	1.39426e+06	729188	1.17371e+06	919565	-	-	-
Sadp003518	0.821937	0.00017019	0.704987	0.0033321	Abscisic acid glucose ester*	Terpenoids	Sesquiterpenoids	C21H30O9	427.2	265.14	426.189	[M+H]+	2	-	C15970	800514	879150	843056	1.1376e+06	823080	522531	1.67352e+06	1.93127e+06	1.9037e+06	1.89742e+06	2.09684e+06	2.23627e+06	4.2296e+06	2.99001e+06	1.76911e+06	977948	2.19996e+06	1.08518e+06	ko00906,ko01100,ko01110	C15970	-
Safn002792	0.939667	2.01e-07	0.744846	0.00144279	Kaempferol-3-O-Gentiobioside-7-O-Rhamnoside*	Flavonoids	Flavonols	C33H40O20	755.2	593.15	756.211	[M-H]-	1	-	-	314102	325258	335930	238179	223512	270850	1.04384e+06	910980	1.18967e+06	949793	835959	931561	1.41634e+06	1.4962e+06	1.43074e+06	809885	812409	829774	-	-	-
Safn004708	0.883572	1.26e-05	0.875273	1.93e-05	(2S,3R,4S,5S,6R)-3,4,5-trihydroxy-6-(hydroxymethyl)oxan-2-yl(2E,6E)-8-hydroxy-2,6-dimethylocta-2,6-dienoate	Terpenoids	Monoterpenoids	C16H26O8	405.18	183.1	346.163	[M+CH3COOH-H]-	1	-	-	52845.2	62182.7	55838.2	93958.7	97005	94022.3	158423	203191	186106	216834	173286	191690	250358	240972	266609	180982	144267	163106	-	-	-
Safn004850	-0.858266	4.24e-05	-0.777269	0.000649508	3'-O-β-Glucopyranosyl plumbagic acid methyl ester	Phenolic acids	Phenolic acids	C18H24O10	459.15	237.08	400.137	[M+CH3COOH-H]-	2	-	-	53053.2	51919.4	43907.1	58068.5	60401.3	62252.7	28760.8	30829.2	24559	16009.4	21439.5	31000.7	13147.2	10727.7	15057.1	38451.6	38446.8	27270.9	-	-	-
Safp000622	-0.906324	3.24e-06	-0.801028	0.00033188	Acetylcholine	Alkaloids	Alkaloids	C7H16NO2+	146.12	87.04	146.118	[M]+	3	51-84-3	C01996	2.95531e+07	2.62596e+07	2.68913e+07	2.26766e+07	2.58451e+07	2.22706e+07	1.79799e+07	1.74445e+07	2.11605e+07	1.8151e+07	1.9831e+07	1.91798e+07	1.28204e+07	1.11391e+07	1.27123e+07	2.36978e+07	2.65376e+07	2.09875e+07	ko00564	C01996	-
Safp001018	-0.855963	4.68e-05	-0.702468	0.00349765	3-Carboxypropyltrimethylammonium	Others	Others	C7H15NO2	146.12	87.04	145.11	[M+H]+	3	6249-56-5	-	2.37465e+07	2.6946e+07	2.12299e+07	2.37057e+07	2.08727e+07	2.02252e+07	1.77749e+07	1.52301e+07	1.80155e+07	1.96573e+07	1.55485e+07	2.03458e+07	1.28475e+07	1.3895e+07	1.11855e+07	1.40624e+07	1.9355e+07	1.76185e+07	-	-	-
Sakn003347	0.967788	3.65e-09	0.650171	0.00868805	3,4-Dihydroxyphenylethanol-8-O-(β-D-apinosyl(1→3)-D-glucosyl(1→6)]-β-D-glucoside	Phenolic acids	Phenolic acids	C25H38O17	609.2	447.15	610.211	[M-H]-	3	-	-	15785	16660.5	13124.6	5464.08	13702.9	9693.02	50076.5	61017.3	45698.1	31881.8	44926.5	44924.5	94872.6	98425.1	73081.1	37851.3	37437.7	55044.1	-	CM02905	MetMap172
Sasn002290	0.989268	3.03e-12	0.619781	0.0137224	6-Ethoxygeniposide	Terpenoids	Monoterpenoids	C19H28O11	431.15	165.06	432.163	[M-H]-	2	1264496-61-8	-	408868	379295	320509	276971	312567	345359	823311	866205	805632	619478	657566	713764	1.55241e+06	1.47602e+06	1.34725e+06	821298	840330	823768	-	-	-
Sasn003876	0.941027	1.74e-07	0.747112	0.00136968	(4R)-4-[(1E,3R)-4-hydroxy-3-{[(2R,3R,4S,5R,6R)-3,4,5-trihydroxy-6-(hydroxymethyl)oxan-2-yl]oxy}but-1-en-1-yl]-3,5,5-trimethylcyclohex-2-en-1-one	Others	Others	C19H30O8	445.21	205.12	386.194	[M+CH3COOH-H]-	2	-	-	1.46071e+06	1.5457e+06	1.33464e+06	1.65364e+06	1.65028e+06	1.45822e+06	1.63443e+06	1.86112e+06	1.79906e+06	2.01269e+06	1.9248e+06	2.12448e+06	2.638e+06	2.69679e+06	2.65038e+06	1.97194e+06	1.85353e+06	1.97267e+06	-	-	-
Wahlp02159	0.80986	0.000252756	0.74054	0.00159032	D-Pantothenic Acid 4'-O-Beta-Glucoside	Others	Vitamin	C15H27NO10	382.17	220.12	381.163	[M+H]+	1	29588-37-2	-	806491	654474	522671	548879	583079	747214	1.00453e+06	900444	898494	1.02861e+06	928981	917526	895730	1.14699e+06	1.1794e+06	1.0979e+06	1.13676e+06	876783	-	-	-
Wahsn02562	0.952975	4.11e-08	0.63583	0.0108418	Tichocarpol A*	Phenolic acids	Phenolic acids	C9H10O7S	261.01	181.05	262.015	[M-H]-	3	-	-	73405.8	70620.8	56457.9	54373.5	60115.3	46239.6	89017.8	80175.5	105564	86007.5	101618	133386	162976	190868	202193	110906	114872	114019	-	-	-
WapTKC019339	0.923212	9.27e-07	0.621289	0.013429	Ligurobustoside F	Terpenoids	Monoterpenoids	C31H44O13	625.29	147.05	624.278	[M+H]+	3	189276-46-8	-	11775.4	13751.9	26693.3	14580.5	11058	7599.45	31454.4	19463.5	19158.7	95534.6	65489	65000.4	183571	220457	171826	64741.3	64499.7	70036.4	-	-	-
WapTKC020226	0.949958	6.12e-08	0.616487	0.0143806	Jasminoside H	Terpenoids	Monoterpenoids	C22H36O12	493.23	169.12	492.221	[M+H]+	1	1033721-36-6	-	216073	210741	189480	203258	816637	458994	1.52859e+06	969897	1.36313e+06	928065	645528	1.10846e+06	2.69232e+06	2.91385e+06	2.06366e+06	1.18141e+06	684383	1.07067e+06	-	-	-
WapTKC024651	0.921096	1.1e-06	0.740608	0.00158791	3-Hydroxy-5,7-Megastigmadien-9-one 3-O-β-D-Glucopyranoside*	Terpenoids	Sesquiterpenoids	C19H30O7	371.21	209.15	370.199	[M+H]+	1	488128-40-1	-	611514	357445	588126	247689	367120	372417	1.4206e+06	1.06435e+06	1.2055e+06	3.4787e+06	3531415	3.40155e+06	5.37307e+06	6.69849e+06	6.73141e+06	2.9447e+06	2.35677e+06	2.44627e+06	-	-	-
WapTKC025162	0.862233	3.56e-05	0.618138	0.0140478	Byzantionoside A*	Terpenoids	Sesquiterpenoids	C19H30O7	371.2	191.14	370.199	[M+H]+	1	189109-41-9	-	95694.5	158716	172671	86271.9	82061.2	76877.2	108677	151855	166925	153398	254289	253766	340539	335181	297770	162841	274567	185879	-	-	-
WapTKC025427	0.903776	3.83e-06	0.775941	0.000672769	5-Megastigmen-7-Yne-3,9-diol 3-O-β-D-Glucopyranoside*	Terpenoids	Sesquiterpenoids	C19H30O7	371.21	209.15	370.199	[M+H]+	1	62512-27-0	-	236007	156507	146801	84962.5	177984	107515	448855	491452	315141	1.14175e+06	1.28648e+06	980338	1.63162e+06	1.92039e+06	1.8701e+06	582681	668396	562460	-	-	-
WapTKC027786	0.900062	4.85e-06	0.669678	0.00631279	Sarcaglaboside F	Terpenoids	Sesquiterpenoids	C21H28O10	441.17	279.12	440.168	[M+H]+	3	1159993-45-9	-	84124.2	98252.1	87299	108389	15420.6	64582.5	152365	125900	118990	154508	139290	164158	181306	246947	242699	138371	131634	168915	-	-	-
WapTKC030186	0.856044	4.66e-05	0.769704	0.000791186	Prenantheside A*	Terpenoids	Sesquiterpenoids	C21H30O9	427.2	265.14	426.189	[M+H]+	2	112606-68-5	-	856380	819809	765554	1.24473e+06	988609	556954	1.60244e+06	1.77369e+06	1.54677e+06	2.21823e+06	2.4068e+06	2.20966e+06	3.62606e+06	3.79285e+06	1.95933e+06	837535	2.05503e+06	1.31996e+06	-	-	-
WapTKC038469	0.924962	8.01e-07	0.731044	0.00195881	4-Hydroxy-11,12,13-Trinor-1(5),6,9-Guaiatrien-8-one	Terpenoids	Sesquiterpenoids	C12H14O2	191.11	91.06	190.099	[M+H]+	3	1966155-61-2	-	311956	228253	213023	278092	299252	243259	429143	436789	434163	772869	806354	552514	1.22938e+06	1.12132e+06	1.32545e+06	779861	546977	659511	-	-	-
WapTKC044151	0.920936	1.11e-06	0.727766	0.00210087	14(5)-Abeo-13-Hydroxy-9-Methoxy-1,3,5,9-Furanoeremophilatetraen-14-al	Terpenoids	Sesquiterpenoids	C16H14O4	271.1	239.07	270.089	[M+H]+	1	62706-43-8	-	1522.95	1522.95	1522.95	21433.9	7787.78	7614.74	23368.6	34053.5	20854	43028.5	27950.9	31594.4	87229	76184	56585.9	36344.9	24712.3	24592.7	-	-	-
WapTKC047021	0.910245	2.48e-06	0.600294	0.0179789	Anhydroprasinoxanthin	Terpenoids	Tetraterpenes	C40H54O3	583.41	181.12	582.407	[M+H]+	2	-	-	21780.2	19281.5	32895.1	17932.3	20966.3	17802.9	83185.7	83677.3	67760.7	32501.9	58001.9	55705.1	109517	92573.3	99478.9	62177.9	63794.6	63359.7	-	-	-
WapTKC057030	-0.830155	0.000127844	-0.702307	0.00350845	Inonotsutriol E	Terpenoids	Triterpene	C30H50O3	459.38	423.36	458.376	[M+H]+	2	928840-27-1	-	504563	511181	532326	313050	341797	460905	205429	223017	229632	394960	321472	269695	112807	142689	141399	298590	364166	384333	-	-	-
WapTKC122495	0.828471	0.000135725	0.711276	0.00294601	O-beta-D-Glucosylzeatin	Alkaloids	Alkaloids	C16H23N5O6	382.17	220.12	381.165	[M+H]+	1	56329-06-7	C03423	506658	580453	638214	785421	942450	491062	998375	809193	797037	888056	791944	1.01967e+06	1.19704e+06	1.29534e+06	1.07118e+06	622920	943998	593429	ko00908,ko01110	C03423	-
WapTKC170438	0.864458	3.22e-05	0.683382	0.00497555	(2S,4aR,4bS,6aS,10S,11aR,11bS)-2-hydroxy-1,1,4a,6a,7,11a-hexamethyl-10-prop-1-en-2-yl-2,3,4,4b,6,9,10,11,11b,12-decahydroindeno[2,1-a]phenanthren-5-one	Terpenoids	Triterpene	C30H42O2	435.33	145.1	434.318	[M+H]+	2	-	-	44713.5	31879.5	56121.1	46133.7	55535.5	40143.9	167703	119766	105215	72603.3	113111	115855	172847	158469	143098	132079	129108	182986	-	-	-
Waptn02876	-0.905121	3.51e-06	-0.737558	0.00169944	4-(2-hydroxyvinyl)benzene-1,2-diol Glucoside*	Others	Alcohol compounds	C14H18O8	313.09	151.04	314.1	[M-H]-	2	-	-	263471	314795	271732	276822	249064	230161	200891	149197	204662	216822	154797	195146	135918	86052.3	59882.5	203567	221775	155362	-	-	-
Waptp04899	0.890532	8.57e-06	0.62283	0.0131342	Jaceosidin-7-O-(6''-O-p-coumaroyl)glucoside-4'-O-glucoside	Flavonoids	Flavones	C38H40O19	801.22	331.08	800.216	[M+H]+	2	-	-	547218	567588	502541	757502	1.23322e+06	833339	1.77927e+06	2.1213e+06	2.33653e+06	1.63363e+06	1.54711e+06	1.28944e+06	4.33037e+06	3.27766e+06	2.33161e+06	1.42635e+06	1.75982e+06	1.62754e+06	-	-	-
Wasn002933	0.877712	1.7e-05	0.64354	0.00963766	1-O-(3,4,5-Trimethoxybenzoyl)-B-D-Glucopyranoside	Phenolic acids	Phenolic acids	C16H22O10	373.11	211.06	374.121	[M-H]-	2	-	-	156111	109762	99410.7	136674	158357	166039	212578	100393	123547	191366	231927	228158	346659	393861	353146	192737	126382	153412	-	CM02473	MetMap157,MetMap160
Wasn003141	0.927731	6.32e-07	0.794824	0.000398727	Glucosyl 3,7-dimethylocta-2,6-diene-1,4,8-trio	Others	Others	C16H28O8	407.19	185.12	348.178	[M+CH3COOH-H]-	1	-	-	9026.27	4529.21	4406.94	10237.1	9159.98	17902	31823.8	42069.5	22956.7	40603.9	55961.9	58322.2	78288.9	85046.5	98935.3	42640.9	34567.4	50191.3	-	-	-
Wasn004683	0.964317	7.03e-09	0.656456	0.00785719	Protocatechuic acid 1-O-(Glucosylvanilloyl)	Phenolic acids	Phenolic acids	C21H22O12	465.1	303.05	466.111	[M-H]-	3	-	-	67135.5	55428.3	88257.2	33816	18701.9	22795.8	189199	160172	176173	140839	150071	166206	315775	272036	314074	179487	145011	110544	-	-	-
Wasyqp2134	0.991475	6.82e-13	0.674898	0.00577365	2-(2-hydroxy-1H-indol-3-yl)-2-oxoacetic acid*	Alkaloids	Plumerane	C10H7NO4	206.04	160.04	205.037	[M+H]+	1	14370-71-9	-	1.25516e+06	1.23862e+06	1.00845e+06	1.19119e+06	1.17659e+06	1.18541e+06	1.74963e+06	1.77019e+06	1.72974e+06	1.75662e+06	1.6586e+06	1.83787e+06	2.86935e+06	3.00609e+06	2.72957e+06	1.76936e+06	1.84087e+06	1.65009e+06	-	-	-
WaYn002146	0.875287	1.92e-05	0.705138	0.00332241	2-(Hydroxymethyl)Phenyl 2-O-Beta-D-Glucopyranosyl-Beta-D-Glucopyranoside	Phenolic acids	Phenolic acids	C19H28O12	507.17	179.06	448.158	[M+CH3COOH-H]-	1	-	-	80596.7	70381.7	60768.2	101507	113659	109688	99353.9	119226	100117	108951	161876	133189	234217	199202	211212	144739	108207	158998	-	-	-
WaYn002949	0.811718	0.000238264	0.772967	0.000727294	Isosalicin	Phenolic acids	Phenolic acids	C13H18O7	285.1	89.02	286.105	[M-H]-	1	-	-	65908.9	59674	72938.7	52512.9	46914.5	59336.6	93880.5	76642.5	86572.8	104485	96875.5	122220	95158.7	127427	129850	79922.4	93038.8	100368	-	CM02827	MetMap164
Wayp004564	0.829833	0.00012932	0.608228	0.0161385	gamma-Hydroxy-3-pyridinebutanoate	Alkaloids	Pyridine alkaloids	C9H11NO3	182.08	136.08	181.074	[M+H]+	3	15569-97-8	C19579	293425	274289	306657	221947	472551	423555	377224	303849	328422	489884	360979	517237	805639	724198	659482	437574	276834	491057	-	C19579	-
Wbjp001606	0.862636	3.49e-05	0.814612	0.000217055	3-(4-aminobut-1-en-1-yl)-4,7-dihydro-1-indole-5,6-dione	Alkaloids	Alkaloids	C12H14N2O2	219.11	176.07	218.106	[M+H]+	3	-	-	2314.69	2314.69	2314.69	2314.69	2314.69	2314.69	15168.6	11573.4	16655.4	35133.4	39853.7	53675.8	52106.9	75247.6	50342.4	21160.4	31496.2	35889.3	-	-	-
Wbjp002330	0.958688	1.8e-08	0.604883	0.0168958	1,3-dihydroxy-2,3,3a,4-tetrahydropyrrolo[2,1-b]quinazolin-9(1H)-one	Alkaloids	Alkaloids	C11H12N2O3	221.09	175.09	220.085	[M+H]+	2	-	-	509705	464309	432120	801960	802966	740546	932597	1.04685e+06	1.06081e+06	848176	1.0019e+06	914233	2.04973e+06	2.36865e+06	2.20821e+06	945084	1.07942e+06	967492	-	-	-
Wbjp005803	-0.929068	5.61e-07	-0.684435	0.00488297	5-((1E,3Z)-3-((3,4-dihydroxyphenethyl)imino)-3-hydroxyprop-1-en-1-yl)-2-(4-hydroxy-3-methoxyphenyl)-N-(4-hydroxyphenethyl)-7-methoxy-2,3-dihydrobenzofuran-3-carbimidic acid	Alkaloids	Alkaloids	C36H36N2O9	641.25	325.11	640.242	[M+H]+	1	-	-	173154	202102	190851	203635	220358	183944	93340.5	144761	115846	101163	154606	135881	56157.9	59846.2	47232.5	161168	148263	122407	-	-	-
Wbjp006632	-0.902594	4.13e-06	-0.694535	0.0040621	Tribulusamide A*	Alkaloids	Alkaloids	C36H36N2O8	625.25	325.11	624.247	[M+H]+	1	-	-	400677	480402	460455	385905	324197	367372	216113	230204	240202	244913	388253	259948	88030.1	111970	80278	387965	358355	341976	-	-	-
Wbjp006749	-0.919727	1.23e-06	-0.635271	0.0109334	N-(4-Hydroxyphenethyl)-2-(3-methoxy-4-hydroxyphenyl)-5-[(Z)-2-[2-methoxy-4-[(E)-2-[(4-hydroxyphenethyl)carbamoyl]ethenyl]phenoxy]-2-[(4-hydroxyphenethyl)carbamoyl]ethenyl]-7-methoxy-2,3-dihydrobenzofuran-3-carboxamide	Alkaloids	Alkaloids	C54H53N3O12	936.37	799.29	935.363	[M+H]+	1	-	-	8.56436e+06	1.21732e+07	9.16522e+06	8.13396e+06	8.34148e+06	8.23213e+06	4.75015e+06	5.24747e+06	6.01804e+06	6.13946e+06	7.7429e+06	7.64631e+06	1.24877e+06	1.5695e+06	1.56741e+06	8.83984e+06	7.59472e+06	7.75863e+06	-	-	-
Wbmp003345	0.929907	5.21e-07	0.64948	0.00878346	Cimicifugic acid A-glucose	Phenolic acids	Phenolic acids	C27H30O16	609.15	447.1	610.153	[M-H]-	2	-	-	270491	302410	328337	205316	201848	149581	852548	757740	681733	633780	592728	762977	787728	1.42152e+06	1.38573e+06	654679	739400	755280	-	-	-
Wccp001353	0.829981	0.000128641	0.606254	0.0165822	(1S,12S,14R)-4-methyl-11-oxa-4-azatetracyclo[8.6.1.01,12.06,17]heptadeca-6(17),7,9,15-tetraen-14-ol	Alkaloids	Alkaloids	C16H19NO2	258.14	84.08	257.142	[M+H]+	2	-	-	2.53921e+06	2.64754e+06	2.04899e+06	2.53849e+06	2.8239e+06	2.61178e+06	2.62575e+06	2.58783e+06	2.54181e+06	2.86724e+06	2.78856e+06	2.96134e+06	3.28617e+06	4.07064e+06	3.31205e+06	2.87204e+06	2.99004e+06	2.95331e+06	-	-	-
Wcdp001953	0.913249	2e-06	0.607318	0.0163419	2-methyl-1-nitronaphthalene	Others	Others	C11H9NO2	188.07	118.07	187.063	[M+H]+	1	881-03-8	-	3.12952e+07	2.72127e+07	2.38693e+07	3.7917e+07	3.65147e+07	2.54352e+07	4.43773e+07	4.76599e+07	5.08012e+07	4.6523e+07	3.77168e+07	5.16761e+07	9.36875e+07	9.77852e+07	5.98831e+07	3.17608e+07	5.05251e+07	3.66718e+07	-	-	-
Wcdp004536	0.92732	6.55e-07	0.703198	0.00344902	3-hydroxy-beta-ionone*	Terpenoids	Monoterpenoids	C13H20O2	209.15	137.1	208.146	[M+H]+	1	-	-	567653	459189	395601	506409	454647	424995	743593	705829	579244	1.07426e+06	1.32181e+06	1.16795e+06	1.74687e+06	2.18558e+06	2.26705e+06	1.19079e+06	1.21985e+06	1.15255e+06	-	-	-
Wcfp003695	0.800834	0.000333821	0.747803	0.00134801	Oleracone B	Others	Others	C13H18O2	207.14	95.08	206.131	[M+H]+	2	-	-	8.60101e+06	7.18393e+06	8.10066e+06	6.93003e+06	9.17376e+06	1.06466e+07	1.35226e+07	1.13635e+07	1.11409e+07	1.26147e+07	9.87995e+06	1.28685e+07	1.48281e+07	1.24516e+07	1.47325e+07	1.34213e+07	1.12807e+07	1.47138e+07	-	-	-
Wcop005984	0.943428	1.34e-07	0.707593	0.00316754	2,5,6,7-tetramethyl-2,3-dihydro-1H-inden-1-ol*	Terpenoids	Sesquiterpenoids	C13H18O	191.14	133.1	190.136	[M+H]+	1	-	-	991136	783333	757658	936115	989634	857228	1.51928e+06	1.38712e+06	1.29302e+06	2.11474e+06	2.40498e+06	2.01716e+06	4.30717e+06	3.85661e+06	3.90274e+06	2.08555e+06	1.7964e+06	2.03271e+06	-	-	-
Wmxn004035	0.883314	1.27e-05	0.631352	0.0115931	Phyllanthusol A	Terpenoids	Sesquiterpenoids	C35H49NO19	786.28	786.28	787.29	[M-H]-	2	294864-88-3	-	220463	187801	307791	278480	233845	279166	357523	340564	459005	295931	381221	314050	473703	512286	464352	373102	446321	292280	-	-	-
Yaap004664	0.922794	9.59e-07	0.75082	0.00125654	3-Oxo-Alpha-Ionol,4-(3-Hydroxy-1-Butenyl)-3,5,5-Trimethyl-2-Cyclohexen-1-One	Others	Others	C13H20O2	209.15	137.09	208.146	[M+H]+	2	110114-85-7	-	528661	421974	367820	437269	603629	508691	766490	673318	616952	1.15425e+06	1.29775e+06	1.1488e+06	1.73744e+06	2.02349e+06	2.03415e+06	1.06556e+06	1.30539e+06	1.18159e+06	-	-	-
Ymjm000116	-0.911561	2.26e-06	-0.750653	0.00126147	6-O-Acetylarbutin*	Others	Others	C14H18O8	313.09	151.04	314.1	[M-H]-	2	10338-88-2	-	355127	252856	287519	275201	240798	249684	195992	206672	218103	212712	172873	204678	93364.5	92385.2	82821.4	176544	221040	173161	-	-	-
Zahp003766	0.898145	5.46e-06	0.683252	0.00498706	Quercetin 3-O-glucoside 7-O-xyloside	Flavonoids	Flavonols	C26H28O16	597.15	303.05	596.138	[M+H]+	3	-	-	19428.9	13820.9	26994.3	10713.3	14740.4	19996.3	37772.6	76708.2	73528.8	63584.7	60120.2	61006.5	107424	141217	69552.2	68650.6	78517.3	49044.7	-	CM00591	MetMap115
Zbfp003232	0.991104	8.99e-13	0.601733	0.0176337	Delphinidin-3-caffeoyl-rutinoside-5-glucoside	Flavonoids	Anthocyanidins	C42H47O24+	935.25	303.05	935.245	[M]+	3	-	-	170147	119854	192711	119286	221771	151093	582120	685240	627030	488599	446617	517524	1.28302e+06	1.66764e+06	1.48373e+06	736085	464465	716033	-	-	-
Zbjp002396	0.827422	0.000140835	0.62532	0.0126684	Kaempferol-3-O-sophoroside-7-O-glucoside*	Flavonoids	Flavonols	C33H40O21	773.21	287.06	772.206	[M+H]+	2	55136-76-0	-	764608	771266	681836	256746	180854	198920	2.00559e+06	2.15178e+06	1.98899e+06	1.71705e+06	1.282e+06	1.54909e+06	2.94857e+06	2.08579e+06	1.83269e+06	1.78353e+06	1.40422e+06	1.74905e+06	-	-	-
Zbjp003056	0.864679	3.19e-05	0.617211	0.0142339	Orientin-7-O-glucoside*	Flavonoids	Flavones	C27H30O16	611.16	449.11	610.153	[M+H]+	1	-	-	874524	871586	897485	423266	311184	335821	2.49102e+06	2.0541e+06	2.12827e+06	1.87037e+06	1.61636e+06	1.91441e+06	3.92798e+06	3.3897e+06	1.79789e+06	2.00019e+06	2.10062e+06	2.26736e+06	-	-	-
Zbkp000668	-0.967333	3.99e-09	-0.719495	0.00249623	2'-Deoxymugineic acid	Alkaloids	Alkaloids	C12H20N2O7	305.13	186.08	304.127	[M+H]+	3	74235-24-8	C15485	2.82207e+06	2.74883e+06	2.26291e+06	2.71021e+06	2.67413e+06	2.79256e+06	1.7395e+06	1.6541e+06	1.47026e+06	1.77181e+06	1.8139e+06	1.58394e+06	639208	519018	591860	1.92793e+06	1.93171e+06	1.83506e+06	ko00999,ko01100,ko01110	C15485	-
Zbkp001117	0.91162	2.25e-06	0.814555	0.00021746	Bakankoside	Terpenoids	Ditepenoids	C16H23NO8	358.15	196.1	357.142	[M+H]+	3	1398-17-0	C09914	11920	11920	59600.1	11920	11920	11920	217224	224680	185040	183585	220245	273286	335202	323942	336472	219365	198281	134860	-	C09914	-
Zbkp006473	-0.937023	2.64e-07	-0.768419	0.000817582	Cannabisin G	Alkaloids	Alkaloids	C36H36N2O8	625.25	488.17	624.247	[M+H]+	1	-	C17911	1.98403e+07	2.27874e+07	1.92789e+07	1.81203e+07	1.84742e+07	1.82694e+07	9.35052e+06	1.13275e+07	9.82163e+06	1.06284e+07	1.34122e+07	1.2504e+07	3.54063e+06	4.25599e+06	3.65469e+06	1.43887e+07	1.46223e+07	1.51832e+07	-	C17911	-
Zbkp006565	-0.944817	1.14e-07	-0.738472	0.00166537	Cannabisin E	Alkaloids	Alkaloids	C36H38N2O9	643.26	462.19	642.258	[M+H]+	1	-	C17909	3.24025e+06	4.04194e+06	3.58671e+06	3.26205e+06	3.1664e+06	2.84196e+06	1.73648e+06	2.00921e+06	1.8407e+06	2.18168e+06	2.45684e+06	2.17147e+06	646934	635972	558175	2.45916e+06	2.40384e+06	2.20112e+06	-	C17909	-
Zbln007322	-0.879488	1.56e-05	-0.825761	0.000149246	4-methoxyphenanthrene-2,3,7-triol	Quinones	PhenAnthraquinones	C15H12O4	255.06	184.06	256.074	[M-H]-	2	-	-	25872.6	35627.5	39649.2	27526.1	26754.3	35569.8	18496.8	26304.4	21511.1	11448	16899.7	10272.2	2054.43	2054.43	2054.43	20290.7	20737.8	22621.9	-	CM02175	MetMap162
Zbln007356	-0.891624	8.05e-06	-0.79142	0.00043984	retusiusine E	Quinones	PhenAnthraquinones	C15H12O5	271.06	241.05	272.068	[M-H]-	3	-	-	34781.6	33921.8	31157.6	22708.8	22210.8	23803.1	18399.4	13807.8	12703.1	17390.7	18097.7	16932.3	1849.82	3907.86	4868.01	24069.7	13257	23544.2	-	-	-
Zblp004717	0.945704	1.03e-07	0.648083	0.00897875	3'-methoxyquercetin-3-O-L-rhamnosyl(1鈫2)-glucopyranoside*	Flavonoids	Flavonols	C28H32O16	625.17	317.07	624.169	[M+H]+	1	-	-	8.09258e+06	8.21831e+06	1.0692e+07	8.17377e+06	1.42888e+07	1.17692e+07	2.02686e+07	1.91383e+07	2.10317e+07	1.56678e+07	1.45545e+07	1.56861e+07	2.56259e+07	2.93619e+07	2.7485e+07	1.76934e+07	1.19962e+07	2.11152e+07	-	CM00608	MetMap115,MetMap116
Zblp004882	0.809793	0.000253296	0.741149	0.00156873	4'-Hydroxy-3,5-dimethoxydihydrochalcone	Flavonoids	Chalcones	C17H18O4	287.14	121.03	286.12	[M+H]+	3	-	-	55887.8	89479.9	32580.1	31763	63778	44562.4	49472.9	106013	93343.8	168137	127877	155958	229958	146124	220456	98147	94509.1	102135	-	-	-
Zblp007216	-0.851701	5.59e-05	-0.787037	0.000497793	3,4-Dihydroxy-5,4'-dimethoxybibenzyl*	Others	Stilbene	C16H18O4	275.13	137.06	274.12	[M+H]+	3	-	-	122194	151091	125757	107204	122540	151766	95767.4	129423	104523	59591.1	86151.7	63029.9	33043.7	34482	35913.3	113693	91980	87619	-	-	-
ZBN0040	0.937288	2.57e-07	0.718597	0.00254251	Isorhamnetin-3-O-neohesperidoside*	Flavonoids	Flavonols	C28H32O16	623.17	315.05	624.169	[M-H]-	1	55033-90-4	-	2.71911e+07	2.64814e+07	2.80558e+07	2.62325e+07	2.51559e+07	3.11561e+07	4.33088e+07	4.06157e+07	5.14894e+07	4.06737e+07	3.82719e+07	4.38628e+07	5.28376e+07	6.02384e+07	5.59122e+07	4.66845e+07	3.6354e+07	5.16316e+07	-	-	-
ZBN0080	0.872491	2.21e-05	0.79099	0.000445262	Kaempferol-3-O-glucoside-7-O-rhamnoside*	Flavonoids	Flavonols	C27H30O15	593.15	285.04	594.159	[M-H]-	1	2392-95-2	-	816588	945146	1.34319e+06	1.06505e+06	1.07879e+06	1.33514e+06	1.80931e+06	1.40149e+06	1.93313e+06	1.86237e+06	1.63245e+06	2.06168e+06	2.44887e+06	2.16247e+06	2.51526e+06	1.90799e+06	1.79481e+06	1.83053e+06	-	-	-
ZBN0082	0.972364	1.36e-09	0.644306	0.00952401	Quercetin-3-O-glucoside-7-O-rhamnoside*	Flavonoids	Flavonols	C27H30O16	609.15	301.04	610.153	[M-H]-	1	-	-	365147	457459	230480	163284	247057	231193	1.04254e+06	810170	940116	540063	910884	987403	1.92026e+06	1.75419e+06	1.63323e+06	927616	835699	915616	-	-	-
ZBN0089	0.847855	6.54e-05	0.727206	0.00212592	Quercetin-3-O-sophoroside-7-O-rhamnoside	Flavonoids	Flavonols	C33H40O21	771.2	301.04	772.206	[M-H]-	2	-	-	16011	10972.3	2194.47	11738.5	11001.5	15808.5	109886	79295.3	106006	60829.4	74789.8	70295.2	105626	127507	88316.6	59782.9	47578	47390.4	-	-	-
ZBN0123	0.821656	0.000171818	0.678668	0.00540742	Quercetin-3-O-(6''-O-p-Coumaroyl)galactoside	Flavonoids	Flavonols	C30H26O14	609.12	301.04	610.132	[M-H]-	2	-	-	3624.49	7248.54	4716.45	16549.6	20777.8	15176.2	11645.3	14256	18719.4	36435.4	39498.7	32439.2	63725.7	94808.9	38896.3	26159.5	24037.1	34150.2	-	-	-
ZBN0134	0.928233	6.05e-07	0.72711	0.00213023	Gossypetin-3-O-rutinoside	Flavonoids	Flavonols	C27H30O17	625.14	316.02	626.148	[M-H]-	3	-	-	697347	717149	920832	961618	889496	799944	1.51317e+06	1.57765e+06	1.30533e+06	1.23559e+06	1.19262e+06	1.38196e+06	1.69749e+06	1.90072e+06	1.84893e+06	1.44465e+06	1.3484e+06	1.34889e+06	-	-	-
ZBN0154	0.911035	2.34e-06	0.686875	0.00467352	Quercetin-3-O-gentiotetroside	Flavonoids	Flavonols	C39H50O27	949.25	787.18	950.254	[M-H]-	3	-	-	9334.66	11517.8	6697.45	1339.49	1339.49	1339.49	54661.9	43585.4	39746	42189.8	34506.1	25870.3	67604.4	64485	54185.2	31072.4	18876.9	32359.4	-	-	-
ZBN0183	0.812264	0.000234136	0.758393	0.0010489	Chrysoeriol-7-O-gentiobioside	Flavonoids	Flavones	C28H32O16	623.16	299.06	624.169	[M-H]-	2	-	-	337904	269893	224279	235574	314898	287176	398905	421896	549482	433875	408501	502526	575720	504486	487310	488216	346641	402573	-	-	-
ZBN0188	0.95039	5.79e-08	0.683148	0.00499629	Quercetin-3,7-Di-O-glucoside*	Flavonoids	Flavonols	C27H30O17	625.14	463.09	626.148	[M-H]-	1	6892-74-6	-	8.59628e+06	8.66669e+06	8.49267e+06	2.6618e+06	2.94957e+06	2.69057e+06	2.10199e+07	2.20543e+07	2.02421e+07	1.70548e+07	1.97195e+07	1.90365e+07	2.73838e+07	3.40439e+07	3.20683e+07	1.74102e+07	1.67034e+07	1.7708e+07	-	-	-
ZBN0303	0.827079	0.000142537	0.617266	0.0142228	Kaempferol-3-O-(2''-O-acetyl)glucoside*	Flavonoids	Flavonols	C23H22O12	489.1	285.04	490.111	[M-H]-	3	-	-	49617.8	38952.1	43983.3	19059.2	18264.6	22874.5	50228.1	68079.3	92775.3	86985.3	79157.8	47252.1	114904	83748.6	103115	86964	72936.5	68122.4	-	-	-
ZBN0376	0.930677	4.86e-07	0.762512	0.000948196	Myricetindiglucoside	Flavonoids	Flavonols	C27H30O18	641.14	479.09	642.143	[M-H]-	2	-	-	196832	143599	165092	123126	102913	142490	893671	727740	1.00875e+06	830642	693634	757761	1.14318e+06	1.34999e+06	1.21886e+06	671248	733948	691953	-	-	-
ZBN0406	0.915266	1.72e-06	0.76087	0.000987338	Kaempferol triglucoside	Flavonoids	Flavonols	C33H40O21	771.2	609.15	772.206	[M-H]-	1	-	-	262827	296480	343933	177628	159241	165000	1.63066e+06	1.0333e+06	1.46341e+06	1.10493e+06	1.27115e+06	1.30935e+06	1.8411e+06	2.03756e+06	1.83552e+06	1.08711e+06	1.08174e+06	1.20475e+06	-	-	-
ZBN0428	0.947651	8.16e-08	0.69075	0.00435568	6-Hydroxykaempferol-3,6-O-diglucoside*	Flavonoids	Flavonols	C27H30O17	625.14	463.09	626.148	[M-H]-	1	142674-16-6	-	8.61383e+06	9.17634e+06	8.90364e+06	2.44046e+06	3.31969e+06	3.55458e+06	2.12228e+07	2.43265e+07	1.9114e+07	1.84031e+07	1.9045e+07	2.16639e+07	2.82035e+07	3.46468e+07	3.47673e+07	2.13614e+07	1.33353e+07	2.11047e+07	-	-	-
ZBN0430	0.942842	1.43e-07	0.714575	0.00275834	6-Hydroxykaempferol-3,6,7-O-triglucoside	Flavonoids	Flavonols	C33H40O22	787.19	625.13	788.201	[M-H]-	1	-	-	339665	434174	331257	210860	193770	235435	1.50169e+06	1.44861e+06	1.4535e+06	1.2147e+06	1.13031e+06	1.23859e+06	1.73577e+06	2.48874e+06	1.99082e+06	1.28037e+06	1.09248e+06	1.08175e+06	-	-	-
Zbpn004570	0.806021	0.000284994	0.77445	0.000699668	Phloretin-2'-O-(6''-O-rhamnoside)glucoside	Flavonoids	Chalcones	C27H34O14	581.19	273.08	582.195	[M-H]-	3	-	-	74873.4	81857.3	67858.9	67162.4	69517.5	64807.4	148193	163839	185181	148548	149986	150753	190423	174006	152774	161240	123755	156761	-	-	-
Zbpp001992	0.899213	5.12e-06	0.664238	0.00691615	Isorhamnetin 3-O-glucoside*	Flavonoids	Flavonols	C22H22O12	479.12	317.07	478.111	[M+H]+	1	5041-82-7	C22589	8.01562e+06	5.1339e+06	8.1329e+06	5.75215e+06	1.11416e+07	8.54397e+06	1.72922e+07	1.81356e+07	1.85058e+07	1.71031e+07	1.49842e+07	1.67151e+07	2.3549e+07	2.52041e+07	3.9978e+07	2.06712e+07	1.78175e+07	1.73671e+07	-	C22589	MetMap109
Zbqn003748	0.854168	5.05e-05	0.600699	0.0178812	N-malonylleucine	Amino acids and derivatives	Amino acids and derivatives	C9H15NO5	216.09	130.09	217.095	[M-H]-	1	-	-	105305	118876	108277	122545	129703	126524	111203	130324	119391	134842	163281	126134	170152	219631	200540	136875	133967	143758	-	-	-
Zbqn004177	0.962989	8.89e-09	0.695112	0.00401869	N-(sulfonyl)phenylalanine	Amino acids and derivatives	Amino acids and derivatives	C9H11NO5S	244.03	164.07	245.036	[M-H]-	3	-	-	23939.1	19574.3	23215.8	21644.1	26571.6	26158.8	61997.7	50779.2	68358.6	48580.9	57548.1	51776.8	107247	89825	106826	55116.6	40027.1	45402.6	-	-	-
Zbqp001937	0.952617	4.32e-08	0.650476	0.00864621	2,6-diamino-7-methyl-5-oxooctanoic acid	Amino acids and derivatives	Amino acids and derivatives	C9H18N2O3	203.14	130.05	202.132	[M+H]+	3	-	-	393007	331603	294274	493645	534542	678259	806000	690567	703635	601820	784439	728166	1.359e+06	1.56608e+06	1.48186e+06	849377	733282	768641	-	-	-
Zbsp003857	0.959274	1.64e-08	0.614906	0.0147051	3'-O-Methyltricetin-5-O-glucoside*	Flavonoids	Flavones	C22H22O12	479.12	317.06	478.111	[M+H]+	1	-	-	2.67991e+06	2.61921e+06	2.39597e+06	1.98325e+06	1.40029e+06	1.12089e+06	4.88404e+06	6.49687e+06	5.88754e+06	4.04201e+06	5.01632e+06	4.04123e+06	8.24835e+06	8.31022e+06	9.04096e+06	2.88458e+06	5.65735e+06	5.36728e+06	-	-	-
Zbsp004450	0.854984	4.87e-05	0.75291	0.00119618	3'-O-Methyltricetin-7-O-glucoside*	Flavonoids	Flavones	C22H22O12	479.12	317.07	478.111	[M+H]+	1	-	-	6.29207e+06	4.77353e+06	5.975e+06	5.28816e+06	1.19253e+07	8.56208e+06	1.88274e+07	1.34874e+07	1.20742e+07	1.17733e+07	1.29913e+07	1.48428e+07	1.83891e+07	1.97888e+07	1.81389e+07	1.34222e+07	8.99158e+06	1.57035e+07	-	-	-
Zbsp004650	0.869799	2.51e-05	0.653374	0.00825637	Tricin-5-O-Glucoside	Flavonoids	Flavones	C23H24O12	493.13	331.08	492.127	[M+H]+	3	32769-00-9	-	654433	494898	275799	790501	800478	783343	1.60581e+06	1.43093e+06	1.02784e+06	1.10042e+06	1.20546e+06	726547	2.04259e+06	1.65764e+06	1.80561e+06	1.19408e+06	1.37981e+06	1.02558e+06	-	-	-
Zbzp003056	0.906174	3.27e-06	0.702075	0.003524	Isoorientin-7-O-glucoside*	Flavonoids	Flavones	C27H30O16	611.17	449.11	610.153	[M+H]+	1	-	-	1.10211e+06	898580	1.25759e+06	558483	416056	527234	2.84875e+06	2.60551e+06	2.81921e+06	3.00942e+06	2.13363e+06	2.44101e+06	4.81681e+06	3.54378e+06	3.60656e+06	3.31397e+06	2.39864e+06	2.97137e+06	-	-	-
Zjbn102210	0.958588	1.83e-08	0.691345	0.00430845	Gymnoside I	Others	Others	C21H30O11	457.17	127.08	458.179	[M-H]-	1	-	-	902385	1.07506e+06	937347	1.15203e+06	1.40658e+06	1.23165e+06	1.57522e+06	1.70342e+06	1.73596e+06	1.70731e+06	1.98835e+06	1.83725e+06	3.56129e+06	3.37065e+06	2.97726e+06	2.045e+06	1.69531e+06	2.04735e+06	-	-	-
Zmdp001857	0.857906	4.3e-05	0.827674	0.000139594	γ-Glu-Tyr	Amino acids and derivatives	Amino acids and derivatives	C14H18N2O6	311.12	165.05	310.116	[M+H]+	3	7432-23-7	-	3280.52	3280.52	3280.52	19975.5	20770.3	16402.6	55013.1	74214.9	54393.9	55583.3	47058.7	51095.7	74483.7	77927.6	70538.9	31560.7	72012.6	47328.1	-	-	-
Zmfn007930	-0.884108	1.22e-05	-0.773187	0.000723133	aloifol I	Others	Stilbene	C16H18O4	273.11	121.03	274.12	[M-H]-	1	-	-	53773.2	53542.5	57990.8	37372.9	60132.7	64473.5	42225.4	43330.4	40445.4	26836.7	34399.7	29114.2	17044.8	11440.3	10991.5	40170.2	43783.1	42098.3	-	CM02283	MetMap150,MetMap152
Zmhn001703	0.84054	8.71e-05	0.8619	3.61e-05	5-O-Galloyl-D-hamamelose*	Phenolic acids	Phenolic acids	C13H16O10	331.07	169.02	332.074	[M-H]-	2	90275-97-1	-	276317	230547	285404	343381	336489	375173	900913	753039	750515	663182	879356	892612	882207	1.04881e+06	940495	808500	739377	751383	-	-	-
Zmhn002032	0.938381	2.3e-07	0.685679	0.0047753	4-O-(6'-O-Glucosylcaffeoylglucosyl)-4-hydroxybenzyl alcohol	Phenolic acids	Phenolic acids	C28H34O15	609.18	447.13	610.19	[M-H]-	2	-	-	227029	223393	329224	230339	147148	151869	787172	755132	1.14531e+06	771875	750612	694733	1.6392e+06	1.27824e+06	1.36007e+06	703861	769541	727746	-	-	-
Zmhn003098	0.859613	3.99e-05	0.649493	0.00878161	4-O-(6'-O-Glucosylcaffeoylglucosylferuloyl)-4-hydroxybenzyl alcohol	Phenolic acids	Phenolic acids	C38H42O18	785.23	447.13	786.237	[M-H]-	3	-	-	19997.3	19250.4	15794.6	7059.56	4126.84	10474.9	53606.7	59047.1	52587	37164	37927.6	45512.2	76548.9	54332.8	59509.7	58543.4	47279.5	60488.6	-	-	-
Zmhp003607	0.894549	6.79e-06	0.603563	0.0172022	Sachaloside IV*	Flavonoids	Flavonols	C33H40O21	773.21	303.05	772.206	[M+H]+	1	1001645-54-0	-	923694	946137	931602	638677	1.3853e+06	1.20572e+06	6.80399e+06	4.80226e+06	5.35481e+06	3.95077e+06	2.01179e+06	3.17037e+06	5.65152e+06	7.6031e+06	7.95043e+06	4.14105e+06	1.87237e+06	4.84574e+06	-	-	-
Zmhp005139	0.939608	2.03e-07	0.604902	0.0168915	Tamarixetin-3-O-(6''-malonyl)glucoside*	Flavonoids	Flavonols	C25H24O15	565.12	317.07	564.111	[M+H]+	1	-	-	533282	634362	419314	203638	281547	159915	1.00825e+06	1.03501e+06	948319	836299	756446	822542	1.33865e+06	1.40798e+06	1.33784e+06	905566	839870	830916	-	-	-
Zmhp005586	0.817526	0.000197289	0.751288	0.00124283	Herbacetin-7-O-(3''-glucosyl)rhamnoside; Rhodiosin	Flavonoids	Flavonols	C27H30O16	611.16	303.05	610.153	[M+H]+	2	86831-54-1	-	7242.94	7242.94	7242.94	7242.94	7242.94	7242.94	7242.94	7242.94	7242.94	44256.5	65190.1	79075.1	102403	85458.2	93594.9	49822.9	48867.5	36214.7	-	-	-
Zmln000668	0.986733	1.2e-11	0.642686	0.00976566	Monogalloyl-diglucose	Phenolic acids	Phenolic acids	C19H26O15	493.12	169.01	494.127	[M-H]-	3	-	-	19036.1	18057.4	9703.18	1940.64	1940.64	1940.64	31151.6	41724.7	40741.5	40974.1	41638.3	45329.2	93112.7	103955	105909	50473.2	54319.1	47808.5	-	-	-
Zmmp003482	0.952868	4.17e-08	0.601909	0.0175919	Petunidin-3-O-(6''-O-p-coumaroyl)rutinoside-7-O-glucoside*	Flavonoids	Anthocyanidins	C43H49O23+	933.27	317.07	933.266	[M]+	3	-	-	69288.1	46318	89524.4	42611.4	180507	123776	395952	295503	383623	177595	235388	226782	526176	615876	669843	300713	184546	281179	-	-	-
Zmsn004709	0.912009	2.19e-06	0.695523	0.00398807	1,4-bis[(4-{[3,4,5-trihydroxy-6-(hydroxymethyl)oxan-2-yl]oxy}phenyl)methyl]3-hydroxy-2-(2-methylpropyl)-2-{[3,4,5-trihydroxy-6-(hydroxymethyl)oxan-2-yl]oxy}butanedioate	Quinones	PhenAnthraquinones	C40H56O23	903.32	473.17	904.321	[M-H]-	1	-	-	351667	287913	342206	437526	462283	449055	593662	633161	735243	515549	544642	547120	834153	784505	887439	585941	513965	605292	-	-	-
Zmsp000546	0.934307	3.45e-07	0.629266	0.0119565	((3S,7AR)-hexahydro-1H-pyrrolizin-3-yl)methanol*	Alkaloids	Pyrrole alkaloids	C8H15NO	142.12	96.08	142.124	[M+H]+	3	-	-	230322	303922	317230	425779	414854	359216	499084	497135	611205	478277	385766	553787	766351	912157	980612	491483	409865	505539	-	-	-
Zmsp003339	0.887971	9.89e-06	0.612693	0.0151687	Rhamnocitrin-4'-O-glucoside-3-O-glucosyl(1→4)glucoside	Flavonoids	Flavonols	C34H42O21	787.23	317.07	786.222	[M+H]+	1	-	-	101209	84666.8	45005.5	47653.3	35519.7	20806.5	156911	186524	187876	120512	144446	136820	195222	254025	188614	94684.8	211949	130276	-	-	-
Zmsp006004	0.885624	1.13e-05	0.794727	0.000399847	Ombuin-3-O-rutinoside	Flavonoids	Flavonols	C29H34O16	639.18	331.08	638.185	[M+H]+	1	-	-	3.16596e+06	2.63997e+06	2.53177e+06	4.99545e+06	4.61089e+06	4.96896e+06	1.0356e+07	1.17501e+07	1.10851e+07	8.49264e+06	9.59603e+06	8.91714e+06	1.19159e+07	1.38803e+07	1.35636e+07	8.976e+06	9.30023e+06	9.02208e+06	-	-	-
Zmtn001464	0.966605	4.6e-09	0.751743	0.0012296	Xanthurenic acid	Alkaloids	Quinoline alkaloids	C10H7NO4	204.03	160.04	205.037	[M-H]-	3	59-00-7	C02470	98449.5	87172.3	95269	123282	109934	104805	179282	168102	172118	146234	180294	187416	243396	282381	259203	195774	172417	159883	ko00380	C02470	-
Zmyn014236	0.80884	0.000261014	0.621184	0.0134491	2-Dodecoxyethyl Hydrogen Sulfate	Others	Others	C14H30O5S	309.17	96.96	310.181	[M-H]-	2	48073-44-5	-	1.47991e+06	1.17485e+06	1.68226e+06	1.85692e+06	1.51585e+06	982197	924550	1.21204e+06	993006	2.5183e+06	3.38789e+06	9.03599e+06	9.47627e+06	9.40586e+06	8.78746e+06	2.53288e+06	3.21999e+06	2.90032e+06	-	-	-
Zmyp00416	-0.979229	2.16e-10	-0.657461	0.00773024	(4S,5S,6R)-2-(((1S,7aR)-hexahydro-1H-pyrrolizin-1-yl)methoxy)-6-(hydroxymethyl)tetrahydro-2H-pyran-3,4,5-triol	Alkaloids	Pyrrole alkaloids	C14H25NO6	304.17	142.12	303.168	[M+H]+	3	-	-	1.81097e+06	1.66916e+06	1.768e+06	1.80208e+06	1.78124e+06	1.80722e+06	1.15448e+06	1.22349e+06	1.23508e+06	1.47749e+06	1.39235e+06	1.34668e+06	712972	721341	736213	1.5396e+06	1.4288e+06	1.41289e+06	-	-	-
Zmzp004111	0.898238	5.43e-06	0.662372	0.0071333	3'-O-Methyltricetin*	Flavonoids	Flavones	C16H12O7	317.06	302.04	316.058	[M+H]+	1	-	C19739	1.67911e+07	2.02959e+07	8.98038e+06	1.39828e+07	1.58799e+07	1.27016e+07	2.22165e+07	2.1438e+07	2.90209e+07	2.37495e+07	2.05514e+07	2.81598e+07	4.16491e+07	3.22553e+07	3.48694e+07	1.64509e+07	2.88689e+07	1.88363e+07	-	C19739	-

## Sheet: Pureple
Index	MM	MM.p	GS	GS.p	Compounds	Class I	Class II	Formula	Q1 (Da)	Q3 (Da)	Molecular weight (Da)	Ionization model	Level	CAS	cpd_ID	120DAI_1	120DAI_2	120DAI_3	180DAI_1	180DAI_2	180DAI_3	240DAI_1	240DAI_2	240DAI_3	300DAI_1	300DAI_2	300DAI_3	360DAI_1	360DAI_2	360DAI_3	QC01	QC02	QC03	kegg_map	mw_cpd_ID	mw_map
Hasp010605	0.954604	3.28e-08	-0.702133	0.00352015	MG(18:3(9Z,12Z,15Z)/0:0/0:0)*	Lipids	Glycerol ester	C21H36O4	353.27	261.22	352.261	[M+H]+	1	129828-41-7	-	1.86465e+06	1.65451e+06	1.351e+06	690099	771903	608939	1.52051e+06	1.35608e+06	1.48938e+06	428506	469553	433188	751245	803124	918763	1.27748e+06	1.1641e+06	1.22198e+06	-	-	-
Lmhp008513	0.857988	4.29e-05	-0.672652	0.00600099	2-α-Linolenoyl-glycerol-1,3-di-O-glucoside*	Lipids	Glycerol ester	C33H56O14	677.37	261.22	676.367	[M+H]+	1	-	-	22095.8	41146.8	20412.9	14831.2	14817.1	7690.74	21839.2	24754.6	19363.9	1538.15	1538.15	1538.15	13247.7	22148.4	14935.5	28006.8	18706.1	29942.9	-	-	-
Lskp211423	0.809088	0.000258986	-0.616395	0.0143994	Intergristerone A-22-O-galactoside (Sileneoside C)	Steroids	Steroidal saponins	C33H54O13	659.36	335.26	658.356	[M+H]+	2	83207-65-2	-	48948.7	94301.3	43929.5	55888.4	32972.1	32105.3	46558.7	82440.8	74257.6	5980.1	5980.1	5980.1	48031.6	31902.4	29900.5	41719.2	75387.8	91271.8	-	-	-
PDP193819	0.949752	6.28e-08	-0.696975	0.00388129	methyl 9-hydroxy-1-(5-hydroxy-6-methylheptan-2-yl)-4-methylspiro[4.5]dec-7-ene-8-carboxylate	Terpenoids	Sesquiterpenoids	C21H36O4	353.27	261.22	352.261	[M+H]+	2	-	-	2.00763e+06	1.76925e+06	1.62973e+06	732258	839291	673532	1.84674e+06	1.47383e+06	1.54826e+06	491001	555413	513950	876831	968134	822281	1.37963e+06	1.14374e+06	1.24781e+06	-	-	-
PDP239506	0.969456	2.59e-09	-0.63279	0.0113476	Phosphatidylcholine lyso 18:1*	Lipids	LPC	C26H52NO7P	522.36	184.07	521.348	[M+H]+	1	-	-	1.08659e+07	1.19098e+07	1.04916e+07	6.71894e+06	6.05829e+06	5.88881e+06	8.83593e+06	1.10317e+07	9.50946e+06	5.0931e+06	4.89867e+06	5.02588e+06	7.96145e+06	9.10877e+06	8.22978e+06	9.55319e+06	9.65238e+06	9.73269e+06	-	-	-
PDP240682	-0.839553	9.04e-05	0.787304	0.000494096	Levofolinic acid*	Alkaloids	Alkaloids	C20H23N7O7	474.18	327.12	473.166	[M+H]+	1	-	-	1.29174e+06	1.47397e+06	1.08688e+06	1.48749e+06	1.79167e+06	1.90463e+06	1.41841e+06	1.41611e+06	1.41434e+06	2.07982e+06	2.05694e+06	2.17835e+06	1.75695e+06	1.77999e+06	1.97907e+06	1.51994e+06	1.40727e+06	1.74195e+06	-	-	-
Qmxp101530	-0.941739	1.61e-07	0.664624	0.00687186	Inflexarabdonin J	Terpenoids	Ditepenoids	C20H30O3	319.23	255.21	318.219	[M+H]+	3	-	-	714390	765513	714117	1.03303e+06	1.01435e+06	1.05948e+06	804040	786844	883068	1.16525e+06	1.11984e+06	1.19454e+06	850043	913526	921134	821175	940939	965461	-	-	-
Safn011471	0.955698	2.81e-08	-0.623043	0.0130936	2-hydroxy-3-{[3,4,5-trihydroxy-6-(hydroxymethyl)oxan-2-yl]oxy}propyl octadeca-9,12,15-trienoate	Lipids	Free fatty acids	C27H46O9	573.33	277.22	514.314	[M+CH3COOH-H]-	1	-	-	3.55377e+06	2.64182e+06	2.57476e+06	1.37982e+06	1.12961e+06	1.16956e+06	3.00978e+06	2.96185e+06	2.63252e+06	974929	912779	991991	1.32968e+06	1.78695e+06	1.46644e+06	2.67482e+06	2.39103e+06	2.13775e+06	-	-	-
Safp021800	0.965246	5.94e-09	-0.686171	0.00473325	LPC(18:1/0:0)	Lipids	LPC	C26H53NO7P+	522.35	184.08	522.356	[M]+	1	3542-29-8	-	1.11946e+07	1.14163e+07	1.07204e+07	6.42613e+06	6.34104e+06	6.27855e+06	8.54877e+06	1.06716e+07	9.45069e+06	4.85099e+06	5.00068e+06	4.54226e+06	7.704e+06	8.83592e+06	8.05548e+06	9.6682e+06	1.0084e+07	9.88777e+06	-	-	-
Safp023654	-0.926819	6.84e-07	0.663155	0.00704149	PAz-PC	Lipids	LPC	C33H64NO10P	666.43	184.07	665.427	[M+H]+	1	117205-52-4	-	2.11493e+06	2.06495e+06	1.65182e+06	2.97928e+06	3.10166e+06	3.12643e+06	2.14526e+06	2.18255e+06	2.13072e+06	3.12866e+06	3.47494e+06	3.29404e+06	2.79939e+06	2.90477e+06	2.58803e+06	2.42896e+06	2.34414e+06	2.65812e+06	-	-	-
Walbn08698	0.962994	8.88e-09	-0.727191	0.0021266	3-(((2-(dimethylamino)ethoxy)(hydroxy)phosphoryl)oxy)-2-hydroxypropyl oleate*	Lipids	LPE	C25H50NO7P	506.32	281.25	507.332	[M-H]-	1	-	-	226821	224855	199479	125154	101556	107519	185165	183302	179281	81049.9	86850	74133.5	120511	155994	137141	162583	177357	167959	-	-	-
Waln011704	0.96746	3.89e-09	-0.665655	0.00675477	1-(2,3-dihydroxypropoxy)-3-(((2-(dimethylamino)ethoxy)(hydroxy)phosphoryl)oxy)propan-2-yl (Z)-14-Octadecenoic Acid	Lipids	LPE	C28H56NO9P	580.36	281.25	581.369	[M-H]-	1	-	-	280458	241410	237097	134756	144570	126384	213839	221627	223047	102250	105934	114726	175598	196277	170317	196321	208863	219315	-	-	-
WapTKC012013	0.804126	0.000302098	-0.808299	0.000265486	Eperuol*	Terpenoids	Ditepenoids	C18H30O	263.24	81.07	262.23	[M+H]+	1	87553-46-6	-	853404	663840	649956	498832	669564	470974	696932	708281	631326	242003	266221	242280	307345	480422	419263	539539	569405	512601	-	-	-
Waqkp06484	0.90563	3.39e-06	-0.706532	0.0032337	1-Linolenoylglycerol*	Lipids	Glycerol ester	C21H36O4	353.27	261.22	352.261	[M+H]+	1	-	-	560450	588509	365015	205659	186205	181451	400485	322180	350835	112405	106926	119081	337972	278533	243113	426619	396165	418066	-	-	-
Waqkp07331	0.872586	2.2e-05	-0.79001	0.000457843	1-g-Linoleoyl-glycerol*	Lipids	Glycerol ester	C21H38O4	355.29	263.24	354.277	[M+H]+	1	-	-	716829	602400	516306	436455	432442	424505	621800	611617	597421	185705	197013	173049	322981	353819	298081	510163	477446	490182	-	-	-
Waqkp07598	0.874824	1.97e-05	-0.843574	7.75e-05	2-g-Linoleoyl-glycerol*	Lipids	Glycerol ester	C21H38O4	355.29	263.24	354.277	[M+H]+	1	-	-	729359	718962	599619	481679	431138	396306	654920	620331	555336	208527	213542	183557	280487	345647	332812	544051	568598	474129	-	-	-
WaYn011395	0.963666	7.9e-09	-0.727585	0.00210893	2-(2,3-dihydroxypropoxy)-3-(((2-(dimethylamino)ethoxy)(hydroxy)phosphoryl)oxy)propan-2-yl (Z)-14-Octadecenoic Acid	Lipids	LPE	C28H56NO9P	580.36	281.25	581.369	[M-H]-	1	-	-	264562	240043	239563	130324	130069	135070	194367	221928	198264	101879	105284	97576.9	162762	170467	165672	205542	226912	192097	-	-	-
Zbfn008434	0.899819	4.93e-06	-0.715191	0.00272433	1-O-Linoleoyl-3-O-galactopyranosyl-L-glycerol	Lipids	Glycerol ester	C27H48O9	515.32	279.23	516.33	[M-H]-	1	-	-	1.89359e+06	2.00994e+06	1.65379e+06	1.36134e+06	1.43468e+06	1.40278e+06	1.76816e+06	2.12793e+06	2.00883e+06	674831	744681	703944	1.34736e+06	1.2703e+06	1.2558e+06	1.70968e+06	1.674e+06	1.78537e+06	-	-	-
ZBN0265	-0.927988	6.18e-07	0.769244	0.000800548	Tricin-4'-O-syringylglyceryl ether-5-O-glucoside*	Flavonoids	Flavones	C34H38O17	717.2	329.07	718.211	[M-H]-	3	-	-	401003	416335	336228	785654	825637	842133	518010	565142	618467	983818	938508	967473	701857	748054	707929	749795	652368	806218	-	-	-
Zbsp010780	0.897889	5.55e-06	-0.668778	0.00640963	Methyl [6]-Gingerdiol 5-acetate	Phenolic acids	Phenolic acids	C20H32O5	353.23	151.08	352.225	[M+H]+	3	-	-	115499	92205.9	85977	37173.1	30169.8	42592.4	74161.8	96853.7	69872.3	38726.7	32002.9	40773.2	42430.6	35721.7	47542.4	84225.5	63015.5	73612.6	-	-	-
Zmyn002321	0.90778	2.93e-06	-0.715056	0.00273177	4-Cresol	Others	Others	C7H8O	107.05	106.04	108.058	[M-H]-	1	106-44-5	C01468	96542	98175.8	89151.1	63748.6	66991.4	47621.1	78426.7	113417	73101.2	48740.9	30976.4	34944.2	57398	56331.4	58744.4	68603.9	68965.5	67720.5	ko01100	C01468	MetMap163,MetMap164

## Sheet: Black
Index	MM	MM.p	GS	GS.p	Compounds	Class I	Class II	Formula	Q1 (Da)	Q3 (Da)	Molecular weight (Da)	Ionization model	Level	CAS	cpd_ID	120DAI_1	120DAI_2	120DAI_3	180DAI_1	180DAI_2	180DAI_3	240DAI_1	240DAI_2	240DAI_3	300DAI_1	300DAI_2	300DAI_3	360DAI_1	360DAI_2	360DAI_3	QC01	QC02	QC03	kegg_map	mw_cpd_ID	mw_map
Cmsp005585	0.852459	5.42e-05	-0.770316	0.000778878	Ephemeranthol A	Quinones	PhenAnthraquinones	C16H16O4	273.11	195.08	272.105	[M+H]+	3	135545-86-7	-	22648.8	22696.5	18403.9	19165.9	29135.1	23034	27369.1	25000.1	10856.2	2171.23	2171.23	2171.23	2171.23	2171.23	2171.23	26053.3	13844.5	27282.6	-	CM02198	MetMap162
Cmyp001700	-0.962128	1.03e-08	0.935066	3.21e-07	Hydrohydrastinine	Alkaloids	Isoquinoline alkaloids	C11H13NO2	192.1	177.08	191.095	[M+H]+	2	494-55-3	-	335669	340973	248366	411343	417701	541826	458759	459703	459347	828528	889858	820519	770923	784283	789400	642724	550883	495093	-	-	-
HJAP104	0.805373	0.000290748	-0.767882	0.000828816	Benzaldehyde	Others	Aldehyde compounds	C7H6O	107.05	77.04	106.042	[M+H]+	1	100-52-7	C00261	262019	266440	186237	106038	107037	115545	200418	158850	163881	112630	96015.9	82952.5	72770.9	98616.4	100969	117273	194958	110611	ko01100	C00261	MetMap164,MetMap172
Hmhn003518	0.949188	6.74e-08	-0.786142	0.000510358	4-O-β-D-glucopyranosylferulic acid	Phenolic acids	Phenolic acids	C16H20O9	355.1	175.04	356.111	[M-H]-	1	-	-	1.4121e+07	1.37874e+07	1.56612e+07	1.23656e+07	1.26297e+07	1.34472e+07	1.40633e+07	1.47911e+07	1.52212e+07	7.35266e+06	8.43212e+06	7.44809e+06	5.91596e+06	5.34167e+06	6.13727e+06	1.22328e+07	1.27068e+07	1.22275e+07	-	-	-
Hmhp005846	-0.887176	1.03e-05	0.88362	1.25e-05	Tenaxin I*	Flavonoids	Flavones	C18H16O7	345.09	330.07	344.09	[M+H]+	1	86926-52-5	-	8.77863e+06	8.12692e+06	7.23498e+06	1.30775e+07	1.62901e+07	1.1568e+07	1.24808e+07	1.29502e+07	1.31076e+07	1.65995e+07	1.59659e+07	1.53166e+07	1.71974e+07	1.62294e+07	1.5639e+07	1.71378e+07	1.33659e+07	1.77002e+07	-	-	-
Hmln000297	-0.918869	1.31e-06	0.789767	0.000461002	myo-Inositol*	Others	Saccharides	C6H12O6	179.05	59.01	180.063	[M-H]-	1	87-89-8	C00137	2.44071e+06	2.36087e+06	2.4514e+06	2.94227e+06	3.2027e+06	2.88772e+06	3.00459e+06	2.8786e+06	3.01215e+06	2.97813e+06	3.59226e+06	3.53299e+06	3.93122e+06	4.08872e+06	4.15594e+06	3.10241e+06	3.12057e+06	2.90008e+06	ko00052,ko00053,ko00562,ko01100,ko01110,ko01250,ko02010,ko04070	C00137	-
Hmln005329	0.956464	2.51e-08	-0.876663	1.8e-05	Ephemeranthoquinone B	Quinones	PhenAnthraquinones	C15H12O4	255.07	239.04	256.074	[M-H]-	1	-	-	2.82511e+06	3.23219e+06	3.24287e+06	2.17939e+06	2.46599e+06	2.79724e+06	1.90303e+06	2.06027e+06	1.95906e+06	1.03581e+06	1.31268e+06	1.09126e+06	226624	233281	225286	2.00374e+06	1.79666e+06	1.92265e+06	-	-	-
Hmqp005411	0.941501	1.65e-07	-0.926595	6.97e-07	9-Oxo-12Z-Octadecenoic acid*	Lipids	Free fatty acids	C18H32O3	297.24	81.07	296.235	[M+H]+	1	112543-32-5	-	469347	524385	419069	330188	357897	318131	357832	316340	345414	199779	214217	255540	217530	190672	203322	370726	276912	303910	-	-	-
Hmqp005455	0.957461	2.17e-08	-0.932697	4.03e-07	15(R)-Hydroxylinoleic Acid*	Lipids	Free fatty acids	C18H32O3	297.24	81.07	296.235	[M+H]+	1	177931-23-6	-	563347	589680	480688	420885	388514	383950	417229	411096	393273	219492	246156	282518	237450	222062	229754	371421	342887	373748	-	-	-
Lakn002075	-0.962589	9.52e-09	0.899266	5.1e-06	4-Hydroxybenzoic acid glucosyl xyloside*	Phenolic acids	Phenolic acids	C18H24O12	431.12	137.02	432.127	[M-H]-	2	-	-	457859	441043	360791	448551	480878	514079	510458	541678	572329	678308	694514	705100	729150	803369	710782	539204	610089	598257	-	CM02441	MetMap157
Laln002027	-0.962531	9.62e-09	0.904374	3.68e-06	3,4-dihydroxybenzaldehyde-xylose-glucoside	Others	Aldehyde compounds	C18H24O12	431.12	137.02	432.127	[M-H]-	2	-	-	581218	570525	499690	573368	634109	616247	670268	734900	696668	879085	905257	963549	936141	1.04017e+06	950422	775731	746665	798848	-	CM02854	MetMap164
Latp009318	0.879859	1.53e-05	-0.90133	4.48e-06	Virgaurenolide A	Terpenoids	Sesquiterpenoids	C20H22O5	343.15	163.07	342.146	[M+H]+	3	-	-	4.04391e+06	4.09158e+06	3.84684e+06	3.30345e+06	3.46883e+06	3.83238e+06	3.15307e+06	3.65274e+06	3.56386e+06	3.03727e+06	3.06774e+06	3.07499e+06	3.16863e+06	3.02712e+06	3.00085e+06	3.16147e+06	3.61051e+06	3.29269e+06	-	-	-
Lcfn121113	0.891103	8.29e-06	-0.831195	0.000123167	DL-Glycerol 1-phosphate	Organic acids	Organic acids	C3H9O6P	171.01	78.96	172.014	[M-H]-	2	1957-03-04	C03189	157811	189675	198011	184441	187985	187707	170481	149133	150807	117412	113857	117733	98554	119309	84069.7	160639	161383	180698	-	C03189	-
Lcfp056369	-0.903332	3.94e-06	0.888275	9.73e-06	Isopentenyladenine9-Glucoside	Nucleotides and derivatives	Nucleotides and derivatives	C16H23N5O5	366.18	204.12	365.17	[M+H]+	3	83087-94-9	-	269120	269664	161324	365123	232526	314934	245493	396473	369054	514863	510717	621937	512383	503994	505799	471709	433722	465366	-	-	-
Lcsn000415	-0.818165	0.000193158	0.826065	0.000147675	3-Deoxy-D-glycero-D-galacto-non-2-ulopyranosonate	Lipids	Free fatty acids	C9H16O9	267.07	59.01	268.079	[M-H]-	2	153666-19-4	C20934	62415.8	76706.9	58766.4	72737.6	96230.2	80726.8	107652	105650	86264.8	89698.8	131232	133515	116877	141723	106138	95388.1	106574	91024.8	ko00520,ko01100,ko01250	C20934	-
Lcsn004327	-0.96411	7.3e-09	0.887343	1.02e-05	(Indol-3-yl)acetyl-L-aspartate	Alkaloids	Plumerane	C14H14N2O5	289.08	88.04	290.09	[M-H]-	1	2456-73-7	C22224	1.727e+06	1.28699e+06	1.2231e+06	2.06492e+06	1.85881e+06	1.90582e+06	1.81179e+06	1.89198e+06	2.0103e+06	2.76466e+06	2.90873e+06	2.78621e+06	2.54479e+06	3.38771e+06	2.90131e+06	2.05313e+06	2.08004e+06	1.96115e+06	-	C22224	-
Lmap001606	0.952179	4.58e-08	-0.934082	3.53e-07	Helicidol*	Phenolic acids	Phenolic acids	C13H18O7	287.11	107.05	286.105	[M+H]+	1	106982-96-1	-	703222	619796	528574	379891	380603	356211	315126	328687	298820	136539	133488	125769	25153.8	25153.8	25153.8	353615	339369	375846	-	CM02856	MetMap164
Lmgp005640	-0.826072	0.000147641	0.713112	0.00284035	Isorhamnetin-3-O-Galactoside; Cacticin	Flavonoids	Flavonols	C22H22O12	479.12	317.07	478.111	[M+H]+	2	6743-92-6	-	291113	221373	230663	408599	440463	443043	392052	457227	311058	428868	426387	557891	660653	717718	455581	516719	395873	558082	-	CM00834	MetMap109
Lmqn003292	0.973679	9.95e-10	-0.872897	2.16e-05	4,5,8-Trihydroxy-α-tetralone-5-O-glucoside	Quinones	Naphthol	C16H20O9	355.1	193.05	356.111	[M-H]-	1	-	-	1.36872e+06	1.44029e+06	1.30743e+06	1.21733e+06	1.11992e+06	1.21042e+06	1.17922e+06	1.2374e+06	1.30144e+06	687759	722287	581088	533374	561181	592422	986281	922132	935592	-	-	-
Lmrj002793	-0.941986	1.57e-07	0.866434	2.94e-05	Cyclo(Phe-Glu)	Amino acids and derivatives	Amino acids and derivatives	C14H16N2O4	277.12	120.08	276.111	[M+H]+	3	-	-	29226.4	46576.3	32910.2	38403.4	63555.1	57932.7	91346.5	76021.9	74146.8	167150	204019	165282	233275	175719	230270	99409.7	91593.3	93190.5	-	-	-
Lmsp000796	0.94687	8.96e-08	-0.868548	2.66e-05	Pelletierine	Alkaloids	Piperidine alkaloids	C8H15NO	142.12	84.09	141.115	[M+H]+	3	4396-01-04	C06182	721832	587534	557277	312275	287448	315546	448560	381877	457169	159570	128319	163402	57313.6	44405	62656.8	264511	330683	285345	ko00960,ko01100,ko01110	C06182	-
Lmxn006423	-0.92321	9.27e-07	0.826528	0.000145313	2(3H)-Benzothiazolone	Alkaloids	Alkaloids	C7H5NOS	150	122.01	151.009	[M-H]-	1	934-34-9	-	14500.8	13132.7	13731	12672.6	14991.7	16630.8	15750.1	14129.2	14983.3	28463.7	39983.5	30557.4	31403.4	34319.7	34824.9	19482	20967.5	16008.2	-	-	-
MWS00204g	0.912672	2.08e-06	-0.910313	2.46e-06	N-Ethylglycine*	Amino acids and derivatives	Amino acids and derivatives	C4H9NO2	104.07	58.07	103.063	[M+H]+	3	627-01-0	C11735	9.27348e+06	8.80332e+06	7.65971e+06	6.78369e+06	6.56117e+06	6.98822e+06	7.02066e+06	7.15583e+06	6.56634e+06	3.75788e+06	5.49077e+06	5.27376e+06	5.11115e+06	4.9995e+06	4.50978e+06	7.1872e+06	8.15515e+06	7.0525e+06	-	C11735	-
MWS00327g	0.983527	4.84e-11	-0.89509	6.57e-06	L-Isoserine	Amino acids and derivatives	Amino acids and derivatives	C3H7NO3	106.05	60.04	105.043	[M+H]+	3	632-13-3	-	3.25161e+06	3.3408e+06	3.43296e+06	2.99678e+06	3.06545e+06	2.8161e+06	2.82596e+06	3.01982e+06	2.91905e+06	2.28532e+06	2.34274e+06	2.31904e+06	2.04006e+06	1.97371e+06	2.02278e+06	2.86792e+06	2.83731e+06	2.89764e+06	-	-	-
mws0704	0.87191	2.27e-05	-0.886017	1.1e-05	Ethanolamine phosphate	Alkaloids	Alkaloids	C2H8NO4P	140.01	78.96	141.019	[M-H]-	3	1071-23-4	C00346	61029.2	56350.9	56640.7	40641.7	44224.2	44006.4	52543.4	40920.6	49335.1	33741.7	34462.3	34945	40608.1	37079.2	35748.9	46819.4	46966.2	48816.9	ko00563,ko00564,ko00600,ko01100	C00346	-
mws1164	-0.918858	1.31e-06	0.90042	4.75e-06	D-Fructose*	Others	Saccharides	C6H12O6	179.06	59.01	180.063	[M-H]-	1	57-48-7	C05003	2.42952e+06	2.45071e+06	2.17568e+06	2.89037e+06	2.968e+06	3.13507e+06	3.15975e+06	2.94628e+06	3.16154e+06	3.18669e+06	3.40198e+06	3.46519e+06	3.55085e+06	3.69936e+06	3.56078e+06	2.94789e+06	3.15843e+06	2.9348e+06	-	C05003	-
mws1383	0.900147	4.83e-06	-0.873347	2.12e-05	Lumichrome	Alkaloids	Alkaloids	C12H10N4O2	243.09	145.08	242.08	[M+H]+	3	1086-80-2	C01727	606694	777670	613120	468845	559315	485102	393992	472762	514291	437764	337744	277758	272273	267082	279480	355530	417411	399043	ko00740	C01727	-
mws4170	-0.901496	4.43e-06	0.902722	4.1e-06	D-Glucose*	Others	Saccharides	C6H12O6	179.06	59.01	180.063	[M-H]-	1	50-99-7	C00031	2.36128e+06	2.36482e+06	2.87996e+06	3.12128e+06	3.08154e+06	3.10605e+06	3.24571e+06	3.08967e+06	3.47256e+06	3.43216e+06	3.86918e+06	3.6931e+06	3.61687e+06	4.01806e+06	3.82991e+06	3.00948e+06	2.93646e+06	3.33452e+06	ko00010,ko00030,ko00052,ko00500,ko00520,ko00901,ko01100,ko01110,ko02010,ko04148	C00031	-
MWSHC20109	0.930331	5.01e-07	-0.838624	9.37e-05	Coumarin	Lignans and Coumarins	Coumarins	C9H6O2	147.04	91.06	146.037	[M+H]+	1	91-64-5	C05851	1.55561e+06	1.45319e+06	1.1185e+06	1.0115e+06	976209	749439	1.17714e+06	1.24856e+06	1.12529e+06	422442	543877	517513	369692	373898	422611	598913	896116	630970	ko00999,ko01110	C05851	-
MWSHC20182	-0.934455	3.4e-07	0.891519	8.1e-06	Cyclo(L-tyrosyl-D-proline)	Amino acids and derivatives	Amino acids and derivatives	C14H16N2O3	261.12	136.08	260.116	[M+H]+	3	61117-56-4	-	4168.28	4168.28	4168.28	26078.4	29891.2	21048	20841.4	29877.9	21866.8	88516.9	66416.4	109682	100896	74639.2	71180.9	44012.3	35018.4	70720.6	-	-	-
MWSHC2047	-0.879075	1.59e-05	0.866491	2.93e-05	(+)-Syringaresinol O-beta-D-glucoside*	Lignans and Coumarins	Lignans	C28H36O13	579.21	417.16	580.216	[M-H]-	3	7374-79-0	C10890	51434.3	79317.8	58029.9	120274	120480	120217	119694	99892.7	132042	136321	175274	133205	156961	179059	138653	116580	118204	115127	-	C10890	-
MWSHC2062	0.900785	4.64e-06	-0.777176	0.000651116	Ferulic β-glucoside*	Phenolic acids	Phenolic acids	C16H20O9	355.1	193.05	356.111	[M-H]-	1	14364-12-6	-	1.54943e+06	1.24875e+06	1.13922e+06	1.26677e+06	1.12398e+06	1.15962e+06	1.23142e+06	1.25085e+06	1.495e+06	739395	671635	644032	597074	565764	583708	902944	928571	996261	-	CM02667	MetMap165,MetMap168,MetMap169
MWSHY0118	-0.852931	5.31e-05	0.762682	0.000944209	4',5,6,7-Tetramethoxyflavone	Flavonoids	Flavones	C19H18O6	343.12	282.09	342.11	[M+H]+	3	1168-42-9	C14472	30497	19306.3	23900	17865.4	17820.6	9913.38	12422.2	10559.5	16395.3	104916	76771.3	94313.6	90079.4	86281.3	61483.2	42241	39800.8	40170.8	-	C14472	-
MWSmce049	0.944585	1.17e-07	-0.86516	3.12e-05	3'-Hydroxypterostilbene	Others	Stilbene	C16H16O4	271.1	255.07	272.105	[M-H]-	2	475231-21-1	-	14250.4	19190.9	17056.6	11160.6	10603.9	14275.9	10528	9806.57	9631.64	7141.14	6561.1	4947.96	989.592	989.592	989.592	10906.7	9956.58	9714.86	-	CM02276	MetMap152
MWSmce448	0.867012	2.86e-05	-0.874597	1.99e-05	Imidazol-1-yl-acetic acid*	Alkaloids	Alkaloids	C5H6N2O2	127.05	81.04	126.043	[M+H]+	3	22884-10-2	-	2.10301e+06	2.23274e+06	2.30512e+06	1.85649e+06	1.67834e+06	1.78752e+06	1.70346e+06	1.58097e+06	1.66136e+06	1.47559e+06	1.51685e+06	1.50959e+06	1.58752e+06	1.3861e+06	1.04958e+06	1.58274e+06	2.02344e+06	1.83504e+06	-	-	-
MWSslk209	0.815822	0.000208661	-0.720629	0.00243875	Rhaponticin	Others	Stilbene	C21H24O9	421.15	259.1	420.142	[M+H]+	1	155-58-8	C10288	1.77142e+06	2.53385e+06	1.25331e+06	325129	502269	463195	1.24311e+06	1.37471e+06	1.58095e+06	241222	350845	317984	73303.2	94199.8	79952.7	734948	1.15916e+06	885308	-	C10288	MetMap152
MWStz255	-0.804399	0.00029959	0.690633	0.00436505	Cyclo(Pro-Phe)	Amino acids and derivatives	Amino acids and derivatives	C14H16N2O2	245.13	120.08	244.121	[M+H]+	3	3705-26-8	C11847	49532.4	48638.6	51490.3	47396.6	56942.4	69798.5	25538.1	39639	35958.1	112208	89987.8	126550	103453	76287.7	124256	76370	67869.9	76422.6	-	C11847	-
MWStz362	-0.820461	0.000178894	0.859423	4.03e-05	3,7,4'-Tri-O-methylquercetin	Flavonoids	Flavonols	C18H16O7	345.1	330.08	344.09	[M+H]+	1	572-32-7	C04444	1.16646e+07	8.6484e+06	7.07406e+06	1.46551e+07	1.63784e+07	1.40495e+07	1.33812e+07	1.74873e+07	1.64591e+07	1.7093e+07	2.25204e+07	1.66118e+07	1.75756e+07	1.94089e+07	1.74032e+07	1.49704e+07	1.34294e+07	1.97667e+07	ko00944,ko01110	C04444	-
MWStz389	-0.932761	4e-07	0.873513	2.1e-05	Cyclo(Ser-Pro)	Amino acids and derivatives	Amino acids and derivatives	C8H12N2O3	185.09	70.07	184.085	[M+H]+	2	1355217-25-2	-	219051	186899	188422	215934	274435	211247	236106	206031	216615	361676	406776	376342	353693	350252	352238	232440	236273	268489	-	-	-
PD0393826	-0.90968	2.57e-06	0.896469	6.05e-06	7-[4,5-dihydroxy-6-(hydroxymethyl)-3-(3,4,5-trihydroxy-6-methyloxan-2-yl)oxyoxan-2-yl]oxychromen-2-one	Lignans and Coumarins	Coumarins	C21H26O12	471.15	163.04	470.142	[M+H]+	3	-	-	232900	183979	73419	324689	308425	264340	417208	356090	415685	434759	565379	505082	481777	667135	523968	362674	294949	398398	-	-	-
PDN018956	0.945093	1.11e-07	-0.846865	6.8e-05	8-hydroxyoctadeca-9,11-dienoic acid	Lipids	Free fatty acids	C18H32O3	297.24	69.07	296.235	[M+H]+	3	-	-	233974	237416	209099	160830	182071	148936	193200	200097	224314	91007.1	96593.7	106488	81006.2	89927.6	99472.2	171320	172433	185385	-	-	-
PDP051559	0.947522	8.28e-08	-0.909474	2.61e-06	2-(2,6-dihydroxy-4-methylphenyl)-6-(hydroxymethyl)oxane-3,4,5-triol	Others	Others	C13H18O7	287.11	125.06	286.105	[M+H]+	2	-	-	860419	699369	741655	392223	436650	449400	379958	353619	487849	198641	206503	190585	51145.2	29596.8	25993.1	441588	364042	433255	-	-	-
PDP133927	-0.885019	1.16e-05	0.792017	0.000432386	3-methyl-2-[(5-oxopyrrolidin-2-yl)formamido]pentanoic acid*	Amino acids and derivatives	Amino acids and derivatives	C11H18N2O4	243.13	86.1	242.127	[M+H]+	3	-	-	16523.6	15971.7	25620.8	27039	44367.3	48129.4	34665.3	32677.9	35367	79079.4	46109.2	119664	92517.5	100520	89712.9	75891.8	55206.5	64931.6	-	-	-
PDP191855	0.806651	0.000279481	-0.740028	0.00160864	(3,4,5,6-tetrahydroxyoxan-2-yl)methyl 4-hydroxy-2-(hydroxymethyl)benzoate	Organic acids	Organic acids	C14H18O9	331.1	151.04	330.095	[M+H]+	2	-	-	87383.8	85309.7	65974.6	65720.1	73113.8	55433.1	92580.4	55007.9	58642.2	24670.6	57948.7	44400.2	29318.6	33628.3	43702.4	49781.5	59559	44078.4	-	-	-
PDP233721	-0.931518	4.49e-07	0.830559	0.000126009	4,5-dihydroxy-2-methyl-3-{[(2s,3r,4s,5s,6r)-3,4,5-trihydroxy-6-(hydroxymethyl)oxan-2-yl]oxy}benzoic acid	Phenolic acids	Phenolic acids	C14H18O10	347.1	185.04	346.09	[M+H]+	3	-	-	1.03688e+06	964710	739448	942112	1.23789e+06	860324	959455	1.06595e+06	998498	1.49275e+06	1.65785e+06	1.4661e+06	1.53355e+06	1.64381e+06	1.566e+06	1.17091e+06	1.12907e+06	1.12299e+06	-	-	-
pmc0281	-0.849361	6.15e-05	0.799095	0.000351638	Ribosyladenosine	Nucleotides and derivatives	Nucleotides and derivatives	C15H21N5O8	400.15	136.06	399.139	[M+H]+	3	-	-	678917	671300	577366	734676	826701	734362	831938	818576	821914	818732	910721	803430	879719	1.03038e+06	960125	819636	747667	763894	-	-	-
pmd0130	0.848855	6.28e-05	-0.792606	0.000425138	LysoPC 14:0	Lipids	LPC	C22H46NO7P	468.31	184.07	467.301	[M+H]+	2	20559-16-4	-	77537	75604.5	54372.1	40447.7	49187.4	56492.8	59153.2	59632.5	45825.7	36403.5	36316.2	45375	32239.2	33894.7	30772.2	48099.9	47618.2	55860.6	-	-	-
pme2435	0.810661	0.000246426	-0.638332	0.0104389	L-Fucose*	Others	Saccharides	C6H12O5	163.06	59.01	164.069	[M-H]-	3	-	C01019	147077	169244	201450	92932.4	182562	125893	175819	193723	170896	116036	92146.4	101247	95481	81734.3	86628.7	164856	147685	107226	ko00051,ko00520,ko01100,ko01250	C01019	-
pme3017	0.918413	1.36e-06	-0.916283	1.6e-06	2-Amino-2-methylpropanoate	Organic acids	Organic acids	C4H9NO2	104.07	58.07	103.063	[M+H]+	3	62-57-7	C03665	9.73207e+06	9.672e+06	7.97835e+06	7.22709e+06	6.89969e+06	7.26995e+06	7.35336e+06	7.33851e+06	7.18002e+06	4.04097e+06	5.82582e+06	5.25659e+06	5.12709e+06	5.21691e+06	4.86248e+06	7.36789e+06	8.28965e+06	7.26406e+06	-	C03665	-
pmn001382	0.932178	4.23e-07	-0.925319	7.78e-07	Isochlorogenic acid A*	Phenolic acids	Phenolic acids	C25H24O12	515.12	353.09	516.127	[M-H]-	3	2450-53-5	-	39625	39454.5	65050.1	30949.6	24533.3	37926.6	27289.8	23202	25236	4640.41	4640.41	4640.41	4640.41	4640.41	4640.41	45315	24842.7	31341.9	-	-	-
pmp001014	0.843819	7.67e-05	-0.737363	0.00170677	1-Glycosyloxy-2-hydroxy-4-methoxyxanthone	Flavonoids	Other Flavonoids	C20H20O10	421.11	259.1	420.106	[M+H]+	3	-	-	3.13377e+06	4.41925e+06	2.57785e+06	599165	1.01109e+06	872430	2.54905e+06	2.41049e+06	2.89787e+06	415917	633354	514729	147863	81161.9	81917.6	1.72768e+06	1.72388e+06	1.94147e+06	-	-	-
pmp001125	0.950214	5.92e-08	-0.857869	4.31e-05	Dendrobin A	Phenolic acids	Phenolic acids	C16H18O4	275.13	151.08	274.12	[M+H]+	3	-	-	91465.6	103389	104490	69483.8	77446.4	82945.5	85947.6	60326.9	70681.2	47037.7	56701.9	45298.3	26658.6	28380.9	24731.9	62460.7	69984.4	64262	-	-	-
pmp001244	0.890971	8.36e-06	-0.830922	0.000124379	Caffeoylcholine	Alkaloids	Phenolamine	C14H20NO4+	266.14	207.07	266.139	[M]+	3	87189-10-4	-	105720	153550	169987	182255	158425	87245.3	108430	111569	137217	14636.2	14636.2	14636.2	14636.2	14636.2	14636.2	84266.7	73181.2	95666.2	-	-	-
Qmyp101114	-0.901818	4.34e-06	0.824731	0.000154669	9-O-β-D-Glucoside of 3-hydroxy-7,8-didehydro-β-ionol*	Terpenoids	Sesquiterpenoids	C19H30O7	371.21	209.15	370.199	[M+H]+	1	-	-	731462	691314	439058	403455	219798	244904	738293	951241	883806	3.04554e+06	3.92345e+06	2.96886e+06	3.85952e+06	3.52671e+06	2.57198e+06	2.10364e+06	3.0106e+06	1.50388e+06	-	-	-
Rfn001798	-0.849837	6.04e-05	0.82583	0.000148888	H-Pro-Ile-OH	Amino acids and derivatives	Amino acids and derivatives	C11H20N2O3	229.15	70.07	228.147	[M+H]+	2	51926-51-3	-	2.33694e+06	2.56402e+06	1.41868e+06	2.11448e+06	2.21756e+06	2.26852e+06	2.52159e+06	2.93657e+06	2.91145e+06	3.22227e+06	3.33898e+06	3.96666e+06	4.17639e+06	3.55959e+06	3.23202e+06	2.43683e+06	2.76645e+06	2.36009e+06	-	-	-
Rfn031356	-0.885227	1.15e-05	0.843733	7.7e-05	Apiosylglucosyl 4-hydroxybenzoate*	Phenolic acids	Phenolic acids	C18H24O12	431.12	137.02	432.127	[M-H]-	2	-	-	529580	517855	450411	465950	483492	569537	612955	600071	596786	715669	796368	903570	752073	939735	739799	681535	713919	806060	-	-	-
Rfn03227	-0.89344	7.24e-06	0.814597	0.000217158	Pyr-phe-OH	Amino acids and derivatives	Amino acids and derivatives	C14H16N2O4	277.12	120.08	276.111	[M+H]+	3	21282-12-2	-	36305.4	46100.1	37885.5	47221.9	35394.9	39932.5	58045.5	65398.3	47993	201505	155576	207454	263827	146413	200912	99228.4	73479.4	96307	-	-	-
Rfn05148	-0.929193	5.55e-07	0.842639	8.03e-05	5-Megastigmen-7-yne-3,9-diol 3-glucoside	Others	Others	C19H30O7	371.2	209.15	370.199	[M+H]+	1	-	-	425939	403204	534948	258795	314768	255103	1.21634e+06	1.37922e+06	1.29e+06	3.28344e+06	3.12887e+06	3.4502e+06	3.45455e+06	4.52693e+06	4.52521e+06	2.05355e+06	1.62467e+06	2.46933e+06	-	-	-
Rfn063680	0.961357	1.17e-08	-0.8427	8.02e-05	2-β-D-Glucopyranosyloxy-4-methoxy-cis-cinnamic acid	Phenolic acids	Phenolic acids	C16H20O9	355.1	175.04	356.111	[M-H]-	1	-	-	1.2912e+07	1.55579e+07	1.7934e+07	1.21703e+07	1.36459e+07	1.25811e+07	1.44343e+07	1.42114e+07	1.29608e+07	7.29422e+06	7.65225e+06	7.5952e+06	5.23216e+06	6.76907e+06	6.00101e+06	1.1305e+07	1.30677e+07	1.25107e+07	-	-	-
Rfp02744	0.839604	9.03e-05	-0.801219	0.000329975	Hamamelitannin	Phenolic acids	Phenolic acids	C20H20O14	502.12	153.02	484.085	[M+NH4]+	3	469-32-9	-	42492	34467.2	34024.4	26412.3	32773.2	14468.2	30251.2	26456.5	19419.4	17433.9	13998.8	17837.4	10713.1	16469.2	4293.69	13891.1	26236.4	26285.8	-	-	-
Rlp00276	0.93645	2.8e-07	-0.817468	0.000197665	1-[(2R)-Pyrrolidin-2-yl]propan-2-one	Alkaloids	Alkaloids	C7H13NO	128.11	70.07	127.1	[M+H]+	3	130325-43-8	-	1.42113e+06	1.07814e+06	1.1178e+06	792412	751495	791535	945646	1.12116e+06	976929	488922	546303	489741	305764	264105	310074	681721	841249	735090	-	-	-
Rlp011429	0.888058	9.85e-06	-0.81147	0.000240164	5-(6-hydroxy-6-methylheptan-2-yl)-4a-methyl-decahydronaphthalen-1-ol	Terpenoids	Sesquiterpenoids	C19H36O2	297.28	69.07	296.272	[M+H]+	3	-	-	240606	268186	222373	132687	172022	152069	212057	217866	228100	109719	109021	84732.5	98127.1	119266	121846	180144	180498	188501	-	-	-
Safn000917	0.948411	7.43e-08	-0.814161	0.000220254	D-Mannose 6-phosphate	Others	Saccharides	C6H13O9P	259.02	78.96	260.03	[M-H]-	1	-	C00275	4.88935e+06	5.84831e+06	5.36268e+06	4.19432e+06	4.25011e+06	4.3807e+06	5.18525e+06	4.68282e+06	4.61588e+06	3.37048e+06	3.52793e+06	3.46973e+06	2.95585e+06	2.97247e+06	2.40203e+06	4.56441e+06	4.24932e+06	4.25178e+06	ko00051,ko00520,ko01100,ko01110,ko01240,ko01250	C00275	-
Sahp003984	-0.850574	5.86e-05	0.849226	6.19e-05	Sonnerstigmane D	Terpenoids	Sesquiterpenoids	C19H30O8	385.19	85.03	386.194	[M-H]-	3	1638956-06-5	-	83263.2	67487.7	72771.1	96078.7	87332.9	69484.2	96623.3	107698	95413.5	128891	113826	100478	112241	119675	130753	111193	100208	96785.3	-	-	-
Saln001520	-0.928114	6.11e-07	0.925881	7.41e-07	Teuhircoside	Terpenoids	Monoterpenoids	C15H20O9	343.1	181.05	344.111	[M-H]-	3	-	-	621901	748057	653202	816154	805388	850423	938354	940664	998319	1.05636e+06	1.16923e+06	1.22741e+06	1.0868e+06	1.32325e+06	1.18073e+06	893514	968321	870835	-	-	-
Salp004689	-0.813013	0.000228574	0.716558	0.00265017	Platanionoside F	Terpenoids	Sesquiterpenoids	C24H38O11	503.25	133.1	502.241	[M+H]+	2	450414-28-5	-	46523.7	58643.8	67421.7	90689	70475.5	55347.7	45267.9	61818.3	57862.5	127610	93126.4	105809	103524	123619	83017	87496.3	65158.2	62953.3	-	-	-
Sasp005342	-0.906289	3.24e-06	0.829487	0.000130924	(6R,9S)-3-Oxo-alpha-ionol glucoside*	Terpenoids	Sesquiterpenoids	C19H30O7	371.21	209.16	370.199	[M+H]+	1	-	-	633017	553872	365111	293417	212148	227177	607597	816123	908921	2.42491e+06	3.16428e+06	2.95653e+06	3.51381e+06	2.91963e+06	2.31529e+06	1.74901e+06	2.77335e+06	1.27024e+06	-	-	-
Sasp006960	0.837847	9.65e-05	-0.823507	0.000161318	N-[(2S)-2-hydroxy-2-phenylethyl]benzenecarboximidic acid	Others	Others	C15H15NO2	242.12	121.06	241.11	[M+H]+	3	-	-	22944.6	19983.4	33755.2	10840.5	15202.6	20500.8	11819.7	12499.8	5124.25	5928.72	11066.1	7462.46	1024.85	1024.85	1024.85	21037.1	12706.4	12949.5	-	-	-
Wacyp01167	-0.946647	9.2e-08	0.881656	1.39e-05	(6-amino-3-oxohexan-2-yl)proline	Amino acids and derivatives	Amino acids and derivatives	C11H20N2O3	229.15	142.09	228.147	[M+H]+	1	-	-	6.19701e+06	6.36789e+06	4.66861e+06	6.29445e+06	6.77448e+06	6.43027e+06	7.5364e+06	7.59985e+06	8.14306e+06	9.35179e+06	9.69881e+06	9.21795e+06	1.09671e+07	1.09051e+07	1.03299e+07	8.21933e+06	7.95004e+06	7.80341e+06	-	-	-
Wahln04592	-0.857379	4.4e-05	0.830684	0.000125445	3,7-Dimethyl-5-Oxo-2,6-Octadien-1-Yl]Beta-D-Glucopyranoside	Terpenoids	Monoterpenoids	C16H26O7	389.18	161.05	330.168	[M+CH3COO]-	1	-	-	1233.62	1233.62	1233.62	6168.08	9182.52	8334.93	10442.5	13079.2	11435.7	21947.9	13382.5	35309.6	25440	34087.5	15209.1	14862.5	15264	23238.8	-	-	-
Wahsn02657	-0.901425	4.45e-06	0.874943	1.96e-05	1-O-p-Coumaroyl Octose	Phenolic acids	Phenolic acids	C17H22O10	385.11	163.04	386.121	[M-H]-	2	-	-	13653.8	10630.8	9877.95	14840.6	18110.2	14681.5	18751.5	18537.8	21423.9	19698.9	34855.6	27932.4	28193.3	27938.4	30785.6	24266.2	21806	18178.5	-	-	-
Walbp03047	0.921429	1.07e-06	-0.763206	0.000932013	6-Hydroxy-7-methoxydihydrocoumarin*	Lignans and Coumarins	Coumarins	C10H10O4	195.06	117.03	194.057	[M+H]+	1	-	-	6.28987e+06	6.76812e+06	7.25005e+06	4.25865e+06	4.36572e+06	5.68723e+06	7.0276e+06	5.7911e+06	7.03064e+06	3.48752e+06	2.35233e+06	3.19462e+06	3.03118e+06	1.90118e+06	2.03372e+06	5.95543e+06	5.09292e+06	5.81511e+06	-	-	-
WapTKC007329	0.861887	3.61e-05	-0.81407	0.000220908	Austrodorin	Terpenoids	Ditepenoids	C23H40O4	381.3	289.25	380.293	[M+H]+	3	169238-54-4	-	43175.7	18259.2	56609.3	21402.8	30610	33813.7	23838.8	21303.7	40353.3	3651.84	3651.84	3651.84	3651.84	3651.84	3651.84	34526.3	43871.8	28961.6	-	-	-
WapTKC018601	0.845707	7.12e-05	-0.725087	0.00222299	Cyanthiwigin AA	Terpenoids	Ditepenoids	C20H26O3	315.2	161.09	314.188	[M+H]+	1	481643-62-3	-	76366.8	64383.7	82732.6	52460.7	58457.3	81351.4	62204.5	70034.7	78739.3	38217.4	58631.3	38663.6	43571.2	35292.1	33298	52225.5	56178.7	57896.5	-	-	-
WapTKC205981	0.87396	2.05e-05	-0.865771	3.03e-05	Periconianone K	Others	Others	C12H16O3	209.12	131.09	208.11	[M+H]+	1	-	-	321827	322824	366854	195777	147423	146690	183645	163667	198663	63458	119177	161762	121622	52853.5	59132.1	147015	190243	195930	-	-	-
Waptp03206	0.873168	2.14e-05	-0.750765	0.00125819	7-Hydroxy-8-Methoxychromanon*	Lignans and Coumarins	Coumarins	C10H10O4	195.06	117.03	194.057	[M+H]+	1	-	-	3.81643e+06	4.33367e+06	3.39093e+06	1.77244e+06	2.21559e+06	2.9012e+06	3.07764e+06	4.82646e+06	2.58233e+06	1.40718e+06	1.07534e+06	1.26299e+06	1.12673e+06	822455	695066	2.05604e+06	1.98661e+06	2.10534e+06	-	-	-
Wasn003258	-0.860694	3.81e-05	0.705498	0.00329932	Glucosyl 2-Hydroxy-4-Methylpentanoic Acid	Organic acids	Organic acids	C12H22O8	293.12	131.07	294.132	[M-H]-	1	-	-	2.2246e+06	2.2995e+06	2.14558e+06	2.34025e+06	2.16149e+06	2.29512e+06	1.72609e+06	1.76261e+06	1.89448e+06	3.3207e+06	3.37994e+06	3.28985e+06	3.34827e+06	3.15705e+06	3.26448e+06	2.30568e+06	2.66019e+06	2.50084e+06	-	-	-
Wasn005621	0.967321	4e-09	-0.925874	7.42e-07	Glucosyl 9-hydroxy-3-methyldec-2-enoic acid	Terpenoids	Monoterpenoids	C17H30O8	361.19	199.13	362.194	[M-H]-	3	-	-	22739.6	18526.2	27946.1	15528.2	16313.7	18162.7	17041.3	12988.1	17424.5	2597.62	2597.62	2597.62	2597.62	2597.62	2597.62	28504.7	19616.6	13510	-	-	-
WaXYp02237	0.83304	0.000115218	-0.730995	0.00196088	glutamyl-tyramine	Amino acids and derivatives	Amino acids and derivatives	C13H18O4N2	267.13	121.07	266.125	[M+H]+	2	-	-	500411	701975	561004	378719	455867	322074	300960	439356	358957	390391	308898	319479	71870.6	132855	78530	397998	391651	327884	-	-	-
Wbwp010459	0.842715	8.01e-05	-0.839496	9.06e-05	5-[(2r,3s,4s,5s)-5-(2h-1,3-benzodioxol-5-yl)-3,4-dimethyloxolan-2-yl]-2-methoxyphenol*	Lignans and Coumarins	Lignans	C20H22O5	343.15	163.07	342.147	[M+H]+	1	-	-	4.12013e+06	4.00485e+06	4.30608e+06	3.58654e+06	3.67622e+06	4.34287e+06	3.77595e+06	3.84394e+06	3.76525e+06	3.15412e+06	3.3183e+06	3.5403e+06	3.4499e+06	3.2815e+06	3.51551e+06	3.45745e+06	3.83673e+06	3.46207e+06	-	-	-
Wchn003892	0.889775	8.94e-06	-0.757522	0.00107125	Juglanoside E	Others	Others	C16H20O9	355.11	193.05	356.111	[M-H]-	2	-	-	1.62555e+06	1.13178e+06	1.24918e+06	1.29212e+06	1.12777e+06	1.08065e+06	1.2224e+06	1.36011e+06	1.50689e+06	724482	587526	697681	599538	501966	536401	955974	1.09467e+06	1.03049e+06	-	-	-
Wdbn007622	0.898061	5.49e-06	-0.729068	0.0020435	Stilbostemin Q	Others	Stilbene	C16H18O4	273.12	122.04	274.12	[M-H]-	2	-	-	15168.2	15481.7	20851.5	8520.85	10720.8	12484.6	13375.4	13324.7	13041.9	8267.2	10296	7848.7	1569.74	1569.74	1569.74	12576	14555.8	12768.9	-	-	-
Wdbp006366	0.916565	1.56e-06	-0.832816	0.000116159	Stilbostemin K	Others	Stilbene	C16H18O4	275.13	151.08	274.12	[M+H]+	3	-	-	94044.4	121985	97983.5	54496.7	62218.4	95271.5	67741.5	70387.6	77363.1	44902	53826.4	40212.6	22566.4	24525.2	18498.9	66814.2	81262.2	54224.4	-	-	-
Wdhp004605	-0.859582	4e-05	0.792462	0.000426895	7-methoxy-1-[(4-methoxyphenyl)methyl]-2-methyl-3,4-dihydro-1h-isoquinolin-6-ol	Alkaloids	Isoquinoline alkaloids	C19H23NO3	314.17	121.06	313.168	[M+H]+	3	-	-	8058.88	8058.88	8058.88	8058.88	8058.88	8058.88	8058.88	8058.88	8058.88	55340.7	40294.4	89089.9	47136.5	54979.7	57174.4	127544	50653.5	94620.7	-	-	-
Wdjp001467	-0.904885	3.56e-06	0.800548	0.000336695	2-(7-hydroxy-2,4-dimethoxyphenanthren-3-yl)oxy-6-(hydroxymethyl)oxane-3,4,5-triol	Others	Others	C22H24O9	433.14	139.05	432.142	[M+H]+	1	-	-	3.00824e+06	2.8914e+06	2.27135e+06	2.78158e+06	3.04425e+06	2.89377e+06	3.04143e+06	2.6967e+06	3.41157e+06	3.85811e+06	3.6643e+06	4.09199e+06	3.719e+06	4.54087e+06	4.24532e+06	3.58176e+06	3.4237e+06	3.31346e+06	-	-	-
Wdjp005489	0.816847	0.000201753	-0.76206	0.000958849	2-(4-hydroxy-3-methoxyphenyl)-3-(hydroxymethyl)-9-methoxy-2,3,4,5-tetrahydronaphtho[2,1-e][1]benzofuran-7-ol	Others	Others	C25H24O6	421.15	259.1	420.157	[M+H]+	3	-	-	2.62811e+06	3.99261e+06	2.49126e+06	529782	373257	448303	1.7017e+06	1.47981e+06	2.11717e+06	264800	435784	397614	62245.2	103796	88416.8	1.04967e+06	1.37329e+06	891882	-	-	-
Yamp010899	0.884268	1.21e-05	-0.798307	0.000359966	Eichlerialactone	Terpenoids	Triterpene	C27H42O4	431.32	177.09	430.308	[M+H]+	3	-	-	64832.4	52098.3	51307.3	67720.1	42967.6	43634.2	26836.4	46163.1	63714.1	18944.5	7160.03	14927.4	1432.01	1432.01	1432.01	57720.5	63468.4	56177.8	-	-	-
Zamn00402	-0.927595	6.39e-07	0.903393	3.93e-06	sorbose*	Others	Saccharides	C6H12O6	179.06	59.01	180.063	[M-H]-	1	-	-	2.50043e+06	2.59416e+06	2.38416e+06	2.86408e+06	3.10037e+06	2.96922e+06	3.03437e+06	3.15364e+06	3.02447e+06	3.10364e+06	3.58982e+06	3.61914e+06	3.49849e+06	3.75472e+06	3.47239e+06	2.90113e+06	3.0275e+06	3.10183e+06	-	-	-
Zbln007289	0.962422	9.8e-09	-0.882534	1.33e-05	fimbriol B	Quinones	PhenAnthraquinones	C15H12O4	255.07	212.05	256.074	[M-H]-	1	152841-84-4	-	2.77393e+06	3.23569e+06	3.3933e+06	2.24044e+06	2.4415e+06	2.72716e+06	1.8753e+06	2.10412e+06	2.00532e+06	1.03027e+06	1.27188e+06	1.00029e+06	229206	200157	214084	2.00253e+06	1.80311e+06	1.90188e+06	-	CM02186	MetMap162
Zbln007588	0.962193	1.02e-08	-0.879041	1.59e-05	ephemeranthoquinone	Quinones	PhenAnthraquinones	C15H12O4	255.07	211.04	256.074	[M-H]-	1	-	-	1.7654e+06	2.02208e+06	2.11582e+06	1.36764e+06	1.52605e+06	1.71452e+06	1.15984e+06	1.36657e+06	1.27747e+06	644391	808119	656963	147888	133613	132042	1.17286e+06	1.16154e+06	1.25436e+06	-	-	-
Zblp006959	0.961542	1.14e-08	-0.904825	3.58e-06	retusiusine D	Quinones	PhenAnthraquinones	C15H12O4	257.08	211.08	256.074	[M+H]+	1	-	-	348534	442806	384056	278427	314508	355228	239644	248592	263222	110542	143879	98777.4	32239.8	50559.4	36251.6	235577	235961	218778	-	-	-
ZbWp003008	-0.843711	7.71e-05	0.782899	0.000558083	N-Ethylphenylalanine	Amino acids and derivatives	Amino acids and derivatives	C11H15NO2	194.12	120.08	193.11	[M+H]+	3	-	-	35629.2	33319.6	3994.56	37829.9	36931.3	38156.5	27420.3	19972.8	35309.8	62395.1	64633.8	62121.6	50602	57322.3	49196.5	22198.3	58715.5	41420.7	-	-	-
Zbyp002402	0.968331	3.27e-09	-0.914693	1.8e-06	Methylarbutin*	Phenolic acids	Phenolic acids	C13H18O7	287.11	107.05	286.104	[M+H]+	1	6032-32-2	C17599	592915	619318	608195	316004	384758	337902	337917	381311	309055	128480	184752	160269	26847.6	28848.9	32159.1	327821	296485	336672	-	C17599	-
Zjbn102534	0.885595	1.13e-05	-0.807013	0.000276361	2,7-Dihydroxy-3,5-dimethoxy-9,10-dihydrophenanthrene	Others	Others	C16H16O4	271.1	241.05	272.105	[M-H]-	3	108853-10-7	-	29778.4	36773.3	32492.8	22419.2	24670.3	20976.6	20296.9	15824.2	23788.9	15952.6	15550.2	20206.4	5152.65	6746.12	4935.59	16449.4	18681.5	19822.1	-	CM02196	MetMap162
Zken113980	0.940968	1.75e-07	-0.834866	0.000107771	beta-D-Fructose 2-phosphate	Others	Saccharides	C6H13O9P	259.02	96.97	260.03	[M-H]-	1	-	C03267	8.42273e+06	8.64667e+06	9.02736e+06	6.09832e+06	6.66248e+06	6.43654e+06	8.06014e+06	7.34389e+06	6.96378e+06	4.98874e+06	5.79903e+06	5.54583e+06	4.44604e+06	4.89138e+06	4.27427e+06	6.46556e+06	6.77882e+06	6.62858e+06	ko00051,ko01100	C03267	-
Zmdp001663	0.848291	6.43e-05	-0.755546	0.00112342	γ-Glu-Met	Amino acids and derivatives	Amino acids and derivatives	C10H18N2O5S	279.1	133.03	278.094	[M+H]+	3	17663-87-5	-	38492.7	82838.9	69073	65109.1	63396.4	74152.3	63937.4	49560.2	58361.4	21500.6	26549.2	37079.7	24110	20369.8	21310.3	29706	36776.7	50344.7	-	-	-
Zmhn002422	0.954209	3.47e-08	-0.807727	0.000270275	1-O-Feruloyl-beta-D-glucose*	Phenolic acids	Phenolic acids	C16H20O9	355.1	193.05	356.111	[M-H]-	1	7196-71-6	C17759	1.3046e+06	1.31255e+06	1.19587e+06	1.07624e+06	1.01787e+06	1.14683e+06	1.26649e+06	1.13885e+06	1.30647e+06	678787	709595	656641	549137	508744	507720	998999	1.0017e+06	935543	-	C17759	MetMap165,MetMap166,MetMap168,MetMap169
Zmhp004065	-0.873537	2.1e-05	0.830369	0.000126868	7,8-Dihydroxy-5,6,4'-trimethoxyflavone*	Flavonoids	Flavones	C18H16O7	345.1	330.07	344.09	[M+H]+	1	-	-	8.48383e+06	7.48996e+06	5.52708e+06	7.69743e+06	1.22937e+07	1.35106e+07	1.37537e+07	1.09792e+07	1.1765e+07	1.44186e+07	1.35421e+07	1.72288e+07	1.56036e+07	2.01256e+07	1.58819e+07	1.36153e+07	1.53194e+07	1.83975e+07	-	-	-

## Sheet: Blue
Index	MM	MM.p	GS	GS.p	Compounds	Class I	Class II	Formula	Q1 (Da)	Q3 (Da)	Molecular weight (Da)	Ionization model	Level	CAS	cpd_ID	120DAI_1	120DAI_2	120DAI_3	180DAI_1	180DAI_2	180DAI_3	240DAI_1	240DAI_2	240DAI_3	300DAI_1	300DAI_2	300DAI_3	360DAI_1	360DAI_2	360DAI_3	QC01	QC02	QC03	kegg_map	mw_cpd_ID	mw_map
Cmsp010182	0.93012	5.11e-07	-0.866858	2.88e-05	Isocupressic acid	Terpenoids	Ditepenoids	C20H32O3	321.24	149.13	320.235	[M+H]+	3	1909-91-7	-	910720	862194	844189	549231	513205	470799	136532	169666	152372	204486	253169	300016	155051	203125	177117	651330	601783	605297	-	-	-
Hahp005583	-0.87384	2.07e-05	0.765565	0.000878733	Sesuvioside A*	Flavonoids	Isoflavones	C29H34O16	639.19	331.08	638.185	[M+H]+	1	-	-	3.35226e+06	3.25577e+06	2.99389e+06	8.23436e+06	8.5903e+06	7.98764e+06	7.42852e+06	6.81355e+06	7.06318e+06	8.17806e+06	9.06312e+06	7.93721e+06	7.17517e+06	7.44473e+06	7.22783e+06	6.23349e+06	6.16e+06	6.77783e+06	-	-	-
HJAP135	0.971636	1.61e-09	-0.844176	7.57e-05	Pinocembrin-7-O-(6''-O-malonyl)glucoside	Flavonoids	Flavanones	C24H24O12	505.12	257.08	504.127	[M+H]+	3	-	-	3.2948e+06	2.90757e+06	3.05979e+06	1.31356e+06	1.34817e+06	1.32843e+06	619071	675781	697669	888301	991161	932066	134309	163665	155371	1.48663e+06	1.50094e+06	1.4023e+06	-	-	-
Hmgp003086	-0.849561	6.1e-05	0.777548	0.000644705	Tricin-7-O-rutinoside*	Flavonoids	Flavones	C29H34O16	639.19	331.08	638.185	[M+H]+	1	-	-	3.68776e+06	3.20089e+06	2.66565e+06	8.26099e+06	7.91966e+06	8.61788e+06	7.48495e+06	7.03184e+06	8.01342e+06	8.93629e+06	9.07776e+06	8.86703e+06	6.793e+06	6.71282e+06	7.77888e+06	6.59749e+06	5.71502e+06	6.30117e+06	-	-	-
Hmhn000927	-0.899082	5.16e-06	0.82007	0.00018126	Phloroglucinol-1-O-β-D-glucopyranoside	Others	Others	C12H16O8	287.08	125.02	288.084	[M-H]-	2	-	-	115971	119739	87114.4	217604	187200	198937	226705	240529	247776	187633	234706	268377	239932	288122	271908	195288	198023	197247	-	-	-
Hmlp005811	0.858593	4.18e-05	-0.731467	0.00194107	Monbarbatain A	Quinones	PhenAnthraquinones	C30H22O6	479.14	239.07	478.142	[M+H]+	1	138711-55-4	-	96435.4	210371	97413.4	5227.16	5227.16	5227.16	26135.8	28085.1	27720.7	5227.16	5227.16	5227.16	5227.16	5227.16	5227.16	43178.9	57415.3	47291.2	-	-	-
Hmmn007137	0.86851	2.67e-05	-0.622731	0.0131528	3-Methoxy-4',5-dihydroxy-trans-stilbene*	Others	Stilbene	C15H14O3	241.09	225.05	242.094	[M-H]-	1	42438-89-1	C20154	438170	374965	305091	224708	205913	209672	133994	148925	138831	266925	233386	234824	44592.5	48609.4	37460.9	199559	217548	203558	-	C20154	-
Hmsp004517	0.937353	2.56e-07	-0.686321	0.00472049	[4]-Gingerol	Phenolic acids	Phenolic acids	C15H22O4	267.15	137.06	266.152	[M+H]+	1	77398-90-4	-	192778	143691	101045	36168.5	37631.5	43133.2	19958.2	38584.8	35686.7	45783.9	45176.8	46572.3	36353.1	49705.9	40449.5	68495.7	125622	90848.8	-	-	-
Hmsp005892	0.97757	3.55e-10	-0.777043	0.000653429	[4]-Shogaol	Phenolic acids	Phenolic acids	C15H20O3	249.14	137.06	248.141	[M+H]+	1	-	-	2.80285e+06	2.41645e+06	2.3107e+06	1.06826e+06	1.0604e+06	932204	596276	655706	761532	1.26676e+06	846013	872859	374060	595972	372716	2.78054e+06	2.75088e+06	2.59197e+06	-	-	-
Hmsp007613	0.931702	4.42e-07	-0.866538	2.93e-05	[8]-Gingerdione	Phenolic acids	Phenolic acids	C19H28O4	321.2	137.06	320.199	[M+H]+	3	77334-06-6	-	1.29719e+06	1.37251e+06	1.18305e+06	708851	770975	714833	209136	191170	171643	318904	343487	364367	243174	246088	244159	959253	899233	814552	-	-	-
HX1226	-0.904603	3.63e-06	0.857091	4.46e-05	4-Hydroxy-β-bulnesene	Others	Others	C15H24O	221.19	107.09	220.183	[M+H]+	1	-	-	346792	466396	340407	1.23705e+06	1.14965e+06	1.19033e+06	928557	1.08279e+06	1.05438e+06	1.22253e+06	1.37474e+06	1.31634e+06	1.20217e+06	1.32768e+06	1.325e+06	898761	900388	959134	-	-	-
HX1368	0.909921	2.53e-06	-0.805185	0.000292439	dihydro-5-(hydroxymethyl)-2(3H)-furanone	Others	Others	C5H8O3	117.05	71.05	116.047	[M+H]+	3	-	-	1.86226e+06	1.68367e+06	1.58943e+06	776969	846545	870852	938834	868503	949037	757914	801888	816462	305924	232928	251357	841133	1.01547e+06	852501	-	-	-
Labn004065	0.946041	9.89e-08	-0.662798	0.00708328	4-Hydroxybenzoyl acetyl glucoside	Phenolic acids	Phenolic acids	C15H18O9	341.09	137.03	342.095	[M-H]-	2	-	-	118620	86764.5	69535.2	38117	37711.4	24039.9	35157.3	28104.8	26616.6	42545.1	44023.5	45102	23661.8	21388.9	19972.3	51742.4	35887.1	43622.9	-	CM02471	MetMap157
Lahp004712	-0.834542	0.000109061	0.787364	0.000493266	Rhamnosyl-Rhamnazin-3-O-β-D-glucoside	Flavonoids	Flavonols	C29H34O16	639.19	331.08	638.185	[M+H]+	1	-	-	2.01547e+06	2.08282e+06	1.87053e+06	3.24427e+06	3.4898e+06	3.72966e+06	6.729e+06	6.1366e+06	6.14286e+06	4.69144e+06	5.66231e+06	5.45445e+06	5.14814e+06	5.6708e+06	4.87763e+06	4.04138e+06	4.45163e+06	4.32348e+06	-	-	-
Lahp004989	-0.913145	2.01e-06	0.737408	0.00170509	3,7,3'-Tri-O-methylquercetin-4'-O-β-D-apiofuranosyl-(1→2)-O-β-d-glucopyranoside*	Flavonoids	Flavonols	C29H34O16	639.19	345.1	638.185	[M+H]+	1	-	-	4.20303e+06	3.62868e+06	3.67815e+06	8.39638e+06	8.61923e+06	8.65013e+06	9.5137e+06	1.03442e+07	9.69753e+06	8.38502e+06	9.5663e+06	9.33076e+06	8.02183e+06	7.85882e+06	8.41587e+06	7.57762e+06	7.03993e+06	7.56607e+06	-	-	-
Lajp008011	0.811334	0.000241206	-0.822197	0.000168694	Murratin A	Lignans and Coumarins	Coumarins	C15H14O4	259.1	131.05	258.089	[M+H]+	2	-	-	19272.9	17534.5	38407.3	11740.2	5366.19	15232.7	1073.24	1073.24	1073.24	1073.24	1073.24	1073.24	1073.24	1073.24	1073.24	37451.1	27204.4	30242.4	-	-	-
Lamp000484	0.85011	5.97e-05	-0.744575	0.00145173	4-Methylazetidine-2-Carboxylic acid	Alkaloids	Alkaloids	C5H9NO2	116.07	70.06	115.063	[M+H]+	1	1779725-63-1	-	2.84037e+07	2.36139e+07	2.39083e+07	1.1243e+07	1.02615e+07	9.88968e+06	1.68596e+07	1.61435e+07	1.61632e+07	1.00979e+07	1.32486e+07	1.2e+07	5.21519e+06	4.17146e+06	4.16494e+06	1.24797e+07	1.51267e+07	1.27074e+07	-	-	-
Lcfn121162	0.980112	1.63e-10	-0.8562	4.63e-05	D-Ribulose 1,5-bisphosphate	Organic acids	Organic acids	C5H12O11P2	308.98	96.97	309.986	[M-H]-	3	24218-00-6	C01182	897161	1.01433e+06	889407	262428	267412	259174	219765	208374	205995	171377	193041	179734	43661.3	47749.5	45157.2	388759	374477	392686	ko00030,ko00630,ko00710,ko01100,ko01110,ko01200	C01182	-
Lcfp031603	0.876514	1.81e-05	-0.75676	0.00109115	N5-(4-Methoxybenzyl)glutamine	Amino acids and derivatives	Amino acids and derivatives	C13H18N2O4	267.13	121.06	266.127	[M+H]+	2	-	-	270448	258519	141084	132817	111089	68992.9	100996	98291.5	95265.3	79278.8	78166.9	114278	19598.7	18867.1	11162.8	48293.3	92576.7	81491.7	-	-	-
Lcsp001149	0.812429	0.000232905	-0.733573	0.0018546	Pro-Val-Thr	Amino acids and derivatives	Amino acids and derivatives	C14H25N3O5	316.19	70.07	315.179	[M+H]+	3	-	-	44809.2	52981.8	43964.9	29062.3	27653.2	20231	17052.6	24655.2	26909.4	16488.9	28816.8	12781.9	38757.1	19778	18237.6	27404.5	40336.4	15368.3	-	-	-
Lcsp011354	0.904158	3.74e-06	-0.855077	4.86e-05	1-amino-2,11-dihydroxyicosa-12,14-dien-3-one	Lipids	LPE	C20H37NO3	340.28	62.06	339.277	[M+H]+	2	-	-	106262	117277	88708.5	75469.8	72998.7	58135.5	44690.4	58871.7	45640.6	44593.6	55507.8	43542.9	49369.4	58691.4	53721.2	70889.5	83560	73293.4	-	-	-
Lcyp000688	0.984486	3.29e-11	-0.808251	0.00026588	Verecundin(Pinocembrin-5-glucoside)	Flavonoids	Flavanones	C21H22O9	419.13	257.08	418.126	[M+H]+	3	-	-	203138	186334	145144	47904.2	68916.6	50448.2	38493	31020.7	36402.2	35772	50123	55020.7	14602.1	3450.5	19682.7	85968.6	80794.4	68272.5	-	-	-
Lhzp110924	0.978676	2.56e-10	-0.868746	2.64e-05	9-O-demethyllycosinine B*	Alkaloids	Pyrrole alkaloids	C17H17NO3	284.13	147.04	283.121	[M+H]+	1	-	-	2.71393e+06	2.62489e+06	2.38002e+06	814187	1.06937e+06	981138	729989	789528	743857	615561	694971	683825	249368	249307	235292	1.24234e+06	1.16853e+06	1.21338e+06	-	-	-
Lman002731	0.939056	2.15e-07	-0.618156	0.0140441	Grevilloside F	Phenolic acids	Phenolic acids	C15H18O9	341.09	135.04	342.095	[M-H]-	2	1094004-50-8	-	3.6337e+06	3.66243e+06	4.09774e+06	1.45314e+06	1.8379e+06	1.56531e+06	1.54446e+06	1.60243e+06	1.61159e+06	1.92922e+06	2.41836e+06	2.2286e+06	1.64813e+06	1.79455e+06	1.84376e+06	2.35181e+06	2.72345e+06	2.67318e+06	-	-	-
Lmbn005662	0.926321	7.14e-07	-0.928222	6.05e-07	9(10)-EpOME	Lipids	Free fatty acids	C18H32O3	295.23	171.1	296.235	[M-H]-	1	16833-56-0	C14825	500458	529800	481405	365713	355978	351906	258231	248808	267338	228595	249873	254380	211558	229393	211695	312732	330863	318452	ko00591,ko01100	C14825	-
Lmbn005923	0.929209	5.54e-07	-0.797934	0.000363962	Crepenynate	Lipids	Free fatty acids	C18H30O2	277.22	59.01	278.225	[M-H]-	3	2277-31-8	C07289	85762	85098.9	72283.2	28550.9	23191.2	23838.9	37173.9	26176.8	28338	14723.4	22611.1	25511.6	32019.2	28616.2	30496.2	65276.5	52320.4	46285.7	ko00591	C07289	-
Lmbn006152	0.976188	5.22e-10	-0.892196	7.79e-06	Rumenic acid	Lipids	Free fatty acids	C18H32O2	279.23	59.01	280.24	[M-H]-	1	2540-56-9	C04056	37142.6	37016.6	35141.2	22905.9	23220.4	24120.9	20539.7	20995.9	21191.4	18997.2	20283.8	19850.9	19084.8	19017.1	19809.4	27983.9	29424.8	32877.6	ko00591	C04056	-
Lmcp000282	0.838041	9.58e-05	-0.698494	0.00377197	L-Carnitine	Alkaloids	Alkaloids	C7H15NO3	162.11	85.03	161.105	[M+H]+	3	541-15-1	C00318	1.05006e+07	1.05984e+07	8.80023e+06	4.28122e+06	8.24866e+06	5.78376e+06	5.27251e+06	5.90782e+06	4.69014e+06	3.41733e+06	5.26849e+06	7.91981e+06	5.48591e+06	5.76735e+06	3.42168e+06	4.35888e+06	6.21165e+06	4.9351e+06	-	C00318	-
Lmfp009701	0.867219	2.83e-05	-0.684892	0.00484317	Glycerol 9,11,13-octadecatrienoyl ester*	Lipids	Glycerol ester	C21H36O4	353.27	261.22	352.261	[M+H]+	1	-	-	1.25244e+06	1.28258e+06	999982	548438	473677	517717	429950	400770	381226	448440	437714	448618	669354	749372	693402	898440	965840	905163	-	-	-
Lmhp005872	0.87877	1.62e-05	-0.884544	1.19e-05	Diferuloylcadaverine	Alkaloids	Phenolamine	C25H30N2O6	455.22	177.05	454.21	[M+H]+	3	-	-	97304	80133.6	66033.1	56583.4	45315.6	58989.4	44503.7	34249.3	46215.6	33284.8	40635.5	26268.6	40146.4	32294.6	33923.9	62969.5	58996.6	55992.6	-	-	-
Lmhp008589	0.824665	0.000155019	-0.900224	4.8e-06	LysoPE 18:3(2n isomer)*	Lipids	LPE	C23H42NO7P	476.28	335.26	475.27	[M+H]+	1	-	-	801059	747638	553098	513884	548835	510299	384229	507514	442467	346942	342418	317741	427668	424516	352330	349127	494604	368518	-	-	-
Lmhp008688	0.804541	0.000298284	-0.832667	0.000116787	LysoPE 20:5	Lipids	LPE	C25H42NO7P	500.28	359.26	499.27	[M+H]+	2	-	-	61869.8	53209.6	27960.8	30433.8	26489.3	32724.1	18486.7	32209	19879.5	20094.5	13702.9	10504.5	15401.2	18265.1	16092.4	22874.3	31896.5	29087.8	-	-	-
Lmhp008801	0.837611	9.73e-05	-0.923315	9.19e-07	LysoPE 18:3*	Lipids	LPE	C23H42NO7P	476.28	335.26	475.27	[M+H]+	1	-	-	490166	602842	521648	367852	341201	348246	368782	298122	343913	275214	192566	236522	255813	310718	282858	237931	385245	273564	-	-	-
Lmhp008885	0.989378	2.84e-12	-0.764749	0.00089688	LysoPE 15:0(2n isomer)*	Lipids	LPE	C20H42NO7P	440.28	299.26	439.27	[M+H]+	2	-	-	1.2075e+06	1.10096e+06	954418	455594	501953	466924	430811	483402	415946	511179	481554	527290	375001	393587	395854	741795	668660	691439	-	-	-
Lmhp009129	0.859803	3.96e-05	-0.895291	6.49e-06	LysoPC 15:0(2n isomer)*	Lipids	LPC	C23H48NO7P	482.32	184.07	481.317	[M+H]+	1	-	-	343435	388802	294532	243589	219755	215174	84690.1	118118	113836	101030	84320.3	90772.7	127586	163695	135240	216972	206346	209881	-	-	-
Lmhp009187	0.985913	1.76e-11	-0.770098	0.000783243	LysoPE 15:0*	Lipids	LPE	C20H42NO7P	440.28	299.26	439.27	[M+H]+	2	-	-	1.21472e+06	1.1262e+06	973305	446780	474151	421902	406387	483336	379878	484037	473507	438750	396403	438338	377997	684127	672584	741678	-	-	-
Lmhp010514	0.829909	0.00012897	-0.715385	0.00271373	LysoPE 20:2(2n isomer)*	Lipids	LPE	C25H48NO7P	506.32	365.31	505.317	[M+H]+	3	-	-	58342.7	93758	61077.4	33850.5	41963.9	33836.2	33344.3	32448.6	50309.1	43190.9	37720.7	26197.9	32123.9	25981.8	19890.3	39277.2	27467.2	50856.1	-	-	-
Lmhp010515	0.850661	5.84e-05	-0.709727	0.00303763	LysoPC 17:0(2n isomer)*	Lipids	LPC	C25H52NO7P	510.36	184.07	509.348	[M+H]+	2	-	-	264865	255931	175982	136430	135912	135245	111049	118670	92992.5	91111.6	128273	106997	160861	146017	144427	166932	167695	182603	-	-	-
Lmhp010757	0.921143	1.1e-06	-0.607875	0.0162173	LysoPE 20:2*	Lipids	LPE	C25H48NO7P	506.32	365.31	505.317	[M+H]+	3	-	-	79685.2	94672.2	58124.2	28786.1	39760.8	33179.5	22195.2	35436.3	32191.4	43443	44506.8	47478.9	30106.6	24654.1	24918	57068.3	48097.4	52125.4	-	-	-
Lmhp011388	0.851783	5.57e-05	-0.656495	0.00785212	2-α-Linolenoyl-glycerol*	Lipids	Glycerol ester	C21H36O4	353.27	261.22	352.261	[M+H]+	1	55268-58-1	-	1.17944e+06	1.05413e+06	834863	457804	469213	437745	408058	340983	374888	395887	407608	432116	571556	702115	628522	821201	900761	822963	-	-	-
Lmhp011562	0.889817	8.92e-06	-0.704896	0.00333796	1-α-Linolenoyl-glycerol*	Lipids	Glycerol ester	C21H36O4	353.27	261.22	352.261	[M+H]+	1	-	-	1.13023e+06	1.10248e+06	917414	488680	486710	424916	372315	398919	365759	384179	442474	399070	603462	633237	606401	823922	848794	760913	-	-	-
Lmhp012042	0.896799	5.93e-06	-0.68318	0.00499347	2-Linoleoylglycerol*	Lipids	Glycerol ester	C21H38O4	355.28	263.24	354.277	[M+H]+	1	3443-82-1	-	283355	259136	211549	177722	162084	181749	105396	121114	88040.4	159190	157547	179471	90698.4	80317.3	87811.9	263476	241800	239611	-	-	-
Lmhp112042	0.934747	3.31e-07	-0.882068	1.36e-05	1-Linoleoylglycerol*	Lipids	Glycerol ester	C21H38O4	355.28	263.24	354.277	[M+H]+	1	2277-28-3	-	292203	316567	280134	195882	173922	157620	101098	101680	85622.3	114748	100496	95779.9	121239	121984	96068.3	194190	218247	192965	-	-	-
Lmmn000214	0.80375	0.000305595	-0.756117	0.00110815	Solatriose	Others	Saccharides	C18H32O15	487.17	341.11	488.174	[M-H]-	3	528-40-5	-	72125.2	58718.9	38670.3	21618.3	34802.7	23182.1	25845.3	14032.5	23704.5	10335.5	18281.7	12301.2	23866.4	18976	39600.9	38289	34433.1	30288.3	-	-	-
Lmqn000351	-0.864826	3.16e-05	0.732799	0.00188602	Rutinose	Others	Saccharides	C12H22O10	325.11	59.01	326.121	[M-H]-	3	90-74-4	C08247	680146	681381	699948	1.07472e+06	1.17265e+06	1.17649e+06	1.19625e+06	1.21425e+06	1.26763e+06	1.00331e+06	1.32427e+06	1.30823e+06	1.11271e+06	1.1139e+06	1.0461e+06	1.08545e+06	1.11402e+06	1.06613e+06	-	C08247	-
Lmqn009304	0.84656	6.89e-05	-0.802891	0.000313699	Eucalyptin (5-Hydroxy-7,4'-dimethoxy-6,8-dimethylflavone)	Flavonoids	Flavones	C19H18O5	325.11	293.08	326.115	[M-H]-	3	3122-88-1	-	29357.2	28613.7	20708.7	11334.3	20080.8	19297.8	10972.4	11029.3	8899.86	11584.9	9558.9	10444.4	8610.56	16862.3	11380.8	25206.9	31758.8	24018.2	-	-	-
Lmqp002784	0.872947	2.16e-05	-0.915858	1.65e-06	Salicylamide	Alkaloids	Alkaloids	C7H7NO2	138.06	77.04	137.048	[M+H]+	2	65-45-2	-	1.29713e+06	1.46213e+06	1.28455e+06	1.05182e+06	964709	917124	471279	507112	477259	486101	421145	521660	486215	356783	369757	701791	730805	523846	-	-	-
Lmsp010763	0.926303	7.15e-07	-0.68753	0.0046186	Monolinolenin*	Lipids	Glycerol ester	C21H36O4	353.27	261.22	352.261	[M+H]+	1	75685-85-7	-	343336	323425	229835	147973	192076	143876	131764	129858	127227	155297	151479	176280	152112	145348	173815	286566	322917	294875	-	-	-
Lmsp013116	0.912139	2.16e-06	-0.796868	0.000375592	Ent-16α,17-Dihydroxykauran-2-one	Terpenoids	Ditepenoids	C20H32O3	321.24	123.08	320.235	[M+H]+	1	-	-	9.84594e+06	1.18543e+07	8.67899e+06	6.66555e+06	5.74966e+06	5.59772e+06	1.44818e+06	1.46246e+06	1.18912e+06	2.73921e+06	3.83689e+06	4.34968e+06	1.47102e+06	1.5126e+06	1.55631e+06	5.74272e+06	5.8066e+06	5.89759e+06	-	-	-
Lmyn012331	0.920147	1.19e-06	-0.615286	0.0146265	(6Z)-Octadecenoic acid*	Lipids	Free fatty acids	C18H34O2	281.25	281.25	282.256	[M-H]-	1	593-39-5	C08363	1.70526e+06	1.68705e+06	1.45302e+06	879942	815135	865747	721220	723148	741471	885463	1.08589e+06	888639	971734	1.01901e+06	1.02424e+06	1.5204e+06	1.3607e+06	1.57554e+06	-	C08363	-
Lmyp003934	0.899868	4.91e-06	-0.82631	0.000146422	6-Pentadecylsalicylic acid	Phenolic acids	Phenolic acids	C22H36O3	349.27	123.08	348.266	[M+H]+	3	16611-84-0	C10759	206849	224545	191238	81444.6	86142.4	102019	39370.4	49556.2	45019.5	36423.3	42063.1	43828.2	76933.4	102540	85184.1	147519	142522	141727	-	C10759	-
Lsj214144	0.921355	1.08e-06	-0.631026	0.0116494	10-hydroxy-2-hydroxymethyl-1,4-anthraquinone*	Quinones	Anthraquinone	C15H10O4	255.06	240.04	254.058	[M+H]+	3	-	-	235053	213033	311967	39767.5	96890.7	79196.7	33180.6	41581.5	41093.9	96176.9	120552	117513	50333.6	50372.9	48728.3	143205	85372.7	84287.4	-	-	-
ML10181668	0.949246	6.7e-08	-0.801482	0.000327367	1-Aminocyclopentanecarboxylate*	Amino acids and derivatives	Amino acids and derivatives	C6H11NO2	130.09	84.08	129.079	[M+H]+	2	52-52-8	C03969	2.58279e+07	2.36932e+07	2.64848e+07	9.72413e+06	9.33929e+06	9.68063e+06	1.03346e+07	9.02926e+06	8.51533e+06	8.61518e+06	8.76786e+06	7.71877e+06	1.10468e+07	1.06526e+07	9.61953e+06	1.35902e+07	1.40668e+07	1.2422e+07	-	C03969	-
MW0012704	0.904721	3.6e-06	-0.789454	0.000465112	18-Hydroxy-5Z,8Z,11Z,14Z-eicosatetraenoic acid	Lipids	Free fatty acids	C20H32O3	321.24	123.08	320.235	[M+H]+	3	133268-58-3	-	9.69639e+06	1.13445e+07	8.21246e+06	6.67081e+06	5.5924e+06	5.69197e+06	1.35822e+06	1.45476e+06	1.17324e+06	2.73195e+06	3.93328e+06	4.26714e+06	1.44525e+06	1.56146e+06	1.55863e+06	5.51227e+06	5.41719e+06	5.5101e+06	-	-	-
mws0011	0.972962	1.18e-09	-0.746834	0.00137848	Syringin	Others	Alcohol compounds	C17H24O9	371.13	209.08	372.142	[M-H]-	2	118-34-3	C01533	1.75747e+06	1.57281e+06	1.38822e+06	571225	665599	594316	59412.4	82778.9	96027.5	474936	542432	565147	195356	162274	230029	713222	660540	794524	ko00940	C01533	MetMap153
mws0120	0.905728	3.37e-06	-0.950735	5.54e-08	sn-Glycero-3-phosphocholine	Lipids	PC	C8H20NO6P	258.11	104.11	257.103	[M+H]+	3	28319-77-9	C00670	1.22222e+07	1.27658e+07	1.33938e+07	7.85722e+06	7.59188e+06	7.49181e+06	4.19997e+06	3.75208e+06	4.04951e+06	2.85831e+06	2.92746e+06	2.92552e+06	2.87027e+06	2.67766e+06	3.06335e+06	6.27892e+06	6.39072e+06	6.6264e+06	ko00564,ko00565	C00670	-
mws0260	0.97214	1.43e-09	-0.87991	1.52e-05	L-Arginine	Amino acids and derivatives	Amino acids and derivatives	C6H14N4O2	175.12	116.07	174.112	[M+H]+	1	74-79-3	C00062	2.35122e+08	2.39945e+08	2.14745e+08	8.22158e+07	8.16714e+07	7.8252e+07	5.95743e+07	5.82284e+07	5.88553e+07	4.1605e+07	4.97708e+07	5.18774e+07	4.04771e+06	4.14356e+06	4.40547e+06	9.82412e+07	1.0231e+08	1.07109e+08	ko00220,ko00261,ko00330,ko00470,ko00970,ko01100,ko01110,ko01230,ko02010,ko04148	C00062	-
mws0366	0.903693	3.85e-06	-0.787438	0.000492247	(6Z,9Z,12Z)-Octadecatrienoic acid*	Lipids	Free fatty acids	C18H30O2	277.22	277.22	278.225	[M-H]-	2	506-26-3	C06426	4.09645e+07	4.17866e+07	3.33545e+07	1.36943e+07	1.32852e+07	1.18077e+07	2.04267e+07	1.43909e+07	1.41383e+07	7.24849e+06	1.19555e+07	1.2402e+07	1.70461e+07	1.58464e+07	1.62333e+07	3.2015e+07	2.5406e+07	2.44193e+07	ko00591,ko01040,ko01100	C06426	-
mws0367	0.912607	2.09e-06	-0.799684	0.000345514	(9Z,12Z,15Z)-Octadecatrienoic acid*	Lipids	Free fatty acids	C18H30O2	277.22	277.22	278.225	[M-H]-	2	463-40-1	C06427	3.55385e+07	3.51932e+07	2.97792e+07	1.20346e+07	1.13325e+07	1.02184e+07	1.68728e+07	1.24356e+07	1.20181e+07	6.16524e+06	9.94089e+06	1.04184e+07	1.45466e+07	1.38965e+07	1.31358e+07	2.82131e+07	2.1443e+07	2.0849e+07	ko00592,ko01040,ko01100,ko01110	C06427	-
MWS04412	0.937076	2.63e-07	-0.838054	9.57e-05	N(6),N(6)-Dimethyl-L-lysine	Amino acids and derivatives	Amino acids and derivatives	C8H18N2O2	175.12	70.07	174.137	[M+H]+	3	2259-86-1	-	719402	629513	708734	195777	220175	219493	297517	258208	247311	143774	203669	198067	12872.8	26200.7	12126.9	357380	388934	341193	-	-	-
MWS04447	0.981725	9.47e-11	-0.862649	3.49e-05	Homoproline	Amino acids and derivatives	Amino acids and derivatives	C6H11NO2	130.09	70.07	129.079	[M+H]+	3	535-75-1	-	7.49188e+06	7.61879e+06	6.26808e+06	2.21552e+06	2.19579e+06	2.30291e+06	1.90006e+06	2.0316e+06	1.88246e+06	1504820	1.48217e+06	1.5856e+06	840641	893593	711217	3.34096e+06	3.36316e+06	3.46426e+06	-	-	-
mws0866	0.895808	6.3e-06	-0.85128	5.69e-05	D-Glucose 6-phosphate*	Others	Saccharides	C6H13O9P	259.02	96.97	260.03	[M-H]-	1	56-73-5	C00092	1.88438e+06	2.07901e+06	1.84394e+06	1.30622e+06	1.40271e+06	1.3935e+06	1.38647e+06	1.33468e+06	1.21373e+06	1.13881e+06	1.20599e+06	1.16715e+06	1.49108e+06	1.29569e+06	1.23862e+06	1.58794e+06	1.40642e+06	1.75006e+06	ko00500,ko00562,ko01100,ko01110	C00092	-
mws0906	0.945592	1.04e-07	-0.658575	0.00759157	Coniferin	Others	Alcohol compounds	C16H22O8	341.12	179.07	342.132	[M-H]-	2	531-29-3	C00761	7.49295e+06	8.5032e+06	8.43418e+06	3.12356e+06	3.47515e+06	3.51409e+06	4.06187e+06	3.35871e+06	3.29223e+06	4.16775e+06	4.50539e+06	4.56538e+06	3.62812e+06	3.86083e+06	3.68895e+06	5.55819e+06	5.36581e+06	5.17598e+06	ko00940,ko01110	C00761	-
mws1038	0.929796	5.26e-07	-0.871248	2.34e-05	Pantetheine	Alkaloids	Alkaloids	C11H22N2O4S	277.12	146.08	278.13	[M-H]-	1	496-65-1	C00831	357184	313606	231655	151871	147007	143234	145603	118852	137069	84025.1	97253.8	103572	128467	89382.9	95500.3	144724	165374	120568	ko00770,ko01100,ko01110	C00831	-
mws1090	0.884931	1.17e-05	-0.837791	9.67e-05	D-Glucose 1-phosphate*	Others	Saccharides	C6H13O9P	259.02	96.97	260.03	[M-H]-	1	59-56-3	C00103	2.05936e+06	2.26287e+06	2.00475e+06	1.36464e+06	1.43742e+06	1.39573e+06	1.47677e+06	1.53735e+06	1.56572e+06	1.30487e+06	1.24876e+06	1.27649e+06	1.39853e+06	1.39133e+06	1.50415e+06	1.67631e+06	1.74174e+06	1.69018e+06	ko00010,ko00040,ko00052,ko00500,ko00520,ko00561,ko01100,ko01110,ko01240,ko01250	C00103	-
mws1336	0.846731	6.84e-05	-0.923226	9.26e-07	4-Aminobenzoate	Phenolic acids	Phenolic acids	C7H7NO2	138.06	120.04	137.048	[M+H]+	2	150-13-0	C00568	1.06861e+06	1.03851e+06	943359	714768	782423	862696	356183	399449	409914	353787	346871	368058	309336	309144	293836	744938	546659	595276	ko00790,ko01100,ko01240	C00568	-
MWS1848	0.856714	4.53e-05	-0.763439	0.000926646	Phenyl acetate*	Others	Others	C8H8O2	135.05	92.03	136.052	[M-H]-	3	122-79-2	C00548	310771	326378	271976	113313	135205	123122	111702	163197	113972	88255.6	76932	106772	189204	142840	167512	134946	149843	180471	-	C00548	-
MWS2027	0.865023	3.14e-05	-0.823599	0.000160811	Barbiturate	Nucleotides and derivatives	Nucleotides and derivatives	C4H4N2O3	129.03	69	128.022	[M+H]+	3	67-52-7	C00813	574022	566424	562252	272831	201912	314038	141209	136333	169429	192747	66185.6	101194	309383	187478	274842	325116	315910	234901	ko00240,ko01100	C00813	-
mws2101	0.914102	1.88e-06	-0.686025	0.00474565	Deoxyrhapontin	Others	Stilbene	C21H24O8	405.15	243.1	404.147	[M+H]+	1	30197-14-9	-	341217	272800	260555	158987	143109	170917	80100.6	89007.6	92097.2	142707	164905	185949	45794.2	32997.3	23553.1	146019	140229	159129	-	CM02306	MetMap152
mws2623	0.910894	2.36e-06	-0.640147	0.010154	cis-Vaccenic acid*	Lipids	Free fatty acids	C18H34O2	281.25	281.25	282.256	[M-H]-	1	506-17-2	C21944	1.67797e+06	1.67423e+06	1.44817e+06	885433	805167	857835	699316	711602	738436	853486	936509	899284	1.00349e+06	1.01903e+06	1.04747e+06	1.5635e+06	1.34279e+06	1.58413e+06	-	C21944	-
MWS2673	0.899646	4.98e-06	-0.851087	5.73e-05	5,6-DHET	Lipids	Free fatty acids	C20H34O4	339.25	121.1	338.246	[M+H]+	3	213382-49-1	C14772	550499	660506	622070	404678	405516	343678	102665	110839	147630	185983	249681	157908	160241	169917	127245	502066	468243	512861	ko00590,ko01100	C14772	-
mws4052	0.809441	0.000256127	-0.884591	1.19e-05	1-Aminocyclopropane-1-carboxylate	Amino acids and derivatives	Amino acids and derivatives	C4H7NO2	102.06	56.05	101.048	[M+H]+	3	22059-21-8	C01234	692573	642404	680937	516506	560303	549855	375348	388328	380667	391104	354749	318495	475340	469196	420679	429489	514375	475469	ko00270,ko01100,ko01110	C01234	-
MWS4471	0.924183	8.55e-07	-0.891712	8.01e-06	N-Alpha-Acetyl-L-Asparagine	Amino acids and derivatives	Amino acids and derivatives	C6H10N2O4	173.06	58.03	174.064	[M-H]-	2	4033-40-3	-	107415	81534.5	70000.9	21773.4	27114.2	19000.3	32005.4	14978.9	28185.2	2995.78	2995.78	2995.78	2995.78	2995.78	2995.78	29979.5	35263.4	39113.4	-	-	-
MWSHY0054	-0.815511	0.00021079	0.733101	0.00187368	Eupatorin; 3',5-Dihydroxy-4',6,7-Trimethoxyflavone*	Flavonoids	Flavones	C18H16O7	345.1	312.06	344.09	[M+H]+	1	855-96-9	-	5.52336e+06	5.06687e+06	4.02317e+06	7.33724e+06	8.81229e+06	1.12797e+07	8.91713e+06	7.5002e+06	9.76543e+06	1.02046e+07	7.96177e+06	1.08917e+07	8.65503e+06	1.03996e+07	9.27927e+06	1.02573e+07	9.60112e+06	8.71822e+06	-	-	-
MWSHY0112	0.916621	1.56e-06	-0.850801	5.8e-05	Xanthohumol	Flavonoids	Chalcones	C21H22O5	355.15	179.04	354.147	[M+H]+	3	6754-58-1	C16417	1.45439e+06	1.32572e+06	1.27526e+06	860937	919570	822841	311172	323763	251375	344794	597407	462154	408499	325851	356434	1.01267e+06	1.05769e+06	970009	ko00941	C16417	-
MWSmce057	0.959258	1.64e-08	-0.63346	0.0112346	Alizarin*	Quinones	Anthraquinone	C14H8O4	239.04	211.04	240.042	[M-H]-	1	72-48-0	C01474	206681	222223	208110	62458.8	78005.7	72363.9	33117.5	45262.1	59056.6	99418.9	111646	100859	62142.8	76084.7	39378.7	146504	147292	128927	-	C01474	-
MWSmce089	0.98251	7.13e-11	-0.853474	5.19e-05	N-p-Coumaroyltyramine*	Alkaloids	Phenolamine	C17H17NO3	284.12	147.04	283.121	[M+H]+	1	36417-86-4	-	2.55061e+06	2.64161e+06	2.37216e+06	827054	960571	952057	701905	727478	715768	640054	732511	738824	248635	306087	200785	1.24683e+06	1.26887e+06	1.0907e+06	-	-	-
MWSmce466	0.811554	0.000239517	-0.703661	0.00341843	4'-Hydroxyacetophenone*	Others	Ketone compounds	C8H8O2	135.05	92.03	136.052	[M-H]-	3	99-93-4	C10700	293480	315561	293329	98253.6	110789	135219	101363	165244	92351.1	95645.1	62396.4	109332	206131	139414	181808	167324	168332	162512	ko01100	C10700	MetMap164
MWSmce471	0.82673	0.000144292	-0.649283	0.00881081	Fagomine	Alkaloids	Piperidine alkaloids	C6H13NO3	148.1	86.06	147.089	[M+H]+	3	53185-12-9	C10144	113049	109218	74215.1	77870.3	52998.8	44711.2	71291.6	57222.9	50176.2	46878.9	64870.5	73519.7	42820.2	40953.1	20820.4	61651.9	61705.5	70977.2	-	C10144	-
MWSmce507	0.948391	7.45e-08	-0.775146	0.000686998	Mulberroside A	Phenolic acids	Phenolic acids	C26H32O14	567.17	243.07	568.179	[M-H]-	2	102841-42-9	-	63227.7	54464.3	59814.5	9289.98	17851.5	18403.7	8791.52	26094.9	12995.8	11641.5	11905.8	26705.9	1758.3	1758.3	1758.3	31678.1	19768.2	16583.6	-	-	-
MWSmce582	0.811712	0.000238315	-0.66856	0.00643326	Methyl L-pyroglutamate	Amino acids and derivatives	Amino acids and derivatives	C6H9NO3	144.07	84.04	143.058	[M+H]+	3	4931-66-2	-	96900	78657.4	66414.4	44564.5	69918.7	39576.6	55162.5	41217.4	12395.6	51857.6	38650.8	40713.9	48230.3	32478.1	26800.1	38688.1	47164.7	48701.3	-	-	-
MWSmce698	0.872243	2.23e-05	-0.843828	7.67e-05	2',4'-Dimethylacetophenone	Others	Ketone compounds	C10H12O	149.1	65.04	148.089	[M+H]+	3	89-74-7	-	901606	734996	801793	700355	592978	609911	409878	559662	437943	376167	542570	518388	459833	412398	455549	230924	418878	274825	-	-	-
MWSslk216	0.877386	1.73e-05	-0.623857	0.0129403	Sibiricose A5*	Phenolic acids	Phenolic acids	C22H30O14	517.16	175.04	518.164	[M-H]-	1	107912-97-0	-	200663	247128	190192	78361.9	88166.7	89644.9	119008	133589	126326	110319	125351	119089	122641	94085.2	94028.8	150990	158546	147199	-	CM02695	MetMap165
MWStz085	0.961244	1.19e-08	-0.618681	0.0139395	Aurantiamide	Alkaloids	Alkaloids	C25H26N2O3	403.2	117.07	402.194	[M+H]+	1	58115-31-4	-	127641	110467	93815.1	1514.24	1514.24	1514.24	1514.24	1514.24	1514.24	27849.8	34125.8	28114.6	11652.5	15597.7	7571.18	38707.9	35176.2	37190.2	-	-	-
MWStz661	0.898563	5.33e-06	-0.789523	0.000464208	Neocnidilide*	Others	Lactones	C12H18O2	195.14	79.05	194.131	[M+H]+	2	4567-33-3	C17002	130548	118773	75339.5	77116.1	60656.3	65501.9	49301.1	49774	37752.8	44797.2	52979.7	51841.3	48317.3	48145.8	22671.4	67246.2	76610.1	66004.6	-	C17002	-
NK10246260	0.882941	1.3e-05	-0.751983	0.00122266	4-Hydroxy-2-quinolone	Alkaloids	Quinoline alkaloids	C9H7NO2	162.06	116.05	161.048	[M+H]+	3	86-95-3	C16716	430219	408045	303700	176427	75091.8	104582	160664	220513	142588	121482	107473	106105	205492	71990.2	96179.7	159928	194758	137149	-	C16716	-
PD0203720	0.93453	3.38e-07	-0.807181	0.000274915	4-Ethyl-L-glutamic acid	Amino acids and derivatives	Amino acids and derivatives	C7H13NO4	176.09	130.09	175.084	[M+H]+	3	20913-68-2	-	453066	458985	397877	178595	209873	178314	246103	228490	204580	204341	151774	191422	186571	110267	190441	258009	335923	225177	-	-	-
PD0590872	0.978775	2.49e-10	-0.762779	0.000941941	1-(4-hydroxy-3-methoxyphenyl)oct-7-en-3-one	Others	Others	C15H20O3	249.15	137.06	248.141	[M+H]+	1	748159-46-8	-	2.93607e+06	2.45538e+06	2.61724e+06	1.0799e+06	1.12953e+06	919613	577635	663666	811792	1.27636e+06	1.03612e+06	944236	376233	598029	392138	2.76569e+06	2.98496e+06	2.83297e+06	-	-	-
PD0619170	0.9049	3.56e-06	-0.874158	2.04e-05	4-(1,2,4a,5-tetramethyl-2,3,4,7,8,8a-hexahydronaphthalen-1-yl)butan-2-one	Terpenoids	Sesquiterpenoids	C18H30O	263.24	95.09	262.23	[M+H]+	1	-	-	1.12869e+06	1.15143e+06	909242	690558	752198	659695	469283	465211	430939	474776	366608	501792	451511	580628	529041	918038	914669	818582	-	-	-
PD0623931	-0.863876	3.3e-05	0.784429	0.000535132	Funatrol C	Terpenoids	Sesquiterpenoids	C15H24O2	237.18	161.13	236.178	[M+H]+	1	-	-	19036.8	14980.6	2996.13	32031.9	43639.2	55813.8	44429.7	53565.1	35672	51161.4	38938	54258.1	56476.5	54911	50853.8	25945.5	29576.3	32832.1	-	-	-
PD0702877	0.912903	2.05e-06	-0.770104	0.000783122	Menthadienyl acetate	Terpenoids	Monoterpenoids	C12H18O2	195.14	93.07	194.131	[M+H]+	2	71660-03-2	-	417048	386583	279990	223134	228223	221896	181014	163798	192027	212646	201848	191962	114886	123531	70487.5	245397	273404	201389	-	-	-
PDP001335	0.974676	7.76e-10	-0.757318	0.00107655	4-hydroxy-3-methoxy-pentyl ester benzenepropanoic acid	Phenolic acids	Phenolic acids	C15H22O4	267.16	137.06	266.152	[M+H]+	2	-	-	1.80864e+06	1.70752e+06	1.47248e+06	629196	676064	663240	393541	437395	515117	901191	557710	601428	265658	397262	270424	1.94689e+06	1.85825e+06	1.83607e+06	-	-	-
PDP004301	-0.806938	0.000277	0.878494	1.64e-05	Nevadensin 7-glucoside*	Flavonoids	Flavones	C24H26O12	507.15	345.1	506.142	[M+H]+	1	-	-	261970	345310	257735	588782	534704	421611	860841	576249	633593	896914	647378	792122	817074	823108	656497	591639	578806	652704	-	-	-
PDP005932	0.891233	8.23e-06	-0.625179	0.0126944	Dihydrodaidzin	Flavonoids	Flavanones	C21H22O9	419.13	257.08	418.126	[M+H]+	1	121927-96-6	-	628958	516095	542924	418229	82419.3	86025.2	92757.1	107060	137837	243473	319315	259864	16483.9	16483.9	16483.9	225003	265346	198817	-	-	-
PDP008486	-0.92068	1.14e-06	0.808398	0.000264659	Dehydrocarissone	Others	Others	C14H20O2	221.15	119.08	220.146	[M+H]+	3	64057-46-1	-	175265	195476	158155	493559	497142	473384	425086	457851	418583	518261	473083	513098	464838	517044	444813	300019	402536	364434	-	-	-
PDP010679	0.916991	1.51e-06	-0.933665	3.67e-07	N2-(2-Hydroxysuccinoyl)arginine	Amino acids and derivatives	Amino acids and derivatives	C10H18N4O6	291.13	175.12	290.123	[M+H]+	3	87605-92-3	-	903620	1.11104e+06	848446	464114	414129	486807	321839	364667	354389	149984	207320	172889	111759	115244	71454	500406	562292	503266	-	-	-
PDP053473	0.909857	2.54e-06	-0.698612	0.00376357	Phomodiol	Terpenoids	Sesquiterpenoids	C16H26O3	267.19	107.08	266.188	[M+H]+	3	-	-	54745.6	52651	23812.7	6651.23	20214.2	17404.6	3984.7	12992.7	10765.7	13071.9	20126.9	12938.8	796.941	796.941	796.941	21423.5	39996.5	31713	-	-	-
PDP060499	0.969942	2.34e-09	-0.810786	0.000245449	Phosphatidylcholine lyso 15:0*	Lipids	LPC	C23H48NO7P	482.33	184.07	481.317	[M+H]+	1	17364-10-2	-	2.02402e+06	1.92522e+06	1.5279e+06	886687	949946	994156	871492	1.05869e+06	758009	841118	866705	899141	746501	797517	700155	1.14962e+06	1.11985e+06	1.17605e+06	-	-	-
PDP062869	0.844516	7.47e-05	-0.69652	0.00391445	Tilarginine Acetate	Amino acids and derivatives	Amino acids and derivatives	C7H16N4O2.C2H4O2	189.13	70.06	188.127	[M+H]+	2	-	-	7.56454e+06	7.24447e+06	6.78286e+06	3.67369e+06	3.8908e+06	3.53249e+06	4.18306e+06	3.97065e+06	4.21947e+06	2.95769e+06	4.79853e+06	4.70336e+06	771531	719785	740283	3.96615e+06	4.44495e+06	3.8558e+06	-	-	-
PDP085922	0.894264	6.9e-06	-0.849902	6.02e-05	2-[(5E,8E)-tetradeca-5,8-dien-1-yl]cyclobutan-1-one	Lipids	Free fatty acids	C18H30O	263.24	95.08	262.23	[M+H]+	3	-	-	1.1116e+06	1.12087e+06	955606	681568	773977	793702	370377	450779	551071	476339	505503	525026	577911	613896	481469	827472	965378	891284	-	-	-
PDP115321	0.885072	1.16e-05	-0.853466	5.2e-05	3-Pyrrolidine carboxylic acid*	Amino acids and derivatives	Amino acids and derivatives	C5H9NO2	116.07	70.07	115.063	[M+H]+	1	-	-	2.61756e+07	2.60569e+07	2.40775e+07	1.80605e+07	1.74126e+07	1.68568e+07	1.56287e+07	1.62737e+07	1.70974e+07	1.44173e+07	1.44076e+07	1.51241e+07	9.00349e+06	8.92678e+06	8.07221e+06	1.67694e+07	1.88713e+07	1.81123e+07	-	-	-
PDP123169	0.984823	2.85e-11	-0.858499	4.19e-05	2-(4-Hydroxy-6-methoxyphenanthren-3-yl)oxy-6-(hydroxymethyl)oxane-3,4,5-triol	Others	Others	C21H22O8	403.14	241.09	402.132	[M+H]+	3	-	-	1.96537e+06	1.7804e+06	1.67093e+06	578170	702036	600922	248891	199102	228798	343536	362959	324219	46632.5	26030.6	46414.1	561156	698677	555665	-	-	-
PDP136747	0.83128	0.00012279	-0.939817	1.98e-07	3-amino-4-methyloxetan-2-one*	Alkaloids	Alkaloids	C4H7NO2	102.06	56.05	101.048	[M+H]+	3	-	-	1.91572e+06	1.9206e+06	2.00605e+06	1.53155e+06	1.47953e+06	1.46046e+06	1.31153e+06	1.38001e+06	1.30435e+06	1.12169e+06	1.0681e+06	1.02544e+06	1.39439e+06	1.39633e+06	1.28246e+06	1.3929e+06	1.46044e+06	1.41409e+06	-	-	-
PDP221612	0.956266	2.59e-08	-0.619786	0.0137215	Phosphatidylethanolamine lyso 17:0	Lipids	LPE	C22H46NO7P	468.33	327.29	467.301	[M+H]+	3	-	-	976133	1.00221e+06	814961	457910	424367	471967	311263	446143	344266	580564	601107	530670	357554	409879	424297	654874	588351	742107	-	-	-
PDP226107	-0.89369	7.14e-06	0.88219	1.35e-05	3-(3-{[(2s,3r,4s,5s,6r)-6-({[(2s,3r,4r,5s)-3,4-dihydroxy-5-(hydroxymethyl)oxolan-2-yl]methoxy}methyl)-3,4,5-trihydroxyoxan-2-yl]oxy}-4,5-dimethoxyphenyl)-5-hydroxy-7-methoxychromen-4-one*	Flavonoids	Flavones	C30H36O16	653.2	345.1	652.2	[M+H]+	1	-	-	3.8446e+06	3.63507e+06	3.72814e+06	6.488e+06	7.86751e+06	7.48921e+06	7.78663e+06	7.9581e+06	8.71625e+06	8.5256e+06	8.80368e+06	9.65176e+06	8.04037e+06	7.93082e+06	7.31502e+06	7.53881e+06	7.08516e+06	6.38375e+06	-	-	-
PDP227507	-0.803629	0.000306728	0.685846	0.00476097	seiricardine A*	Terpenoids	Sesquiterpenoids	C15H26O2	239.2	95.09	238.193	[M+H]+	1	-	-	35503.4	30440.4	27936.8	75815.5	49237.2	63393.6	48335.6	65815.3	64011.7	56606.7	54387.8	77836.7	62666	71224.9	59524.3	52541.7	52697.6	61543.4	-	-	-
PDP239475	0.915235	1.73e-06	-0.739221	0.00163787	Phosphatidylcholine lyso 18:2*	Lipids	LPC	C26H50NO7P	520.34	184.07	519.332	[M+H]+	1	-	-	3.31019e+07	3.37208e+07	2.78597e+07	2.11807e+07	2.13352e+07	1.91458e+07	1.98172e+07	2.59027e+07	1.90186e+07	1.90318e+07	2.14115e+07	2.17771e+07	1.88513e+07	2.10643e+07	1.74195e+07	2.55353e+07	2.43374e+07	2.55184e+07	-	-	-
PDP239698	0.85393	5.1e-05	-0.662178	0.0071561	Feruloyl lysine*	Alkaloids	Phenolamine	C16H22N2O5	323.17	177.05	322.153	[M+H]+	3	-	-	495033	342642	275129	163605	293654	165823	88492.5	108274	111555	194808	276506	78424.4	81327.5	88069.4	47560.9	181967	146640	159988	-	-	-
PDP247301	0.838772	9.32e-05	-0.68167	0.00512911	6-acetamido-3-aminohexanoic acid	Alkaloids	Alkaloids	C8H16N2O3	189.12	70.07	188.116	[M+H]+	2	-	-	7.01541e+06	6.90584e+06	7.09089e+06	3.55744e+06	3.45535e+06	3.44215e+06	4.38391e+06	3.68531e+06	3.85303e+06	2.85721e+06	4.68645e+06	4.74996e+06	737002	812613	658349	3.79374e+06	4.21185e+06	3.89681e+06	-	-	-
PDP266736	0.973853	9.54e-10	-0.845527	7.18e-05	chrysophanol 1-o-beta-d-(6'-o-malonyl)glucoside	Quinones	Anthraquinone	C24H22O12	503.12	255.07	502.111	[M+H]+	1	-	-	2.0861e+06	1.82102e+06	1.52103e+06	720298	734645	786690	309631	304805	343591	461784	508528	427241	72413.9	69314	59844.9	785663	767178	819399	-	-	-
PDP286004	0.944588	1.17e-07	-0.806598	0.000279941	(5R)-5-(methylaminomethyl)oxolan-2-one*	Alkaloids	Alkaloids	C6H11NO2	130.1	84.08	129.079	[M+H]+	2	-	-	2.64898e+07	2.29572e+07	2.66422e+07	1.00522e+07	8.61905e+06	9.45906e+06	9.65942e+06	1.06872e+07	8.87885e+06	8.27419e+06	8.28947e+06	7.78795e+06	1.06876e+07	1.00597e+07	9.93258e+06	1.41309e+07	1.40605e+07	1.30093e+07	-	-	-
PDP295094	0.924507	8.33e-07	-0.878274	1.66e-05	(8E,10E,14E)-5,12-dihydroxyicosa-8,10,14-trienoic acid	Lipids	Free fatty acids	C20H34O4	339.25	321.24	338.246	[M+H]+	3	-	-	3.27448e+06	3.16038e+06	2.73848e+06	1.71275e+06	2.04746e+06	1.72596e+06	564514	563668	603066	715801	945971	814095	729720	668898	684856	2.47495e+06	2.41854e+06	2.33642e+06	-	-	-
pmb0492	0.893471	7.23e-06	-0.784101	0.000539983	N',N'',N'''-p-Coumaroyl-cinnamoyl-caffeoyl spermidine	Alkaloids	Phenolamine	C34H37N3O6	584.28	325	583.268	[M+H]+	3	-	-	574593	666551	498995	246755	270149	230374	193360	241295	268060	226940	171453	188477	193357	382737	142131	214670	373471	153401	-	-	-
pmb0501	0.802162	0.000320711	-0.65364	0.00822128	Agmatine	Alkaloids	Alkaloids	C5H14N4	131.13	114.1	130.122	[M+H]+	3	306-60-5	C00179	94471.1	135115	184016	97523.3	70296.9	30958.8	62490.2	34791.6	50542.4	51623.4	71755.2	85091.6	28307.4	29495.1	28012	79165.5	88847.9	67029.2	ko00330,ko00999,ko01100,ko01110	C00179	-
pmb0530	0.82669	0.000144493	-0.74942	0.00129836	NAD+	Nucleotides and derivatives	Nucleotides and derivatives	C21H27N7O14P2	664.12	136.06	663.109	[M+H]+	1	53-84-9	C00003	871513	701813	519277	452694	576610	426871	444204	278127	402330	309505	512533	336178	196952	184072	214207	371686	360498	259621	ko00190,ko00730,ko00760,ko01100,ko01240,ko04148	C00003	-
pmb0864	0.867153	2.84e-05	-0.776091	0.000670109	LysoPE 14:0*	Lipids	LPE	C19H40NO7P	426.26	285.24	425.254	[M+H]+	3	-	-	81405.6	69605	40256.4	33318.8	37817.1	29590.4	29935.7	40665.5	32506	28983.3	30302.8	22204.1	22599.7	13014.1	20327.1	40105.9	36994.6	30393.5	-	-	-
pmb0874	0.879568	1.55e-05	-0.908296	2.83e-06	LysoPE 18:2(2n isomer)*	Lipids	LPE	C23H44NO7P	478.29	337.27	477.286	[M+H]+	1	-	-	2.72181e+07	2.45503e+07	2.2721e+07	1.815e+07	2.08901e+07	1.74597e+07	1.37418e+07	1.20515e+07	1.23339e+07	1.14597e+07	1.20378e+07	1.2456e+07	1.27928e+07	1.40577e+07	1.33328e+07	1.98367e+07	1.95237e+07	1.88107e+07	-	-	-
pmb0876	0.928422	5.95e-07	-0.649932	0.00872102	LysoPE 16:0*	Lipids	LPE	C21H44NO7P	454.29	313.27	453.286	[M+H]+	1	53862-35-4	-	2.34308e+07	2.08589e+07	1.72031e+07	1.0597e+07	1.06389e+07	1.06279e+07	1.12302e+07	1.32688e+07	1.12153e+07	1.2655e+07	1.36933e+07	1.35582e+07	7.6424e+06	8.79873e+06	7.98182e+06	1.63637e+07	1.53971e+07	1.56945e+07	-	-	-
pmb0881	0.954839	3.18e-08	-0.756366	0.00110154	LysoPE 18:2*	Lipids	LPE	C23H44NO7P	478.29	337.27	477.286	[M+H]+	1	-	-	1.25146e+07	1.08875e+07	9.69877e+06	6.62121e+06	6.55878e+06	7.32048e+06	5.86157e+06	7.62731e+06	5.8039e+06	6.05988e+06	6.83175e+06	7.39601e+06	5.66946e+06	6.33283e+06	5.57252e+06	9.09228e+06	9.07823e+06	9.41918e+06	-	-	-
pmb0883	0.903677	3.85e-06	-0.684252	0.00489896	1-Octadecanoyl-sn-glycero-3-phosphoethanolamine	Lipids	LPE	C23H48NO7P	482.32	341.31	481.317	[M+H]+	3	69747-55-3	C21484	307546	245912	230461	163927	197843	159322	133303	170402	137226	192426	159181	185352	107267	114107	128008	243000	214243	234228	-	C21484	-
pmb2319	0.922274	1e-06	-0.903937	3.79e-06	LysoPC 15:0*	Lipids	LPC	C23H48NO7P	482.32	184.07	481.317	[M+H]+	1	108273-89-8	-	214956	214131	186867	121977	128917	108838	49777.2	59335.8	48329.9	55185.6	58493	41674.6	66573	66576	62604	89547.7	127129	119313	-	-	-
pmb2406	0.929504	5.4e-07	-0.641155	0.0099984	LysoPC 17:0*	Lipids	LPC	C25H52NO7P	510.36	184.07	509.348	[M+H]+	2	50930-23-9	-	2.08622e+06	2.06455e+06	1.55728e+06	1.17609e+06	1.1611e+06	1.23429e+06	1.00346e+06	1.17791e+06	985600	1.2279e+06	1.39434e+06	1.40201e+06	820853	961082	873761	1.57679e+06	1.53151e+06	1.49345e+06	-	-	-
pmb2799	0.844542	7.46e-05	-0.891685	8.02e-06	12(13)-EpOME	Lipids	Free fatty acids	C18H32O3	295.23	195.14	296.235	[M-H]-	1	6799-85-5	C14826	67028.5	71741.7	60137.1	52067.9	56753.1	51357.4	34556.3	41624.7	40727.4	27476.9	39733.3	41726.9	31419.4	40839.9	32844.7	43555.8	52938.8	53393.9	ko00591,ko01100	C14826	-
pmc0274	0.955728	2.8e-08	-0.782497	0.000564235	6-Methylmercaptopurine	Nucleotides and derivatives	Nucleotides and derivatives	C6H6N4S	167.04	125	166.031	[M+H]+	3	50-66-8	C16614	27033.9	36851.8	33690.4	2550.4	2550.4	2550.4	2550.4	2550.4	2550.4	2550.4	2550.4	2550.4	2550.4	2550.4	2550.4	12752	16300.8	17204.4	-	C16614	-
pmd0160	0.947427	8.38e-08	-0.680622	0.00522493	LysoPE 16:0(2n isomer)*	Lipids	LPE	C21H44NO7P	454.29	313.27	453.286	[M+H]+	1	-	-	2.31857e+07	2.2503e+07	1.85396e+07	1.12286e+07	1.11916e+07	1.10376e+07	1.17508e+07	1.3379e+07	1.08113e+07	1.3387e+07	1.3426e+07	1.3774e+07	8.00623e+06	9.27269e+06	8.02134e+06	1.74987e+07	1.5075e+07	1.5345e+07	-	-	-
pme0008	0.976036	5.44e-10	-0.847504	6.63e-05	L-Citrulline	Amino acids and derivatives	Amino acids and derivatives	C6H13N3O3	176.1	113.07	175.096	[M+H]+	3	372-75-8	C00327	3.69491e+06	3.06842e+06	3.33422e+06	1.07608e+06	625300	999025	907080	719968	721997	583903	637645	721190	107564	120232	85106.2	1.34962e+06	1.54639e+06	1.30379e+06	ko00220,ko01100,ko01110,ko01230	C00327	-
pme0026	0.970329	2.15e-09	-0.862938	3.45e-05	L-Lysine	Amino acids and derivatives	Amino acids and derivatives	C6H14N2O2	147.11	84.08	146.106	[M+H]+	3	56-87-1	C00047	4.09002e+07	4.31276e+07	4.33149e+07	1.56689e+07	1.62337e+07	1.47888e+07	1.47926e+07	1.37304e+07	1.24024e+07	1.21611e+07	1.1936e+07	1.15005e+07	4.65045e+06	4.33199e+06	4.62062e+06	1.86934e+07	2.12235e+07	2.02951e+07	ko00300,ko00310,ko00470,ko00780,ko00960,ko00970,ko01100,ko01110,ko01210,ko01230,ko02010	C00047	-
pme0193	0.96436	6.98e-09	-0.868638	2.65e-05	L-Glutamine*	Amino acids and derivatives	Amino acids and derivatives	C5H10N2O3	147.08	84.04	146.069	[M+H]+	3	56-85-9	C00064	3.72664e+07	4.09412e+07	4.0841e+07	1.45497e+07	1.57946e+07	1.4114e+07	1.44103e+07	1.23808e+07	1.23626e+07	1.09629e+07	1.09001e+07	1.08074e+07	4.43325e+06	4.16866e+06	4.40372e+06	1.80113e+07	1.85215e+07	1.84509e+07	ko00220,ko00230,ko00240,ko00250,ko00470,ko00630,ko00750,ko00910,ko00970,ko01100,ko01230,ko01232,ko01240,ko02010	C00064	-
pme1194	0.815533	0.000210638	-0.839488	9.07e-05	Deoxycytidine	Nucleotides and derivatives	Nucleotides and derivatives	C9H13N3O4	228.1	112.05	227.091	[M+H]+	3	951-77-9	C00881	189300	149784	145088	99008.8	92555	106234	93961.9	76371.1	73587.4	38209.2	47223.8	85596.5	107152	83023.6	89705.1	67899.8	114118	92320.3	ko00240,ko01100,ko01232,ko02010	C00881	-
pme1936	0.865803	3.03e-05	-0.741832	0.00154484	Creatinine	Alkaloids	Alkaloids	C4H7N3O	114.07	86.07	113.059	[M+H]+	3	60-27-5	C00791	618163	521839	460700	368615	312565	293867	318648	270282	258538	337626	279348	305856	73327.9	109171	88877.3	302165	305204	303647	ko00330,ko01100	C00791	-
pme2596	0.934761	3.31e-07	-0.773775	0.000712136	4-Pyridoxate	Others	Vitamin	C8H9NO4	184.06	148.04	183.053	[M+H]+	3	82-82-6	C00847	367292	349740	300116	209566	184236	150068	200435	184776	165476	207469	179485	164807	85322.3	131531	118830	214766	203639	194143	ko00750,ko01100	C00847	-
pme2693	0.892211	7.78e-06	-0.797684	0.000366665	N-Acetylputrescine	Alkaloids	Alkaloids	C6H14N2O	131.12	114.09	130.111	[M+H]+	3	18233-70-0	C02714	137235	135615	125635	51936.6	68510.5	78111.9	65373.5	53210.6	86597	49742.3	64852.1	67921.5	17009.4	26301.6	19300.3	85130.3	50834.2	54273.3	ko00330,ko01100	C02714	-
pme2768	0.936636	2.75e-07	-0.804385	0.000299712	PQQ	Alkaloids	Quinoline alkaloids	C14H6N2O8	329.01	241.02	330.012	[M-H]-	3	72909-34-3	C00113	519115	706584	684120	119080	122308	128805	119349	96676.7	130415	68606.8	105373	73781	143321	126083	118804	213400	266691	292739	-	C00113	-
pme3388	0.838626	9.37e-05	-0.646811	0.00915969	Homoarginine	Amino acids and derivatives	Amino acids and derivatives	C7H16N4O2	189.13	144.1	188.127	[M+H]+	2	156-86-5	C01924	2.81892e+06	2.46407e+06	2.6264e+06	1.38583e+06	1.36349e+06	1.40362e+06	1.70015e+06	1.67943e+06	1.69452e+06	1.32387e+06	1.94559e+06	1.89178e+06	554479	713746	690061	1.69024e+06	1.60311e+06	1.59781e+06	-	C01924	-
pmn001420	0.944255	1.22e-07	-0.616913	0.0142941	1-Caffeoyl-beta-D-glucose*	Phenolic acids	Phenolic acids	C15H18O9	341.09	179.04	342.095	[M-H]-	1	14364-08-0	C10433	8.43748e+06	8.26506e+06	8.45681e+06	3.22591e+06	3.63683e+06	3.59904e+06	3.9766e+06	3.83307e+06	3.14309e+06	4.98136e+06	4.7114e+06	4.6289e+06	3.99671e+06	4.36864e+06	4.05239e+06	5.46797e+06	5.08079e+06	5.32065e+06	-	C10433	MetMap166,MetMap168,MetMap169
pmn001523	-0.863966	3.29e-05	0.634293	0.0110952	Trigallic acid	Phenolic acids	Phenolic acids	C21H14O13	473.04	169.01	474.043	[M-H]-	3	2131-66-0	-	2.28209e+06	2.50565e+06	2.65975e+06	3.76454e+06	3.46882e+06	3.9374e+06	3.54646e+06	3.20347e+06	3.38255e+06	3.46947e+06	3.25208e+06	3.79669e+06	3.38302e+06	3.53937e+06	3.43252e+06	3.20939e+06	3.27432e+06	3.38237e+06	-	-	-
pmn001610	0.897528	5.68e-06	-0.700878	0.0036054	Icosadienoic acid*	Lipids	Free fatty acids	C20H36O2	307.26	307.26	308.272	[M-H]-	1	5598-38-9	C16525	220060	129862	122529	60298	49347.8	46860.5	54605	40608.5	38671.7	43980.3	55808.3	41371.8	66349.7	62738.2	53694.2	171778	90189.4	123581	ko01040	C16525	-
pmn001672	0.914446	1.83e-06	-0.786056	0.000511584	Furanofructosyl-α-D-(3-mustard acyl)glucoside*	Phenolic acids	Phenolic acids	C23H32O15	547.17	223.1	548.174	[M-H]-	1	-	-	36256.6	39253.3	35309.2	20129.5	22964.6	21671.4	15651.2	13729	15744.6	15738.9	23318.9	17137.2	7536.61	6047.72	3223.27	15969.2	16082.5	17012.2	-	CM02709	MetMap153
pmp000344	0.894049	6.99e-06	-0.73673	0.00173079	3',4',7-Trihydroxyflavone	Flavonoids	Flavones	C15H10O5	271.06	243.06	270.053	[M+H]+	3	2150-11-0	-	280307	280939	359354	149040	122095	168771	109630	126913	108566	153522	145984	159242	20277.9	28525.4	18046	144729	145901	106136	-	-	-
pmp001251	0.85685	4.5e-05	-0.853562	5.18e-05	LysoPC 18:2(2n isomer)*	Lipids	LPC	C26H50NO7P	520.34	184.07	519.332	[M+H]+	1	-	-	544855	543100	426264	267591	298342	293823	164718	178148	170513	120536	139687	124953	266253	271404	258816	306453	380816	295705	-	-	-
pmp001273	0.840626	8.68e-05	-0.632138	0.0114583	LysoPC 18:2*	Lipids	LPC	C26H50NO7P	520.34	184.07	519.332	[M+H]+	1	-	-	121791	136808	82244.9	60483.8	72220.5	51975.1	42771.4	75438.9	62191.4	61483.3	55730.6	72529.1	78324.5	64819.1	45217.9	81601.2	84835.2	57727.4	-	-	-
Qahn004089	0.941447	1.66e-07	-0.785176	0.000524209	Magnoloside D	Phenolic acids	Phenolic acids	C29H36O15	623.19	461.17	624.205	[M-H]-	2	1418309-03-1	-	163545	217793	201219	68849.5	46792.1	60082.7	83185.1	76091.3	48819	53288.2	64325.3	72499.9	30502.2	34612.6	31010.7	102157	110351	104410	-	-	-
Qmdp112312	0.934619	3.35e-07	-0.861852	3.62e-05	Vitetrifolin A	Terpenoids	Ditepenoids	C20H32O3	321.24	111.04	320.235	[M+H]+	3	-	-	764576	646260	653141	376989	388614	404339	107342	113644	96740.3	150921	213290	194804	140932	148305	141777	481242	498064	501494	-	-	-
Qmdp112404	0.91104	2.34e-06	-0.80505	0.000293661	Viteagnusin B*	Terpenoids	Ditepenoids	C22H36O3	349.27	179.14	348.266	[M+H]+	2	-	-	651374	646776	590613	279004	264954	232347	133028	126628	137469	132629	134743	146277	274504	287336	267503	477435	480080	454156	-	-	-
Qmdp112405	0.887097	1.04e-05	-0.79282	0.000422532	Viteagnusin A	Terpenoids	Ditepenoids	C22H36O3	349.27	293.21	348.266	[M+H]+	2	-	-	235164	253412	198826	102665	113317	84784.8	51954.5	40790.3	37198.4	34923.3	52497.4	54813	93632.5	124809	88560.6	154099	149030	146386	-	-	-
Qmjp080503	-0.803311	0.000309714	0.745828	0.00141073	7α-Hydroxyeudesm-4-en-6-one	Terpenoids	Sesquiterpenoids	C15H24O2	237.15	159.12	236.178	[M+H]+	2	-	-	3976.79	3976.79	3976.79	27657.2	30637.5	27580.3	19884	43097.3	30781.8	30728	28306	45605.1	28355.1	52354.5	24700.5	30301.2	31361.6	23465.9	-	-	-
Qmxp101615	0.90216	4.25e-06	-0.801069	0.000331467	Ent-3β-Acetoxyisopimar-15-8β-ol*	Terpenoids	Ditepenoids	C22H36O3	349.27	179.14	348.266	[M+H]+	2	-	-	661651	662987	602216	273255	260895	247311	139172	131799	117918	114606	133587	145675	274228	291773	295050	425835	463300	496364	-	-	-
Qmzp101823	0.886183	1.09e-05	-0.872359	2.22e-05	Hinokinin	Lignans and Coumarins	Lignans	C20H18O6	355.12	135.04	354.11	[M+H]+	3	26543-89-5	C10627	1.02358e+06	995962	917237	624203	777878	676596	266574	311581	235214	290637	415717	342406	334691	297346	312768	837428	845449	716071	-	C10627	-
Rdp04362	0.957246	2.24e-08	-0.72498	0.00222796	4,2',3'-Trihydroxychalcone 4-O-glucoside*	Flavonoids	Chalcones	C21H22O9	419.13	257.08	418.126	[M+H]+	3	-	-	405450	391134	495370	113793	137058	82073.3	16414.7	16414.7	16414.7	166347	87871.7	138751	16414.7	16414.7	16414.7	175318	202005	178661	-	-	-
Rfn010265	0.863422	3.37e-05	-0.875797	1.88e-05	Phosphatidylethanolamine lyso 18:2*	Lipids	Free fatty acids	C23H44NO7P	478.29	337.28	477.286	[M+H]+	1	-	-	1.6312e+07	1.43325e+07	1.28289e+07	1.17257e+07	1.27549e+07	9.71329e+06	6.56345e+06	6.9747e+06	7.83184e+06	6.59136e+06	7.60979e+06	7.73317e+06	5.7904e+06	6.65228e+06	6.95218e+06	1.12801e+07	1.1825e+07	1.05571e+07	-	-	-
Rfn0110118	-0.890583	8.54e-06	0.612479	0.0152142	Phomolide G	Others	Others	C12H20O5	243.12	181.12	244.131	[M-H]-	2	-	-	10951.1	7602.86	14391.2	26407.3	18480.4	19029.8	23883.1	26691.3	24662.3	20817.6	19244.3	19649.8	24324.7	21296.9	25316.4	19210.8	15017	12478.4	-	-	-
Rfn0518	0.904944	3.55e-06	-0.79789	0.000364439	2-Methylpyrrolidine-2-carboxylic acid*	Alkaloids	Alkaloids	C6H11NO2	130.09	84.09	129.079	[M+H]+	2	16277-06-8	-	2.1173e+07	2.21183e+07	2.06278e+07	1.07267e+07	9.95713e+06	9.5827e+06	7.60308e+06	7.28343e+06	7.16149e+06	6.89634e+06	7.11955e+06	7.09195e+06	1.10204e+07	1.14413e+07	1.14478e+07	1.18325e+07	1.28001e+07	1.1772e+07	-	-	-
Rfn07523	0.9364	2.81e-07	-0.636622	0.0107131	5-methoxy-2-(3-methylbut-2-enyl)benzene-1,3-diol	Others	Others	C12H16O3	209.12	153.06	208.11	[M+H]+	3	-	-	995184	1.21203e+06	1.20964e+06	254261	351353	515326	191006	248431	169481	436273	704620	455010	330106	210689	214413	493854	597892	461683	-	-	-
Rfp109585	0.977903	3.22e-10	-0.859382	4.03e-05	cis-N-p-coumaroyltyramine	Alkaloids	Phenolamine	C17H17N1O3	284.13	147.05	283.121	[M+H]+	1	-	-	2.52666e+06	2.66744e+06	2.64822e+06	864510	970556	897171	620015	756245	749869	678316	660336	678549	225013	311149	216946	1.077e+06	1.29531e+06	1.20071e+06	-	-	-
Rln0018	0.831525	0.000121711	-0.696842	0.00389094	3-Methoxybenzaldehyde*	Others	Aldehyde compounds	C8H8O2	135.04	92.03	136.052	[M-H]-	3	591-31-1	-	311063	346316	345679	116305	85992.5	128118	119503	144218	102904	99698.4	73758.8	113147	223787	151500	177601	183788	179045	196738	-	-	-
Rlp00117	0.863123	3.42e-05	-0.821677	0.000171695	12,13-Dehydrogeranylgeraniol	Terpenoids	Monoterpenoids	C18H30O	263.24	67.05	262.23	[M+H]+	1	352274-18-1	-	691970	704252	598769	428144	480058	478309	227671	322108	299349	311135	320104	282601	327720	458448	379809	550390	523271	517421	-	-	-
Rlp02935	-0.93824	2.33e-07	0.820671	0.000177631	(3Z,9Z)-7-{[3,4,5-trihydroxy-6-(hydroxymethyl)oxan-2-yl]oxy}-1-oxacyclododeca-3,9-dien-2-one	Others	Lactones	C17H26O8	359.17	197.12	358.163	[M+H]+	1	-	-	370167	371553	340435	807022	1.13952e+06	950472	954602	1.10211e+06	962231	1.10666e+06	940427	1.07389e+06	1.02993e+06	1.27331e+06	1.13166e+06	913090	797800	939193	-	-	-
Rlp07143	0.984618	3.11e-11	-0.859533	4.01e-05	4,2'-Dihydroxychalcone 4-glucoside	Flavonoids	Chalcones	C21H22O8	403.14	241.09	402.132	[M+H]+	3	-	-	1.93718e+06	1.77941e+06	1.6825e+06	606209	648565	632601	216613	220453	218099	328142	320268	379241	38340.7	27391.7	40142.9	573108	655978	577382	-	-	-
Rp0029156	0.920331	1.17e-06	-0.630885	0.0116737	2,3-dihydroxycinnamic acid	Phenolic acids	Phenolic acids	C9H8O4	181.05	135.04	180.042	[M+H]+	1	31082-90-3	C12623	511563	414082	379792	218427	104369	8574.27	147089	105039	129084	153438	169866	246348	123295	71819.1	42871.4	277025	258101	109367	ko00360,ko01100	C12623	-
Rp003307	0.947245	8.57e-08	-0.834632	0.000108701	Isoglutamine*	Amino acids and derivatives	Amino acids and derivatives	C5H10N2O3	147.08	84.05	146.069	[M+H]+	3	636-65-7	C16673	2.14652e+07	1.9373e+07	2.36838e+07	6.33357e+06	6.88486e+06	6.3383e+06	8.56758e+06	7.63877e+06	7.40736e+06	5.31841e+06	6.0703e+06	6.14173e+06	2.00952e+06	1.58832e+06	1.92271e+06	8.53426e+06	9.04838e+06	7.7689e+06	ko00340	C16673	-
Rsn000556	0.905183	3.49e-06	-0.814127	0.000220497	glucose 3-phosphate*	Others	Saccharides	C6H13O9P	259.02	96.97	260.03	[M-H]-	1	-	-	1.98403e+06	2.1092e+06	1.84616e+06	1.36055e+06	1.36979e+06	1.47261e+06	1.49918e+06	1.44212e+06	1.48602e+06	1.1898e+06	1.4476e+06	1.33616e+06	1.39474e+06	1.38308e+06	1.43479e+06	1.65656e+06	1.63782e+06	1.65849e+06	-	-	-
Sadp000763	0.968603	3.09e-09	-0.822393	0.000167572	2-amino-5-[(C-hydroxycarbonimidoyl)amino]pentanimidic acid	Alkaloids	Alkaloids	C6H14N4O2	175.12	70.07	174.112	[M+H]+	1	-	-	823913	739526	658919	183385	232848	215514	236446	197989	247627	186550	218216	180974	17458.9	16956.1	13493.3	332526	321503	332047	-	-	-
Sadp005873	-0.856489	4.57e-05	0.800979	0.000332364	Prosopidione	Terpenoids	Monoterpenoids	C13H20O2	209.15	95.05	208.146	[M+H]+	3	-	-	13394.2	13394.2	13394.2	91050.5	94147.8	150245	104950	160942	151036	124086	175751	131906	202746	133274	114428	66970.8	140058	92461.4	-	-	-
Safn002774	0.94972	6.31e-08	-0.64187	0.00988924	Chaenorrhinoside	Others	Others	C15H18O9	341.09	179.04	342.095	[M-H]-	3	-	-	6.30186e+06	6.33469e+06	6.4687e+06	2.48097e+06	2.35485e+06	2.48624e+06	2.60614e+06	2.85629e+06	2.702e+06	3.28212e+06	3.50895e+06	3.32532e+06	2.93268e+06	3.2071e+06	2.80831e+06	3.97429e+06	4.08383e+06	3.77388e+06	-	-	-
Safp000959	0.953257	3.96e-08	-0.706589	0.00323017	N-[(4-methoxyphenyl)methyl]-2-(7H-purin-6-ylsulfanyl)acetamide	Alkaloids	Alkaloids	C15H15N5O2S	330.09	121.06	329.095	[M+H]+	3	-	-	68591.6	68827.1	62805.2	20875.4	14872.7	24921	10884.6	12512.9	16313	20967.4	23525.9	23389	21266.7	20723.9	29253.4	41159	47858.6	23335.3	-	-	-
Salp000527	0.953068	4.06e-08	-0.842358	8.12e-05	(2R,5S)-2,5-Diaminohexanoate	Amino acids and derivatives	Amino acids and derivatives	C6H14N2O2	147.11	84.04	146.106	[M+H]+	3	-	C05161	2.24511e+07	1.92013e+07	2.34511e+07	7.24762e+06	7.00735e+06	6.47489e+06	8.33676e+06	7.31726e+06	7.54059e+06	4.98776e+06	6.40476e+06	6.15972e+06	2.04078e+06	1.73357e+06	1.71784e+06	8.40345e+06	9.31353e+06	7.76214e+06	ko00310,ko00470,ko01100	C05161	-
Sasn000277	0.925955	7.37e-07	-0.855423	4.78e-05	myo-Inositol 4-phosphate	Others	Saccharides	C6H13O9P	259.02	78.96	260.03	[M-H]-	1	142760-33-6	C03546	659163	663477	633407	514197	459597	490268	436392	503098	509910	435614	475390	436776	425660	469963	473991	522899	552167	492089	ko00562,ko01100,ko04070	C03546	-
Sayp012405	0.928332	5.99e-07	-0.792482	0.00042665	Tomocinol A*	Terpenoids	Ditepenoids	C22H36O3	349.27	179.14	348.266	[M+H]+	2	-	-	614287	669675	554835	246687	262385	220627	153151	134081	118353	143581	170870	152712	226773	291054	246451	478492	455613	423464	-	-	-
Smln008909	0.89503	6.6e-06	-0.752635	0.00120399	Aloebarbendol	Phenolic acids	Phenolic acids	C15H14O4	257.08	239.07	258.089	[M-H]-	2	194145-93-2	-	22790.3	26346.9	32897.7	11001.1	15209	15956.7	6341.4	11520.8	8389.83	7539.68	13588.4	14676.8	10914.7	7955.08	10217.3	15872.9	12771.7	18190.3	-	-	-
Wacyp09666	0.865914	3.01e-05	-0.738346	0.00167002	6-Hydroxy-3,9-Undecadienoic acid Methyl Ester	Lipids	Free fatty acids	C12H20O3	213.15	111.04	212.141	[M+H]+	1	-	-	1.24878e+07	1.06249e+07	7.76066e+06	7.82032e+06	7.19205e+06	6.94099e+06	5.87108e+06	6.37173e+06	5.46814e+06	6.62957e+06	6.60782e+06	6.41057e+06	3.37697e+06	4.20548e+06	3.35726e+06	6.76561e+06	8.59437e+06	7.26876e+06	-	-	-
Wadp007964	0.948297	7.54e-08	-0.609486	0.0158606	7-Oxo-pimara-8,11,15-trien-2-ol	Terpenoids	Ditepenoids	C20H28O2	301.22	147.08	300.209	[M+H]+	3	-	-	69154.7	60743.8	75662.8	3332.96	3332.96	3332.96	3332.96	3332.96	3332.96	23482.5	21132.3	26243.4	3332.96	3332.96	3332.96	18957	16664.8	31713.3	-	-	-
Wafn003070	0.969712	2.45e-09	-0.713511	0.00281776	Hydroxyferulic acid glucoside	Phenolic acids	Phenolic acids	C16H20O10	371.1	209.05	372.106	[M-H]-	2	-	-	1.966e+06	1.4934e+06	1.44408e+06	526459	574673	622640	85659.2	67260.4	69951.8	568256	630667	527208	268875	169616	193130	630576	689355	700317	-	CM02676	MetMap165,MetMap166,MetMap168
Wafp004641	0.836084	0.000103026	-0.795698	0.000388697	N-Feruloyltyramine 4-glucoside	Alkaloids	Phenolamine	C24H29NO9	476.19	314.14	475.184	[M+H]+	3	-	-	684060	632678	930464	304582	665411	386197	323792	369491	253763	288940	336364	348371	243090	172587	218381	384408	435592	695931	-	-	-
Wahlp08069	0.90273	4.1e-06	-0.858102	4.27e-05	LysoPC 17:2(2n isomer)*	Lipids	LPC	C25H48NO7P	506.32	184.07	505.317	[M+H]+	3	-	-	116259	96485.2	88129.1	50205.3	43848.3	70019.9	32926.6	29782	20515.6	21461.6	31967.6	23808.6	44734.9	39889.7	30885.5	56482.6	69643.9	53092.6	-	-	-
Walbn00444	0.941125	1.72e-07	-0.768835	0.000808956	6''-Carboxyraffinose	Others	Saccharides	C18H30O17	517.14	175.02	518.148	[M-H]-	2	104880-42-4	-	508145	430714	432424	162716	161887	157506	209883	217143	235828	160260	210879	198539	100011	81665.1	74841.5	246377	278796	214031	-	-	-
Walbn08060	0.830112	0.000128042	-0.894427	6.84e-06	1-(((2-(dimethylamino)ethoxy)(hydroxy)phosphoryl)oxy)-3-hydroxypropan-2-yl (9Z,12Z)-octadeca-9,12-dienoate*	Lipids	LPE	C25H48NO7P	504.31	279.24	505.317	[M-H]-	1	-	-	1.36695e+06	1.21555e+06	1.07857e+06	765974	742547	830112	452956	407082	532202	311668	324141	267709	722795	596521	562148	848138	752858	849712	-	-	-
Walbn08189	0.863782	3.32e-05	-0.935618	3.04e-07	3-(((2-(dimethylamino)ethoxy)(hydroxy)phosphoryl)oxy)-2-hydroxypropyl (9Z,12Z)-octadeca-9,12-dienoate*	Lipids	LPE	C25H48NO7P	504.31	279.23	505.317	[M-H]-	1	-	-	1.34609e+06	1.17144e+06	1.04658e+06	687547	805265	742318	436312	399130	494153	255449	265359	267755	516797	476359	480522	721141	742818	838367	-	-	-
Waln010743	0.819783	0.000183012	-0.931777	4.39e-07	1-(2,3-dihydroxypropoxy)-3-(((2-(dimethylamino)ethoxy)(hydroxy)phosphoryl)oxy)propan-2-yl (11Z,14Z)-octadeca-11,14-dienoate*	Lipids	LPE	C28H54NO9P	578.35	279.23	579.354	[M-H]-	1	-	-	2.8861e+06	2.82278e+06	2.44738e+06	1.93886e+06	1.95952e+06	1.90935e+06	1.12257e+06	1.09323e+06	1.01932e+06	660417	713584	732968	1.31281e+06	1.35683e+06	1.31004e+06	1.8332e+06	1.78848e+06	1.76428e+06	-	-	-
Waln011009	0.822758	0.0001655	-0.928574	5.87e-07	2-(2,3-dihydroxypropoxy)-3-(((2-(dimethylamino)ethoxy)(hydroxy)phosphoryl)oxy)propyl (11Z,14Z)-octadeca-11,14-dienoate*	Lipids	LPE	C28H54NO9P	578.34	279.23	579.354	[M-H]-	1	-	-	2.81327e+06	2.9012e+06	2.42952e+06	1.95584e+06	1.82902e+06	1.88312e+06	1.08839e+06	1.09093e+06	1.08594e+06	682509	692990	740463	1.3215e+06	1.40716e+06	1.31046e+06	1.8939e+06	1.80844e+06	1.80753e+06	-	-	-
Waln011222	0.871274	2.34e-05	-0.884425	1.2e-05	2-(2,3-dihydroxypropoxy)-3-(((2-(dimethylamino)ethoxy)(hydroxy)phosphoryl)oxy)propyl palmitate*	Lipids	LPE	C26H54NO9P	554.34	255.23	555.354	[M-H]-	1	-	-	194744	185822	140756	102791	106245	97378	96875.5	102721	95555.1	64191.6	61909.7	71948.4	88572.5	100321	92033.5	134532	139844	130519	-	-	-
Wamxn04683	-0.856643	4.54e-05	0.94784	7.97e-08	4,10-dioxo-10-(sulfooxy)decanoic acid	Others	Others	C10H16O8S	295.05	96.96	296.057	[M-H]-	1	-	-	407826	412089	361159	863255	790135	865936	865676	851927	835809	1.07047e+06	1.09818e+06	1.2003e+06	926859	1.04737e+06	951228	864164	792631	900767	-	-	-
WapTKC002297	0.936266	2.85e-07	-0.865784	3.03e-05	1,6-Dihydroxy-2,7(19),10,14-Phytatetraen-13-one*	Terpenoids	Ditepenoids	C20H32O3	321.24	179.14	320.235	[M+H]+	1	79404-59-4	-	2.51138e+07	2.52808e+07	2.19202e+07	1.3145e+07	1.42874e+07	1.31625e+07	3.62286e+06	3.44006e+06	3.40751e+06	5.45686e+06	6.84973e+06	6.63718e+06	4.38139e+06	5.04343e+06	4.01366e+06	1.90195e+07	1.72897e+07	1.73436e+07	-	-	-
WapTKC002543	0.91899	1.3e-06	-0.687235	0.00464324	Ent-14,15-Dinor-3-Cleroden-3-one*	Terpenoids	Ditepenoids	C18H30O	263.24	81.07	262.23	[M+H]+	1	130466-21-6	-	879738	762282	638071	444192	349678	536083	334173	413585	391311	445374	573867	385334	265236	305172	337487	594096	693832	696631	-	-	-
WapTKC008879	0.962574	9.55e-09	-0.611159	0.0154968	19-Norandrographolide C	Terpenoids	Ditepenoids	C19H24O3	301.18	255.21	300.173	[M+H]+	2	932014-90-9	-	336691	333484	318361	15024.5	32526.1	19660.5	3004.89	3004.89	3004.89	121661	124787	108672	3004.89	3004.89	3004.89	119527	125722	128124	-	-	-
WapTKC009193	0.95133	5.12e-08	-0.608594	0.0160574	13-Oxo-8(14)-Podocarpen-18-Oic Acid	Terpenoids	Ditepenoids	C17H24O3	277.18	123.08	276.173	[M+H]+	3	63976-69-2	-	60985.4	56008.8	65553.3	4005.52	4005.52	4005.52	4005.52	4005.52	4005.52	24002.9	21701.7	20027.6	4005.52	4005.52	4005.52	32239.8	23466.5	45366.4	-	-	-
WapTKC015266	0.96089	1.27e-08	-0.616663	0.0143449	Yucalexin B7	Terpenoids	Ditepenoids	C20H28O2	301.22	131.09	300.209	[M+H]+	2	64657-12-1	-	651236	554971	616767	40018.9	39152.1	57298.3	42662.6	28310.6	25850.2	215722	239192	196889	17656.9	23729	37097	184889	216630	192078	-	-	-
WapTKC021287	-0.897184	5.8e-06	0.91883	1.32e-06	P-Menth-1-En-8-ol O-β-D-Glucopyranoside	Terpenoids	Monoterpenoids	C16H28O6	317.2	137.13	316.189	[M+H]+	3	114673-99-3	-	348625	411866	404972	657596	1.08265e+06	1.12262e+06	1.2264e+06	1.1335e+06	1.15773e+06	1.31988e+06	1.29237e+06	1.40283e+06	1.26669e+06	1.329e+06	1.25296e+06	1.02091e+06	770842	1.12388e+06	-	-	-
WapTKC034280	-0.822299	0.000168109	0.721389	0.00240083	6-Eudesmene-1,4-diol 1-O-β-D-Glucopyranoside*	Terpenoids	Sesquiterpenoids	C21H36O7	401.25	135.12	400.246	[M+H]+	1	1204210-53-6	-	2185.93	2185.93	2185.93	16895	22597.3	16348.8	21046.6	23621.4	12906.5	21157.3	19350.3	22752.3	16728.6	18689.9	10929.6	24060.1	19835.2	27934.5	-	-	-
WapTKC038188	0.937888	2.42e-07	-0.683239	0.00498823	8-Hydroxy-2-Oxo-1(10),3,11(13)-Guaiatrien-12,6-olide 8-O-β-D-Glucopyranoside*	Terpenoids	Sesquiterpenoids	C21H26O9	423.16	261.11	422.158	[M+H]+	1	152243-06-6	-	254632	244471	197635	117757	57503.1	41701.1	74677.8	100050	60228.8	59820.2	141382	91629.4	38017.5	69194.2	47248.9	101211	151327	88558.7	-	-	-
WapTKC089529	-0.848302	6.42e-05	0.694707	0.0040491	1-[4-[(2S,3R,4S,5S,6R)-3,4,5-Trihydroxy-6-[[(2S,3R,4S,5R)-3,4,5-Trihydroxyoxan-2-Yl]Oxymethyl]Oxan-2-Yl]Oxyphenyl]Ethanone	Terpenoids	Sesquiterpenoids	C19H26O11	431.15	137.06	430.147	[M+H]+	2	-	-	107100	85668.2	61225.7	222659	374031	414784	302746	290533	362703	320729	290612	319519	399878	569820	516074	260140	299977	410208	-	-	-
WapTKC167236	0.925122	7.91e-07	-0.868521	2.67e-05	4-[3-(4,8-Dimethyl-3,7-Nonadienyl)-3-Methyloxiranyl]-2-Butanone	Terpenoids	Ditepenoids	C18H30O2	279.23	81.07	278.225	[M+H]+	1	115028-53-0	-	2.16462e+06	2.08546e+06	1.97514e+06	866678	742602	818291	805548	806101	766179	430944	452794	523778	787051	845800	825689	1.53403e+06	1.47463e+06	1.35719e+06	-	-	-
WapTKC172691	0.929822	5.25e-07	-0.847665	6.59e-05	3-Hydroxylabda-8(20),13-Dien-15-Oic Acid	Terpenoids	Ditepenoids	C20H32O3	321.24	135.08	320.235	[M+H]+	2	-	-	1.10559e+06	1.11724e+06	1.0198e+06	669384	617770	590798	155210	149687	147977	288878	333903	341644	166298	247286	201455	757346	737078	824284	-	-	-
WapTKC207821	0.829513	0.000130804	-0.641124	0.0100032	2-isopropyl-3,4,8,9-tetramethyl-5-methylenecyclodeca-3,8-dien-1-ol*	Terpenoids	Sesquiterpenoids	C18H30O	263.24	81.07	262.23	[M+H]+	1	-	-	678501	680361	494459	433746	526869	464987	206154	326645	223059	373561	481463	381117	239149	285469	366345	526516	758780	605038	-	-	-
WapTKC214327	-0.815743	0.000209199	0.772168	0.000742528	atramacronoid M	Terpenoids	Sesquiterpenoids	C15H24O2	237.18	201.16	236.178	[M+H]+	1	-	-	1986.23	1986.23	9931.16	15741.7	25410.9	27923.9	24839.1	43688.4	15451.8	34864.1	24567.6	32207.3	31437.5	30905.9	29558.1	15790	21902	11860	-	-	-
Wasdp03092	-0.821098	0.000175091	0.625271	0.0126774	Isoscoparin 2''-O-glucoside*	Flavonoids	Flavones	C28H32O16	625.17	463.13	624.169	[M+H]+	2	97605-25-9	-	2265.39	2265.39	2265.39	20880.7	36897.1	23263	36334.2	41185.3	29464.5	30899.1	12681.6	27696.1	46148.8	44775.8	67484	24278.7	11327	33218.6	-	-	-
Wasdp05671	-0.882836	1.31e-05	0.777435	0.000646647	Santalol A	Terpenoids	Sesquiterpenoids	C15H24O	221.19	81.07	220.183	[M+H]+	2	-	-	324913	370363	337415	560634	649651	634627	523860	562291	572850	616968	545096	667566	745513	746687	719747	460714	560957	594075	-	-	-
WaYn011606	0.925154	7.88e-07	-0.666121	0.00670235	1-(2,3-dihydroxypropoxy)-3-(((2-(dimethylamino)ethoxy)(hydroxy)phosphoryl)oxy)propan-2-yl heptadecanoate	Lipids	LPE	C27H56NO9P	568.36	269.25	569.369	[M-H]-	1	-	-	55529.5	51267	41865	31814.2	31002.2	29001.1	29253.3	34465.8	23303.1	33118.5	37139.1	31591.8	24334.8	21865.1	20525	35400.3	38960	40983.7	-	-	-
Wbmp008021	0.918701	1.33e-06	-0.926349	7.12e-07	(14-Ethyl-4,6,19-trimethoxy-9,11-dioxa-14-azaheptacyclo[10.7.2.12,5.01,13.03,8.08,12.016,20]docosan-21-yl)acetate	Alkaloids	Alkaloids	C26H39NO7	478.28	337.27	477.273	[M+H]+	2	-	-	1.81237e+07	1.75781e+07	1.49071e+07	1.09543e+07	1.20857e+07	1.17634e+07	7.47652e+06	8.40754e+06	8.36688e+06	7.25557e+06	7.04659e+06	7.43004e+06	6.71263e+06	8.0398e+06	7.32384e+06	1.10327e+07	1.12416e+07	1.09083e+07	-	-	-
Wcdp010162	0.859392	4.03e-05	-0.656852	0.0078069	1-Monolinolenoyl-Rac-Glycerol*	Lipids	Glycerol ester	C21H36O4	353.27	261.22	352.261	[M+H]+	1	18465-99-1	-	1.29549e+06	1.37928e+06	986402	495338	523837	434864	448058	405394	364967	480845	442126	438476	706609	701698	742942	944249	959787	842053	-	-	-
Wcdp010708	0.902253	4.22e-06	-0.848341	6.41e-05	Octadeca-2,9,12,15-tetraen-1-ol	Others	Others	C18H30O	263.24	81.07	262.23	[M+H]+	1	-	-	964301	1.07561e+06	801195	609014	677658	666899	344350	446252	502293	458048	489318	413332	498524	507113	465077	722833	813103	953658	-	-	-
Wcfn008410	0.956394	2.54e-08	-0.622085	0.0132759	1,3-Dihydroxyanthraquinone (Xanthopurpurin)	Quinones	Anthraquinone	C14H8O4	239.03	211.04	240.042	[M-H]-	3	518-83-2	-	206948	204635	203387	62072.6	72157.6	82380.1	31900.9	46818	57137.1	109702	116859	92830.3	55715.4	64841.3	42596	164996	143828	146742	-	-	-
Wcsn010375	0.920824	1.12e-06	-0.790123	0.000456382	Methyl (4E,8E,11E)-5,9,13-trimethyltetradeca-4,8,11-trienoate	Others	Others	C18H30O2	277.22	59.01	278.225	[M-H]-	1	-	-	84599.3	84648.7	69323.4	25536.9	27778.2	24730.3	39675.3	32361.5	25356.6	12668.6	25503.7	28198.8	34617.3	29047.4	28474.6	65918.4	48642.5	43866	-	-	-
Wcsn010524	0.976818	4.39e-10	-0.833646	0.000112699	8,11-Heptadecadienoic acid	Lipids	Free fatty acids	C17H30O2	265.22	265.22	266.225	[M-H]-	1	-	-	94001.7	96563.8	81495.4	38088.3	46996.1	37658.6	19376.1	23025.8	19765.7	28254.3	29307.9	27888.2	21747.9	27571	26336.5	66956.5	62159.4	61281.1	-	-	-
Wcsn011332	0.946186	9.72e-08	-0.923381	9.14e-07	Ethyl (10Z,13Z)-hexadeca-10,13-dienoate	Others	Others	C18H32O2	279.23	261.23	280.24	[M-H]-	1	-	-	115240	109913	101956	74000	69703.6	70635.9	64804.1	62878.8	66587	54163.4	58663.6	51152.4	61145.2	55855.2	57694.6	84494.4	99232	93813.9	-	-	-
Wcsp008252	0.933756	3.64e-07	-0.885869	1.11e-05	8α,11-dihydroxypachydictyol A	Others	Others	C20H32O3	321.24	151.11	320.235	[M+H]+	2	-	-	376488	365425	353780	203689	228475	185835	62922.2	57673.7	72859.8	82075.7	90480.9	106312	52561.8	62693.6	57741.6	239230	229381	259056	-	-	-
Wdhp006324	0.987082	1.01e-11	-0.863004	3.44e-05	3-(4-hydroxyphenyl)-n-[2-(4-hydroxyphenyl)ethyl]prop-2-enimidic acid	Alkaloids	Isoquinoline alkaloids	C17H17NO3	284.13	121.07	283.121	[M+H]+	1	-	-	1.43102e+06	1.36606e+06	1.25246e+06	479099	523402	450690	302411	309516	361512	326760	332231	324848	138801	185005	109942	676992	532966	552843	-	-	-
Wdjp008771	0.861822	3.62e-05	-0.662645	0.00710115	1-[(7-Hydroxy-4-methoxy-9,10-dihydrophenanthren-2-yl)oxy]-4-methoxyphenanthrene-2,7-diol	Others	Others	C30H24O6	481.17	241.09	480.157	[M+H]+	1	-	-	195690	196514	171653	38014.6	77375.1	137806	54378.3	57391.9	125132	109907	96298.2	86822.9	55123.5	37498.5	49382.1	91204.5	95783.6	163084	-	-	-
Wmzn000227	0.932502	4.1e-07	-0.860011	3.93e-05	2,2-Dimethylsuccinic acid	Organic acids	Organic acids	C6H10O4	145.06	109.04	146.058	[M-H]-	3	597-43-3	-	28724.2	21173.1	25408.9	14098.9	8053.65	9534.84	9552.48	4011.84	6009	5515.67	9099.5	2009.67	3023	5035.31	4523	10578	9045	12573.6	-	-	-
Yajn003916	-0.838993	9.24e-05	0.887119	1.04e-05	(1S,4aS,7aR)-7-(3-hydroxybutyl)-4-((((2R,3R,4S,5S,6R)-3,4,5-trihydroxy-6-(hydroxymethyl)tetrahydro-2H-pyran-2-yl)oxy)methyl)-1,4a,5,6,7,7a-hexahydrocyclopenta[c]pyran-1-yl acetate	Terpenoids	Monoterpenoids	C21H34O10	445.21	59.01	446.215	[M-H]-	2	-	-	1.1556e+06	1.15558e+06	1.07865e+06	1.45083e+06	1.24475e+06	1.33706e+06	1.45657e+06	1.41169e+06	1.60329e+06	1.5188e+06	1.54258e+06	1.56347e+06	1.5451e+06	1.46065e+06	1.47826e+06	1.25785e+06	1.48296e+06	1.27413e+06	-	-	-
Yalp000545	0.948165	7.66e-08	-0.802458	0.00031785	N-Methyl-L-proline*	Amino acids and derivatives	Amino acids and derivatives	C6H11NO2	130.09	84.08	129.079	[M+H]+	2	475-11-6	C22223	2.71486e+07	2.29028e+07	2.62249e+07	1.00282e+07	8.49129e+06	9.59845e+06	8.85462e+06	1.0036e+07	8.25342e+06	8.69321e+06	7.62806e+06	7.61756e+06	1.09829e+07	9.46736e+06	9.91443e+06	1.22262e+07	1.45457e+07	1.29149e+07	-	C22223	-
Ymjm000067	0.94413	1.23e-07	-0.869207	2.58e-05	14-Hydroxyvibsanin F*	Terpenoids	Ditepenoids	C20H32O3	321.24	179.14	320.235	[M+H]+	1	-	-	2.54611e+07	2.507e+07	2.32228e+07	1.33353e+07	1.34661e+07	1.31097e+07	3.69964e+06	3.36107e+06	3.7726e+06	5.68851e+06	6.76477e+06	6.57725e+06	4.40093e+06	4.93505e+06	4.34157e+06	1.80612e+07	1.70293e+07	1.93013e+07	-	-	-
Zasn010433	0.917503	1.46e-06	-0.776317	0.000666117	Linolelaidic acid ethyl ester*	Lipids	Free fatty acids	C20H36O2	307.26	307.26	308.272	[M-H]-	1	544-35-4	-	56253.1	33084.3	38304.5	15158.4	16452	12449.4	15368.2	9508.21	14087.7	9272.22	13701.5	10118	11405.7	14728.4	15218.8	46497.2	29818.6	35119.5	-	-	-
Zazn006864	0.94211	1.55e-07	-0.727996	0.00209062	Nor-toralactone	Others	Others	C14H10O5	257.04	213.06	258.053	[M-H]-	3	-	-	70418.6	78853.7	82959	19439.1	30465	42344.6	16211.1	15322.5	23646.7	26337.3	37627.7	28478.7	29705.6	25177.5	17331.6	42387.8	43484.9	38533	-	-	-
Zbjn003642	0.868504	2.67e-05	-0.800699	0.000335174	1-O-rhamnose-3-O-Caffeoyl Quinic Acid	Phenolic acids	Phenolic acids	C22H28O13	499.15	191.06	500.155	[M-H]-	2	-	-	112028	122127	90605.5	28135.2	27882.9	33774.9	57313.8	56475	47796.7	21604.4	23877	23908.8	37518	39900.8	35444.3	58620.8	58776.4	64844.2	-	-	-
Zbjp002681	0.826807	0.000143903	-0.754105	0.00116274	1,7-bis(4-hydroxy-3-methoxyphenyl)hept-1-ene-3-ol	Others	Ketone compounds	C21H26O5	359.18	137.06	358.178	[M+H]+	2	-	-	94938	121847	59273.2	45662.9	70949.2	30231.4	53318.3	30038.8	27935.8	30355.3	24833.8	44460.3	35583.5	22387.4	33068.7	68672.3	86441.1	89195.1	-	-	-
Zbln006394	0.907725	2.94e-06	-0.775423	0.000682021	shancigusin F	Others	Stilbene	C21H26O8	405.16	243.11	406.163	[M-H]-	1	-	-	2.03666e+06	1.85187e+06	1.83537e+06	1.21135e+06	1.25512e+06	1.18655e+06	353371	384787	367842	838861	865678	901060	253851	270229	283023	907088	924043	885811	-	CM02310	MetMap150,MetMap152
Zbln007359	0.979053	2.28e-10	-0.8546	4.95e-05	2,7-dihydroxy-4-methoxyphenanthrene	Quinones	PhenAnthraquinones	C15H12O3	239.07	196.05	240.079	[M-H]-	1	130827-45-1	-	5.43635e+06	5.53428e+06	5.02253e+06	2.15549e+06	2.07033e+06	1.99405e+06	879101	857561	939008	1.29234e+06	1.26196e+06	1.36586e+06	160279	170525	168147	2.24084e+06	2.24817e+06	2.20856e+06	-	-	-
Zbln007777	0.983004	5.93e-11	-0.85655	4.56e-05	Flavidin	Quinones	PhenAnthraquinones	C15H12O3	239.07	196.06	240.079	[M-H]-	3	83924-98-5	C10258	5.68359e+06	5.221e+06	4.79275e+06	1.90895e+06	1.99876e+06	2.02066e+06	818909	879248	853638	1.16522e+06	1.26256e+06	1.17832e+06	156380	180843	159199	2.2257e+06	2.24109e+06	2.20937e+06	-	C10258	-
Zblp006164	-0.848105	6.47e-05	0.936765	2.71e-07	7,3',4'-trimethoxyquercetin-3-O-α-L-rhamnosyl(1→2)-β-D-glucopyranoside*	Flavonoids	Flavonols	C30H36O16	653.21	345.1	652.2	[M+H]+	1	-	-	4.29972e+06	4.55814e+06	3.92948e+06	7.97884e+06	7.63746e+06	8.60379e+06	9.15235e+06	9.98351e+06	9.1036e+06	1.10113e+07	1.17246e+07	1.10355e+07	9.16584e+06	1.00976e+07	8.65055e+06	8.56917e+06	7.96494e+06	8.19863e+06	-	-	-
Zbnp004589	0.869072	2.6e-05	-0.830943	0.000124287	Limocitrin 7-neohesperidoside	Flavonoids	Flavonols	C29H34O17	655.19	347.07	654.18	[M+H]+	3	-	-	288511	362132	303403	160009	114262	252064	166027	173758	160957	135252	122679	144979	149921	117846	81268.9	195904	139823	153149	-	-	-
Zbsp009837	0.923019	9.42e-07	-0.813613	0.000224194	[6]-Gingerdiol 3-acetate	Phenolic acids	Phenolic acids	C19H30O5	339.22	137.06	338.209	[M+H]+	3	143519-17-9	-	404803	470590	295220	223337	237426	206947	67540.2	79435.7	69872.1	123601	141376	125600	102257	93939.3	92149.1	285748	299662	258462	-	-	-
Zbsp010319	0.939685	2.01e-07	-0.842686	8.02e-05	[6]-Gingerdiol 5-acetate	Phenolic acids	Phenolic acids	C19H30O5	339.21	137.06	338.209	[M+H]+	3	143519-16-8	-	442455	414117	361411	233062	208055	241874	79837.1	94698.2	88647.2	88237.1	181396	116984	123874	141758	93678.3	364797	321333	336171	-	-	-
Zbsp010536	0.834418	0.000109557	-0.739017	0.00164533	Methyl-[8]-gingerol	Phenolic acids	Phenolic acids	C20H32O4	337.25	137.06	336.23	[M+H]+	3	-	-	131199	147414	156994	86631.6	86818.8	56818.1	47020.2	41117.6	50046.5	72888.5	37028.4	51478.7	90505.1	70236.1	83411.9	88039.9	90362	89070	-	-	-
Zbsp011371	0.927222	6.6e-07	-0.818885	0.000188583	Abbeokutone	Others	Others	C20H32O3	321.24	321.24	320.235	[M+H]+	3	16836-28-5	-	4.85075e+06	5.38861e+06	4.05124e+06	3.02176e+06	2.62011e+06	2.4958e+06	586636	725553	606307	1.13163e+06	1.67762e+06	1.82895e+06	628500	663874	716644	2.33751e+06	2.36088e+06	2.37504e+06	-	-	-
ZbWn003804	-0.858427	4.21e-05	0.964812	6.43e-09	8-(methoxymethoxy)decyl hydrogen sulfate	Others	Others	C12H26O6S	297.14	96.96	298.145	[M-H]-	3	-	-	569563	520222	459832	1.05449e+06	1.10615e+06	1.06404e+06	1.12538e+06	1.13261e+06	1.21602e+06	1.47001e+06	1.47373e+06	1.56651e+06	1.24726e+06	1.36054e+06	1.29292e+06	1.17698e+06	1.09058e+06	1.18373e+06	-	-	-
Zbzp008644	-0.868348	2.69e-05	0.633304	0.0112607	Eupatorium adenophora B	Terpenoids	Sesquiterpenoids	C15H24O2	237.18	121.07	236.177	[M+H]+	1	-	-	26791.8	34945.6	60779.9	118252	94969.7	94265.1	134067	110586	98273	89671.6	91817	122038	89554	103328	92932.2	102202	51361.9	60436.9	-	-	-
Zjbn102211	0.877811	1.7e-05	-0.754328	0.00115658	Gymnoside II*	Others	Others	C21H30O11	457.17	127.08	458.179	[M-H]-	2	-	-	274003	220094	243857	74383.4	53572.9	49622.7	101215	66067.8	82490.3	53601.1	40572	45187.3	108883	113166	85166.8	148921	104613	138254	-	-	-
Zjbn102533	0.937866	2.43e-07	-0.899217	5.12e-06	2,7-Dihydroxy-3,4-Dimethoxyphenanthrene	Others	Others	C16H14O4	269.08	239.04	270.089	[M-H]-	3	-	-	28394.1	29618.3	21191.4	13815.6	10567.9	10384.3	1738.89	1738.89	1738.89	1738.89	1738.89	1738.89	1738.89	1738.89	1738.89	8694.45	10260.8	10725.9	-	-	-
Zjbn102551	0.981498	1.03e-10	-0.852155	5.49e-05	7-hydroxy-2-methoxyphenanthrene-3,4-dione	Others	Others	C15H10O4	253.05	210.03	254.058	[M-H]-	2	-	-	720956	704733	545391	235283	247292	238913	89527.1	77903.6	99621.2	121426	144012	138545	30857.5	25649.5	18683.9	256425	237319	234637	-	-	-
Zmbn005821	0.891723	8e-06	-0.770106	0.000783077	3-hydroxy-5-methyl-3-(((3,4,6-trihydroxy-5-((4-hydroxybenzyl)oxy)tetrahydro-2H-pyran-2-yl)methoxy)carbonyl)hexanoic acid*	Others	Others	C21H30O11	457.17	127.08	458.179	[M-H]-	2	-	-	288576	219814	211864	68193.7	50250.4	46865.2	83595	89725.3	63010.6	46090.8	31303.5	39517.4	68972.9	114091	75646	118529	120547	120631	-	-	-
Zmbn005827	0.838474	9.42e-05	-0.72405	0.00227176	1-(4-hydroxybenzyl) 4-(4-(((2S,3R,4S,5S,6R)-3,4,5-trihydroxy-6-(hydroxymethyl)tetrahydro-2H-pyran-2-yl)oxy)benzyl) (R)-2-isobutyl-2-(((2S,3R,4S,5S,6R)-3,4,5-trihydroxy-6-(hydroxymethyl)tetrahydro-2H-pyran-2-yl)oxy)succinate	Others	Others	C34H46O17	725.27	457.17	726.274	[M-H]-	2	-	-	1.04771e+06	1.00197e+06	919876	252866	294196	235214	398926	415287	367101	188678	226045	218723	508483	457618	552206	572473	555546	575413	-	-	-
Zmdp000292	0.858363	4.22e-05	-0.714602	0.00275684	Arginine methyl ester*	Amino acids and derivatives	Amino acids and derivatives	C7H16N4O2	189.14	70.07	188.127	[M+H]+	1	-	-	6.73499e+06	6.68576e+06	5.88171e+06	3.78738e+06	3.70636e+06	3.44559e+06	3.73725e+06	3.28886e+06	3.44392e+06	2.9772e+06	3.95362e+06	4.45024e+06	905407	715415	874373	3.91597e+06	3.95977e+06	4.09119e+06	-	-	-
Zmfn007881	0.927519	6.44e-07	-0.757471	0.00107256	3,4-dihydroxy-2,7-dimethoxyphenanthrene	Quinones	PhenAnthraquinones	C16H14O4	269.08	226.07	270.089	[M-H]-	3	-	-	1.08209e+06	1.09133e+06	1.22839e+06	414962	494659	574018	364490	349916	378624	394506	584804	543157	40681	54852.1	36432.3	516023	464060	434472	-	CM02182	MetMap162
Zmhn001414	0.908583	2.78e-06	-0.624968	0.0127334	Resveratrol-3,5-di-O-glucoside	Others	Stilbene	C26H32O13	551.18	227.07	552.184	[M-H]-	3	-	-	19731.4	22550.4	16788.5	4506.5	6834.19	7577.17	901.3	901.3	901.3	5306.09	5336.9	15206.7	901.3	901.3	901.3	9507.92	12157	12488.4	-	CM02317	MetMap152
Zmhn001793	0.958072	1.98e-08	-0.677937	0.00547696	6-O-Caffeoyl-D-glucose*	Phenolic acids	Phenolic acids	C15H18O9	341.09	179.03	342.095	[M-H]-	1	-	-	6.33898e+06	6.81819e+06	6.55655e+06	2.31603e+06	2.81136e+06	2.42142e+06	2.62562e+06	2.63754e+06	2.68714e+06	2.97704e+06	3.27944e+06	3.54614e+06	2.68699e+06	2.96804e+06	2.95045e+06	4.17753e+06	3.77373e+06	3.9603e+06	-	CM02655	MetMap168,MetMap169
Zmjp000182	0.860973	3.76e-05	-0.717216	0.00261502	N(omega)-Methyl-L-arginine*	Amino acids and derivatives	Amino acids and derivatives	C7H16N4O2	189.13	70.07	188.127	[M+H]+	1	17035-90-4	C03884	7.02734e+06	7.03635e+06	5.68157e+06	3.79074e+06	3.91806e+06	3.74144e+06	3.3518e+06	3.33923e+06	3.53668e+06	2.84649e+06	4.17582e+06	4.47601e+06	843187	726325	799779	4.20129e+06	4.0174e+06	4.14452e+06	-	C03884	-
Zmmp000635	0.911188	2.32e-06	-0.824099	0.000158073	4,5-Dehydro-L-leucine*	Amino acids and derivatives	Amino acids and derivatives	C6H11NO2	130.09	84.08	129.079	[M+H]+	2	-	-	2.12818e+07	2.25777e+07	2.0935e+07	1.051e+07	1.07385e+07	9.93938e+06	8.68802e+06	7.04945e+06	7.92472e+06	6.93609e+06	7.20736e+06	6.81437e+06	1.16951e+07	1.10762e+07	1.03913e+07	1.20239e+07	1.28715e+07	1.16767e+07	-	-	-
Zmsp000608	0.886926	1.05e-05	-0.83454	0.000109069	3-epi-fagomine	Alkaloids	Piperidine alkaloids	C6H13NO3	148.1	86.06	147.089	[M+H]+	3	-	-	116193	84266.9	79209.8	68322.9	53613.2	55680	49598.9	52361.9	52300.7	34900.6	47692.3	49574.4	50801	31532.5	47717	54818.4	69814.5	63069.3	-	-	-
Zmsp006106	-0.916137	1.62e-06	0.789244	0.000467878	3-(((2S,3R,4S,5S,6R)-6-((((2R,3R,4R,6S)-3,4-dihydroxy-6-methyltetrahydro-2H-pyran-2-yl)oxy)methyl)-3,4,5-trihydroxytetrahydro-2H-pyran-2-yl)oxy)-5,6-dihydroxy-2-(3-hydroxy-4-methoxyphenyl)-7-methoxy-4H-chromen-4-one*	Flavonoids	Flavonols	C29H34O16	639.19	345.1	638.185	[M+H]+	1	-	-	3.98607e+06	3.71569e+06	3.6681e+06	8.67838e+06	8.6857e+06	7.7338e+06	8.85609e+06	9.75896e+06	9.33024e+06	9.58104e+06	9.27997e+06	8.91608e+06	8.14569e+06	8.05078e+06	7.8397e+06	7.1034e+06	7.49176e+06	7.83235e+06	-	-	-
Zmyn000155	0.971006	1.85e-09	-0.852164	5.49e-05	N-Acetylornithine	Amino acids and derivatives	Amino acids and derivatives	C7H14N2O3	173.11	131.08	174.1	[M-H]-	2	6205-08-09	C00437	5.25546e+06	3.93726e+06	4.31192e+06	1.12344e+06	1.28191e+06	1.23457e+06	1.11368e+06	997087	1.23033e+06	851384	798566	785360	135121	109094	115080	1.92224e+06	1.74003e+06	1.69876e+06	ko00220,ko01100,ko01110,ko01210,ko01230	C00437	-
Zmyp002823	0.844653	7.43e-05	-0.891773	7.98e-06	((1S,7aR)-hexahydro-1H-pyrrolizin-1-yl)methyl 4-hydroxy-4-methoxy-2-(4-((3,4,5,6-tetrahydroxytetrahydro-2H-pyran-2-yl)methoxy)benzyl)butanoate	Alkaloids	Pyrrole alkaloids	C26H39NO10	526.27	364.22	525.257	[M+H]+	2	-	-	609311	324971	332318	181476	281190	150064	41914	179096	126439	8382.79	8382.79	8382.79	8382.79	8382.79	8382.79	172841	308219	246444	-	-	-
Zmzn000078	-0.895614	6.37e-06	0.647188	0.00910569	Glycerone phosphate	Others	Ketone compounds	C3H7O6P	168.99	78.96	169.998	[M-H]-	3	1957-04-05	C00111	17476.9	24417.1	22891.3	47207.2	51842.3	59192.7	62495	61466.6	48329.2	34398.7	53011.7	57788.6	54676	54718.3	61834.4	48841.9	46063.2	47258.4	ko00010,ko00040,ko00051,ko00052,ko00561,ko00562,ko00564,ko00630,ko00640,ko00710,ko00760,ko01100,ko01110,ko01200,ko01230	C00111	-
Zmzn000113	0.831742	0.000120763	-0.808118	0.00026699	L-threo-3-Methylaspartate	Amino acids and derivatives	Amino acids and derivatives	C5H9NO4	146.05	102.06	147.053	[M-H]-	1	6061-13-8	C03618	818091	852208	813300	701932	690522	702962	548538	535390	557302	573957	576265	575761	615933	666751	668062	671711	633452	739827	ko00630,ko00660,ko01100,ko01200	C03618	-
